# Supplementary material for: Tomato transcriptomic response to Tuta absoluta infestation
Source: BMC Plant Biol. 2021 Aug 4;21:358. doi: 10.1186/s12870-021-03129-9 (PMC8336066; doi:10.1186/s12870-021-03129-9)
Supplement: Supplementary file 2 — Additional file 2: Dataset S1-S2. list the up- and down-regulated genes detected in the comparison Ti vs Tni. Dataset S3-S4. list the up- and down-regulated genes detected in the comparison Si vs Sni. [file 12870_2021_3129_MOESM2_ESM.xlsx]

## Sheet: title 
Tomato transcriptomic response to Tuta absoluta infestation
Daniela D’Esposito*, Daniele Manzo*, Alessandro Ricciardi, Antonio Pietro Garonna, Antonino De Natale, Luigi Frusciante, Francesco Pennacchio, Maria Raffaella Ercolano

## Sheet: Dataset S1
Dataset S1. Up-regulated genes in the comparison Ti vs Tni. Gene name = Solanum lycopersicum reference gene id, logFC = Fold change logged on base 2, p-Value = p-value of differential expression, FDR = adjusted p-value (FDR), description = gene functional annotation.
Gene Name	logFC	p-Value	FDR	description
Solyc04g011840	12.1091	3.15989e-51	9.13305e-49	Glutaredoxin (AHRD V1 **** B9I9V9_POPTR)%3B contains Interpro domain(s) IPR011905 Glutaredoxin-like%2C plant II
Solyc04g011860	10.6111	9.33864e-43	1.42638e-40	Glutaredoxin (AHRD V1 ***- B9I9V9_POPTR)%3B contains Interpro domain(s) IPR011905 Glutaredoxin-like%2C plant II
Solyc04g011830	10.5222	4.21523e-30	1.91747e-28	Glutaredoxin (AHRD V1 **** B9IBJ4_POPTR)%3B contains Interpro domain(s) IPR011905 Glutaredoxin-like%2C plant II
Solyc04g011800	10.3046	4.13434e-23	9.86935e-22	Glutaredoxin (AHRD V1 **** B9I9V9_POPTR)%3B contains Interpro domain(s) IPR011905 Glutaredoxin-like%2C plant II
Solyc04g011780	9.79054	9.28518e-28	3.51695e-26	Glutaredoxin (AHRD V1 **** B9I9V9_POPTR)%3B contains Interpro domain(s) IPR011905 Glutaredoxin-like%2C plant II
Solyc04g011850	9.40235	4.98052e-20	8.79408e-19	Glutaredoxin (AHRD V1 ***- B9I9V9_POPTR)%3B contains Interpro domain(s) IPR011905 Glutaredoxin-like%2C plant II
Solyc05g026100	9.37008	1.41551e-16	1.79684e-15	Unknown Protein (AHRD V1)
Solyc11g071470	9.26839	1.01359e-21	2.09486e-20	Hydroxycinnamoyl CoA shikimate/quinate hydroxycinnamoyltransferase-like protein (Fragment) (AHRD V1 **-- B9GF60_POPTR)%3B contains Interpro domain(s) IPR003480 Transferase
Solyc04g011790	9.26298	4.01079e-16	4.85821e-15	Glutaredoxin (AHRD V1 **** B9I9V9_POPTR)%3B contains Interpro domain(s) IPR011905 Glutaredoxin-like%2C plant II
Solyc10g009150	9.16457	6.92791e-39	7.61138e-37	Organ-specific protein S2 (AHRD V1 ***- OSS2_PEA)
Solyc01g073860	8.99535	2.68239e-18	4.0706e-17	CHP-rich zinc finger protein (AHRD V1 **-- C8CBB1_WHEAT)%3B contains Interpro domain(s) IPR011424 C1-like
Solyc07g008240	8.95227	2.06498e-13	1.85355e-12	Non-symbiotic hemoglobin protein (AHRD V1 ***- Q4VIX3_GOSHI)%3B contains Interpro domain(s) IPR001032 Leghaemoglobin
Solyc01g057080	8.75826	2.25362e-13	2.01134e-12	Ethylene-responsive transcription factor 13 (AHRD V1 *-*- ERF99_ARATH)%3B contains Interpro domain(s) IPR001471 Pathogenesis-related transcriptional factor and ERF%2C DNA-binding
Solyc04g011810	8.6006	1.33759e-14	1.3762e-13	Glutaredoxin (AHRD V1 ***- B9I9V9_POPTR)%3B contains Interpro domain(s) IPR011905 Glutaredoxin-like%2C plant II
Solyc08g074680	8.51729	6.12011e-11	4.09355e-10	Polyphenol oxidase (AHRD V1 *-*- Q41428_SOLTU)%3B contains Interpro domain(s) IPR002227 Tyrosinase
Solyc05g007830	8.38897	2.55793e-95	6.00699e-92	Expansin 2 (AHRD V1 ***- Q9FUM2_PRUAV)%3B contains Interpro domain(s) IPR002963 Expansin
Solyc03g044600	8.33138	5.77228e-29	2.42604e-27	Unknown Protein (AHRD V1)
Solyc12g087940	8.12501	5.07155e-05	0.000146583	Aspartic proteinase nepenthesin-1 (AHRD V1 **-- B6TE66_MAIZE)%3B contains Interpro domain(s) IPR001461 Peptidase A1
Solyc12g055980	8.08669	7.5584e-10	4.4113e-09	Endoglucanase 1 (AHRD V1 ***- B6U0J0_MAIZE)%3B contains Interpro domain(s) IPR001701 Glycoside hydrolase%2C family 9
Solyc12g006750	8.04319	5.6054e-13	4.76726e-12	Unknown Protein (AHRD V1)
Solyc12g006760	7.99517	2.17666e-47	5.04852e-45	Unknown Protein (AHRD V1)
Solyc12g009290	7.97533	1.00234e-09	5.7622e-09	SAUR33-auxin-responsive SAUR family member (AHRD V1 *-*- B6T035_MAIZE)%3B contains Interpro domain(s) IPR003676 Auxin responsive SAUR protein
Solyc06g075480	7.97137	2.89841e-08	1.37819e-07	Nitrate transporter (AHRD V1 **-* Q9SZY4_ARATH)%3B contains Interpro domain(s) IPR000109 TGF-beta receptor%2C type I/II extracellular region
Solyc00g071180	7.94088	2.55009e-07	1.06251e-06	Cysteine proteinase inhibitor (AHRD V1 *-** Q2VY67_9ERIC)%3B contains Interpro domain(s) IPR000010 Proteinase inhibitor I25%2C cystatin
Solyc09g089910	7.88567	4.97046e-12	3.78063e-11	Ethylene responsive transcription factor 1a (AHRD V1 *-*- C0J9I9_9ROSA)%3B contains Interpro domain(s) IPR001471 Pathogenesis-related transcriptional factor and ERF%2C DNA-binding
Solyc07g055180	7.81471	1.69653e-10	1.07606e-09	Receptor protein kinase-like protein (AHRD V1 **** Q9LJU5_ARATH)%3B contains Interpro domain(s) IPR002290 Serine/threonine protein kinase
Solyc02g066970	7.81232	1.24858e-09	7.07817e-09	Unknown Protein (AHRD V1)%3B contains Interpro domain(s) IPR001092 Basic helix-loop-helix dimerisation region bHLH
Solyc09g009980	7.74048	1.48639e-08	7.33705e-08	Auxin-induced SAUR-like protein (AHRD V1 *--- Q8S349_CAPAN)%3B contains Interpro domain(s) IPR003676 Auxin responsive SAUR protein
Solyc04g011870	7.70922	3.18399e-61	1.99392e-58	Glutaredoxin (AHRD V1 **** B9I9V9_POPTR)%3B contains Interpro domain(s) IPR011905 Glutaredoxin-like%2C plant II
Solyc02g089350	7.64516	4.56607e-67	3.72968e-64	Gibberellin regulated protein (AHRD V1 **-- Q2HRH3_MEDTR)%3B contains Interpro domain(s) IPR003854 Gibberellin regulated protein
Solyc04g081790	7.53762	3.02606e-09	1.6327e-08	GDSL esterase/lipase At5g42170 (AHRD V1 ***- GDL90_ARATH)%3B contains Interpro domain(s) IPR001087 Lipase%2C GDSL
Solyc07g062480	7.52634	3.29895e-09	1.76876e-08	S-locus glycoprotein (Fragment) (AHRD V1 *--- Q84KU4_BRAOL)%3B contains Interpro domain(s) IPR001480 Curculin-like (mannose-binding) lectin
Solyc04g074710	7.4208	8.91598e-43	1.37299e-40	Queuine tRNA-ribosyltransferase (AHRD V1 **** B9RJQ2_RICCO)%3B contains Interpro domain(s) IPR004803 Queuine tRNA-ribosyltransferase
Solyc11g006910	7.37943	5.18343e-25	1.50048e-23	Ferredoxin (AHRD V1 ***- Q9AUE1_IMPBA)%3B contains Interpro domain(s) IPR010241 Ferredoxin [2Fe-2S]%2C plant
Solyc12g006730	7.28391	1.61223e-06	5.92625e-06	Unknown Protein (AHRD V1)
Solyc12g005430	7.03788	4.3395e-17	5.80258e-16	Acyltransferase-like protein (AHRD V1 **-- Q589X8_TOBAC)%3B contains Interpro domain(s) IPR003480 Transferase
Solyc01g109500	7.00131	9.39861e-117	1.76572e-112	BURP domain-containing protein (AHRD V1 *--- B2ZPK5_SOLTU)%3B contains Interpro domain(s) IPR004873 BURP
Solyc01g073840	6.96557	4.78269e-21	9.35962e-20	CHP-rich zinc finger protein-like (AHRD V1 **-- Q9FK70_ARATH)%3B contains Interpro domain(s) IPR011424 C1-like
Solyc10g076180	6.69967	1.17753e-31	6.24922e-30	Plant-specific domain TIGR01568 family protein (AHRD V1 *--- B6U561_MAIZE)%3B contains Interpro domain(s) IPR006458 Protein of unknown function DUF623%2C plant
Solyc07g062490	6.59574	3.88396e-99	1.0424e-95	S-locus-specific glycoprotein (AHRD V1 **-- SLSG0_BRAOA)%3B contains Interpro domain(s) IPR001480 Curculin-like (mannose-binding) lectin
Solyc12g010980	6.51369	2.46497e-99	9.14388e-96	Acyltransferase-like protein (AHRD V1 **-- Q589X7_TOBAC)%3B contains Interpro domain(s) IPR003480 Transferase
Solyc06g061200	6.47404	5.88784e-14	5.66095e-13	Glycine-rich protein TomR2 (AHRD V1 *-*- Q7XJI7_SOLLC)
Solyc08g078900	6.42677	8.16146e-93	1.70366e-89	Cortical cell-delineating protein (AHRD V1 *--- B6U436_MAIZE)%3B contains Interpro domain(s) IPR013770 Plant lipid transfer protein and hydrophobic protein%2C helical
Solyc04g011820	6.39732	1.10407e-16	1.41778e-15	Glutaredoxin (AHRD V1 **** B9IBJ4_POPTR)%3B contains Interpro domain(s) IPR011905 Glutaredoxin-like%2C plant II
Solyc01g087810	6.37335	4.3151e-62	2.79544e-59	Subtilisin-like protease (AHRD V1 **-- O82777_SOLLC)%3B contains Interpro domain(s) IPR015500 Peptidase S8%2C subtilisin-related
Solyc12g096780	6.36906	2.88499e-12	2.2574e-11	Mitochondrial trans-2-enoyl-CoA reductase (AHRD V1 **-- A2A846_MOUSE)%3B contains Interpro domain(s) IPR002085 Alcohol dehydrogenase superfamily%2C zinc-containing
Solyc03g116060	6.35713	5.31487e-19	8.6078e-18	Gibberellin-regulated protein (AHRD V1 **-- B4UW77_ARAHY)%3B contains Interpro domain(s) IPR003854 Gibberellin regulated protein
Solyc01g079180	6.35022	1.00847e-30	4.82088e-29	Pectinesterase (AHRD V1 **** D8RVT4_SELML)%3B contains Interpro domain(s) IPR000070 Pectinesterase%2C catalytic
Solyc06g083050	6.31867	4.30701e-20	7.65524e-19	Serine carboxypeptidase 1 (AHRD V1 ***- B6TDA5_MAIZE)%3B contains Interpro domain(s) IPR001563 Peptidase S10%2C serine carboxypeptidase
Solyc03g096760	6.20281	2.57075e-107	1.60989e-103	Unknown Protein (AHRD V1)
Solyc06g083900	6.20073	3.37077e-25	1.00042e-23	Myb-related transcription factor (AHRD V1 **-* B2CZJ1_CAPAN)%3B contains Interpro domain(s) IPR015495 Myb transcription factor
Solyc10g008120	6.15771	1.34943e-12	1.09938e-11	O-methyltransferase 3 (AHRD V1 ***- B0ZB57_HUMLU)%3B contains Interpro domain(s) IPR016461 O-methyltransferase%2C COMT%2C eukaryota
Solyc11g005820	6.02931	1.25366e-13	1.15623e-12	Pectinesterase inhibitor (AHRD V1 **** A2Q674_MEDTR)%3B contains Interpro domain(s) IPR006501 Pectinesterase inhibitor
Solyc03g083440	5.9752	5.69207e-61	3.44958e-58	Glutamate synthase (AHRD V1 **** C1E4G5_9CHLO)%3B contains Interpro domain(s) IPR012220 Glutamate synthase%2C eukaryotic IPR006005 Glutamate synthase%2C NADH/NADPH%2C small subunit 1
Solyc02g080670	5.90721	1.23286e-21	2.52582e-20	Laccase-22 (AHRD V1 **-- LAC22_ORYSJ)%3B contains Interpro domain(s) IPR001117 Multicopper oxidase%2C type 1
Solyc09g090680	5.84205	5.95039e-21	1.15844e-19	Cysteine-rich repeat secretory protein 3 (AHRD V1 ***- CRR3_ARATH)%3B contains Interpro domain(s) IPR002902 Protein of unknown function DUF26
Solyc10g008710	5.81391	3.42827e-12	2.65815e-11	GDSL esterase/lipase At1g28610 (AHRD V1 **** GDL10_ARATH)%3B contains Interpro domain(s) IPR001087 Lipase%2C GDSL
Solyc07g052240	5.79165	3.6908e-38	3.64942e-36	Laccase-22 (AHRD V1 **-- LAC22_ORYSJ)%3B contains Interpro domain(s) IPR001117 Multicopper oxidase%2C type 1
Solyc10g047530	5.70333	5.45109e-19	8.81323e-18	Phototropic-responsive NPH3 family protein (AHRD V1 **-- D7KEU3_ARALY)%3B contains Interpro domain(s) IPR004249 NPH3
Solyc12g006720	5.69292	4.51245e-15	4.89183e-14	Unknown Protein (AHRD V1)
Solyc12g006770	5.67289	1.68923e-22	3.79612e-21	Unknown Protein (AHRD V1)
Solyc02g078150	5.59558	6.99995e-21	1.35296e-19	Plant-specific domain TIGR01615 family protein (AHRD V1 *-*- B6UDN7_MAIZE)%3B contains Interpro domain(s) IPR006502 Protein of unknown function DUF506%2C plant
Solyc02g071700	5.5947	4.00301e-18	5.96387e-17	GDSL esterase/lipase At1g29670 (AHRD V1 ***- GDL15_ARATH)%3B contains Interpro domain(s) IPR001087 Lipase%2C GDSL
Solyc04g008110	5.50083	8.89384e-111	8.35443e-107	Histidine kinase 2 (AHRD V1 **** A3QVR9_LOTJA)%3B contains Interpro domain(s) IPR006189 CHASE
Solyc03g096770	5.49255	3.85211e-30	1.76943e-28	Unknown Protein (AHRD V1)
Solyc10g055800	5.46346	2.92028e-99	9.14388e-96	Chitinase (AHRD V1 ***- B9VRK7_CAPAN)%3B contains Interpro domain(s) IPR016283 Glycoside hydrolase%2C family 19
Solyc03g007410	5.41293	1.96552e-05	6.06542e-05	BHLH transcription factor (AHRD V1 *-** Q401N4_9LILI)%3B contains Interpro domain(s) IPR011598 Helix-loop-helix DNA-binding
Solyc09g014720	5.4111	1.50948e-20	2.80501e-19	Receptor-like protein kinase At3g21340 (AHRD V1 *-** RLK6_ARATH)%3B contains Interpro domain(s) IPR002290 Serine/threonine protein kinase
Solyc10g083170	5.40466	2.38146e-09	1.29946e-08	2%2C5-dichloro-2%2C5-cyclohexadiene-1%2C4-diol dehydrogenase (AHRD V1 **** LINC_PSEPA)%3B contains Interpro domain(s) IPR002347 Glucose/ribitol dehydrogenase
Solyc01g110570	5.40368	2.80982e-20	5.09538e-19	Auxin-induced SAUR-like protein (AHRD V1 **-- Q8S349_CAPAN)%3B contains Interpro domain(s) IPR003676 Auxin responsive SAUR protein
Solyc06g054570	5.38565	1.99905e-37	1.82311e-35	Glutaredoxin family protein (AHRD V1 ***- D7LYE9_ARALY)%3B contains Interpro domain(s) IPR011905 Glutaredoxin-like%2C plant II
Solyc06g064550	5.37513	9.52794e-33	5.61133e-31	Aspartokinase-homoserine dehydrogenase (AHRD V1 **** O63067_SOYBN)%3B contains Interpro domain(s) IPR001341 Aspartate kinase region
Solyc02g091070	5.34185	1.35449e-10	8.69676e-10	Multidrug resistance protein mdtK (AHRD V1 *-*- MDTK_EDWI9)%3B contains Interpro domain(s) IPR015521 MATE family transporter related protein
Solyc01g067460	5.32571	1.08753e-39	1.3097e-37	Glutaredoxin family protein (AHRD V1 ***- D7MAF1_ARALY)%3B contains Interpro domain(s) IPR011905 Glutaredoxin-like%2C plant II
Solyc01g087570	5.27237	7.45889e-69	7.0065e-66	Unknown Protein (AHRD V1)
Solyc03g110990	5.23964	2.74742e-14	2.73679e-13	Unknown Protein (AHRD V1)
Solyc00g042840	5.21027	1.02961e-09	5.90993e-09	F-box domain containing protein (AHRD V1 ***- Q2QXK7_ORYSJ)%3B contains Interpro domain(s) IPR005174 Protein of unknown function DUF295
Solyc05g005760	5.18003	1.38675e-85	2.60529e-82	NHL repeat-containing protein (AHRD V1 ***- D7KY00_ARALY)%3B contains Interpro domain(s) IPR011042 Six-bladed beta-propeller%2C TolB-like
Solyc11g072980	5.1615	7.24192e-07	2.80697e-06	3-ketoacyl-CoA synthase 6 (AHRD V1 ***- A9XU47_GOSHI)%3B contains Interpro domain(s) IPR012392 Very-long-chain 3-ketoacyl-CoA synthase
Solyc05g007210	5.13619	2.30864e-14	2.32436e-13	DNA-binding protein-like (AHRD V1 ***- Q9FLE9_ARATH)%3B contains Interpro domain(s) IPR001092 Basic helix-loop-helix dimerisation region bHLH
Solyc05g014000	5.10566	1.8931e-39	2.20905e-37	Pectate lyase (AHRD V1 **** D3IZZ1_GOSHE)%3B contains Interpro domain(s) IPR002022 Pectate lyase/Amb allergen
Solyc04g050730	5.10019	4.1263e-14	4.02078e-13	GDSL esterase/lipase At5g33370 (AHRD V1 ***- GDL79_ARATH)%3B contains Interpro domain(s) IPR001087 Lipase%2C GDSL
Solyc11g008140	5.09372	3.03912e-39	3.43952e-37	Pectate lyase family protein (AHRD V1 ***- D7LXH4_ARALY)%3B contains Interpro domain(s) IPR002022 Pectate lyase/Amb allergen
Solyc06g069730	5.09365	4.10117e-30	1.87466e-28	Chlorophyll a-b binding protein 4%2C chloroplastic (AHRD V1 ***- CA4_ARATH)%3B contains Interpro domain(s) IPR001344 Chlorophyll A-B binding protein
Solyc07g062710	5.08651	1.18483e-23	3.02351e-22	BZIP transcription factor family protein (AHRD V1 *-** D7LW03_ARALY)%3B contains Interpro domain(s) IPR011700 Basic leucine zipper
Solyc06g065820	5.07149	6.22482e-25	1.78271e-23	Ethylene-responsive transcription factor 7 (AHRD V1 *-** ERF83_ARATH)%3B contains Interpro domain(s) IPR001471 Pathogenesis-related transcriptional factor and ERF%2C DNA-binding
Solyc08g067030	5.05576	1.01446e-53	3.52938e-51
Solyc08g074630	5.03968	3.29428e-12	2.56272e-11	Polyphenol oxidase (AHRD V1 ***- Q41428_SOLTU)%3B contains Interpro domain(s) IPR016213 Polyphenol oxidase%2C plant
Solyc12g010020	5.03372	1.0829e-05	3.47868e-05	Leucyl aminopeptidase (AHRD V1 ***- D7DWG6_NOSA0)%3B contains Interpro domain(s) IPR011356 Peptidase M17%2C leucyl aminopeptidase
Solyc00g187050	5.01869	0.000129293	0.00034755	Leucyl aminopeptidase (AHRD V1 ***- D7DWG6_NOSA0)%3B contains Interpro domain(s) IPR011356 Peptidase M17%2C leucyl aminopeptidase
Solyc07g055950	5.0109	7.0645e-08	3.1797e-07	Meiosis 5 (AHRD V1 *-*- B6T5X0_MAIZE)
Solyc03g118780	4.99792	1.62985e-22	3.67147e-21	Thaumatin-like protein (AHRD V1 ***- A8IXE7_BRACM)%3B contains Interpro domain(s) IPR001938 Thaumatin%2C pathogenesis-related
Solyc09g089510	4.98077	1.76166e-05	5.47679e-05	Proteinase inhibitor I (AHRD V1 ***- Q3S492_SOLTU)%3B contains Interpro domain(s) IPR000864 Proteinase inhibitor I13%2C potato inhibitor I
Solyc11g012120	4.95347	2.04191e-23	5.04755e-22	Plant-specific domain TIGR01615 family protein (AHRD V1 *-*- B6UDN7_MAIZE)%3B contains Interpro domain(s) IPR006502 Protein of unknown function DUF506%2C plant
Solyc07g041720	4.93659	1.36886e-25	4.25774e-24	Oxalate oxidase-like germin 171 (AHRD V1 **** Q9FPQ0_BETVU)%3B contains Interpro domain(s) IPR014710 RmlC-like jelly roll fold
Solyc10g079700	4.93515	7.78757e-29	3.22258e-27	Response regulator 6 (AHRD V1 ***- Q9FRY9_MAIZE)%3B contains Interpro domain(s) IPR001789 Signal transduction response regulator%2C receiver region
Solyc09g083440	4.93355	2.51224e-06	8.95586e-06	Proteinase inhibitor I (AHRD V1 ***- Q53X28_SOLTU)%3B contains Interpro domain(s) IPR000864 Proteinase inhibitor I13%2C potato inhibitor I
Solyc08g005650	4.90759	9.46399e-47	1.97555e-44	Cytochrome P450
Solyc06g062580	4.89652	3.8203e-43	6.03126e-41	Beta-galactosidase (AHRD V1 ***- B2LYJ3_PETHY)%3B contains Interpro domain(s) IPR001944 Glycoside hydrolase%2C family 35
Solyc01g006650	4.89346	1.54825e-48	3.93067e-46	Ethylene insensitive 3 class transcription factor (AHRD V1 *-** D5L144_MALDO)%3B contains Interpro domain(s) IPR006957 Ethylene insensitive 3
Solyc07g007860	4.88462	7.27957e-11	4.81215e-10	Proline rich protein (Fragment) (AHRD V1 ---- P93274_MALDO)%3B contains Interpro domain(s) IPR013770 Plant lipid transfer protein and hydrophobic protein%2C helical
Solyc09g075700	4.87643	1.04011e-06	3.94441e-06	Gibberellin receptor GID1L2 (AHRD V1 **-- B6T2M3_MAIZE)%3B contains Interpro domain(s) IPR013094 Alpha/beta hydrolase fold-3
Solyc04g053110	4.87303	3.58042e-21	7.05827e-20	Glutaredoxin (AHRD V1 **** B9I9V9_POPTR)%3B contains Interpro domain(s) IPR011905 Glutaredoxin-like%2C plant II
Solyc10g078360	4.85969	9.95261e-07	3.78731e-06	3-oxoacyl-reductase (AHRD V1 **-- B6UEX0_MAIZE)%3B contains Interpro domain(s) IPR002347 Glucose/ribitol dehydrogenase
Solyc05g052300	4.85236	1.19806e-106	5.627e-103	Amino acid transporter (AHRD V1 **** B9HYI5_POPTR)%3B contains Interpro domain(s) IPR013057 Amino acid transporter%2C transmembrane
Solyc06g049050	4.83539	2.05975e-69	2.03666e-66	Expansin (AHRD V1 ***- O82625_SOLLC)%3B contains Interpro domain(s) IPR007112 Expansin 45%2C endoglucanase-like IPR007117 Pollen allergen/expansin%2C C-terminal
Solyc10g078680	4.82219	9.40318e-24	2.4333e-22	Phosphoribosylanthranilate transferase (Fragment) (AHRD V1 *--- Q43085_PEA)%3B contains Interpro domain(s) IPR013583 Phosphoribosyltransferase C-terminal%2C plant
Solyc07g049370	4.81517	5.26847e-16	6.2921e-15	Glucan endo-1 3-beta-glucosidase A6 (AHRD V1 ***- B6TIF7_MAIZE)%3B contains Interpro domain(s) IPR000490 Glycoside hydrolase%2C family 17
Solyc01g079940	4.81436	1.0349e-25	3.28423e-24	Xylanase inhibitor (Fragment) (AHRD V1 **-- Q53IQ4_WHEAT)%3B contains Interpro domain(s) IPR001461 Peptidase A1
Solyc04g071070	4.80192	7.95174e-06	2.61392e-05	Unknown Protein (AHRD V1)%3B contains Interpro domain(s) IPR006706 Extensin-like region
Solyc03g113720	4.79131	4.72529e-24	1.25387e-22	Two-component response regulator ARR3 (AHRD V1 **** B6TSM4_MAIZE)%3B contains Interpro domain(s) IPR001789 Signal transduction response regulator%2C receiver region
Solyc03g123410	4.72567	2.37204e-20	4.33075e-19	Oxalate oxidase-like germin 171 (AHRD V1 **** Q9FPQ0_BETVU)%3B contains Interpro domain(s) IPR014710 RmlC-like jelly roll fold
Solyc01g080020	4.69192	1.29872e-60	7.39364e-58	Xylanase inhibitor (Fragment) (AHRD V1 **-- Q53IQ4_WHEAT)%3B contains Interpro domain(s) IPR001461 Peptidase A1
Solyc04g076190	4.6883	9.86607e-08	4.34797e-07	Aspartic proteinase nepenthesin-1 (AHRD V1 **-- B6TDX6_MAIZE)%3B contains Interpro domain(s) IPR001461 Peptidase A1
Solyc11g005150	4.66896	5.8205e-12	4.38979e-11	Leucine-rich repeat family protein (AHRD V1 *--- D7M406_ARALY)%3B contains Interpro domain(s) IPR006706 Extensin-like region
Solyc02g070090	4.66875	1.35325e-11	9.78874e-11	FAD-binding domain-containing protein (AHRD V1 **-- D7KFN2_ARALY)%3B contains Interpro domain(s) IPR006094 FAD linked oxidase%2C N-terminal
Solyc03g093790	4.62665	1.22324e-20	2.29351e-19	Cyclin-like (AHRD V1 **** Q6H3X9_ORYSJ)%3B contains Interpro domain(s) IPR012389 Negative regulatory factor PREG
Solyc02g071610	4.61783	2.86324e-52	9.27444e-50	GDSL esterase/lipase At5g45670 (AHRD V1 ***- GDL82_ARATH)%3B contains Interpro domain(s) IPR001087 Lipase%2C GDSL
Solyc03g031620	4.57915	3.24249e-68	2.90079e-65	Phosphoadenosine phosphosulfate reductase (AHRD V1 *-** B7I7M3_ACIB5)%3B contains Interpro domain(s) IPR004508 Thioredoxin-independent 5'-adenylylsulphate reductase
Solyc03g007760	4.55117	2.2435e-29	9.802e-28	Cell division protease ftsH (AHRD V1 *--- FTSH_SHIFL)%3B contains Interpro domain(s) IPR003959 ATPase%2C AAA-type%2C core
Solyc04g080690	4.54889	4.02395e-08	1.87495e-07	SEC14-like protein (AHRD V1 **-- Q9T027_ARATH)%3B contains Interpro domain(s) IPR001251 Cellular retinaldehyde-binding/triple function%2C C-terminal
Solyc09g098510	4.53686	3.17207e-16	3.88738e-15	Unknown Protein (AHRD V1)%3B contains Interpro domain(s) IPR006706 Extensin-like region
Solyc01g059980	4.52416	1.67014e-22	3.75772e-21	Beta-glucanase (AHRD V1 ***- Q53X08_NICPL)%3B contains Interpro domain(s) IPR000490 Glycoside hydrolase%2C family 17
Solyc02g065030	4.52035	4.5031e-11	3.05635e-10	Pentatricopeptide repeat-containing protein (AHRD V1 ***- D7M9F5_ARALY)%3B contains Interpro domain(s) IPR002885 Pentatricopeptide repeat
Solyc09g091430	4.49829	2.01624e-55	8.41758e-53	Pectate lyase 1-27 (AHRD V1 **** B9TU35_9ROSI)%3B contains Interpro domain(s) IPR002022 Pectate lyase/Amb allergen
Solyc04g008090	4.49721	1.40171e-09	7.90572e-09	Zinc-binding protein (AHRD V1 **-* Q948W7_PEA)%3B contains Interpro domain(s) IPR006734 Protein of unknown function DUF597
Solyc12g015690	4.48938	1.47249e-21	2.9939e-20	Fasciclin-like arabinogalactan protein 10 (AHRD V1 ***- A9XTL5_GOSHI)%3B contains Interpro domain(s) IPR000782 FAS1 domain
Solyc02g065170	4.48602	2.36336e-63	1.70771e-60	Laccase-22 (AHRD V1 **-- LAC22_ORYSJ)%3B contains Interpro domain(s) IPR001117 Multicopper oxidase%2C type 1
Solyc11g007250	4.47988	5.83449e-12	4.39681e-11	Protein kinase like protein (AHRD V1 ***- Q0WN21_ARATH)%3B contains Interpro domain(s) IPR002290 Serine/threonine protein kinase
Solyc12g043030	4.46219	1.3754e-17	1.93266e-16	Sulfate transporter (AHRD V1 ***- A1YKF8_BRASY)
Solyc09g075670	4.44129	7.07874e-16	8.33259e-15	Gibberellin receptor GID1L2 (AHRD V1 **-- B6TIA5_MAIZE)%3B contains Interpro domain(s) IPR013094 Alpha/beta hydrolase fold-3
Solyc01g096450	4.43968	6.51711e-19	1.04558e-17	Aspartic proteinase nepenthesin-1 (AHRD V1 **-- B6TDX6_MAIZE)%3B contains Interpro domain(s) IPR001461 Peptidase A1
Solyc04g055210	4.42706	4.96405e-36	4.03721e-34	Asparagine synthetase (AHRD V1 ***- Q9ZST7_ARATH)%3B contains Interpro domain(s) IPR000583 Glutamine amidotransferase%2C class-II
Solyc09g007940	4.40844	6.92862e-31	3.42419e-29	Adenosine kinase (AHRD V1 **** D2D2Z6_GOSHI)%3B contains Interpro domain(s) IPR001805 Adenosine kinase
Solyc06g009500	4.40233	3.95816e-11	2.70702e-10	Pentatricopeptide repeat-containing protein (AHRD V1 ***- D7L041_ARALY)%3B contains Interpro domain(s) IPR002885 Pentatricopeptide repeat
Solyc04g024840	4.39489	2.48534e-12	1.95938e-11	GDSL esterase/lipase 1 (AHRD V1 **** GLIP1_ARATH)%3B contains Interpro domain(s) IPR001087 Lipase%2C GDSL
Solyc04g054950	4.38254	5.98042e-17	7.90669e-16	Tropinone reductase I (AHRD V1 **-- Q8VXN5_CALSE)%3B contains Interpro domain(s) IPR002347 Glucose/ribitol dehydrogenase
Solyc07g049300	4.37178	1.90414e-31	9.88208e-30	Endoglucanase 1 (AHRD V1 ***- B6U0J0_MAIZE)%3B contains Interpro domain(s) IPR001701 Glycoside hydrolase%2C family 9
Solyc01g086920	4.36367	1.6331e-50	4.51192e-48	LRR receptor-like serine/threonine-protein kinase%2C RLP
Solyc04g005660	4.36304	1.19354e-12	9.77466e-12	Transcription factor style2.1 (AHRD V1 **** B6CG45_SOLPN)%3B contains Interpro domain(s) IPR001092 Basic helix-loop-helix dimerisation region bHLH
Solyc12g043040	4.3521	1.82513e-08	8.89231e-08	Sulfate transporter (AHRD V1 ***- A1YKF8_BRASY)%3B contains Interpro domain(s) IPR011547 Sulphate transporter
Solyc02g094190	4.34967	3.1266e-16	3.83417e-15	Nodulin family protein (AHRD V1 ***- D7M603_ARALY)%3B contains Interpro domain(s) IPR010658 Nodulin-like
Solyc11g008080	4.32616	3.55029e-22	7.71233e-21	Unknown Protein (AHRD V1)%3B contains Interpro domain(s) IPR012862 Protein of unknown function DUF1635
Solyc08g023510	4.32194	1.19857e-06	4.50172e-06	Unknown Protein (AHRD V1)
Solyc03g093360	4.30814	3.6359e-17	4.8966e-16	Wound/stress protein (AHRD V1 **-- Q672Q3_SOLLC)%3B contains Interpro domain(s) IPR001024 Lipoxygenase%2C LH2
Solyc07g053640	4.29137	2.45269e-34	1.70032e-32	Arabinogalactan-protein (AHRD V1 *-*- Q41256_NICAL)
Solyc07g018240	4.28934	1.11614e-17	1.58495e-16	Elongation of very long chain fatty acids protein 4 (AHRD V1 *-** B0W9Y0_CULQU)%3B contains Interpro domain(s) IPR002076 GNS1/SUR4 membrane protein
Solyc04g014510	4.28522	9.23409e-59	4.56529e-56	Glutamine synthetase (AHRD V1 ***- Q5QJ64_9SOLA)%3B contains Interpro domain(s) IPR008146 Glutamine synthetase%2C catalytic region
Solyc03g114180	4.28135	3.72484e-12	2.87504e-11	UDP-glucosyltransferase HvUGT5876 (AHRD V1 ***- D3WYW1_HORVD)%3B contains Interpro domain(s) IPR002213 UDP-glucuronosyl/UDP-glucosyltransferase
Solyc09g089520	4.27988	0.00018981	0.000494449	Proteinase inhibitor I (AHRD V1 ***- Q3S492_SOLTU)%3B contains Interpro domain(s) IPR000864 Proteinase inhibitor I13%2C potato inhibitor I
Solyc12g040640	4.27866	7.80369e-09	3.99586e-08	Beta-glucosidase (AHRD V1 ***- D7L7Z3_ARALY)%3B contains Interpro domain(s) IPR001360 Glycoside hydrolase%2C family 1
Solyc04g025530	4.2776	1.59835e-06	5.87867e-06	Glutamate decarboxylase (AHRD V1 **** Q1I1D8_CITSI)%3B contains Interpro domain(s) IPR010107 Glutamate decarboxylase
Solyc02g081040	4.27688	1.57438e-21	3.18727e-20	Receptor-like kinase (AHRD V1 *-** A7VM33_MARPO)%3B contains Interpro domain(s) IPR002290 Serine/threonine protein kinase
Solyc10g008320	4.27375	5.47514e-31	2.72971e-29	Unknown Protein (AHRD V1)
Solyc12g088930	4.26566	2.65144e-14	2.64819e-13	Plant-specific domain TIGR01570 family protein (AHRD V1 ***- B6U390_MAIZE)%3B contains Interpro domain(s) IPR006460 Protein of unknown function DUF617%2C plant
Solyc07g063170	4.26279	1.43523e-39	1.70656e-37	Unknown Protein (AHRD V1)
Solyc05g006570	4.25907	1.4738e-08	7.27875e-08	Receptor like kinase%2C RLK
Solyc12g011030	4.24484	4.51444e-24	1.20131e-22	Xyloglucan endotransglucosylase/hydrolase 7 (AHRD V1 ***- C0IRG6_ACTDE)%3B contains Interpro domain(s) IPR016455 Xyloglucan endotransglucosylase/hydrolase
Solyc05g007450	4.24197	1.06254e-13	9.8877e-13	Origin recognition complex subunit 6 (AHRD V1 ***- B6TX59_MAIZE)%3B contains Interpro domain(s) IPR008721 Origin recognition complex subunit 6
Solyc09g011870	4.23372	1.92628e-19	3.25148e-18	Prephenate dehydrogenase family protein (AHRD V1 ***- D7KDI5_ARALY)%3B contains Interpro domain(s) IPR016040 NAD(P)-binding domain
Solyc12g008650	4.23094	5.898e-11	3.95453e-10	Inositol oxygenase (AHRD V1 ***- A5FF81_FLAJ1)%3B contains Interpro domain(s) IPR007828 Protein of unknown function DUF706
Solyc12g009650	4.22121	5.2902e-38	5.07077e-36	Proline rich protein (Fragment) (AHRD V1 *--- P93274_MALDO)%3B contains Interpro domain(s) IPR013770 Plant lipid transfer protein and hydrophobic protein%2C helical
Solyc01g111350	4.20539	3.57092e-47	7.89503e-45	Nodulin family protein (AHRD V1 ***- D7MDH3_ARALY)%3B contains Interpro domain(s) IPR010658 Nodulin-like
Solyc01g110590	4.19334	9.69489e-18	1.38825e-16	Auxin-induced SAUR-like protein (AHRD V1 ***- Q8S349_CAPAN)%3B contains Interpro domain(s) IPR003676 Auxin responsive SAUR protein
Solyc07g056230	4.16143	6.74196e-11	4.48041e-10	Cytochrome B561-related protein (AHRD V1 **-- Q1H8M6_BETVU)%3B contains Interpro domain(s) IPR006593 Cytochrome b561/ferric reductase transmembrane
Solyc04g079560	4.16086	7.59426e-31	3.72515e-29	Lysine/histidine transporter (AHRD V1 **** B9MVJ1_POPTR)%3B contains Interpro domain(s) IPR013057 Amino acid transporter%2C transmembrane
Solyc06g076860	4.15562	1.23219e-35	9.44867e-34	Cell division control protein 6 homolog (AHRD V1 **-- CDC6_MOUSE)%3B contains Interpro domain(s) IPR016314 Cell division control%2C Cdc6
Solyc02g032860	4.15403	5.76849e-47	1.23151e-44	Phosphoadenosine phosphosulfate reductase (AHRD V1 *-** A6EX37_9ALTE)%3B contains Interpro domain(s) IPR004508 Thioredoxin-independent 5'-adenylylsulphate reductase
Solyc12g089050	4.14579	5.84387e-10	3.44381e-09	Wax synthase isoform 1 (AHRD V1 **-- Q84XY9_VITVI)
Solyc09g089540	4.14432	5.35564e-05	0.00015406	Proteinase inhibitor I (AHRD V1 ***- Q3S492_SOLTU)%3B contains Interpro domain(s) IPR000864 Proteinase inhibitor I13%2C potato inhibitor I
Solyc09g084490	4.13096	6.80492e-05	0.000191814	Proteinase inhibitor I (AHRD V1 ***- Q53X28_SOLTU)%3B contains Interpro domain(s) IPR000864 Proteinase inhibitor I13%2C potato inhibitor I
Solyc03g116000	4.12611	7.55888e-13	6.35386e-12	Pentatricopeptide repeat-containing protein (AHRD V1 ***- D7LNE6_ARALY)%3B contains Interpro domain(s) IPR002885 Pentatricopeptide repeat
Solyc05g015330	4.12478	4.2312e-12	3.24587e-11	Nuclear transcription factor Y subunit C-1 (AHRD V1 **-- B6SWV5_MAIZE)%3B contains Interpro domain(s) IPR003958 Transcription factor CBF/NF-Y/archaeal histone
Solyc07g007760	4.12259	1.10929e-30	5.28942e-29	Defensin protein (AHRD V1 ***- B1N681_SOLPI)%3B contains Interpro domain(s) IPR008177 Gamma Purothionin
Solyc01g111330	4.12143	1.56677e-25	4.85724e-24	Thaumatin-like protein (AHRD V1 ***- Q9STX6_ARATH)%3B contains Interpro domain(s) IPR001938 Thaumatin%2C pathogenesis-related
Solyc07g052210	4.12105	6.35219e-24	1.66674e-22	Unknown Protein (AHRD V1)
Solyc12g009820	4.1154	2.6252e-51	7.95477e-49	Processive diacylglycerol glucosyltransferase (AHRD V1 **-- C5NXP9_9BACL)%3B contains Interpro domain(s) IPR009695 Monogalactosyldiacylglycerol synthase
Solyc00g049520	4.10943	1.8718e-25	5.71796e-24	Unknown Protein (AHRD V1)
Solyc02g092550	4.10802	3.11223e-11	2.16233e-10	LOB domain protein 38 (AHRD V1 ***- D7LT02_ARALY)%3B contains Interpro domain(s) IPR004883 Lateral organ boundaries%2C LOB
Solyc01g080070	4.09738	1.39272e-25	4.32479e-24	Copper chaperone (AHRD V1 *--- B6TJ24_MAIZE)%3B contains Interpro domain(s) IPR006121 Heavy metal transport/detoxification protein
Solyc07g052960	4.08101	3.29789e-09	1.7687e-08	GRAS family transcription factor (AHRD V1 **-* B9MXU3_POPTR)%3B contains Interpro domain(s) IPR005202 GRAS transcription factor
Solyc03g113910	4.08019	4.90852e-11	3.32192e-10	Gibberellin-regulated protein 2 (AHRD V1 *--- B6SKV6_MAIZE)%3B contains Interpro domain(s) IPR003854 Gibberellin regulated protein
Solyc03g113970	4.0799	1.02587e-10	6.66193e-10	Calmodulin binding protein (AHRD V1 **** B6TKI3_MAIZE)%3B contains Interpro domain(s) IPR012416 Calmodulin binding protein-like
Solyc04g081870	4.06856	8.7261e-66	6.55749e-63	Expansin (AHRD V1 ***- Q9FVH0_SOLLC)%3B contains Interpro domain(s) IPR002963 Expansin
Solyc01g006090	4.06119	3.65221e-51	1.03961e-48	rRNA processing protein Ebp2 (AHRD V1 **-- B6K460_SCHJY)%3B contains Interpro domain(s) IPR008610 Eukaryotic rRNA processing
Solyc04g055200	4.06057	7.51106e-74	1.17592e-70	Asparagine synthase (Glutamine-hydrolyzing) (AHRD V1 **** D3RMB0_KLEVT)%3B contains Interpro domain(s) IPR001962 Asparagine synthase
Solyc03g082860	4.05828	5.91122e-23	1.38471e-21	Histone-lysine N-methyltransferase (AHRD V1 **-- D8L815_9POAL)%3B contains Interpro domain(s) IPR001214 SET
Solyc00g028960	4.05777	1.59848e-17	2.22614e-16	Glutaredoxin family protein (AHRD V1 ***- D7KCA5_ARALY)%3B contains Interpro domain(s) IPR011905 Glutaredoxin-like%2C plant II
Solyc01g006400	4.05341	3.09906e-10	1.89958e-09	Cysteine-rich extensin-like protein-4 (AHRD V1 *-*- Q08197_TOBAC)
Solyc09g092320	4.04958	2.45403e-46	5.01128e-44	RNA binding protein-like protein (AHRD V1 **** Q3HVL3_SOLTU)%3B contains Interpro domain(s) IPR015465 RNA recognition motif%2C glycine rich protein
Solyc09g010430	4.03938	9.78049e-08	4.3143e-07	Unknown Protein (AHRD V1)
Solyc03g098640	4.02465	1.24503e-72	1.79926e-69	Mpv17 protein (AHRD V1 *--- Q178F4_AEDAE)%3B contains Interpro domain(s) IPR007248 Mpv17/PMP22
Solyc12g096530	4.02295	2.08785e-06	7.54752e-06	Peroxidase (AHRD V1 ***- D7MRK0_ARALY)%3B contains Interpro domain(s) IPR002016 Haem peroxidase%2C plant/fungal/bacterial
Solyc08g077100	4.01491	3.31545e-08	1.56226e-07	Baculoviral IAP repeat-containing protein 3 (AHRD V1 *--- BIRC3_MOUSE)%3B contains Interpro domain(s) IPR001841 Zinc finger%2C RING-type
Solyc03g094020	3.98595	1.10028e-14	1.14268e-13	Alpha-glucosidase-like (AHRD V1 ***- Q5NBJ1_ORYSJ)%3B contains Interpro domain(s) IPR000322 Glycoside hydrolase%2C family 31
Solyc08g006150	3.98323	7.39422e-71	9.92252e-68	ChaC cation transport regulator-like 1 (AHRD V1 ***- A8KBI8_DANRE)%3B contains Interpro domain(s) IPR006840 ChaC-like protein
Solyc04g053000	3.98211	4.33147e-10	2.59902e-09	Auxin-induced SAUR-like protein (AHRD V1 ***- Q8S351_CAPAN)%3B contains Interpro domain(s) IPR003676 Auxin responsive SAUR protein
Solyc02g081210	3.97703	5.13326e-17	6.82026e-16	Expansin (AHRD V1 ***- Q9ZP33_SOLLC)%3B contains Interpro domain(s) IPR002963 Expansin
Solyc12g014500	3.97611	1.4529e-14	1.48993e-13	S-adenosyl-L-methionine salicylic acid carboxyl methyltransferase-like protein (AHRD V1 **** Q9FLN8_ARATH)%3B contains Interpro domain(s) IPR005299 SAM dependent carboxyl methyltransferase
Solyc04g011480	3.97533	5.19492e-07	2.06949e-06	UPF0497 membrane protein 17 (AHRD V1 ***- U497H_RICCO)%3B contains Interpro domain(s) IPR006459 Uncharacterised protein family UPF0497%2C trans-membrane plant subgroup
Solyc10g080690	3.95584	2.87029e-14	2.8471e-13	Patatin-like protein 3 (AHRD V1 ***- B6TPQ5_MAIZE)%3B contains Interpro domain(s) IPR002641 Patatin
Solyc01g098480	3.95537	2.78506e-13	2.45763e-12	Pentatricopeptide repeat-containing protein (AHRD V1 ***- D7LKZ8_ARALY)%3B contains Interpro domain(s) IPR002885 Pentatricopeptide repeat
Solyc07g006710	3.94709	1.5783e-22	3.56388e-21	Pathogenesis-related protein PR-1 (AHRD V1 **-- B6UG61_MAIZE)%3B contains Interpro domain(s) IPR002413 Ves allergen
Solyc10g078220	3.93938	3.56632e-08	1.67334e-07	Cytochrome P450
Solyc01g086650	3.93501	7.80904e-07	3.01249e-06	Siroheme synthase (AHRD V1 ***- A3LD64_PSEAE)%3B contains Interpro domain(s) IPR006366 Uroporphyrin-III C-methyltransferase%2C C-terminal
Solyc10g081320	3.93436	1.92135e-09	1.06416e-08	MYB transcription factor (AHRD V1 *--* Q9C5P9_ARATH)%3B contains Interpro domain(s) IPR015495 Myb transcription factor
Solyc02g085230	3.92892	8.18803e-61	4.80714e-58	Nucleolar protein 6 (AHRD V1 ***- B0WP83_CULQU)%3B contains Interpro domain(s) IPR005554 Nrap protein
Solyc10g055770	3.92418	1.30602e-13	1.20217e-12	Multidrug resistance protein 2 (AHRD V1 **-- C2V7S0_BACCE)%3B contains Interpro domain(s) IPR016196 Major facilitator superfamily%2C general substrate transporter
Solyc02g092890	3.92085	0.000109771	0.000298662	Unknown Protein (AHRD V1)
Solyc08g068710	3.91437	1.98897e-31	1.02656e-29	N-acetyltransferase (AHRD V1 ***- B6SUK9_MAIZE)%3B contains Interpro domain(s) IPR000182 GCN5-related N-acetyltransferase
Solyc11g005280	3.91132	4.55247e-09	2.39304e-08	Ring finger protein (AHRD V1 *-*- O49869_HORVU)%3B contains Interpro domain(s) IPR018957 Zinc finger%2C C3HC4 RING-type
Solyc01g090890	3.90847	8.2514e-12	6.11515e-11	Xenotropic and polytropic retrovirus receptor (AHRD V1 **-- B2GU54_XENTR)%3B contains Interpro domain(s) IPR004331 SPX%2C N-terminal
Solyc06g072240	3.90736	1.55259e-06	5.72606e-06	Histone H4 (AHRD V1 ***- B6T0P4_MAIZE)%3B contains Interpro domain(s) IPR001951 Histone H4
Solyc07g065730	3.90598	1.98183e-20	3.64312e-19	Pentatricopeptide repeat-containing protein (AHRD V1 ***- D7MMG1_ARALY)%3B contains Interpro domain(s) IPR002885 Pentatricopeptide repeat
Solyc04g074310	3.90136	5.28847e-12	4.01432e-11	RNA-binding protein 68390-68829 (AHRD V1 *--- Q9C805_ARATH)%3B contains Interpro domain(s) IPR000504 RNA recognition motif%2C RNP-1
Solyc01g097970	3.90034	2.42095e-29	1.04777e-27	Deoxyuridine 5%26apos-triphosphate nucleotidohydrolase (AHRD V1 ***- C1E7B9_9CHLO)%3B contains Interpro domain(s) IPR008181 DeoxyUTP pyrophosphatase subfamily 1
Solyc04g082140	3.89693	8.65941e-48	2.0857e-45	Laccase-22 (AHRD V1 **-- LAC22_ORYSJ)%3B contains Interpro domain(s) IPR001117 Multicopper oxidase%2C type 1
Solyc10g055780	3.89584	4.3442e-05	0.000126849	Chitinase (AHRD V1 ***- B9VRK7_CAPAN)%3B contains Interpro domain(s) IPR000726 Glycoside hydrolase%2C family 19%2C catalytic
Solyc03g120660	3.89481	1.49633e-07	6.43726e-07	D-isomer specific 2-hydroxyacid dehydrogenase (AHRD V1 ***- Q39JN8_BURS3)%3B contains Interpro domain(s) IPR006139 D-isomer specific 2-hydroxyacid dehydrogenase%2C catalytic region
Solyc09g008320	3.89061	4.48233e-41	6.10214e-39	Xyloglucan endotransglucosylase/hydrolase 12 (AHRD V1 **** C0IRH1_9ERIC)%3B contains Interpro domain(s) IPR016455 Xyloglucan endotransglucosylase/hydrolase
Solyc12g019320	3.88779	8.99463e-19	1.42121e-17	Multidrug resistance protein mdtK (AHRD V1 **-- MDTK_ENTS8)%3B contains Interpro domain(s) IPR002528 Multi antimicrobial extrusion protein MatE
Solyc03g096780	3.88633	1.76504e-28	7.08543e-27	Unknown Protein (AHRD V1)
Solyc10g083740	3.8837	3.96248e-63	2.75715e-60	60S ribosomal protein L24 (AHRD V1 ***- B3TM46_ELAGV)%3B contains Interpro domain(s) IPR000988 Ribosomal protein L24e
Solyc02g089050	3.88248	6.90571e-28	2.65312e-26	AT1G18620 protein (Fragment) (AHRD V1 *--- B9DFG2_ARATH)
Solyc08g080640	3.88063	1.6253e-12	1.30825e-11	Osmotin-like protein (Fragment) (AHRD V1 **-- Q8S4L1_SOLNI)%3B contains Interpro domain(s) IPR017949 Thaumatin%2C conserved site IPR001938 Thaumatin%2C pathogenesis-related
Solyc03g007170	3.87941	5.18974e-55	1.98979e-52	FK506-binding protein 4 (EC 5.2.1.8)(Peptidyl-prolyl cis-trans isomerase)(PPIase)(Rotamase) (AHRD V1 *-** C8V696_EMENI)%3B contains Interpro domain(s) IPR001179 Peptidyl-prolyl cis-trans isomerase%2C FKBP-type
Solyc08g022240	3.86079	6.96176e-13	5.87031e-12	Lipase-like protein (AHRD V1 ***- Q8LF19_ARATH)%3B contains Interpro domain(s) IPR002921 Lipase%2C class 3
Solyc03g119910	3.85398	3.31655e-15	3.65409e-14	Gibberellin 3-beta-hydroxylase (Fragment) (AHRD V1 **** D9ZZW4_9FABA)%3B contains Interpro domain(s) IPR005123 Oxoglutarate and iron-dependent oxygenase
Solyc08g082200	3.84379	8.22696e-25	2.33827e-23	DNA primase (AHRD V1 **** B6T4S3_MAIZE)%3B contains Interpro domain(s) IPR014052 DNA primase%2C small subunit%2C eukaryotic and archaeal
Solyc00g007080	3.84151	2.47905e-10	1.53659e-09	Unknown Protein (AHRD V1)%3B contains Interpro domain(s) IPR007514 CHD5-like protein
Solyc12g049400	3.83801	3.13526e-10	1.91864e-09	Protein TIFY 3B (AHRD V1 *--- TIF3B_ARATH)%3B contains Interpro domain(s) IPR010399 Tify
Solyc12g088390	3.83477	4.67449e-22	1.0048e-20	Zinc-finger protein (AHRD V1 ***- Q40899_PETHY)%3B contains Interpro domain(s) IPR007087 Zinc finger%2C C2H2-type
Solyc11g072800	3.83308	4.91622e-08	2.26375e-07	NADPH oxidase (AHRD V1 ***- Q8W4X7_TOBAC)%3B contains Interpro domain(s) IPR013121 Ferric reductase%2C NAD binding
Solyc03g121170	3.81828	7.02023e-15	7.46401e-14	GDSL esterase/lipase At5g22810 (AHRD V1 ***- GDL78_ARATH)%3B contains Interpro domain(s) IPR001087 Lipase%2C GDSL
Solyc06g062560	3.81758	5.85492e-05	0.00016727	Phosphatase (AHRD V1 ***- D2V497_NAEGR)%3B contains Interpro domain(s) IPR016965 Pyridoxal phosphate phosphatase%2C PHOSPHO2
Solyc02g068470	3.81729	3.35409e-05	9.97518e-05	Unknown Protein (AHRD V1)
Solyc11g007630	3.81708	1.11544e-09	6.36757e-09	Bark storage protein 3 (Fragment) (AHRD V1 ***- D6BV82_POPCN)%3B contains Interpro domain(s) IPR018017 Nucleoside phosphorylase%2C family 1
Solyc10g008720	3.80902	9.62192e-35	6.87327e-33	GDSL esterase/lipase At1g28580 (AHRD V1 ***- GDL7_ARATH)%3B contains Interpro domain(s) IPR001087 Lipase%2C GDSL
Solyc09g092080	3.80733	9.34009e-71	1.16981e-67	50S ribosomal protein L7Ae (AHRD V1 **-- B2WJB2_PYRTR)%3B contains Interpro domain(s) IPR004038 Ribosomal protein L7Ae/L30e/S12e/Gadd45
Solyc08g007580	3.79847	1.25198e-31	6.62562e-30	Uncharacterized conserved membrane protein (AHRD V1 *--- A5GTT0_SYNR3)%3B contains Interpro domain(s) IPR019634 Protein of unknown function DUF2499
Solyc10g055390	3.79832	8.01478e-19	1.27281e-17	Nodulin family protein (AHRD V1 ***- D7MDH3_ARALY)%3B contains Interpro domain(s) IPR010658 Nodulin-like
Solyc06g009190	3.79714	3.3766e-17	4.56376e-16	Pectinesterase (AHRD V1 ***- B9SAU4_RICCO)%3B contains Interpro domain(s) IPR000070 Pectinesterase%2C catalytic
Solyc03g098300	3.79467	2.08369e-09	1.14798e-08	Ornithine decarboxylase (AHRD V1 **** A2TBH8_THECC)%3B contains Interpro domain(s) IPR002433 Ornithine decarboxylase
Solyc12g017970	3.78143	1.35759e-15	1.55899e-14	Unknown Protein (AHRD V1)
Solyc09g092510	3.781	5.31303e-24	1.40191e-22	Unknown Protein (AHRD V1)
Solyc11g072080	3.77693	1.20392e-20	2.26181e-19	Kelch-like 13 (AHRD V1 *-*- Q66IL9_XENTR)%3B contains Interpro domain(s) IPR015915 Kelch-type beta propeller
Solyc01g081340	3.77228	9.99869e-12	7.32341e-11	Carboxyl methyltransferase 4 (AHRD V1 **** B0ZB58_HUMLU)%3B contains Interpro domain(s) IPR005299 SAM dependent carboxyl methyltransferase
Solyc07g007260	3.76546	2.41249e-09	1.31553e-08	Metallocarboxypeptidase inhibitor (AHRD V1 ***- MCPI_SOLLC)%3B contains Interpro domain(s) IPR004231 Proteinase inhibitor I37%2C carboxypeptidase A
Solyc10g084320	3.76462	2.08566e-12	1.65609e-11	Subtilisin-like protease (AHRD V1 **-- O82777_SOLLC)%3B contains Interpro domain(s) IPR015500 Peptidase S8%2C subtilisin-related
Solyc11g073010	3.73827	1.60978e-09	9.00893e-09	Exocyst complex protein EXO70 (AHRD V1 *--- EXO70_KLULA)%3B contains Interpro domain(s) IPR004140 Exo70 exocyst complex subunit
Solyc07g007440	3.73265	1.5019e-07	6.45975e-07	Ring H2 finger protein (AHRD V1 ***- D9ZHD8_HYPPE)%3B contains Interpro domain(s) IPR018957 Zinc finger%2C C3HC4 RING-type
Solyc04g064880	3.73259	1.62551e-08	7.97768e-08	Pathogenesis-related protein-like protein (AHRD V1 ***- Q8L9B0_ARATH)
Solyc01g111590	3.73209	6.90984e-42	1.01418e-39	Histone-binding protein RBBP7 (AHRD V1 **-* B5X3G4_SALSA)%3B contains Interpro domain(s) IPR020472 G-protein beta WD-40 repeat%2C region
Solyc06g007440	3.72992	5.47592e-29	2.31182e-27	CBL-interacting protein kinase 16 (AHRD V1 **** A0MNK3_POPTR)%3B contains Interpro domain(s) IPR002290 Serine/threonine protein kinase
Solyc06g066630	3.72786	4.52633e-09	2.38035e-08	Membrane bound O-acyl transferase MBOAT (AHRD V1 **-- Q2HT39_MEDTR)
Solyc02g080640	3.72179	1.08128e-38	1.1542e-36	Phosphoadenosine phosphosulfate reductase (AHRD V1 *-** B7I7M3_ACIB5)%3B contains Interpro domain(s) IPR013766 Thioredoxin domain
Solyc09g011540	3.71937	4.34552e-14	4.22782e-13	Glutathione S-transferase-like protein (AHRD V1 **** A8DUB0_SOLLC)%3B contains Interpro domain(s) IPR004046 Glutathione S-transferase%2C C-terminal
Solyc03g098650	3.71912	2.61521e-16	3.23876e-15	ATFP3 (AHRD V1 *-*- B6U4D0_MAIZE)%3B contains Interpro domain(s) IPR006121 Heavy metal transport/detoxification protein
Solyc07g054950	3.71184	1.42036e-06	5.27773e-06	Cyclin D2 (AHRD V1 **** Q71FH0_WHEAT)%3B contains Interpro domain(s) IPR015451 Cyclin D
Solyc02g088100	3.70249	2.24582e-70	2.63701e-67	Expansin (AHRD V1 ***- Q9ZP31_SOLLC)%3B contains Interpro domain(s) IPR007112 Expansin 45%2C endoglucanase-like IPR007117 Pollen allergen/expansin%2C C-terminal
Solyc06g008510	3.70163	1.05757e-16	1.35994e-15	CDT1a protein (AHRD V1 ***- Q710F0_ARATH)%3B contains Interpro domain(s) IPR014939 DNA replication factor CDT1-like
Solyc06g050320	3.69913	1.72362e-05	5.36831e-05	HMG type nucleosome/chromatin assembly factor (AHRD V1 **-* Q6Z1Z2_ORYSJ)%3B contains Interpro domain(s) IPR009071 High mobility group%2C superfamily
Solyc06g066080	3.69362	2.26962e-12	1.79837e-11	Pentatricopeptide repeat-containing protein (AHRD V1 ***- D7LQC4_ARALY)%3B contains Interpro domain(s) IPR002885 Pentatricopeptide repeat
Solyc10g084670	3.69113	4.51073e-44	7.7746e-42	Eukaryotic translation initiation factor 3 subunit A (AHRD V1 ***- C0H9S0_SALSA)%3B contains Interpro domain(s) IPR000717 Proteasome component region PCI
Solyc01g100220	3.6876	4.80846e-14	4.66133e-13	GATA transcription factor 22 (AHRD V1 *-*- B6U513_MAIZE)%3B contains Interpro domain(s) IPR000679 Zinc finger%2C GATA-type
Solyc06g048930	3.67643	6.19001e-12	4.65353e-11	Two-component response regulator ARR3 (AHRD V1 **** B6TSM4_MAIZE)%3B contains Interpro domain(s) IPR001789 Signal transduction response regulator%2C receiver region
Solyc10g050510	3.67613	2.05742e-36	1.73331e-34	Unknown Protein (AHRD V1)
Solyc12g008680	3.67601	1.44994e-16	1.8393e-15	Meiotic nuclear division protein 1 homolog (AHRD V1 ***- C1C1M1_9MAXI)%3B contains Interpro domain(s) IPR005647 Meiotic nuclear division protein 1
Solyc03g116170	3.6756	3.01912e-51	9.00319e-49	Nucleosome assembly protein family (AHRD V1 **-- A9RDJ7_PHYPA)%3B contains Interpro domain(s) IPR002164 Nucleosome assembly protein (NAP)
Solyc06g060050	3.67362	1.78674e-10	1.1306e-09	Pentatricopeptide repeat-containing protein (AHRD V1 ***- D7M7B9_ARALY)%3B contains Interpro domain(s) IPR002885 Pentatricopeptide repeat
Solyc11g011330	3.67348	1.98285e-06	7.1873e-06	Cinnamyl alcohol dehydrogenase (AHRD V1 **** D1FWZ8_SOYBN)%3B contains Interpro domain(s) IPR002085 Alcohol dehydrogenase superfamily%2C zinc-containing
Solyc02g070540	3.67102	1.95016e-23	4.85911e-22
Solyc03g118310	3.66923	0.00203963	0.00432343	BHLH transcription factor (AHRD V1 *-** A9YWR2_MEDTR)%3B contains Interpro domain(s) IPR011598 Helix-loop-helix DNA-binding
Solyc05g012630	3.66903	1.35696e-11	9.80887e-11	Pentatricopeptide repeat-containing protein (AHRD V1 ***- D7MHD4_ARALY)%3B contains Interpro domain(s) IPR002885 Pentatricopeptide repeat
Solyc03g096190	3.66317	5.39429e-06	1.82238e-05	Receptor like kinase%2C RLK
Solyc09g061700	3.66148	4.75876e-18	7.0507e-17	Male sterility 5 family protein (Fragment) (AHRD V1 *--- B1Q393_BRAOT)%3B contains Interpro domain(s) IPR011990 Tetratricopeptide-like helical
Solyc04g082970	3.65306	2.38888e-18	3.63989e-17
Solyc03g114310	3.65205	1.83314e-16	2.30363e-15	Protein-tyrosine kinase 6 (AHRD V1 **** PTK6_HUMAN)%3B contains Interpro domain(s) IPR002290 Serine/threonine protein kinase
Solyc05g009120	3.65129	7.41033e-11	4.89514e-10
Solyc08g029000	3.64789	2.07863e-10	1.3004e-09	Lipoxygenase (AHRD V1 **** Q43191_SOLTU)%3B contains Interpro domain(s) IPR001246 Lipoxygenase%2C plant
Solyc06g007170	3.64643	7.08024e-24	1.8526e-22
Solyc01g087800	3.63938	1.36007e-15	1.56088e-14	Subtilisin-like protease (AHRD V1 **-- O82777_SOLLC)%3B contains Interpro domain(s) IPR015500 Peptidase S8%2C subtilisin-related
Solyc03g112880	3.63187	3.1877e-13	2.79455e-12	Fasciclin-like arabinogalactan protein 9 (AHRD V1 ***- A9XTL4_GOSHI)%3B contains Interpro domain(s) IPR000782 FAS1 domain
Solyc10g011960	3.63185	1.23844e-16	1.57847e-15	Unknown Protein (AHRD V1)
Solyc08g067320	3.62798	8.75577e-08	3.88968e-07	Chlorophyll a/b binding protein (AHRD V1 ***- Q41422_SOLTU)%3B contains Interpro domain(s) IPR001344 Chlorophyll A-B binding protein
Solyc03g032040	3.62539	3.34859e-23	8.04475e-22	MFS family major facilitator transporter D-xylose cation symporter (AHRD V1 *-** D4E1S5_SEROD)%3B contains Interpro domain(s) IPR016196 Major facilitator superfamily%2C general substrate transporter
Solyc03g119660	3.6115	9.52014e-10	5.48298e-09	Cell number regulator 1 (AHRD V1 *--- B6TZ45_MAIZE)%3B contains Interpro domain(s) IPR006461 Protein of unknown function Cys-rich
Solyc12g099000	3.60849	2.97159e-74	5.07521e-71	S-adenosylmethionine synthase (AHRD V1 ***- B8LFH4_IPOBA)%3B contains Interpro domain(s) IPR002133 S-adenosylmethionine synthetase
Solyc02g088390	3.60771	4.07608e-32	2.24567e-30	Blue copper-like protein (AHRD V1 *--- B8Y8A0_GOSHI)%3B contains Interpro domain(s) IPR003245 Plastocyanin-like
Solyc01g109690	3.60741	2.00217e-12	1.59385e-11	Myb family transcription factor (Fragment) (AHRD V1 **** D7KSM0_ARALY)%3B contains Interpro domain(s) IPR017884 SANT%2C eukarya
Solyc06g007130	3.60391	1.5064e-18	2.32928e-17	Omega-3 fatty acid desaturase (AHRD V1 **** A9LNM9_SOLLC)%3B contains Interpro domain(s) IPR005804 Fatty acid desaturase%2C type 1
Solyc01g110060	3.60205	8.74731e-15	9.21681e-14	Purple acid phosphatase (AHRD V1 **** Q84KZ2_TOBAC)%3B contains Interpro domain(s) IPR015914 Purple acid phosphatase%2C N-terminal
Solyc04g078120	3.59581	2.28013e-27	8.31782e-26	Arginine N-methyltransferase 2 (AHRD V1 **** B6UHM3_MAIZE)%3B contains Interpro domain(s) IPR002110 Ankyrin
Solyc02g089030	3.59474	4.11492e-08	1.91544e-07	AT1G74160 protein (Fragment) (AHRD V1 ***- B9DHP4_ARATH)
Solyc04g079360	3.58758	4.81853e-10	2.8784e-09	MYB transcription factor (AHRD V1 *-*- O23160_ARATH)%3B contains Interpro domain(s) IPR015495 Myb transcription factor
Solyc06g071330	3.5809	3.34756e-17	4.52776e-16	Nucleobase ascorbate transporter (AHRD V1 **-* B9I369_POPTR)%3B contains Interpro domain(s) IPR006043 Xanthine/uracil/vitamin C permease
Solyc09g008860	3.57946	8.17134e-20	1.42143e-18	Receptor like kinase%2C RLK
Solyc01g105920	3.57811	2.50225e-28	9.89678e-27	(E)-beta-ocimene synthase (AHRD V1 **** Q5CD81_CITUN)%3B contains Interpro domain(s) IPR005630 Terpene synthase%2C metal-binding domain
Solyc08g005240	3.5779	1.86589e-21	3.75718e-20	Lysine-specific demethylase 5B (AHRD V1 *--* KDM5B_HUMAN)%3B contains Interpro domain(s) IPR013129 Transcription factor jumonji
Solyc02g082830	3.56624	4.09271e-44	7.11942e-42	Phosphoserine aminotransferase (AHRD V1 **** B9H657_POPTR)%3B contains Interpro domain(s) IPR003248 Phosphoserine aminotransferase
Solyc11g066950	3.55742	1.20744e-20	2.26615e-19	Stress responsive A/B barrel domain family protein (AHRD V1 ***- D7HD13_VIBCH)%3B contains Interpro domain(s) IPR013097 Stress responsive alpha-beta barrel
Solyc11g071200	3.55525	4.99189e-10	2.96874e-09	Unknown Protein (AHRD V1)
Solyc08g006410	3.55459	4.45082e-09	2.34486e-08	UDP-glucose glucosyltransferase (AHRD V1 **** B6EWX8_LYCBA)%3B contains Interpro domain(s) IPR002213 UDP-glucuronosyl/UDP-glucosyltransferase
Solyc07g053530	3.55362	4.05541e-13	3.51425e-12	Fasciclin-like arabinogalactan protein 4 (AHRD V1 ***- A9XTK9_GOSHI)%3B contains Interpro domain(s) IPR000782 FAS1 domain
Solyc07g064650	3.53948	2.74576e-17	3.74616e-16	Arabidopsis thaliana genomic DNA chromosome 5 P1 clone MOK16 (AHRD V1 *--- Q9LYW2_ARATH)%3B contains Interpro domain(s) IPR007608 Protein of unknown function DUF584
Solyc02g092510	3.53572	1.35808e-37	1.25686e-35	UPF0553 protein C9orf64 (AHRD V1 **-- CI064_HUMAN)%3B contains Interpro domain(s) IPR019438 Protein of unknown function DUF2419
Solyc02g083790	3.53557	4.65717e-16	5.59785e-15	Thaumatin-like protein (AHRD V1 ***- Q9ZQY9_ARATH)%3B contains Interpro domain(s) IPR001938 Thaumatin%2C pathogenesis-related
Solyc01g006450	3.5323	1.77631e-59	9.26988e-57	Enoyl reductase (AHRD V1 ***- P93062_BRANA)%3B contains Interpro domain(s) IPR014358 Enoyl-[acyl-carrier-protein] reductase (NADH)
Solyc07g005870	3.53052	2.59943e-70	2.87268e-67	FAD dependent oxidoreductase (AHRD V1 ***- B9M683_GEOSF)%3B contains Interpro domain(s) IPR002938 Monooxygenase%2C FAD-binding
Solyc03g118410	3.52928	3.70814e-45	6.89751e-43	Acyl carrier protein (AHRD V1 ***- Q672Q9_SOLLC)%3B contains Interpro domain(s) IPR003231 Acyl carrier protein (ACP)
Solyc02g080560	3.52805	8.59429e-26	2.75061e-24	Unknown Protein (AHRD V1)
Solyc11g071550	3.5211	1.87944e-09	1.04403e-08	Glutamyl-tRNA(Gln) amidotransferase subunit A (AHRD V1 ***- Q81EC8_BACCR)%3B contains Interpro domain(s) IPR000120 Amidase signature enzyme
Solyc08g067330	3.52026	1.8697e-07	7.93808e-07	Chlorophyll a-b binding protein 3C-like (AHRD V1 ***- Q2XTE0_SOLTU)%3B contains Interpro domain(s) IPR001344 Chlorophyll A-B binding protein
Solyc09g011990	3.51867	8.2684e-08	3.68887e-07	Receptor like protein kinase (AHRD V1 **** Q39139_ARATH)%3B contains Interpro domain(s) IPR001220 Legume lectin%2C beta chain
Solyc07g056670	3.5148	0.000118624	0.000320983	Gibberellin 2-oxidase 2 (AHRD V1 ***- A0FK57_SOLLC)%3B contains Interpro domain(s) IPR005123 Oxoglutarate and iron-dependent oxygenase
Solyc12g044310	3.51317	1.4529e-09	8.16993e-09	Solute carrier family 15 member 4 (AHRD V1 **-- S15A4_XENLA)%3B contains Interpro domain(s) IPR000109 TGF-beta receptor%2C type I/II extracellular region
Solyc11g040340	3.51302	5.6284e-10	3.32623e-09	Endoglucanase 1 (AHRD V1 ***- B6U0P7_MAIZE)%3B contains Interpro domain(s) IPR008928 Six-hairpin glycosidase-like IPR012341 Six-hairpin glycosidase IPR018221 Glycoside hydrolase%2C family 9%2C active site IPR001701 Glycoside hydrolase%2C family 9
Solyc01g066640	3.51017	2.49105e-05	7.57148e-05
Solyc09g072810	3.50947	3.16785e-20	5.72253e-19	Receptor like kinase%2C RLK
Solyc06g074000	3.50942	6.18828e-43	9.6082e-41	Aspartic proteinase nepenthesin-2 (AHRD V1 **-- B6SJT4_MAIZE)%3B contains Interpro domain(s) IPR001461 Peptidase A1
Solyc05g009890	3.50634	3.20291e-09	1.7207e-08	Chloroplast nucleoid DNA binding protein-like (AHRD V1 **-* Q9LTW4_ARATH)%3B contains Interpro domain(s) IPR001461 Peptidase A1
Solyc03g062900	3.50418	1.13783e-32	6.57736e-31	Unknown Protein (AHRD V1)
Solyc02g063410	3.50374	7.66889e-11	5.0535e-10	Hydroxyproline-rich glycoprotein (AHRD V1 ***- A9YWR1_MEDTR)
Solyc03g111120	3.50203	1.91305e-19	3.23206e-18	Malate synthase (AHRD V1 ***- B9RAK0_RICCO)%3B contains Interpro domain(s) IPR001465 Malate synthase
Solyc06g009490	3.50149	2.45644e-33	1.54863e-31	Pentatricopeptide repeat-containing protein At5g27110 (AHRD V1 ***- PP398_ARATH)
Solyc08g075240	3.49663	2.91506e-05	8.75544e-05	Glucose-methanol-choline oxidoreductase (AHRD V1 ***- D6TF66_9CHLR)%3B contains Interpro domain(s) IPR012400 Long-chain fatty alcohol dehydrogenase
Solyc10g078370	3.49347	1.70693e-15	1.94234e-14	Auxin efflux carrier (AHRD V1 ***- D6RT09_SOLLC)%3B contains Interpro domain(s) IPR014024 Auxin efflux carrier%2C subgroup
Solyc06g069650	3.49323	8.43944e-08	3.75804e-07	Receptor like kinase%2C RLK
Solyc07g052180	3.4929	0.00253634	0.00528624	Unknown Protein (AHRD V1)
Solyc09g057630	3.48722	3.40161e-22	7.40511e-21	Glucan endo-1 3-beta-glucosidase A6 (AHRD V1 ***- B6TIF7_MAIZE)%3B contains Interpro domain(s) IPR000490 Glycoside hydrolase%2C family 17
Solyc04g082750	3.48289	2.602e-19	4.35685e-18	3-beta hydroxysteroid dehydrogenase/isomerase family protein (AHRD V1 **** D7LGC3_ARALY)%3B contains Interpro domain(s) IPR002225 3-beta hydroxysteroid dehydrogenase/isomerase
Solyc05g051010	3.48038	3.11375e-07	1.28173e-06	Dihydroflavonol 4-reductase family (AHRD V1 ***- D7LCI9_ARALY)%3B contains Interpro domain(s) IPR016040 NAD(P)-binding domain
Solyc07g045440	3.4782	2.42989e-21	4.84098e-20	Fasciclin-like arabinogalactan protein 19 (AHRD V1 ***- A9XTM4_GOSHI)%3B contains Interpro domain(s) IPR000782 FAS1 domain
Solyc06g064600	3.47236	4.31502e-08	2.00411e-07	Pentatricopeptide repeat-containing protein (AHRD V1 ***- D7M3D7_ARALY)%3B contains Interpro domain(s) IPR002885 Pentatricopeptide repeat
Solyc07g052310	3.4706	4.65959e-08	2.15403e-07	Unknown Protein (AHRD V1)
Solyc09g097930	3.46994	1.24059e-13	1.14475e-12	MazG nucleotide pyrophosphohydrolase (AHRD V1 ***- B1J275_PSEPW)%3B contains Interpro domain(s) IPR004518 NTP pyrophosphohydrolase MazG%2C putative catalytic core
Solyc07g049230	3.46205	1.42838e-69	1.49083e-66	Enzyme of the cupin superfamily (AHRD V1 ***- B6TP17_MAIZE)%3B contains Interpro domain(s) IPR014710 RmlC-like jelly roll fold
Solyc05g055880	3.45917	1.68666e-44	3.04685e-42	Nucleolar protein 5 (AHRD V1 ***- Q6P364_XENTR)%3B contains Interpro domain(s) IPR002687 Pre-mRNA processing ribonucleoprotein%2C binding region
Solyc06g068240	3.45573	2.93091e-26	9.88563e-25	Pyrophosphate-energized proton pump (AHRD V1 ***- B0SRX3_LEPBP)%3B contains Interpro domain(s) IPR004131 Inorganic H+ pyrophosphatase
Solyc09g011570	3.45503	6.87259e-07	2.67708e-06	Glutathione S-transferase-like protein (AHRD V1 **** A8DUB0_SOLLC)%3B contains Interpro domain(s) IPR004046 Glutathione S-transferase%2C C-terminal
Solyc08g066270	3.4535	1.74603e-07	7.445e-07	Receptor like kinase%2C RLK
Solyc01g100030	3.45203	1.29498e-24	3.61497e-23	Deoxyuridine 5%26apos-triphosphate nucleotidohydrolase (AHRD V1 ***- D0NVQ2_PHYIN)%3B contains Interpro domain(s) IPR008181 DeoxyUTP pyrophosphatase subfamily 1
Solyc01g006170	3.45162	1.31103e-56	5.86434e-54	rRNA processing protein ebna1-binding protein-related (AHRD V1 *--* C4QG91_SCHMA)%3B contains Interpro domain(s) IPR008610 Eukaryotic rRNA processing
Solyc05g005560	3.44379	3.6174e-36	2.98071e-34	BURP domain-containing protein (Fragment) (AHRD V1 *--- C1PI44_ARATH)%3B contains Interpro domain(s) IPR004873 BURP
Solyc02g081810	3.43949	3.60402e-53	1.23107e-50	tRNA pseudouridine synthase B (AHRD V1 *-*- TRUB_PELTS)%3B contains Interpro domain(s) IPR004802 Pseudouridine synthase%2C putative
Solyc08g082250	3.43516	2.93871e-43	4.75944e-41	Endoglucanase 1 (AHRD V1 ***- B6U0J0_MAIZE)%3B contains Interpro domain(s) IPR008928 Six-hairpin glycosidase-like IPR012341 Six-hairpin glycosidase IPR018221 Glycoside hydrolase%2C family 9%2C active site IPR001701 Glycoside hydrolase%2C family 9
Solyc03g095180	3.42997	3.7265e-40	4.66732e-38	Superoxide dismutase (AHRD V1 **** Q7YK44_SOLLC)%3B contains Interpro domain(s) IPR001189 Manganese/iron superoxide dismutase
Solyc11g007800	3.42911	8.55494e-31	4.14231e-29	Ribonuclease P/MRP protein subunit (AHRD V1 *--- A8NQR7_COPC7)%3B contains Interpro domain(s) IPR009723 Ribonuclease P/MRP%2C POP1
Solyc04g051660	3.42126	1.24967e-66	9.7823e-64	TPR repeat (AHRD V1 *-*- Q31KV9_SYNE7)%3B contains Interpro domain(s) IPR011990 Tetratricopeptide-like helical
Solyc03g114690	3.42105	2.25574e-16	2.80653e-15	Wd-40 repeat-containing protein (AHRD V1 *--- B8C836_THAPS)%3B contains Interpro domain(s) IPR017986 WD40 repeat%2C region
Solyc07g043170	3.41994	0.00118553	0.00264017	Glucosyltransferase (AHRD V1 **** Q8RU72_TOBAC)%3B contains Interpro domain(s) IPR002213 UDP-glucuronosyl/UDP-glucosyltransferase
Solyc06g082460	3.4199	1.63956e-06	6.01492e-06	Plant-specific domain TIGR01568 family protein (AHRD V1 *--- B6U561_MAIZE)%3B contains Interpro domain(s) IPR006458 Protein of unknown function DUF623%2C plant
Solyc03g005780	3.41784	1.28751e-29	5.7048e-28	Chlorophyll a-b binding protein 3C-like (AHRD V1 **** Q2XTE0_SOLTU)%3B contains Interpro domain(s) IPR001344 Chlorophyll A-B binding protein
Solyc02g080160	3.41642	7.13126e-16	8.37867e-15	Xyloglucan endotransglucosylase/hydrolase 1 (AHRD V1 **** C0IRG0_9ERIC)%3B contains Interpro domain(s) IPR016455 Xyloglucan endotransglucosylase/hydrolase
Solyc02g082190	3.41431	4.34588e-47	9.3846e-45	CTP synthase (AHRD V1 **** B6U7R1_MAIZE)%3B contains Interpro domain(s) IPR004468 CTP synthase
Solyc01g096260	3.40202	3.90781e-07	1.58703e-06	Unknown Protein (AHRD V1)
Solyc05g006420	3.39254	1.38756e-22	3.15595e-21	Two-component response regulator ARR3 (AHRD V1 *-** B6TSM4_MAIZE)%3B contains Interpro domain(s) IPR001789 Signal transduction response regulator%2C receiver region
Solyc08g079900	3.3909	8.98374e-22	1.87322e-20	Subtilisin-like protease (AHRD V1 **-- Q9LWA4_SOLLC)%3B contains Interpro domain(s) IPR015500 Peptidase S8%2C subtilisin-related
Solyc01g103650	3.38824	2.29261e-35	1.71599e-33	Hydrolase alpha/beta fold family (AHRD V1 **-- A4VRL9_PSEU5)%3B contains Interpro domain(s) IPR012020 AB-hydrolase YheT%2C putative
Solyc01g110580	3.38212	0.000290555	0.000732213	Auxin-induced SAUR-like protein (AHRD V1 **-- Q8S349_CAPAN)%3B contains Interpro domain(s) IPR003676 Auxin responsive SAUR protein
Solyc07g063740	3.37277	1.82022e-24	5.0215e-23	Ferredoxin-like (AHRD V1 ***- Q6EP30_ORYSJ)
Solyc03g120990	3.36522	1.94844e-13	1.75734e-12	Malic enzyme (AHRD V1 ***- O04935_SOLLC)%3B contains Interpro domain(s) IPR012302 Malic enzyme%2C NAD-binding
Solyc07g007920	3.364	7.81263e-09	3.99825e-08	Telomere-associated protein RIF1 (AHRD V1 *-*- RIF1_MOUSE)%3B contains Interpro domain(s) IPR016024 Armadillo-type fold
Solyc09g014490	3.36314	1.25305e-08	6.24761e-08	En/Spm-like transposon protein (AHRD V1 *--- O04210_ARATH)
Solyc08g077990	3.36306	1.69349e-21	3.42211e-20	Kinase like protein (AHRD V1 *-*- Q0WPK0_ARATH)%3B contains Interpro domain(s) IPR002290 Serine/threonine protein kinase
Solyc01g106620	3.36246	2.45055e-11	1.72623e-10	Pathogenesis-related protein 1a (AHRD V1 **-- Q00MX6_MALDO)%3B contains Interpro domain(s) IPR018244 Allergen V5/Tpx-1 related%2C conserved site
Solyc01g107730	3.3617	7.90385e-06	2.60143e-05	Cyclin (AHRD V1 ***- Q1XGF1_TOBAC)%3B contains Interpro domain(s) IPR006671 Cyclin%2C N-terminal
Solyc03g111130	3.35902	2.7917e-14	2.77794e-13	Malate synthase (AHRD V1 **** B9RAK0_RICCO)%3B contains Interpro domain(s) IPR006252 Malate synthase A
Solyc03g112240	3.3585	3.86123e-07	1.57015e-06	Unknown Protein (AHRD V1)
Solyc09g082660	3.35661	3.48533e-13	3.03705e-12	Caffeoyl-CoA O-methyltransferase (AHRD V1 **** A9X9L7_BAMOL)%3B contains Interpro domain(s) IPR002935 O-methyltransferase%2C family 3
Solyc03g083770	3.35584	2.1404e-06	7.71964e-06	Pectinesterase (AHRD V1 ***- C0PST8_PICSI)%3B contains Interpro domain(s) IPR006501 Pectinesterase inhibitor
Solyc10g079350	3.35168	1.29756e-11	9.41572e-11	UDP-glucosyltransferase HvUGT5876 (AHRD V1 ***- D3WYW1_HORVD)%3B contains Interpro domain(s) IPR002213 UDP-glucuronosyl/UDP-glucosyltransferase
Solyc09g090130	3.34871	6.95291e-17	9.14737e-16	Myb-related transcription factor (AHRD V1 **** A7ULI0_DATME)%3B contains Interpro domain(s) IPR015495 Myb transcription factor
Solyc03g117620	3.34853	1.56839e-09	8.79825e-09	Heat shock protein (AHRD V1 *-*- Q801X9_CARAU)%3B contains Interpro domain(s) IPR013126 Heat shock protein 70
Solyc03g117560	3.34527	2.74887e-15	3.06123e-14	Blue copper-like protein (AHRD V1 **-- B8Y8A0_GOSHI)%3B contains Interpro domain(s) IPR003245 Plastocyanin-like
Solyc10g083180	3.3438	9.53431e-17	1.23532e-15	Xanthoxin dehydrogenase (AHRD V1 **-* ABA2_ARATH)%3B contains Interpro domain(s) IPR002347 Glucose/ribitol dehydrogenase
Solyc01g080410	3.3418	1.41437e-27	5.28266e-26	Peptide methionine sulfoxide reductase msrB (AHRD V1 ***- B6T2C6_MAIZE)%3B contains Interpro domain(s) IPR002579 Methionine sulphoxide reductase B
Solyc02g083740	3.33976	6.75508e-08	3.05095e-07	Oligopeptide transporter 9 (AHRD V1 **** B6SVF4_MAIZE)%3B contains Interpro domain(s) IPR004648 Tetrapeptide transporter%2C OPT1/isp4
Solyc12g056600	3.33856	3.13677e-34	2.15074e-32	Short chain alcohol dehydrogenase (AHRD V1 **** O50038_TOBAC)%3B contains Interpro domain(s) IPR002347 Glucose/ribitol dehydrogenase
Solyc10g050880	3.33783	5.78456e-05	0.000165486	Gibberellin receptor GID1L2 (AHRD V1 **-- B6TIA5_MAIZE)%3B contains Interpro domain(s) IPR013094 Alpha/beta hydrolase fold-3
Solyc02g069770	3.33348	4.01047e-57	1.88362e-54	Guanine nucleotide-binding protein subunit beta-like protein (AHRD V1 *--* GBLP_CHLRE)%3B contains Interpro domain(s) IPR020472 G-protein beta WD-40 repeat%2C region
Solyc01g097270	3.33162	1.44765e-34	1.02244e-32	Chitinase (Fragment) (AHRD V1 *--- Q38777_ALLSA)%3B contains Interpro domain(s) IPR000726 Glycoside hydrolase%2C family 19%2C catalytic IPR001153 Barwin
Solyc02g063420	3.3285	2.91273e-17	3.96533e-16	Hydroxyproline-rich glycoprotein (AHRD V1 **-- A9YWR1_MEDTR)
Solyc12g043020	3.32688	3.63694e-59	1.84668e-56	Dihydroxy-acid dehydratase (AHRD V1 **** A6C1E8_9PLAN)%3B contains Interpro domain(s) IPR004404 Dihydroxy-acid dehydratase
Solyc11g009050	3.32249	2.82877e-36	2.35151e-34	F-box protein-like (AHRD V1 ***- Q67X80_ORYSJ)%3B contains Interpro domain(s) IPR001810 Cyclin-like F-box
Solyc03g071570	3.32123	8.29691e-35	5.94939e-33	Pectate lyase-like protein (AHRD V1 **** Q6U6I9_BRANA)%3B contains Interpro domain(s) IPR002022 Pectate lyase/Amb allergen
Solyc10g080390	3.31663	2.15253e-45	4.08481e-43	Serine/threonine protein kinase (AHRD V1 *-*- D8LPU9_ECTSI)%3B contains Interpro domain(s) IPR002290 Serine/threonine protein kinase
Solyc07g042990	3.31327	9.44449e-10	5.44275e-09	LRR receptor-like serine/threonine-protein kinase%2C RLP
Solyc02g080320	3.31215	7.95129e-54	2.81851e-51	Pseudouridine synthase family protein (AHRD V1 **** D7MEP4_ARALY)%3B contains Interpro domain(s) IPR006145 Pseudouridine synthase%2C RsuA and RluB/C/D/E/F
Solyc08g082620	3.30704	2.54843e-11	1.78981e-10	3-oxoacyl-(Acyl carrier protein) synthase II (AHRD V1 **** D6YNQ6_CHLT1)%3B contains Interpro domain(s) IPR017568 3-oxoacyl-[acyl-carrier-protein] synthase 2
Solyc10g052500	3.30697	2.23633e-14	2.25397e-13	Phenylcoumaran benzylic ether reductase 3 (AHRD V1 **** B9HRL7_POPTR)%3B contains Interpro domain(s) IPR008030 NmrA-like
Solyc08g074480	3.30496	2.03885e-13	1.83272e-12	Cortical cell-delineating protein (AHRD V1 **-- B6UGA2_MAIZE)%3B contains Interpro domain(s) IPR013770 Plant lipid transfer protein and hydrophobic protein%2C helical
Solyc08g066740	3.30304	5.08829e-23	1.19942e-21	CT099 (Fragment) (AHRD V1 *--- Q4KR02_SOLCI)%3B contains Interpro domain(s) IPR003245 Plastocyanin-like
Solyc04g011880	3.30261	1.58737e-13	1.44646e-12	Glutaredoxin (AHRD V1 ***- B9IBJ4_POPTR)%3B contains Interpro domain(s) IPR011905 Glutaredoxin-like%2C plant II
Solyc03g120080	3.3006	9.85423e-60	5.28947e-57	Periodic tryptophan protein 2 (AHRD V1 **-- D0MSR7_PHYIN)%3B contains Interpro domain(s) IPR020472 G-protein beta WD-40 repeat%2C region
Solyc03g005260	3.29205	3.28249e-50	8.93742e-48	Sulfate adenylyltransferase (AHRD V1 **** Q43183_SOLTU)%3B contains Interpro domain(s) IPR002650 ATP-sulfurylase
Solyc02g090990	3.29187	1.36562e-12	1.11113e-11	Serine/threonine-protein kinase 36 (AHRD V1 ***- STK36_PONAB)%3B contains Interpro domain(s) IPR002290 Serine/threonine protein kinase
Solyc11g011000	3.2914	8.00848e-06	2.63115e-05	Cysteine-rich repeat secretory protein 60 (AHRD V1 ***- CRR60_ARATH)%3B contains Interpro domain(s) IPR002902 Protein of unknown function DUF26
Solyc01g110130	3.28967	7.34691e-39	8.02479e-37	DNA replication licensing factor (AHRD V1 ***- Q2TZM7_ASPOR)%3B contains Interpro domain(s) IPR008047 MCM protein 4
Solyc03g119120	3.28591	2.74382e-16	3.38464e-15	Pentatricopeptide repeat-containing protein (AHRD V1 ***- D7M3D7_ARALY)%3B contains Interpro domain(s) IPR002885 Pentatricopeptide repeat
Solyc08g080650	3.28358	1.71283e-57	8.251e-55	Osmotin-like protein (Fragment) (AHRD V1 **-- Q8S4L1_SOLNI)%3B contains Interpro domain(s) IPR001938 Thaumatin%2C pathogenesis-related
Solyc03g005320	3.28159	5.97705e-15	6.40199e-14	Fatty acid elongase 3-ketoacyl-CoA synthase (AHRD V1 **** Q6DUV5_BRANA)%3B contains Interpro domain(s) IPR012392 Very-long-chain 3-ketoacyl-CoA synthase
Solyc02g089890	3.28134	2.37275e-33	1.50597e-31	NAD-dependent epimerase/dehydratase (AHRD V1 *-*- D3NY83_AZOS1)%3B contains Interpro domain(s) IPR016040 NAD(P)-binding domain
Solyc10g086150	3.27892	4.06659e-55	1.62551e-52	Single-stranded DNA binding protein (AHRD V1 **-* Q8W214_SOLTU)%3B contains Interpro domain(s) IPR000504 RNA recognition motif%2C RNP-1
Solyc02g083880	3.27615	1.21852e-08	6.08516e-08	Gibberellin-regulated protein 2 (AHRD V1 *--- B6SKV6_MAIZE)%3B contains Interpro domain(s) IPR003854 Gibberellin regulated protein
Solyc04g064750	3.27298	1.66525e-08	8.16201e-08	Pentatricopeptide repeat-containing protein (AHRD V1 ***- D7L7Q9_ARALY)%3B contains Interpro domain(s) IPR001563 Peptidase S10%2C serine carboxypeptidase
Solyc07g062100	3.27181	4.30197e-07	1.73548e-06	Bromodomain and PHD finger containing 1 (AHRD V1 *--- B2RRD7_MOUSE)%3B contains Interpro domain(s) IPR019787 Zinc finger%2C PHD-finger
Solyc03g110980	3.26844	1.87465e-07	7.95731e-07	Unknown Protein (AHRD V1)
Solyc04g076400	3.26775	2.67628e-10	1.65229e-09	Vernalization insensitive 3 (Fragment) (AHRD V1 *--- C4PFF9_BRARC)
Solyc08g065540	3.26444	0.00135441	0.0029806	Protein phosphatase-2C (AHRD V1 ***- O82470_MESCR)%3B contains Interpro domain(s) IPR015655 Protein phosphatase 2C
Solyc08g080890	3.26219	2.35356e-13	2.09655e-12	Copper-exporting ATPase (AHRD V1 **** C0X752_ENTFA)%3B contains Interpro domain(s) IPR006403 ATPase%2C P type%2C cation/copper-transporter
Solyc01g086690	3.2609	2.5017e-14	2.51334e-13	Double-strand-break repair protein rad21 (AHRD V1 *-*- D0NDK6_PHYIN)%3B contains Interpro domain(s) IPR006910 Rad21/Rec8 like protein%2C N-terminal
Solyc03g034000	3.25987	3.93537e-05	0.000115866	Transcription factor (AHRD V1 *-*- D6MKM4_9ASPA)%3B contains Interpro domain(s) IPR011598 Helix-loop-helix DNA-binding
Solyc05g014540	3.25891	3.80473e-22	8.23497e-21	DNA polymerase alpha subunit B family (AHRD V1 ***- D7KVM0_ARALY)%3B contains Interpro domain(s) IPR016722 DNA polymerase alpha%2C subunit B
Solyc10g078540	3.25749	2.48999e-62	1.67069e-59	H/ACA ribonucleoprotein complex subunit 1-like protein 1 (AHRD V1 *-*- B6TYV7_MAIZE)%3B contains Interpro domain(s) IPR007504 Gar1 protein RNA-binding region
Solyc07g018300	3.25717	2.32159e-15	2.60237e-14	Single-stranded DNA binding protein p30 subunit (AHRD V1 **** C5JUU5_AJEDS)%3B contains Interpro domain(s) IPR014646 Replication protein A%2C subunit RPA32
Solyc07g039570	3.25392	2.8114e-09	1.51993e-08	Transcription factor (AHRD V1 *--* Q9M4A8_MAIZE)%3B contains Interpro domain(s) IPR011598 Helix-loop-helix DNA-binding
Solyc07g065110	3.25279	1.2076e-08	6.03383e-08	Protease inhibitor/seed storage/lipid transfer protein family protein (AHRD V1 **-* D7MKH4_ARALY)%3B contains Interpro domain(s) IPR003612 Plant lipid transfer protein/seed storage/trypsin-alpha amylase inhibitor
Solyc09g065590	3.24304	6.21786e-12	4.6726e-11
Solyc01g098380	3.24115	4.43963e-41	6.08813e-39	Dihydrodipicolinate reductase family protein (AHRD V1 **** D7LKV2_ARALY)%3B contains Interpro domain(s) IPR011859 Dihydrodipicolinate reductase%2C plant
Solyc06g035530	3.2374	2.07836e-18	3.17706e-17	Gibberellin 20-oxidase-2 (AHRD V1 **** Q9ZPP3_SOLLC)%3B contains Interpro domain(s) IPR005123 Oxoglutarate and iron-dependent oxygenase
Solyc07g056530	3.23427	9.04318e-17	1.1733e-15	Organic anion transporter (AHRD V1 **-* B6U937_MAIZE)%3B contains Interpro domain(s) IPR004853 Protein of unknown function DUF250
Solyc12g044950	3.22434	6.47016e-08	2.92833e-07	Omega-6 fatty acid desaturase (AHRD V1 **** Q461Q1_HEVBR)%3B contains Interpro domain(s) IPR005804 Fatty acid desaturase%2C type 1
Solyc03g117860	3.22216	2.93712e-32	1.64716e-30	IBR finger domain protein (AHRD V1 **-- Q4WL53_ASPFU)%3B contains Interpro domain(s) IPR002867 Zinc finger%2C C6HC-type
Solyc09g014210	3.22053	3.99592e-19	6.55645e-18	Pentatricopeptide repeat-containing protein (AHRD V1 ***- D7L7R1_ARALY)%3B contains Interpro domain(s) IPR002885 Pentatricopeptide repeat
Solyc11g007690	3.21951	6.94947e-40	8.64634e-38	Pyruvate kinase (AHRD V1 **** A9P7U5_POPTR)%3B contains Interpro domain(s) IPR001697 Pyruvate kinase
Solyc01g108630	3.21934	1.05568e-09	6.05034e-09	Nitrite reductase (AHRD V1 ***- Q76KB0_TOBAC)%3B contains Interpro domain(s) IPR006067 Nitrite and sulphite reductase 4Fe-4S region
Solyc10g079320	3.21845	2.79161e-07	1.15647e-06	Glucosyltransferase-5 (AHRD V1 *-** Q8S9A4_PHAAN)%3B contains Interpro domain(s) IPR002213 UDP-glucuronosyl/UDP-glucosyltransferase
Solyc05g050350	3.21788	3.26162e-11	2.25867e-10	Cyclic nucleotide gated channel (AHRD V1 ***- A9CRE4_MALDO)%3B contains Interpro domain(s) IPR000595 Cyclic nucleotide-binding
Solyc04g053010	3.21763	3.57689e-10	2.16911e-09	Auxin-responsive protein (AHRD V1 ***- A8IXW9_BRACM)%3B contains Interpro domain(s) IPR003676 Auxin responsive SAUR protein
Solyc04g008600	3.21501	3.55058e-12	2.74844e-11	Chromosome segregation in meiosis protein 3 (AHRD V1 *--- C0NYU8_AJECG)%3B contains Interpro domain(s) IPR012923 Replication fork protection component Swi3
Solyc09g009550	3.21281	5.1967e-08	2.38705e-07	Hydrolase alpha/beta fold family protein (AHRD V1 **** D7LIQ3_ARALY)%3B contains Interpro domain(s) IPR000073 Alpha/beta hydrolase fold-1
Solyc02g083700	3.21191	6.40271e-05	0.000181566	Alpha-mannosidase (AHRD V1 **** Q9FKW9_ARATH)%3B contains Interpro domain(s) IPR011682 Glycosyl hydrolases 38%2C C-terminal
Solyc11g011020	3.20725	2.67203e-36	2.24104e-34	Receptor like kinase%2C RLK
Solyc09g062970	3.20396	0.00103579	0.00233159	Unknown Protein (AHRD V1)
Solyc01g067370	3.20394	4.06949e-15	4.42952e-14	Pollen-specific lysine-rich protein SBgLR (AHRD V1 *--- Q6JLA6_SOLTU)
Solyc03g119180	3.19923	4.91394e-07	1.9638e-06	Unknown Protein (AHRD V1)
Solyc10g080070	3.19843	1.02871e-36	8.82479e-35	GTP-binding family protein (AHRD V1 ***- D7LHA2_ARALY)%3B contains Interpro domain(s) IPR002917 GTP-binding protein%2C HSR1-related
Solyc02g084370	3.19666	7.87718e-06	2.5946e-05	Receptor like kinase%2C RLK
Solyc07g062550	3.19398	2.00421e-23	4.97398e-22	UDP-N-acetylglucosamine 1-carboxyvinyltransferase (AHRD V1 ***- B1XJX8_SYNP2)%3B contains Interpro domain(s) IPR005750 UDP-N-acetylglucosamine 1-carboxyvinyltransferase
Solyc03g120290	3.19304	4.65448e-18	6.90708e-17	Unknown Protein (AHRD V1)
Solyc07g052510	3.19281	5.99148e-08	2.72613e-07	Peroxidase (AHRD V1 **** Q07446_SOLLC)%3B contains Interpro domain(s) IPR002016 Haem peroxidase%2C plant/fungal/bacterial
Solyc04g072000	3.19228	1.04903e-21	2.16335e-20	Chitinase (AHRD V1 ***- D0QU15_LACSA)%3B contains Interpro domain(s) IPR016283 Glycoside hydrolase%2C family 19
Solyc03g119370	3.19143	1.0024e-05	3.24131e-05	MYB transcription factor (AHRD V1 *-*- Q9C9G7_ARATH)%3B contains Interpro domain(s) IPR015495 Myb transcription factor
Solyc01g097000	3.19129	3.86562e-25	1.13297e-23	Beta-D-glucosidase (AHRD V1 ***- Q7XAS3_GOSHI)%3B contains Interpro domain(s) IPR001764 Glycoside hydrolase%2C family 3%2C N-terminal
Solyc06g034140	3.18141	5.88611e-07	2.32511e-06	B3 domain-containing protein Os01g0234100 (AHRD V1 ***- Y1341_ORYSJ)%3B contains Interpro domain(s) IPR003340 Transcriptional factor B3
Solyc10g055400	3.18059	4.11371e-17	5.51243e-16	Unknown Protein (AHRD V1)
Solyc08g081170	3.18051	3.44232e-68	2.93958e-65	UDP-N-acetylmuramoyl-L-alanyl-D-glutamate--2 6-diaminopimelate ligase (AHRD V1 *-** D7UXP7_LISGR)%3B contains Interpro domain(s) IPR005761 UDP-N-acetylmuramoylalanyl-D-glutamate-2%2C6-diaminopimelate ligase
Solyc09g009950	3.17728	7.1229e-12	5.32927e-11	Pentatricopeptide repeat-containing protein (AHRD V1 ***- D7LAN3_ARALY)%3B contains Interpro domain(s) IPR002885 Pentatricopeptide repeat
Solyc07g053480	3.17411	1.39526e-19	2.38082e-18	Ras-related protein Rab-25 (AHRD V1 ***- RAB25_BOVIN)%3B contains Interpro domain(s) IPR015595 Rab11-related
Solyc12g096770	3.16899	4.86891e-26	1.59916e-24	Hydroxycinnamoyl CoA quinate transferase (AHRD V1 **-- D6BK25_CYNSC)%3B contains Interpro domain(s) IPR003480 Transferase
Solyc09g090610	3.16864	4.6421e-55	1.8169e-52	50S ribosomal protein L14 (AHRD V1 ***- RL14_DEHE1)%3B contains Interpro domain(s) IPR000218 Ribosomal protein L14b/L23e
Solyc07g054170	3.16825	1.24129e-09	7.04538e-09	Expansin B1 (AHRD V1 ***- C8CC40_RAPSA)%3B contains Interpro domain(s) IPR007117 Pollen allergen/expansin%2C C-terminal
Solyc08g005250	3.16777	1.45607e-13	1.3357e-12	Jumonji domain protein (AHRD V1 ***- B9MU66_POPTR)
Solyc11g069070	3.16745	3.1953e-46	6.45485e-44	Metal ion binding protein (AHRD V1 *-*- B6U064_MAIZE)%3B contains Interpro domain(s) IPR006121 Heavy metal transport/detoxification protein
Solyc02g088900	3.16597	1.97308e-30	9.26705e-29	Organic anion transporter (AHRD V1 **-* B6U937_MAIZE)%3B contains Interpro domain(s) IPR004853 Protein of unknown function DUF250
Solyc11g008850	3.16511	6.20074e-28	2.40192e-26	Serine protease (AHRD V1 **** D8UJN6_VOLCA)%3B contains Interpro domain(s) IPR015724 Serine endopeptidase DegP2
Solyc08g068490	3.16507	5.63467e-15	6.04561e-14	Indole-3-acetic acid-amido synthetase GH3.8 (AHRD V1 **** B6U4E2_MAIZE)%3B contains Interpro domain(s) IPR004993 GH3 auxin-responsive promoter
Solyc03g119990	3.16016	1.27769e-07	5.54237e-07	Hydrolase alpha/beta fold family protein (AHRD V1 **** D7KX74_ARALY)%3B contains Interpro domain(s) IPR000073 Alpha/beta hydrolase fold-1
Solyc09g082220	3.15783	1.22049e-07	5.31387e-07	Acetyltransferase GNAT family protein expressed (AHRD V1 ***- Q75GC2_ORYSJ)%3B contains Interpro domain(s) IPR016181 Acyl-CoA N-acyltransferase
Solyc03g083720	3.15741	1.35729e-10	8.71178e-10	Pectinesterase (AHRD V1 ***- C0PST8_PICSI)%3B contains Interpro domain(s) IPR006501 Pectinesterase inhibitor
Solyc02g076830	3.1558	1.28508e-06	4.80549e-06	S-locus-specific glycoprotein (Fragment) (AHRD V1 **-- Q84V84_CICIN)%3B contains Interpro domain(s) IPR001480 Curculin-like (mannose-binding) lectin
Solyc02g082180	3.15519	2.64622e-41	3.71003e-39	DNA replication licensing factor (AHRD V1 ***- Q2TWS7_ASPOR)%3B contains Interpro domain(s) IPR008049 MCM protein 6
Solyc01g090800	3.15167	8.73866e-20	1.51312e-18	Cyclin-dependent kinase (AHRD V1 **** A6YTD1_CUCME)%3B contains Interpro domain(s) IPR012389 Negative regulatory factor PREG
Solyc09g061930	3.14789	6.30793e-11	4.20984e-10	Receptor like kinase%2C RLK
Solyc04g053030	3.14099	8.74786e-07	3.35332e-06	Auxin-induced SAUR-like protein (AHRD V1 ***- Q8S348_CAPAN)%3B contains Interpro domain(s) IPR003676 Auxin responsive SAUR protein
Solyc01g111570	3.14045	1.19583e-18	1.87155e-17	Receptor-like kinase (AHRD V1 *-*- A7VM42_MARPO)%3B contains Interpro domain(s) IPR002290 Serine/threonine protein kinase
Solyc01g111420	3.13818	1.03648e-33	6.69151e-32	LOC734162 protein (Fragment) (AHRD V1 *-*- Q4KLD4_XENLA)%3B contains Interpro domain(s) IPR002143 Ribosomal protein L1
Solyc03g118510	3.13604	1.84399e-24	5.07432e-23	Receptor like kinase%2C RLK
Solyc03g111400	3.13082	5.33827e-09	2.78971e-08	Xanthine/uracil permease family protein (AHRD V1 ***- D7L9S9_ARALY)%3B contains Interpro domain(s) IPR006043 Xanthine/uracil/vitamin C permease
Solyc08g079850	3.12972	1.35672e-17	1.90783e-16	Subtilisin-like protease (AHRD V1 **-- Q9LWA3_SOLLC)%3B contains Interpro domain(s) IPR015500 Peptidase S8%2C subtilisin-related IPR000209 Peptidase S8 and S53%2C subtilisin%2C kexin%2C sedolisin
Solyc02g079790	3.12942	2.25561e-09	1.23546e-08	POT family domain containing protein expressed (AHRD V1 ***- D8L9H8_WHEAT)%3B contains Interpro domain(s) IPR007493 Protein of unknown function DUF538
Solyc02g085930	3.12686	2.7621e-10	1.70248e-09	Peroxidase (AHRD V1 **** Q0ZA68_9ROSI)%3B contains Interpro domain(s) IPR002016 Haem peroxidase%2C plant/fungal/bacterial
Solyc07g041970	3.124	2.96786e-21	5.87537e-20	Subtilisin-like protease (AHRD V1 **-- B6SZ82_MAIZE)%3B contains Interpro domain(s) IPR015500 Peptidase S8%2C subtilisin-related
Solyc03g111210	3.11591	3.48832e-19	5.7791e-18	Pentatricopeptide repeat-containing protein (AHRD V1 ***- D7MAN3_ARALY)%3B contains Interpro domain(s) IPR002885 Pentatricopeptide repeat
Solyc01g087540	3.11525	1.162e-25	3.65059e-24
Solyc10g084610	3.11323	1.69138e-38	1.7752e-36	60S ribosomal protein L23A (AHRD V1 ***- D7LV29_ARALY)%3B contains Interpro domain(s) IPR012678 Ribosomal protein L23/L15e%2C core
Solyc07g056650	3.11283	2.99114e-11	2.08282e-10	Interactor of constitutive active ROPs 1 (AHRD V1 ***- ICR1_ARATH)
Solyc02g087960	3.10842	1.71273e-23	4.30174e-22	MYB transcription factor (AHRD V1 **** Q9SN78_ARATH)%3B contains Interpro domain(s) IPR015495 Myb transcription factor
Solyc08g078080	3.1018	5.28884e-10	3.13147e-09	Pentatricopeptide repeat-containing protein (AHRD V1 ***- D7M3D7_ARALY)%3B contains Interpro domain(s) IPR002885 Pentatricopeptide repeat
Solyc11g022590	3.09379	2.58928e-14	2.59439e-13	Kunitz trypsin inhibitor 4 (Fragment) (AHRD V1 **** C1J5E0_POPBA)%3B contains Interpro domain(s) IPR002160 Proteinase inhibitor I3%2C Kunitz legume
Solyc07g005020	3.09266	2.20575e-34	1.54625e-32	DNA replication licensing factor (AHRD V1 ***- Q2UAJ0_ASPOR)%3B contains Interpro domain(s) IPR008048 MCM protein 5
Solyc03g083970	3.08875	3.57203e-47	7.89503e-45	IQ calmodulin-binding motif family protein (AHRD V1 **** B6TKK9_MAIZE)
Solyc03g111710	3.0847	2.61588e-17	3.57415e-16	Speckle-type POZ protein (AHRD V1 *--- SPOP_XENTR)%3B contains Interpro domain(s) IPR000197 Zinc finger%2C TAZ-type
Solyc02g070950	3.07931	1.02538e-24	2.88813e-23	Chlorophyll a/b binding protein (AHRD V1 **** Q41422_SOLTU)%3B contains Interpro domain(s) IPR001344 Chlorophyll A-B binding protein
Solyc01g067440	3.07871	4.63068e-09	2.43279e-08	Glutaredoxin (AHRD V1 ***- B9MZY7_POPTR)%3B contains Interpro domain(s) IPR011905 Glutaredoxin-like%2C plant II
Solyc01g005470	3.07414	8.99074e-18	1.29135e-16	Cell number regulator 10 (AHRD V1 **-- D9HP26_MAIZE)%3B contains Interpro domain(s) IPR006461 Protein of unknown function Cys-rich
Solyc01g108650	3.0737	1.11971e-49	2.96281e-47	Unknown Protein (AHRD V1)
Solyc12g056200	3.07172	2.19818e-07	9.23875e-07	Glycosyltransferase-like protein (AHRD V1 **-- D8RX86_SELML)%3B contains Interpro domain(s) IPR006740 Protein of unknown function DUF604
Solyc06g068910	3.07022	5.47984e-08	2.51158e-07	Receptor like kinase%2C RLK
Solyc04g072850	3.06571	5.90179e-32	3.20453e-30	Alpha-L-arabinofuranosidase/beta-D-xylosidase (AHRD V1 **** D9D7L0_MALDO)%3B contains Interpro domain(s) IPR001764 Glycoside hydrolase%2C family 3%2C N-terminal
Solyc10g086760	3.06477	8.27639e-31	4.0282e-29	Tubulin beta chain (AHRD V1 ***- B9HP96_POPTR)%3B contains Interpro domain(s) IPR002453 Beta tubulin
Solyc10g086530	3.05552	2.49392e-11	1.7548e-10	GRAS family transcription factor (AHRD V1 **-- B9HBM9_POPTR)%3B contains Interpro domain(s) IPR005202 GRAS transcription factor
Solyc03g006410	3.05251	3.15626e-10	1.93023e-09	Plant-specific domain TIGR01615 family protein (AHRD V1 ***- B6UDN7_MAIZE)%3B contains Interpro domain(s) IPR006502 Protein of unknown function DUF506%2C plant
Solyc04g008850	3.05204	1.29517e-10	8.33584e-10	Aspartic proteinase nepenthesin-1 (AHRD V1 **-- C0JA97_9ORYZ)%3B contains Interpro domain(s) IPR001461 Peptidase A1
Solyc06g069790	3.05052	0.000128929	0.000346671	Gibberellin-regulated protein (AHRD V1 **-- B4UW77_ARAHY)%3B contains Interpro domain(s) IPR003854 Gibberellin regulated protein
Solyc03g031460	3.0486	1.17973e-23	3.01544e-22	Pentatricopeptide repeat-containing protein (AHRD V1 ***- D7KN35_ARALY)%3B contains Interpro domain(s) IPR002885 Pentatricopeptide repeat
Solyc05g013220	3.04735	3.87126e-16	4.69828e-15	Fatty acid elongase 3-ketoacyl-CoA synthase (AHRD V1 **** Q6DUV6_BRANA)%3B contains Interpro domain(s) IPR012392 Very-long-chain 3-ketoacyl-CoA synthase
Solyc01g091170	3.04554	1.64078e-05	5.12645e-05	Agmatinase (AHRD V1 ***- Q1IPT1_ACIBL)%3B contains Interpro domain(s) IPR016160 Aldehyde dehydrogenase%2C conserved site IPR006035 Ureohydrolase
Solyc03g025270	3.04539	3.26095e-48	8.16847e-46	rRNA 2%26apos-O-methyltransferase fibrillarin (AHRD V1 ***- B6JX17_SCHJY)%3B contains Interpro domain(s) IPR000692 Fibrillarin
Solyc09g005250	3.04424	9.4666e-57	4.33778e-54	Mitochondrial carrier protein (AHRD V1 ***- C6HT14_AJECH)%3B contains Interpro domain(s) IPR002113 Adenine nucleotide translocator 1
Solyc09g008380	3.04236	3.88565e-07	1.57906e-06	Pectate lyase-like protein (AHRD V1 **** Q56XU8_ARATH)%3B contains Interpro domain(s) IPR002022 Pectate lyase/Amb allergen
Solyc10g007290	3.03958	5.042e-13	4.32333e-12	Phosphoenolpyruvate carboxylase (AHRD V1 ***- A6YM32_RICCO)%3B contains Interpro domain(s) IPR015813 Pyruvate/Phosphoenolpyruvate kinase%2C catalytic core IPR001449 Phosphoenolpyruvate carboxylase
Solyc09g008430	3.03262	5.84101e-05	0.000166923	CHY zinc finger family protein expressed (AHRD V1 ***- Q10RT9_ORYSJ)%3B contains Interpro domain(s) IPR008913 Zinc finger%2C CHY-type
Solyc12g008600	3.02692	7.00025e-06	2.32644e-05	Unknown Protein (AHRD V1)%3B contains Interpro domain(s) IPR010410 Protein of unknown function DUF1005
Solyc01g079500	3.02304	3.70153e-30	1.70443e-28	DNA replication licensing factor (AHRD V1 **** Q2U020_ASPOR)%3B contains Interpro domain(s) IPR008050 MCM protein 7
Solyc01g102330	3.01899	9.66858e-16	1.12473e-14	Acetyl xylan esterase A (AHRD V1 **-- D0TLQ4_9BACE)%3B contains Interpro domain(s) IPR005181 Protein of unknown function DUF303%2C acetylesterase putative
Solyc04g050170	3.01717	1.15595e-08	5.79117e-08	Receptor like kinase%2C RLK
Solyc09g008990	3.01664	3.52615e-14	3.46292e-13	Cellulose synthase-like A2 glycosyltransferase family 2 protein mannan synthase (AHRD V1 **-- A9RYS2_PHYPA)
Solyc08g005800	3.01546	2.19185e-30	1.02689e-28	Pectinacetylesterase like protein (Fragment) (AHRD V1 **-- Q56WP8_ARATH)%3B contains Interpro domain(s) IPR004963 Pectinacetylesterase
Solyc06g018110	3.01343	7.68458e-28	2.93435e-26	RNA binding protein (AHRD V1 *--* B6TYA4_MAIZE)%3B contains Interpro domain(s) IPR000504 RNA recognition motif%2C RNP-1
Solyc01g111550	3.01326	3.03228e-10	1.86107e-09	Protein MCM10 homolog (AHRD V1 *--- MCM10_XENTR)%3B contains Interpro domain(s) IPR015408 Zinc finger%2C Mcm10/DnaG-type
Solyc06g065970	3.00839	4.72001e-11	3.19894e-10	Cortical cell-delineating protein (AHRD V1 **-- B6UGA2_MAIZE)%3B contains Interpro domain(s) IPR013770 Plant lipid transfer protein and hydrophobic protein%2C helical
Solyc02g014430	3.00826	3.36788e-06	1.17936e-05	Equilibrative nucleoside transporter (AHRD V1 **** B9H200_POPTR)%3B contains Interpro domain(s) IPR002259 Delayed-early response protein/equilibrative nucleoside transporter
Solyc05g006550	3.00739	4.07608e-17	5.4698e-16	Microtubule-associated protein TORTIFOLIA1 (AHRD V1 *--- B6SS76_MAIZE)%3B contains Interpro domain(s) IPR011989 Armadillo-like helical
Solyc09g011850	3.00724	8.69326e-60	4.80354e-57	Fructokinase-like protein 1 (AHRD V1 ***- D9IWP2_SOLTU)%3B contains Interpro domain(s) IPR011611 Carbohydrate/purine kinase
Solyc03g005600	3.0021	3.96794e-31	2.00392e-29	Dehydration-responsive protein-like (AHRD V1 **-- Q653G1_ORYSJ)%3B contains Interpro domain(s) IPR004159 Protein of unknown function DUF248%2C methyltransferase putative
Solyc05g051270	2.99376	4.08028e-06	1.40581e-05	Cysteine-rich repeat secretory protein 60 (AHRD V1 ***- CRR60_ARATH)%3B contains Interpro domain(s) IPR002902 Protein of unknown function DUF26
Solyc02g062910	2.99345	2.92702e-44	5.13925e-42	Pentatricopeptide repeat-containing protein (AHRD V1 ***- D7MBF2_ARALY)%3B contains Interpro domain(s) IPR002885 Pentatricopeptide repeat
Solyc01g096550	2.9931	2.09474e-39	2.42925e-37	Protein arginine methyltransferase (AHRD V1 *-** C1E5H4_9CHLO)%3B contains Interpro domain(s) IPR013216 Methyltransferase type 11
Solyc11g007230	2.99291	4.68187e-07	1.87738e-06	Pentatricopeptide repeat-containing protein (AHRD V1 ***- D7LUH3_ARALY)%3B contains Interpro domain(s) IPR002885 Pentatricopeptide repeat
Solyc05g054610	2.98717	6.2193e-16	7.37173e-15	Histone H4 (AHRD V1 ***- B6T0P4_MAIZE)%3B contains Interpro domain(s) IPR001951 Histone H4
Solyc05g018880	2.98607	5.74986e-06	1.93277e-05	Polyamine oxidase (AHRD V1 **** A1CAV3_ASPCL)%3B contains Interpro domain(s) IPR002937 Amine oxidase
Solyc09g083080	2.98452	6.71507e-49	1.75217e-46	Nucleolar protein 5 (AHRD V1 ***- Q6P364_XENTR)%3B contains Interpro domain(s) IPR002687 Pre-mRNA processing ribonucleoprotein%2C binding region
Solyc10g085900	2.981	9.60981e-36	7.49127e-34	Tetratricopeptide TPR_2 repeat protein (AHRD V1 **-- B4B1G0_9CHRO)%3B contains Interpro domain(s) IPR011990 Tetratricopeptide-like helical
Solyc09g089530	2.97938	0.0123062	0.021979	Proteinase inhibitor I (AHRD V1 ***- Q3S484_SOLTU)%3B contains Interpro domain(s) IPR000864 Proteinase inhibitor I13%2C potato inhibitor I
Solyc09g091600	2.97865	3.20994e-14	3.16231e-13	Male sterility MS5 family protein (AHRD V1 **-- D7KE75_ARALY)%3B contains Interpro domain(s) IPR011990 Tetratricopeptide-like helical
Solyc03g112820	2.97397	6.51608e-36	5.23152e-34	U3 small nucleolar ribonucleoprotein protein MPP10 (AHRD V1 *-*- B0WQ74_CULQU)%3B contains Interpro domain(s) IPR012173 U3 small nucleolar ribonucleoprotein complex%2C subunit Mpp10p
Solyc12g095980	2.97285	2.80382e-14	2.78559e-13	Harpin-induced 1 (AHRD V1 **-- A2Q440_MEDTR)%3B contains Interpro domain(s) IPR010847 Harpin-induced 1
Solyc09g014480	2.9684	5.53126e-16	6.58112e-15	Polygalacturonase inhibitor protein (AHRD V1 ***- Q40160_SOLLC)%3B contains Interpro domain(s) IPR013210 Leucine-rich repeat%2C N-terminal
Solyc10g085550	2.96553	5.14342e-38	4.95535e-36	Enolase (AHRD V1 ***- C5J0G6_TOBAC)%3B contains Interpro domain(s) IPR000941 Enolase
Solyc09g009900	2.96526	2.2867e-09	1.24993e-08	Pollen-specific protein - like (AHRD V1 ***- O49527_ARATH)%3B contains Interpro domain(s) IPR013970 Replication factor A protein 3
Solyc03g078500	2.96461	7.60319e-08	3.40991e-07	UDP-glucuronosyltransferase (AHRD V1 **-* Q5UB81_ARATH)%3B contains Interpro domain(s) IPR002213 UDP-glucuronosyl/UDP-glucosyltransferase
Solyc04g074420	2.96073	1.21833e-06	4.57316e-06	Phi-1 protein (Fragment) (AHRD V1 **-- Q4LAX0_CAPCH)%3B contains Interpro domain(s) IPR006766 Phosphate-induced protein 1 conserved region
Solyc02g070390	2.95861	3.70199e-54	1.36371e-51	PTAC12 (AHRD V1 ***- D7LH29_ARALY)
Solyc03g097850	2.95856	3.87999e-11	2.65937e-10	Pentatricopeptide repeat-containing protein (AHRD V1 ***- D7M889_ARALY)%3B contains Interpro domain(s) IPR002885 Pentatricopeptide repeat
Solyc12g057060	2.95668	4.2247e-08	1.9641e-07	UDP-glucuronosyltransferase (AHRD V1 **-- Q5UB81_ARATH)%3B contains Interpro domain(s) IPR002213 UDP-glucuronosyl/UDP-glucosyltransferase
Solyc01g091370	2.95504	5.04826e-26	1.65229e-24	AT-hook motif nuclear localized protein 1 (AHRD V1 ***- Q8VYJ2_ARATH)%3B contains Interpro domain(s) IPR005175 Protein of unknown function DUF296
Solyc03g031800	2.95363	1.53937e-17	2.15019e-16	Xyloglucan endotransglucosylase/hydrolase 1 (AHRD V1 **** C0IRG0_9ERIC)%3B contains Interpro domain(s) IPR016455 Xyloglucan endotransglucosylase/hydrolase
Solyc01g068540	2.95001	4.42647e-10	2.65179e-09	Unknown Protein (AHRD V1)%3B contains Interpro domain(s) IPR017877 MYB-like
Solyc01g104070	2.9468	3.29335e-54	1.23744e-51	Importin beta (AHRD V1 **-- D2VK12_NAEGR)%3B contains Interpro domain(s) IPR011989 Armadillo-like helical
Solyc11g066930	2.94599	2.52938e-13	2.2436e-12	AT5G28150-like protein (Fragment) (AHRD V1 *-*- D6PS16_9BRAS)%3B contains Interpro domain(s) IPR008586 Protein of unknown function DUF868%2C plant
Solyc12g088530	2.9451	8.34103e-08	3.71686e-07	Cyclin A-like protein (AHRD V1 ***- Q40492_TOBAC)%3B contains Interpro domain(s) IPR015453 G2/mitotic-specific cyclin A
Solyc01g073820	2.9449	2.4808e-08	1.18956e-07	CHP-rich zinc finger protein-like (AHRD V1 **-- Q9FNE5_ARATH)%3B contains Interpro domain(s) IPR011424 C1-like
Solyc11g042610	2.94345	1.54586e-47	3.67622e-45	Ribosomal protein S5 (AHRD V1 ***- A8J2I5_CHLRE)%3B contains Interpro domain(s) IPR005716 Ribosomal protein S7%2C eukaryotic/archaeal
Solyc03g006310	2.94102	8.12405e-34	5.39316e-32	Unknown Protein (AHRD V1)
Solyc02g078760	2.94096	1.19657e-14	1.23652e-13	CK25 (AHRD V1 ***- Q1W1G0_TOBAC)
Solyc02g071470	2.94094	5.2241e-13	4.45967e-12	1-aminocyclopropane-1-carboxylate oxidase 1 (AHRD V1 **-* ACCO1_MALDO)%3B contains Interpro domain(s) IPR005123 Oxoglutarate and iron-dependent oxygenase
Solyc12g094460	2.93914	6.27344e-12	4.71248e-11	Laccase-2 (AHRD V1 **-- LAC2_ORYSJ)%3B contains Interpro domain(s) IPR001117 Multicopper oxidase%2C type 1
Solyc09g014160	2.93671	4.00079e-12	3.07666e-11	UPF0503 protein At3g09070%2C chloroplastic (AHRD V1 ***- U503A_ARATH)%3B contains Interpro domain(s) IPR008004 Protein of unknown function DUF740
Solyc01g091530	2.93516	1.97208e-27	7.23624e-26	Fasciclin-like arabinogalactan protein 13 (AHRD V1 ***- A9XTL8_GOSHI)%3B contains Interpro domain(s) IPR000782 FAS1 domain
Solyc10g050890	2.93378	6.94204e-07	2.70133e-06	Nitrite reductase (AHRD V1 ***- Q76G13_TOBAC)%3B contains Interpro domain(s) IPR006067 Nitrite and sulphite reductase 4Fe-4S region
Solyc11g006420	2.93375	2.08797e-13	1.8724e-12	5%26apos-nucleotidase cytosolic III (AHRD V1 ***- B2GUX5_RAT)%3B contains Interpro domain(s) IPR006434 HAD-superfamily hydrolase%2C subfamily IE
Solyc05g014130	2.93224	6.67841e-44	1.12024e-41	COP1-interacting protein 4 (AHRD V1 *--- Q9C5U5_ARATH)
Solyc12g100330	2.92986	3.30638e-31	1.68339e-29	Cytosine-specific methyltransferase (AHRD V1 **** B9GLJ3_POPTR)%3B contains Interpro domain(s) IPR001525 C-5 cytosine-specific DNA methylase
Solyc08g005090	2.92893	2.02314e-23	5.00774e-22	Unknown Protein (AHRD V1)
Solyc06g082070	2.9282	1.49913e-10	9.57637e-10
Solyc06g053490	2.92765	8.8826e-22	1.85419e-20	Unknown Protein (AHRD V1)%3B contains Interpro domain(s) IPR008560 Protein of unknown function DUF842%2C eukaryotic
Solyc08g081150	2.92645	1.20742e-41	1.75843e-39	GMP synthase (AHRD V1 ***- D3KZU2_9BACT)%3B contains Interpro domain(s) IPR001674 GMP synthase%2C C-terminal
Solyc04g058170	2.92451	2.52317e-10	1.56239e-09	Calmodulin-like protein (AHRD V1 ***- Q9ATP2_CENCI)%3B contains Interpro domain(s) IPR011992 EF-Hand type
Solyc11g005300	2.92212	0.0003735	0.000921706	Ring finger protein (AHRD V1 *-*- O49869_HORVU)%3B contains Interpro domain(s) IPR018957 Zinc finger%2C C3HC4 RING-type
Solyc01g099630	2.91389	6.12452e-18	8.98215e-17	Xyloglucan endotransglucosylase/hydrolase 5 (AHRD V1 **** C0IRG4_ACTDE)%3B contains Interpro domain(s) IPR016455 Xyloglucan endotransglucosylase/hydrolase IPR008263 Glycoside hydrolase%2C family 16%2C active site
Solyc08g081960	2.91199	2.40208e-15	2.68753e-14	Ethylene-responsive transcription factor 4 (AHRD V1 *-*- ERF4_NICSY)%3B contains Interpro domain(s) IPR001471 Pathogenesis-related transcriptional factor and ERF%2C DNA-binding
Solyc09g018010	2.91153	9.69946e-21	1.84624e-19	Non-specific lipid-transfer protein (AHRD V1 **** Q8H6L4_SOLTU)%3B contains Interpro domain(s) IPR013770 Plant lipid transfer protein and hydrophobic protein%2C helical
Solyc04g009900	2.90876	3.28874e-06	1.15444e-05	Calcium-dependent protein kinase 2 (AHRD V1 ***- B4FZS4_MAIZE)%3B contains Interpro domain(s) IPR002290 Serine/threonine protein kinase
Solyc06g072370	2.90874	4.0848e-17	5.47759e-16	GAGA-binding transcriptional activator (AHRD V1 ***- Q2PQS1_ARATH)%3B contains Interpro domain(s) IPR010409 GAGA binding-like
Solyc01g094360	2.90514	2.88992e-06	1.02227e-05	MYB transcription factor (AHRD V1 *-** Q6R098_ARATH)%3B contains Interpro domain(s) IPR015495 Myb transcription factor
Solyc02g070780	2.90446	6.76154e-23	1.57604e-21	DNA replication licensing factor MCM3 (AHRD V1 **** Q16NY8_AEDAE)%3B contains Interpro domain(s) IPR008046 MCM protein 3
Solyc06g008700	2.90434	6.88957e-51	1.93186e-48	tRNA (Guanine-N7-)-methyltransferase subunit Trm82 (AHRD V1 **-- B6K7X4_SCHJY)%3B contains Interpro domain(s) IPR017986 WD40 repeat%2C region
Solyc00g110870	2.89771	7.42112e-11	4.90055e-10	Receptor like kinase%2C RLK
Solyc09g007750	2.89747	1.03562e-16	1.33353e-15	Receptor-like kinase (AHRD V1 *-*- C6ZRP5_SOYBN)%3B contains Interpro domain(s) IPR002290 Serine/threonine protein kinase
Solyc00g272810	2.89691	1.29155e-06	4.8268e-06	N-acetyltransferase (AHRD V1 ***- B6SUK9_MAIZE)%3B contains Interpro domain(s) IPR000182 GCN5-related N-acetyltransferase
Solyc06g065430	2.89691	1.29155e-06	4.8268e-06	Cytochrome P450
Solyc10g005400	2.89592	1.03302e-21	2.13268e-20	Inositol oxygenase (AHRD V1 **** B9XK04_9BACT)%3B contains Interpro domain(s) IPR007828 Protein of unknown function DUF706
Solyc09g082450	2.8937	8.37181e-20	1.45496e-18	Pentatricopeptide repeat-containing protein (AHRD V1 ***- D7KMD0_ARALY)%3B contains Interpro domain(s) IPR002885 Pentatricopeptide repeat
Solyc08g007550	2.89368	1.71645e-06	6.28228e-06	Unknown Protein (AHRD V1)
Solyc11g070140	2.89165	2.10413e-16	2.62485e-15	Cell division protein kinase 2 (AHRD V1 ***- C1C4M4_RANCA)%3B contains Interpro domain(s) IPR002290 Serine/threonine protein kinase
Solyc10g083290	2.8883	6.28037e-24	1.6502e-22	Beta-fructofuranosidase insoluble isoenzyme 2 (AHRD V1 **-- B6U1H5_MAIZE)%3B contains Interpro domain(s) IPR018053 Glycoside hydrolase%2C family 32%2C active site IPR013148 Glycosyl hydrolases family 32%2C N-terminal IPR001362 Glycoside hydrolase%2C family 32
Solyc07g056160	2.88703	6.86988e-17	9.0508e-16	Cytochrome P450
Solyc04g074770	2.88368	4.9473e-14	4.79345e-13	Unknown Protein (AHRD V1)
Solyc09g011040	2.88335	1.49318e-10	9.54165e-10	Aspartic proteinase nepenthesin I (AHRD V1 **-- A9ZMF9_NEPAL)%3B contains Interpro domain(s) IPR001461 Peptidase A1
Solyc08g042100	2.87929	3.35957e-11	2.32215e-10	Armadillo/beta-catenin repeat family protein (AHRD V1 **-- D7MAU3_ARALY)%3B contains Interpro domain(s) IPR011989 Armadillo-like helical
Solyc04g079740	2.87763	1.12234e-30	5.33805e-29
Solyc10g084350	2.87723	1.17282e-44	2.16018e-42	60S ribosomal protein L4-B (L1) (AHRD V1 ***- Q8LA93_ARATH)%3B contains Interpro domain(s) IPR002136 Ribosomal protein L4/L1e
Solyc09g009010	2.87626	9.36738e-12	6.88517e-11	Cellulose synthase-like C1-2 glycosyltransferase family 2 protein (AHRD V1 **-* D8T077_SELML)
Solyc08g068610	2.87499	7.00027e-16	8.25057e-15	Decarboxylase family protein (AHRD V1 ***- B1ILJ6_CLOBK)%3B contains Interpro domain(s) IPR002129 Pyridoxal phosphate-dependent decarboxylase
Solyc04g078470	2.87386	1.45868e-10	9.33069e-10	Cyclin D3-1 (AHRD V1 ***- Q2ABE7_CAMSI)%3B contains Interpro domain(s) IPR015451 Cyclin D
Solyc07g041760	2.87344	1.99872e-29	8.7529e-28	F-box/LRR-repeat protein 14 (AHRD V1 ***- B5X325_SALSA)%3B contains Interpro domain(s) IPR006553 Leucine-rich repeat%2C cysteine-containing subtype
Solyc02g083490	2.87	0.00176874	0.00379983	Peroxidase (AHRD V1 **** A9PGX3_POPTR)%3B contains Interpro domain(s) IPR002016 Haem peroxidase%2C plant/fungal/bacterial
Solyc01g107190	2.86584	2.53034e-05	7.676e-05	LOB domain protein 38 (AHRD V1 *-*- D7LT02_ARALY)%3B contains Interpro domain(s) IPR004883 Lateral organ boundaries%2C LOB
Solyc06g083580	2.86402	4.1148e-30	1.87633e-28	Pectate lyase 1-27 (AHRD V1 **** B9TU35_9ROSI)%3B contains Interpro domain(s) IPR002022 Pectate lyase/Amb allergen
Solyc05g005690	2.86377	2.8854e-45	5.42079e-43	30S ribosomal protein S9 (AHRD V1 ***- C5JX04_AJEDS)%3B contains Interpro domain(s) IPR000754 Ribosomal protein S9
Solyc11g066840	2.86374	3.868e-37	3.47694e-35	Histone deacetylase-like protein (AHRD V1 *-*- Q3HVL4_SOLTU)
Solyc00g156980	2.86371	0.000822041	0.00188937	Choline dehydrogenase (AHRD V1 **-- A5L8M4_9GAMM)%3B contains Interpro domain(s) IPR008671 Lycopene beta and epsilon cyclase
Solyc02g090180	2.86043	1.08372e-28	4.41645e-27	Oligopeptidase (Protease II) (AHRD V1 **-- A6EDE8_9SPHI)%3B contains Interpro domain(s) IPR002470 Peptidase S9A%2C prolyl oligopeptidase
Solyc01g090970	2.85995	4.55506e-34	3.07827e-32	Cortical cell-delineating protein (AHRD V1 **-- B6UGA2_MAIZE)%3B contains Interpro domain(s) IPR013770 Plant lipid transfer protein and hydrophobic protein%2C helical
Solyc11g006070	2.85731	6.11646e-34	4.10393e-32	Peptidyl-prolyl cis-trans isomerase (AHRD V1 ***- B5LWR0_ZIZJJ)%3B contains Interpro domain(s) IPR002130 Peptidyl-prolyl cis-trans isomerase%2C cyclophilin-type
Solyc11g066130	2.8557	1.6378e-20	3.02551e-19	Thaumatin-like protein (AHRD V1 **-- D2KU75_CITJA)%3B contains Interpro domain(s) IPR017949 Thaumatin%2C conserved site IPR001938 Thaumatin%2C pathogenesis-related
Solyc10g018340	2.85545	0.000249183	0.000635801	Auxin responsive SAUR protein (AHRD V1 *-*- Q1SN26_MEDTR)%3B contains Interpro domain(s) IPR003676 Auxin responsive SAUR protein
Solyc03g095500	2.85475	4.12105e-08	1.91781e-07	Thioredoxin h-like protein (AHRD V1 ***- Q8H6X3_TOBAC)%3B contains Interpro domain(s) IPR015467 Thioredoxin%2C core
Solyc08g082160	2.85367	1.05717e-11	7.72806e-11	Unknown Protein (AHRD V1)
Solyc03g025700	2.85022	2.27011e-09	1.24195e-08	Pentatricopeptide repeat-containing protein (AHRD V1 ***- D7KHY5_ARALY)%3B contains Interpro domain(s) IPR002885 Pentatricopeptide repeat
Solyc03g005700	2.84834	3.52738e-19	5.83867e-18	Mitochondrial import receptor subunit TOM22 (AHRD V1 ***- B6U2X6_MAIZE)
Solyc09g009220	2.84788	3.81241e-54	1.37738e-51	Unknown Protein (AHRD V1)
Solyc06g084580	2.844	3.00521e-11	2.09107e-10	Pentatricopeptide repeat-containing protein (AHRD V1 ***- D7L7Q9_ARALY)%3B contains Interpro domain(s) IPR002885 Pentatricopeptide repeat
Solyc02g080770	2.84303	7.67418e-08	3.4401e-07	Unknown Protein (AHRD V1)
Solyc10g050520	2.84062	2.14567e-06	7.73719e-06	Unknown Protein (AHRD V1)
Solyc03g083560	2.83973	0.000128345	0.00034515	Expressed protein (Fragment) (AHRD V1 ***- B3VJP0_POPTN)%3B contains Interpro domain(s) IPR006766 Phosphate-induced protein 1 conserved region
Solyc04g056340	2.83755	3.58169e-27	1.28415e-25	Tyrosine phosphatase family protein (AHRD V1 **** B8N9Z8_ASPFN)%3B contains Interpro domain(s) IPR020428 Protein-tyrosine phosphatase%2C dual specificity phosphatase%2C eukaryotic
Solyc12g099260	2.83697	7.8589e-28	2.99483e-26	ATP citrate lyase a-subunit (AHRD V1 **** Q93YH4_LUPAL)%3B contains Interpro domain(s) IPR016141 Citrate synthase-like%2C core
Solyc12g017460	2.83665	9.55493e-29	3.90236e-27	GDSL esterase/lipase At1g28590 (AHRD V1 ***- GDL8_ARATH)%3B contains Interpro domain(s) IPR001087 Lipase%2C GDSL
Solyc06g053640	2.83639	1.57228e-08	7.73661e-08	Ring H2 finger protein (AHRD V1 *-*- D9ZHD8_HYPPE)%3B contains Interpro domain(s) IPR018957 Zinc finger%2C C3HC4 RING-type
Solyc11g005390	2.83619	3.27675e-09	1.75837e-08	Expressed protein (Fragment) (AHRD V1 ***- B3VWQ2_POPTN)
Solyc01g079570	2.83602	6.02167e-09	3.12166e-08	Beta xylosidase (AHRD V1 ***- Q6RXY3_FRAAN)%3B contains Interpro domain(s) IPR001764 Glycoside hydrolase%2C family 3%2C N-terminal
Solyc03g025190	2.83343	1.16744e-08	5.84249e-08	Multidrug resistance protein mdtK (AHRD V1 **-- MDTK_YERP3)%3B contains Interpro domain(s) IPR002528 Multi antimicrobial extrusion protein MatE
Solyc09g011420	2.8317	2.14164e-45	4.08481e-43	50S ribosomal protein L7Ae (AHRD V1 **-- B2WJB2_PYRTR)%3B contains Interpro domain(s) IPR004038 Ribosomal protein L7Ae/L30e/S12e/Gadd45
Solyc11g008810	2.83053	1.41342e-11	1.0177e-10	Beta-hexosaminidase b (AHRD V1 **** Q17BL1_AEDAE)%3B contains Interpro domain(s) IPR001540 Glycoside hydrolase%2C family 20
Solyc05g011860	2.82852	0.00242074	0.00505878	Sulfotransferase family protein (AHRD V1 **** D7LZW5_ARALY)%3B contains Interpro domain(s) IPR000863 Sulfotransferase
Solyc06g061230	2.82739	5.40388e-15	5.82459e-14	Unknown Protein (AHRD V1)%3B contains Interpro domain(s) IPR009632 Putative metallocarboxypeptidase inhibitor
Solyc04g051390	2.82701	6.13337e-08	2.78732e-07	Unknown Protein (AHRD V1)
Solyc11g040120	2.82514	3.73934e-36	3.06773e-34	DNA replication licensing factor (AHRD V1 ***- Q8JGR5_DANRE)%3B contains Interpro domain(s) IPR008045 MCM protein 2
Solyc05g010480	2.82418	8.74986e-41	1.14954e-38	U3 small nucleolar RNA-associated protein 15 homolog (AHRD V1 **-- B5X2W0_SALSA)%3B contains Interpro domain(s) IPR018983 U3 small nucleolar RNA-associated protein 15%2C C-terminal
Solyc01g079950	2.8231	3.04442e-07	1.25484e-06	Xylanase inhibitor (Fragment) (AHRD V1 **-- Q53IQ3_WHEAT)%3B contains Interpro domain(s) IPR001461 Peptidase A1
Solyc01g098100	2.82307	5.44339e-38	5.19111e-36	60S ribosome subunit biogenesis protein NIP7 (AHRD V1 ***- B4FKM9_MAIZE)%3B contains Interpro domain(s) IPR016686 Ribosome biogenesis factor%2C NIP7
Solyc07g006910	2.82279	5.27161e-16	6.2921e-15	Solute carrier family 35 member E3 (AHRD V1 **-- S35E3_DANRE)%3B contains Interpro domain(s) IPR004853 Protein of unknown function DUF250
Solyc01g096040	2.82035	6.16279e-18	9.03123e-17	Aspartic proteinase nepenthesin I (AHRD V1 **-- A9ZMF9_NEPAL)%3B contains Interpro domain(s) IPR001461 Peptidase A1
Solyc10g080940	2.81897	9.28488e-32	4.96966e-30	Tubulin beta chain (AHRD V1 ***- B9HNJ2_POPTR)%3B contains Interpro domain(s) IPR002453 Beta tubulin
Solyc02g093300	2.81861	1.09596e-24	3.0777e-23	DNA polymerase (AHRD V1 **** B9SC90_RICCO)%3B contains Interpro domain(s) IPR004578 DNA-directed DNA polymerase%2C family B%2C pol2
Solyc03g115200	2.81805	8.13783e-21	1.56325e-19	Glucan endo-1 3-beta-glucosidase 1 (AHRD V1 *-*- B6TW10_MAIZE)%3B contains Interpro domain(s) IPR012946 X8
Solyc10g009130	2.81617	8.65423e-16	1.01237e-14	Unknown Protein (AHRD V1)
Solyc04g078780	2.8145	1.31543e-39	1.57407e-37	WD repeat protein 18 (AHRD V1 **-- B0WSI0_CULQU)%3B contains Interpro domain(s) IPR020472 G-protein beta WD-40 repeat%2C region
Solyc02g090960	2.8129	0.00231242	0.00485076	Rapid alkalinization factor 3 (AHRD V1 ***- Q6TF27_SOLCH)%3B contains Interpro domain(s) IPR008801 Rapid ALkalinization Factor
Solyc11g071370	2.80977	2.19033e-10	1.36756e-09	Pentatricopeptide repeat-containing protein (AHRD V1 ***- D7L041_ARALY)%3B contains Interpro domain(s) IPR002885 Pentatricopeptide repeat
Solyc11g066820	2.80828	3.61528e-28	1.41796e-26	Cellulose synthase-like C6 glycosyltransferase family 2 (AHRD V1 **-- A6N4C3_PHYPA)%3B contains Interpro domain(s) IPR001173 Glycosyl transferase%2C family 2
Solyc11g072580	2.80702	2.11901e-10	1.32479e-09	Proton-dependent oligopeptide transport family protein (AHRD V1 **-- D7LMP9_ARALY)%3B contains Interpro domain(s) IPR000109 TGF-beta receptor%2C type I/II extracellular region
Solyc05g009990	2.80541	3.73894e-10	2.26227e-09	LRR receptor-like serine/threonine-protein kinase%2C RLP
Solyc03g116500	2.80364	4.1746e-16	5.04686e-15	Polygalacturonase (AHRD V1 ***- Q9M7D3_SOLLC)%3B contains Interpro domain(s) IPR000743 Glycoside hydrolase%2C family 28
Solyc08g006900	2.80241	3.68171e-55	1.50366e-52	Ribosomal protein L32 (AHRD V1 ***- Q45NI6_MEDSA)%3B contains Interpro domain(s) IPR001515 Ribosomal protein L32e
Solyc10g074560	2.80144	1.9776e-34	1.3915e-32	Nucleolar complex protein 4 homolog (AHRD V1 *--- D3PJK6_9MAXI)%3B contains Interpro domain(s) IPR005612 CCAAT-binding factor
Solyc02g080210	2.79809	1.56829e-11	1.12499e-10	Pectinesterase (AHRD V1 ***- B9RXQ4_RICCO)%3B contains Interpro domain(s) IPR000070 Pectinesterase%2C catalytic
Solyc01g110940	2.7958	5.06288e-18	7.47682e-17	Auxin-induced SAUR-like protein (AHRD V1 ***- Q8S351_CAPAN)%3B contains Interpro domain(s) IPR003676 Auxin responsive SAUR protein
Solyc01g097390	2.79424	4.22417e-13	3.65207e-12	Aldo/keto reductase family protein (AHRD V1 ***- D7KWQ9_ARALY)%3B contains Interpro domain(s) IPR001395 Aldo/keto reductase
Solyc01g080600	2.79235	2.71219e-11	1.89702e-10	Histone H3 (AHRD V1 ***- D8L9K7_WHEAT)%3B contains Interpro domain(s) IPR000164 Histone H3
Solyc05g009270	2.78993	7.41377e-12	5.52928e-11	Fatty acid elongase 3-ketoacyl-CoA synthase (AHRD V1 **** Q6DUV5_BRANA)%3B contains Interpro domain(s) IPR012392 Very-long-chain 3-ketoacyl-CoA synthase
Solyc06g084120	2.78758	1.49817e-17	2.09577e-16	Protein TIFY 4B (AHRD V1 ***- TIF4B_ARATH)%3B contains Interpro domain(s) IPR010399 Tify
Solyc01g105060	2.78757	3.10081e-51	9.10234e-49	(3R)-hydroxymyristoyl- (AHRD V1 ***- Q9LX13_ARATH)%3B contains Interpro domain(s) IPR010084 Beta-hydroxyacyl-(acyl-carrier-protein) dehydratase FabZ
Solyc03g006220	2.78637	1.06459e-19	1.82986e-18
Solyc04g079310	2.78125	1.28592e-55	5.49058e-53	RNA Binding Protein 47 (AHRD V1 **-* Q9LEB3_NICPL)%3B contains Interpro domain(s) IPR012677 Nucleotide-binding%2C alpha-beta plait
Solyc03g119070	2.78059	4.95513e-07	1.979e-06	Flap structure-specific endonuclease (AHRD V1 *--- FEN_PYRAE)%3B contains Interpro domain(s) IPR006084 DNA repair protein (XPGC)/yeast Rad
Solyc06g068300	2.78004	1.90225e-12	1.51946e-11	Unknown Protein (AHRD V1)
Solyc01g103470	2.77965	9.67123e-08	4.27073e-07	Unknown Protein (AHRD V1)
Solyc02g092830	2.77774	2.04982e-25	6.22131e-24	Unknown Protein (AHRD V1)
Solyc02g072010	2.77751	5.77301e-06	1.93917e-05	Pentatricopeptide repeat-containing protein (AHRD V1 ***- D7M9E6_ARALY)%3B contains Interpro domain(s) IPR002885 Pentatricopeptide repeat
Solyc10g045310	2.77387	6.02344e-41	8.02571e-39	Oxidoreductase/ transition metal ion binding protein (AHRD V1 **-- D7MCM0_ARALY)
Solyc01g088600	2.77331	5.82423e-44	9.94725e-42	PDE320 (AHRD V1 ***- D7L613_ARALY)
Solyc02g081680	2.77141	4.51546e-41	6.10302e-39	Nucleolar complex protein 2 homolog (AHRD V1 ***- C0H9R3_SALSA)%3B contains Interpro domain(s) IPR005343 Uncharacterised protein family UPF0120
Solyc01g065700	2.76989	1.16614e-06	4.38781e-06	Integrin-linked kinase-associated serine/threonine phosphatase 2C (AHRD V1 **** ILKAP_BOVIN)%3B contains Interpro domain(s) IPR015655 Protein phosphatase 2C
Solyc04g080200	2.76977	1.13434e-28	4.59284e-27	Unknown Protein (AHRD V1)
Solyc09g075590	2.76977	2.67423e-19	4.46981e-18	Unknown Protein (AHRD V1)
Solyc04g045530	2.76917	1.69248e-14	1.72902e-13	DNA primase large subunit (AHRD V1 **** B5X2T9_SALSA)%3B contains Interpro domain(s) IPR016558 DNA primase%2C large subunit%2C eukaryotic
Solyc02g014360	2.76862	3.90252e-18	5.81879e-17	Pentatricopeptide repeat-containing protein (AHRD V1 ***- D7L3A6_ARALY)%3B contains Interpro domain(s) IPR002885 Pentatricopeptide repeat
Solyc12g005450	2.76826	2.12014e-06	7.65246e-06	Receptor-like protein kinase At3g21340 (AHRD V1 ***- RLK6_ARATH)%3B contains Interpro domain(s) IPR002290 Serine/threonine protein kinase
Solyc12g010840	2.76548	8.61232e-49	2.21643e-46	Ketol-acid reductoisomerase (AHRD V1 ***- D7LW57_ARALY)%3B contains Interpro domain(s) IPR016206 Ketol-acid reductoisomerase%2C plant
Solyc03g005790	2.76543	7.00066e-08	3.15172e-07	Chlorophyll a/b-binding protein (AHRD V1 ***- Q41234_PINTH)%3B contains Interpro domain(s) IPR001344 Chlorophyll A-B binding protein
Solyc03g006050	2.76494	2.23351e-21	4.46869e-20	Leucine rich repeat family protein (AHRD V1 *--- Q1EP22_MUSBA)
Solyc09g065710	2.76493	3.01793e-06	1.06495e-05	Pentatricopeptide repeat-containing protein (AHRD V1 ***- D7LTQ4_ARALY)%3B contains Interpro domain(s) IPR002885 Pentatricopeptide repeat
Solyc02g092460	2.76483	1.62064e-09	9.06429e-09	Speckle-type POZ protein (AHRD V1 *--- B5X432_SALSA)%3B contains Interpro domain(s) IPR000197 Zinc finger%2C TAZ-type
Solyc06g076360	2.76369	9.06488e-41	1.18265e-38	Outer envelope membrane protein (AHRD V1 **-- Q31PR1_SYNE7)%3B contains Interpro domain(s) IPR005689 Chloroplast envelope protein translocase%2C IAP75
Solyc07g064600	2.76251	0.000435514	0.00106081	Endoribonuclease L-PSP family protein (AHRD V1 **-* D7LAZ0_ARALY)%3B contains Interpro domain(s) IPR019897 YjgF-like protein%2C conserved site
Solyc02g092430	2.76171	2.64996e-47	6.07132e-45	Ribosomal protein L26 (AHRD V1 ***- A8HMG7_CHLRE)%3B contains Interpro domain(s) IPR005756 Ribosomal protein L26%2C eukaryotic/archaeal
Solyc11g007730	2.76031	1.08575e-15	1.25681e-14	MTA/SAH nucleosidase / phosphatase (AHRD V1 *-*- C3G449_BACTU)%3B contains Interpro domain(s) IPR018017 Nucleoside phosphorylase%2C family 1
Solyc05g052810	2.75724	9.7371e-35	6.9292e-33	60S ribosomal protein L33-B (AHRD V1 *-*- B6T1L8_MAIZE)%3B contains Interpro domain(s) IPR001780 Ribosomal protein L35Ae
Solyc00g050430	2.7542	8.99694e-09	4.57073e-08	BHLH transcription factor (AHRD V1 *-*- A9YWR2_MEDTR)%3B contains Interpro domain(s) IPR011598 Helix-loop-helix DNA-binding
Solyc10g045490	2.75061	3.23935e-16	3.96725e-15	A_IG002N01.30 protein (Fragment) (AHRD V1 ***- O04624_ARATH)%3B contains Interpro domain(s) IPR001578 Peptidase C12%2C ubiquitin carboxyl-terminal hydrolase 1
Solyc01g008600	2.7501	3.59018e-09	1.91561e-08	Zinc finger CCCH domain-containing protein 53 (AHRD V1 ***- C3H53_ORYSJ)%3B contains Interpro domain(s) IPR000571 Zinc finger%2C CCCH-type
Solyc11g013310	2.74647	1.1301e-14	1.17105e-13	Auxin transporter-like protein 3 (AHRD V1 ***- B6TPT6_MAIZE)%3B contains Interpro domain(s) IPR013057 Amino acid transporter%2C transmembrane
Solyc10g079510	2.74592	1.03994e-09	5.96561e-09	Helicase-like protein (AHRD V1 *-*- Q383Z6_9TRYP)%3B contains Interpro domain(s) IPR013020 DNA helicase (DNA repair)%2C Rad3 type
Solyc01g107890	2.7459	1.3912e-23	3.52245e-22	Filament-like plant protein (Fragment) (AHRD V1 *-*- FPP_SOLLC)%3B contains Interpro domain(s) IPR008587 Protein of unknown function DUF869%2C plant
Solyc08g079020	2.74555	4.87059e-25	1.41428e-23	Adenine phosphoribosyltransferase-like protein (AHRD V1 **** Q8LG17_ARATH)%3B contains Interpro domain(s) IPR005764 Adenine phosphoribosyl transferase
Solyc07g052220	2.74517	1.78211e-14	1.81467e-13	Unknown Protein (AHRD V1)
Solyc01g074000	2.74492	1.85754e-10	1.17224e-09	Histone H3 (AHRD V1 ***- D8L9K7_WHEAT)%3B contains Interpro domain(s) IPR000164 Histone H3
Solyc03g019890	2.74299	5.97067e-26	1.93398e-24	Beta-galactosidase (AHRD V1 ***- A2JGX1_SOLLC)%3B contains Interpro domain(s) IPR001944 Glycoside hydrolase%2C family 35
Solyc02g089880	2.74125	4.67683e-06	1.59636e-05	Glycosyltransferase family GT8 protein (AHRD V1 ***- D0ECQ6_POPDE)%3B contains Interpro domain(s) IPR002495 Glycosyl transferase%2C family 8
Solyc08g083380	2.74076	1.16621e-38	1.23088e-36	Mitochondrial import inner membrane translocase subunit Tim13 (AHRD V1 ***- B4FYN0_MAIZE)%3B contains Interpro domain(s) IPR004217 Mitochondrial inner membrane translocase complex%2C Tim8/9/10/13-zinc finger-like
Solyc07g053950	2.74031	1.48218e-15	1.69687e-14	Unknown Protein (AHRD V1)
Solyc05g008300	2.73988	3.16588e-09	1.70227e-08	Unknown Protein (AHRD V1)
Solyc08g068600	2.73903	4.27125e-27	1.51977e-25	Decarboxylase family protein (AHRD V1 ***- B1ILJ6_CLOBK)%3B contains Interpro domain(s) IPR002129 Pyridoxal phosphate-dependent decarboxylase
Solyc03g112100	2.73887	3.65358e-13	3.17336e-12	Component of high affinity nitrate transporter (AHRD V1 **-* D2KTV0_LOTJA)%3B contains Interpro domain(s) IPR016605 Transporter%2C high affinity nitrate%2C Nar2
Solyc12g009520	2.73574	7.22257e-15	7.67046e-14	LRR receptor-like serine/threonine-protein kinase%2C RLP
Solyc05g051000	2.73574	3.33506e-48	8.24419e-46	40S ribosomal protein S13 (AHRD V1 ***- D7LRU2_ARALY)%3B contains Interpro domain(s) IPR012606 Ribosomal protein S13/S15%2C N-terminal
Solyc07g048100	2.73476	6.62887e-16	7.81774e-15	BRCA1 C Terminus domain containing protein expressed (AHRD V1 *-*- Q6ATS1_ORYSJ)%3B contains Interpro domain(s) IPR001357 BRCT
Solyc08g006740	2.7329	4.57723e-06	1.56464e-05	Decarboxylase family protein (AHRD V1 ***- B1ILJ6_CLOBK)%3B contains Interpro domain(s) IPR002129 Pyridoxal phosphate-dependent decarboxylase
Solyc05g012100	2.73185	9.10145e-52	2.84982e-49	Fructokinase-like protein 2 (AHRD V1 **-- D9IWP0_NICBE)%3B contains Interpro domain(s) IPR011611 Carbohydrate/purine kinase
Solyc10g079170	2.73024	1.76154e-13	1.5972e-12	Receptor like kinase%2C RLK
Solyc06g009800	2.73003	3.10236e-06	1.09289e-05	Pentatricopeptide repeat-containing protein (AHRD V1 ***- D7M9E6_ARALY)%3B contains Interpro domain(s) IPR002885 Pentatricopeptide repeat
Solyc01g100890	2.72938	0.000242533	0.000620433	MtN21 nodulin protein-like (AHRD V1 ***- B6TBZ6_MAIZE)%3B contains Interpro domain(s) IPR000620 Protein of unknown function DUF6%2C transmembrane
Solyc05g006450	2.72918	2.29997e-08	1.10879e-07	Serine carboxypeptidase (AHRD V1 ***- A8HP98_CHLRE)%3B contains Interpro domain(s) IPR001563 Peptidase S10%2C serine carboxypeptidase
Solyc12g011090	2.72689	7.54218e-09	3.87416e-08	Unknown Protein (AHRD V1)
Solyc09g092520	2.72685	3.00187e-12	2.34495e-11	Xyloglucan endotransglucosylase/hydrolase 8 (AHRD V1 **** C0IRG7_ACTDE)%3B contains Interpro domain(s) IPR016455 Xyloglucan endotransglucosylase/hydrolase
Solyc11g012570	2.72567	1.13594e-15	1.3141e-14	Pentatricopeptide repeat protein (AHRD V1 ***- D2STE4_GOSHI)%3B contains Interpro domain(s) IPR002885 Pentatricopeptide repeat
Solyc11g006700	2.72518	3.00187e-06	1.05988e-05	Pentatricopeptide repeat-containing protein (AHRD V1 ***- D7L3A6_ARALY)%3B contains Interpro domain(s) IPR002885 Pentatricopeptide repeat
Solyc03g114800	2.72318	1.9201e-07	8.13368e-07	Sulfotransferase family protein (AHRD V1 **** D7LZW5_ARALY)%3B contains Interpro domain(s) IPR000863 Sulfotransferase
Solyc11g065220	2.72305	2.12846e-17	2.93809e-16	Hexokinase 6 (AHRD V1 ***- Q6Q8A0_TOBAC)%3B contains Interpro domain(s) IPR001312 Hexokinase
Solyc09g057960	2.72123	2.33338e-10	1.45204e-09	Cysteine-rich receptor-like protein kinase (AHRD V1 ***- C6ZRS1_SOYBN)%3B contains Interpro domain(s) IPR002902 Protein of unknown function DUF26
Solyc06g076700	2.72069	6.83048e-10	4.00512e-09	UPF0503 protein At3g09070%2C chloroplastic (AHRD V1 *-*- U503A_ARATH)%3B contains Interpro domain(s) IPR008004 Protein of unknown function DUF740
Solyc01g098000	2.7193	1.20478e-35	9.27634e-34	Elongation factor-like protein (AHRD V1 ***- Q3HVL1_SOLTU)%3B contains Interpro domain(s) IPR014038 Translation elongation factor EF1B%2C beta and delta chains%2C guanine nucleotide exchange
Solyc02g077220	2.71682	1.99987e-13	1.80027e-12	Isoamyl acetate-hydrolyzing esterase (AHRD V1 **-- B6THH7_MAIZE)%3B contains Interpro domain(s) IPR001087 Lipase%2C GDSL
Solyc08g023640	2.71646	1.03983e-07	4.56644e-07	Pentatricopeptide repeat-containing protein (AHRD V1 ***- D7L3A6_ARALY)%3B contains Interpro domain(s) IPR002885 Pentatricopeptide repeat
Solyc04g049840	2.71631	1.21651e-40	1.56538e-38	CCR4-NOT transcription complex subunit 4 (AHRD V1 *--- Q5BKS6_XENTR)%3B contains Interpro domain(s) IPR003954 RNA recognition%2C region 1
Solyc02g067700	2.71599	1.65958e-06	6.08598e-06	RING finger protein (AHRD V1 *-*- C6EUD3_SOYBN)%3B contains Interpro domain(s) IPR018957 Zinc finger%2C C3HC4 RING-type
Solyc06g065210	2.71441	5.50073e-42	8.13719e-40	Neutral invertase like protein (AHRD V1 ***- Q67XD9_ARATH)%3B contains Interpro domain(s) IPR006937 Plant neutral invertase
Solyc08g079740	2.71429	1.58788e-13	1.44646e-12	Receptor like kinase%2C RLK
Solyc10g076500	2.71187	2.03695e-09	1.12388e-08	LRR receptor-like serine/threonine-protein kinase%2C RLP
Solyc07g064280	2.7115	1.92012e-32	1.09313e-30	Tryptophan synthase beta chain 1 (AHRD V1 **** Q0WUI8_ARATH)%3B contains Interpro domain(s) IPR006654 Tryptophan synthase%2C beta chain
Solyc08g066020	2.71077	1.36881e-11	9.89067e-11	Serine C-palmitoyltransferase like protein (AHRD V1 **-* Q94IB8_ARATH)%3B contains Interpro domain(s) IPR004839 Aminotransferase%2C class I and II
Solyc12g056660	2.70952	2.34126e-21	4.67929e-20	Mitochondrial carrier C12B10.09 (AHRD V1 ***- B6TYC7_MAIZE)%3B contains Interpro domain(s) IPR002067 Mitochondrial carrier protein
Solyc11g005350	2.70649	2.01909e-10	1.26653e-09	MtN21 nodulin protein-like (AHRD V1 ***- B6TBZ6_MAIZE)%3B contains Interpro domain(s) IPR000620 Protein of unknown function DUF6%2C transmembrane
Solyc12g019480	2.70611	2.76968e-10	1.70547e-09	Formin 3 (AHRD V1 *-*- D0QAN4_ARATH)%3B contains Interpro domain(s) IPR015425 Actin-binding FH2
Solyc02g065350	2.70605	2.80039e-14	2.78512e-13	B3 domain-containing transcription factor VRN1 (AHRD V1 *-** VRN1_ARATH)%3B contains Interpro domain(s) IPR003340 Transcriptional factor B3
Solyc02g081920	2.7051	1.1052e-45	2.16285e-43	Plastid ribulose-1 5 bisphosphate carboxylase/oxygenase large subunit N-methyltransferase-related protein (Fragment) (AHRD V1 *-*- A7KWL3_ARALP)%3B contains Interpro domain(s) IPR001214 SET
Solyc02g085750	2.70358	6.82878e-08	3.08247e-07	LuxR family transcriptional regulator (Fragment) (AHRD V1 *-*- D9ZBL8_9CARY)
Solyc09g005710	2.70312	3.59982e-08	1.68695e-07	Pentatricopeptide repeat-containing protein (AHRD V1 ***- D7L4A8_ARALY)%3B contains Interpro domain(s) IPR002885 Pentatricopeptide repeat
Solyc08g078030	2.70262	0.000376043	0.000927615	Hydroxycinnamoyl CoA shikimate/quinate hydroxycinnamoyltransferase (AHRD V1 *--- B9IMB9_POPTR)%3B contains Interpro domain(s) IPR003480 Transferase
Solyc07g008820	2.70031	2.87862e-16	3.54394e-15
Solyc09g072770	2.70017	2.43575e-10	1.51224e-09	mRNA clone RAFL22-93-M12 (Fragment) (AHRD V1 *-*- Q67ZI7_ARATH)
Solyc07g007750	2.69718	0.000154197	0.000409155	Defensin protein (AHRD V1 ***- B1N678_SOLLC)%3B contains Interpro domain(s) IPR008177 Gamma Purothionin
Solyc05g005150	2.69652	5.72256e-23	1.34387e-21	F-box/Kelch repeat-containing F-box family protein (AHRD V1 ***- C4PVT9_ARATH)%3B contains Interpro domain(s) IPR015915 Kelch-type beta propeller
Solyc11g011860	2.69561	2.33378e-09	1.27493e-08	Pentatricopeptide repeat-containing protein (AHRD V1 ***- D7L337_ARALY)%3B contains Interpro domain(s) IPR002885 Pentatricopeptide repeat
Solyc03g116840	2.69442	7.56614e-33	4.57058e-31	Pentatricopeptide repeat-containing protein (AHRD V1 *-*- D7KHY5_ARALY)%3B contains Interpro domain(s) IPR008906 HAT dimerisation
Solyc04g008040	2.693	2.632e-15	2.93457e-14	microtubule associated protein Type 1 (AHRD V1 **-* Q9C9X0_ARATH)%3B contains Interpro domain(s) IPR009768 Myosin II heavy chain-like
Solyc09g082170	2.69178	9.35804e-15	9.82176e-14	Pentatricopeptide repeat-containing protein (AHRD V1 ***- D7MBB4_ARALY)%3B contains Interpro domain(s) IPR002885 Pentatricopeptide repeat
Solyc12g045020	2.69065	4.9901e-11	3.37227e-10	Cytochrome P450
Solyc06g051300	2.68973	8.07356e-08	3.60452e-07	Genomic DNA chromosome 5 BAC clone F17P19 (AHRD V1 ***- Q9LTJ9_ARATH)%3B contains Interpro domain(s) IPR018607 Chromosome transmission fidelity protein 8
Solyc11g012980	2.68855	0.000286117	0.000722386	Ethylene-responsive transcription factor 9 (AHRD V1 *-*- ERF80_ARATH)%3B contains Interpro domain(s) IPR001471 Pathogenesis-related transcriptional factor and ERF%2C DNA-binding
Solyc04g009210	2.68841	2.35596e-10	1.46513e-09	Pentatricopeptide repeat-containing protein (AHRD V1 ***- D7LZR6_ARALY)%3B contains Interpro domain(s) IPR002885 Pentatricopeptide repeat
Solyc02g067930	2.68836	0.00203848	0.00432154	Glycerol-3-phosphate dehydrogenase (AHRD V1 **** B4FZV9_MAIZE)%3B contains Interpro domain(s) IPR017751 NAD-dependent glycerol-3-phosphate dehydrogenase%2C eukaryotic
Solyc06g007910	2.68698	0.000247223	0.0006314	Gibberellin regulated protein (AHRD V1 **-- Q2HRH3_MEDTR)%3B contains Interpro domain(s) IPR003854 Gibberellin regulated protein
Solyc06g066590	2.68564	1.11294e-05	3.5644e-05	Cell number regulator 10 (AHRD V1 **-- D9HP26_MAIZE)%3B contains Interpro domain(s) IPR006461 Protein of unknown function Cys-rich
Solyc03g006330	2.68336	2.35515e-21	4.70203e-20	LRR receptor-like serine/threonine-protein kinase%2C RLP
Solyc02g088850	2.68264	4.82241e-06	1.64217e-05	LOC100005105 protein (Fragment) (AHRD V1 *-*- A4QNR9_DANRE)%3B contains Interpro domain(s) IPR007491 Protein of unknown function DUF537
Solyc02g077650	2.68181	1.40848e-06	5.23568e-06	Pentatricopeptide repeat (AHRD V1 ***- A2Q513_MEDTR)%3B contains Interpro domain(s) IPR002885 Pentatricopeptide repeat
Solyc03g097160	2.6802	1.51166e-31	7.95505e-30	WD-40 repeat protein (AHRD V1 **-- B4AUL0_9CHRO)%3B contains Interpro domain(s) IPR020472 G-protein beta WD-40 repeat%2C region
Solyc02g076750	2.6797	1.15173e-15	1.33155e-14	Cathepsin B-like cysteine proteinase (AHRD V1 **-* CYSP_SCHMA)%3B contains Interpro domain(s) IPR013128 Peptidase C1A%2C papain
Solyc04g074450	2.67757	8.49908e-12	6.2863e-11	Phi-1 protein (Fragment) (AHRD V1 ***- Q4LAX0_CAPCH)%3B contains Interpro domain(s) IPR006766 Phosphate-induced protein 1 conserved region
Solyc08g079060	2.6775	1.71421e-12	1.37628e-11	Trehalose 6-phosphate phosphatase (AHRD V1 ***- D4QAK5_TOBAC)%3B contains Interpro domain(s) IPR003337 Trehalose-phosphatase
Solyc04g077510	2.67712	1.06547e-13	9.90937e-13	Growth regulating factor 1 (Fragment) (AHRD V1 *--- A6MZS4_ORYSI)%3B contains Interpro domain(s) IPR014977 WRC
Solyc04g054690	2.67629	1.53596e-20	2.84576e-19	Laccase 1a (AHRD V1 ***- B9IG56_POPTR)%3B contains Interpro domain(s) IPR017760 L-ascorbate oxidase%2C plants
Solyc01g103640	2.67356	8.9887e-07	3.43932e-06	A_IG002N01.30 protein (Fragment) (AHRD V1 ***- O04624_ARATH)%3B contains Interpro domain(s) IPR001578 Peptidase C12%2C ubiquitin carboxyl-terminal hydrolase 1
Solyc02g092050	2.66938	2.28367e-07	9.58303e-07	AP2-like ethylene-responsive transcription factor At1g16060 (AHRD V1 *-*- AP2L1_ARATH)%3B contains Interpro domain(s) IPR001471 Pathogenesis-related transcriptional factor and ERF%2C DNA-binding
Solyc01g094610	2.66765	5.83249e-06	1.95845e-05	Rop guanine nucleotide exchange factor 2 (AHRD V1 **-* ROGF2_ARATH)%3B contains Interpro domain(s) IPR005512 Rop nucleotide exchanger%2C PRONE
Solyc07g005930	2.66702	2.89387e-39	3.29498e-37	DNA-directed RNA polymerase (AHRD V1 **** B9IMA6_POPTR)%3B contains Interpro domain(s) IPR002092 DNA-directed RNA polymerase%2C bacteriophage type
Solyc09g011330	2.66608	7.20397e-08	3.23937e-07	Receptor protein kinase-like (AHRD V1 **** Q5QLM8_ORYSJ)%3B contains Interpro domain(s) IPR002290 Serine/threonine protein kinase
Solyc08g068680	2.66454	4.10309e-20	7.33442e-19	Decarboxylase family protein (AHRD V1 ***- B1ILJ6_CLOBK)%3B contains Interpro domain(s) IPR002129 Pyridoxal phosphate-dependent decarboxylase
Solyc01g097670	2.66383	8.49999e-14	8.00849e-13	Pentatricopeptide repeat-containing protein (AHRD V1 ***- D7MHD4_ARALY)%3B contains Interpro domain(s) IPR002885 Pentatricopeptide repeat
Solyc03g112750	2.66105	6.92687e-10	4.05661e-09	Leucine rich repeat containing proteins-like protein (AHRD V1 *--- B3G460_ADIVA)%3B contains Interpro domain(s) IPR003590 Leucine-rich repeat%2C ribonuclease inhibitor subtype
Solyc10g005540	2.66071	6.12493e-21	1.18996e-19	SAM-dependent methyltransferase (AHRD V1 ***- D2ELV5_PEDAC)%3B contains Interpro domain(s) IPR010719 Putative rRNA methylase
Solyc07g052230	2.6604	7.13649e-12	5.33731e-11	Laccase-22 (AHRD V1 **-- LAC22_ORYSJ)%3B contains Interpro domain(s) IPR001117 Multicopper oxidase%2C type 1
Solyc05g009100	2.66017	3.32542e-12	2.58373e-11	Receptor like kinase%2C RLK
Solyc07g008530	2.65749	9.82584e-30	4.38475e-28	Tyrosyl-tRNA synthetase (AHRD V1 ***- A4RSR2_OSTLU)%3B contains Interpro domain(s) IPR002307 Tyrosyl-tRNA synthetase%2C class Ib%2C bacterial/mitochondrial
Solyc05g005050	2.65725	2.46507e-05	7.49736e-05	Cysteine-rich receptor-like protein kinase (AHRD V1 ***- C6ZRS1_SOYBN)%3B contains Interpro domain(s) IPR002902 Protein of unknown function DUF26
Solyc03g044660	2.65635	5.54953e-38	5.26561e-36	Dihydrodipicolinate synthase 2 (AHRD V1 **** D7LCJ3_ARALY)%3B contains Interpro domain(s) IPR005263 Dihydrodipicolinate synthase subfamily
Solyc06g076640	2.65494	5.28469e-26	1.72068e-24	Tubulin beta chain (AHRD V1 ***- B9GKJ5_POPTR)%3B contains Interpro domain(s) IPR002453 Beta tubulin
Solyc12g013710	2.6545	3.30191e-08	1.55627e-07	Protochlorophyllide reductase (AHRD V1 ***- Q8LAV9_ARATH)%3B contains Interpro domain(s) IPR005979 Light-dependent protochlorophyllide reductase
Solyc02g080950	2.65446	8.21837e-14	7.76262e-13	Pentatricopeptide repeat-containing protein (AHRD V1 ***- D7M173_ARALY)%3B contains Interpro domain(s) IPR002885 Pentatricopeptide repeat
Solyc01g091490	2.65428	5.13567e-11	3.46441e-10	Unknown Protein (AHRD V1)
Solyc01g109700	2.65293	8.27551e-22	1.73324e-20	Transcription factor (AHRD V1 *-** D6MKM4_9ASPA)%3B contains Interpro domain(s) IPR011598 Helix-loop-helix DNA-binding
Solyc05g051640	2.65178	1.26581e-14	1.3052e-13	Receptor like kinase%2C RLK
Solyc09g007430	2.65061	4.05035e-33	2.51136e-31	Mitochondrial SBP40 (AHRD V1 **-- Q58J68_SOLTU)%3B contains Interpro domain(s) IPR012340 Nucleic acid-binding%2C OB-fold
Solyc04g012100	2.65047	2.76359e-08	1.31775e-07	Receptor like kinase%2C RLK
Solyc02g093610	2.64861	1.13639e-06	4.28788e-06	BCL-2 binding anthanogene-1 (AHRD V1 ***- B6STZ6_MAIZE)%3B contains Interpro domain(s) IPR000626 Ubiquitin
Solyc01g081300	2.64745	1.22416e-36	1.04065e-34	Phosphoribosylaminoimidazole-succinocarboxamide synthase (AHRD V1 **** Q6T7F0_TOBAC)%3B contains Interpro domain(s) IPR001636 SAICAR synthetase
Solyc02g070970	2.64549	4.75773e-12	3.63052e-11	Chlorophyll a/b binding protein (AHRD V1 **** Q41422_SOLTU)%3B contains Interpro domain(s) IPR001344 Chlorophyll A-B binding protein
Solyc03g115050	2.64259	3.59846e-16	4.39274e-15	Single-stranded DNA-binding replication protein A large subunit (AHRD V1 **** D2V0Z2_NAEGR)%3B contains Interpro domain(s) IPR004591 Replication factor-a protein 1 Rpa1
Solyc04g077140	2.64249	0.000469201	0.00113726	Unknown Protein (AHRD V1)%3B contains Interpro domain(s) IPR010410 Protein of unknown function DUF1005
Solyc12g098590	2.63671	6.38799e-11	4.26176e-10	UDP-glucosyltransferase family 1 protein (AHRD V1 ***- C6KI42_CITSI)%3B contains Interpro domain(s) IPR002213 UDP-glucuronosyl/UDP-glucosyltransferase
Solyc08g014430	2.63449	3.71245e-06	1.29039e-05	Formin 3 (AHRD V1 *-*- D0QAN4_ARATH)%3B contains Interpro domain(s) IPR015425 Actin-binding FH2
Solyc07g064970	2.63433	1.32556e-37	1.23283e-35	Microtubule-associated protein MAP65-1a (AHRD V1 **** Q9FEV9_TOBAC)%3B contains Interpro domain(s) IPR007145 MAP65/ASE1
Solyc04g078310	2.63417	1.00613e-05	3.25171e-05	Cyclin A-like protein (AHRD V1 ***- Q40492_TOBAC)%3B contains Interpro domain(s) IPR015453 G2/mitotic-specific cyclin A
Solyc10g061970	2.63331	6.03608e-12	4.54552e-11	60S ribosomal protein L37a (AHRD V1 ***- Q5GMM4_CAPCH)%3B contains Interpro domain(s) IPR002674 Ribosomal protein L37ae
Solyc11g072730	2.63193	8.51449e-25	2.40544e-23	DNA-directed RNA polymerase (AHRD V1 **** B9GIK9_POPTR)%3B contains Interpro domain(s) IPR015700 DNA-directed RNA polymerase III largest subunit
Solyc01g073700	2.63174	4.53015e-05	0.000131971	26S protease regulatory subunit 8 homolog (AHRD V1 *--- PRS8_ENCCU)%3B contains Interpro domain(s) IPR003959 ATPase%2C AAA-type%2C core
Solyc11g072820	2.63106	1.93539e-27	7.1155e-26	Kinesin-5 (AHRD V1 *-*- D2V727_NAEGR)%3B contains Interpro domain(s) IPR001752 Kinesin%2C motor region
Solyc04g076260	2.63031	1.1465e-20	2.16041e-19	Unknown Protein (AHRD V1)
Solyc04g016060	2.62973	6.69844e-06	2.23206e-05	Plant-specific domain TIGR01570 family protein (AHRD V1 ***- B6TX93_MAIZE)%3B contains Interpro domain(s) IPR006460 Protein of unknown function DUF617%2C plant
Solyc03g115990	2.62955	7.47918e-27	2.63624e-25	Malate dehydrogenase (AHRD V1 **** O48906_MEDSA)%3B contains Interpro domain(s) IPR010097 Malate dehydrogenase%2C NAD-dependent%2C eukaryotes and gamma proteobacteria
Solyc12g038980	2.6274	6.52169e-47	1.37666e-44	50S ribosomal protein L7Ae (AHRD V1 *--- RL7A_NANEQ)%3B contains Interpro domain(s) IPR004038 Ribosomal protein L7Ae/L30e/S12e/Gadd45
Solyc07g007250	2.62511	0.000713899	0.0016634	Metallocarboxypeptidase inhibitor (AHRD V1 ***- MCPI_SOLLC)%3B contains Interpro domain(s) IPR004231 Proteinase inhibitor I37%2C carboxypeptidase A
Solyc02g091700	2.62327	4.0718e-09	2.15424e-08	Hydroxyproline-rich glycoprotein (AHRD V1 ***- A9YWR1_MEDTR)
Solyc07g053540	2.62093	2.7509e-16	3.39115e-15	Fasciclin-like arabinogalactan protein 4 (AHRD V1 ***- A9XTK9_GOSHI)%3B contains Interpro domain(s) IPR000782 FAS1 domain
Solyc04g040130	2.61965	4.59097e-16	5.5218e-15	Omega-6 fatty acid desaturase (AHRD V1 **** Q461Q1_HEVBR)%3B contains Interpro domain(s) IPR005804 Fatty acid desaturase%2C type 1
Solyc08g076610	2.61797	2.44365e-10	1.51615e-09	Cell cycle checkpoint protein RAD1 (AHRD V1 **-- C1BZ21_ESOLU)%3B contains Interpro domain(s) IPR003021 Repair protein Rad1/Rec1
Solyc05g009470	2.61575	8.43152e-25	2.38559e-23	Alpha-glucosidase (AHRD V1 **** Q9LEC9_SOLTU)%3B contains Interpro domain(s) IPR000322 Glycoside hydrolase%2C family 31
Solyc01g097640	2.61423	3.13643e-38	3.15103e-36	Ribosome biogenesis protein BMS1 homolog (AHRD V1 *--- BMS1_HUMAN)%3B contains Interpro domain(s) IPR007034 Protein of unknown function DUF663
Solyc02g085020	2.6126	4.27127e-11	2.90951e-10	Dihydroflavonol 4-reductase (AHRD V1 **** Q6WG03_SOLTU)%3B contains Interpro domain(s) IPR016040 NAD(P)-binding domain
Solyc03g063030	2.61255	5.53969e-35	3.98752e-33	Amino acid transporter (AHRD V1 **** B9HLH9_POPTR)%3B contains Interpro domain(s) IPR013057 Amino acid transporter%2C transmembrane
Solyc06g073690	2.61061	2.62158e-11	1.83981e-10	Transducin family protein (AHRD V1 ***- D7LSI0_ARALY)
Solyc03g117080	2.6104	6.63196e-18	9.67349e-17	Mitochondrial glycoprotein family protein (AHRD V1 ***- D7KDK7_ARALY)%3B contains Interpro domain(s) IPR003428 Mitochondrial glycoprotein
Solyc03g093330	2.60936	1.04464e-12	8.64946e-12	Receptor like kinase%2C RLK
Solyc08g078650	2.60803	1.90142e-07	8.05819e-07	Glycosyl transferase family 8 glycogenin (AHRD V1 *--- D3TM56_GLOMM)%3B contains Interpro domain(s) IPR002495 Glycosyl transferase%2C family 8
Solyc01g094280	2.60527	4.15406e-41	5.74086e-39	FolD bifunctional protein (AHRD V1 ***- B6TJF9_MAIZE)%3B contains Interpro domain(s) IPR000672 Tetrahydrofolate dehydrogenase/cyclohydrolase
Solyc09g091390	2.60488	0.00109693	0.00245567	Unknown Protein (AHRD V1)
Solyc05g005060	2.60082	4.05899e-07	1.64275e-06	S-receptor kinase (AHRD V1 **** Q43393_BRANA)%3B contains Interpro domain(s) IPR002290 Serine/threonine protein kinase
Solyc05g014710	2.59816	0.000906784	0.00206655	Remorin family protein (AHRD V1 ***- D7KET1_ARALY)%3B contains Interpro domain(s) IPR005516 Remorin%2C C-terminal region
Solyc02g078850	2.59679	1.40827e-09	7.94035e-09	Unknown Protein (AHRD V1)
Solyc02g069970	2.59545	2.39302e-20	4.36482e-19	Pto-like%2C Serine/threonine kinase protein%2C resistance protein
Solyc04g063300	2.59534	1.03404e-07	4.54422e-07	Pentatricopeptide repeat-containing protein (AHRD V1 ***- D7LR64_ARALY)%3B contains Interpro domain(s) IPR002885 Pentatricopeptide repeat
Solyc08g075680	2.59467	1.76807e-11	1.25916e-10	Unknown Protein (AHRD V1)
Solyc09g092390	2.59463	2.35673e-28	9.4004e-27	Adenosylhomocysteinase (AHRD V1 **** Q2XTD0_SOLTU)%3B contains Interpro domain(s) IPR000043 S-adenosyl-L-homocysteine hydrolase
Solyc03g078290	2.59276	3.12892e-47	7.0823e-45	40S ribosomal protein S18 (AHRD V1 ***- B4G286_MAIZE)%3B contains Interpro domain(s) IPR001892 Ribosomal protein S13
Solyc01g014140	2.59255	3.25787e-10	1.98784e-09	Hcr9-9D (AHRD V1 ***- O50021_SOLPI)
Solyc03g078650	2.58865	1.93965e-09	1.07398e-08
Solyc08g014550	2.58763	2.42742e-43	4.03575e-41	Ribosomal L9-like protein (AHRD V1 ***- B3TLR1_ELAGV)%3B contains Interpro domain(s) IPR000702 Ribosomal protein L6
Solyc04g071900	2.58732	7.20473e-13	6.07247e-12	Peroxidase (AHRD V1 **** Q94IQ1_TOBAC)%3B contains Interpro domain(s) IPR002016 Haem peroxidase%2C plant/fungal/bacterial
Solyc06g008940	2.58715	2.45692e-37	2.21914e-35	Elongation factor Tu (AHRD V1 **** B9SFP0_RICCO)%3B contains Interpro domain(s) IPR004541 Translation elongation factor EFTu/EF1A%2C bacterial and organelle
Solyc10g085020	2.58687	9.15854e-31	4.40055e-29	Tubulin beta chain (AHRD V1 ***- B9HP96_POPTR)%3B contains Interpro domain(s) IPR002453 Beta tubulin
Solyc12g099280	2.58628	7.42955e-33	4.50254e-31	Pre-mRNA polyadenylation factor fip1 (AHRD V1 *-*- B6JX34_SCHJY)%3B contains Interpro domain(s) IPR007854 Fip1
Solyc11g011240	2.58525	7.90453e-10	4.59902e-09	Geranylgeranyl pyrophosphate synthase 1 (AHRD V1 ***- Q1A7T0_SOLLC)%3B contains Interpro domain(s) IPR000092 Polyprenyl synthetase
Solyc03g093610	2.58477	6.52318e-14	6.23035e-13	Ethylene responsive transcription factor 1b (AHRD V1 **** C0J9I8_9ROSA)%3B contains Interpro domain(s) IPR001471 Pathogenesis-related transcriptional factor and ERF%2C DNA-binding
Solyc04g074900	2.5839	1.96404e-10	1.23382e-09	40S ribosomal protein S21 (AHRD V1 ***- D7M5J1_ARALY)%3B contains Interpro domain(s) IPR001931 Ribosomal protein S21e
Solyc09g084450	2.58264	0.000156175	0.000413948	Chymotrypsin inhibitor-2 (AHRD V1 *-*- A8V3P8_HORVD)%3B contains Interpro domain(s) IPR000864 Proteinase inhibitor I13%2C potato inhibitor I
Solyc06g082870	2.582	1.80673e-44	3.23266e-42	60S ribosomal protein L5-1 (AHRD V1 ***- B6THG9_MAIZE)%3B contains Interpro domain(s) IPR005485 Ribosomal protein L5%2C eukaryotic
Solyc12g011350	2.58193	0.000160005	0.000423263	Unknown Protein (AHRD V1)
Solyc11g005440	2.5799	3.91598e-15	4.26985e-14	Limkain b1 (Lkap) (Fragment) (AHRD V1 *--- Q28FZ9_XENTR)%3B contains Interpro domain(s) IPR007491 Protein of unknown function DUF537
Solyc02g062380	2.57905	2.04717e-06	7.4133e-06	GATA transcription factor 9 (AHRD V1 *-*- B6STZ1_MAIZE)%3B contains Interpro domain(s) IPR000679 Zinc finger%2C GATA-type
Solyc05g007250	2.57786	2.29881e-42	3.45501e-40	Ribosomal protein (AHRD V1 ***- B3TM27_ELAGV)%3B contains Interpro domain(s) IPR001912 Ribosomal protein S4
Solyc05g008620	2.57676	4.69466e-06	1.60128e-05	DNA replication complex GINS protein psf3 (AHRD V1 ***- C5FUE7_NANOT)%3B contains Interpro domain(s) IPR010492 GINS complex%2C Psf3 component
Solyc11g071960	2.57625	9.27288e-15	9.74326e-14	FAD-linked sulfhydryl oxidase ALR (AHRD V1 *-*- C1BXP3_ESOLU)%3B contains Interpro domain(s) IPR006863 Erv1/Alr
Solyc02g085390	2.57554	1.60321e-07	6.86877e-07	Uncharacterized ATP-dependent helicase C25A8.01c (AHRD V1 **-* YFC1_SCHPO)%3B contains Interpro domain(s) IPR000330 SNF2-related
Solyc04g012050	2.57448	9.54937e-12	7.01345e-11	Ethylene responsive transcription factor 2a (AHRD V1 *-*- C0J9I7_9ROSA)%3B contains Interpro domain(s) IPR001471 Pathogenesis-related transcriptional factor and ERF%2C DNA-binding
Solyc03g119080	2.57372	4.8553e-22	1.04128e-20	Beta-glucosidase (AHRD V1 **** D7L7Z3_ARALY)%3B contains Interpro domain(s) IPR001360 Glycoside hydrolase%2C family 1
Solyc11g007500	2.57306	7.79021e-08	3.48774e-07	UDP-glucosyltransferase (AHRD V1 ***- Q8LKG3_STERE)%3B contains Interpro domain(s) IPR002213 UDP-glucuronosyl/UDP-glucosyltransferase
Solyc06g084430	2.57096	3.34664e-08	1.57617e-07	Histone H2A (AHRD V1 ***- A5BCX3_VITVI)%3B contains Interpro domain(s) IPR002119 Histone H2A
Solyc01g111660	2.57005	1.94257e-21	3.90322e-20	Aquaporin-like protein (AHRD V1 ***- Q8W1A8_PETHY)%3B contains Interpro domain(s) IPR012269 Aquaporin
Solyc02g065560	2.5683	1.58684e-10	1.00955e-09	Pentatricopeptide repeat-containing protein (AHRD V1 ***- D7LGC7_ARALY)%3B contains Interpro domain(s) IPR002885 Pentatricopeptide repeat
Solyc07g055060	2.56817	1.0911e-18	1.71106e-17	Phosphoenolpyruvate carboxylase 1 (AHRD V1 ***- O23946_GOSHI)%3B contains Interpro domain(s) IPR015813 Pyruvate/Phosphoenolpyruvate kinase%2C catalytic core IPR001449 Phosphoenolpyruvate carboxylase
Solyc02g086600	2.56704	1.92657e-28	7.71737e-27	Polyribonucleotide nucleotidyltransferase (AHRD V1 ***- Q1PVN2_9BACT)%3B contains Interpro domain(s) IPR012162 Polyribonucleotide nucleotidyltransferase
Solyc01g099990	2.56389	6.60933e-06	2.20471e-05	F-box protein PP2-B1 (AHRD V1 ***- PP2B1_ARATH)%3B contains Interpro domain(s) IPR001810 Cyclin-like F-box
Solyc08g066530	2.56357	6.58563e-22	1.39329e-20	Acid phosphatase-like protein (AHRD V1 **-- Q9M0F5_ARATH)%3B contains Interpro domain(s) IPR010028 Acid phosphatase%2C plant
Solyc02g069070	2.56005	3.10319e-11	2.15685e-10	Ribonuclease H2 subunit C (AHRD V1 ***- C0H7J5_SALSA)%3B contains Interpro domain(s) IPR013924 Ribonuclease H2%2C subunit C
Solyc08g076190	2.55817	2.84102e-07	1.17538e-06	Genomic DNA chromosome 5 P1 clone MRA19 (AHRD V1 *--- Q9FK80_ARATH)
Solyc03g115640	2.55551	4.36493e-24	1.16483e-22
Solyc12g014430	2.55487	1.36097e-12	1.1083e-11	Cellulose synthase (AHRD V1 ***- B9H2F9_POPTR)%3B contains Interpro domain(s) IPR005150 Cellulose synthase
Solyc02g086470	2.55444	2.73191e-09	1.47807e-08	WD repeat protein (AHRD V1 **-- B8MBM8_TALSN)%3B contains Interpro domain(s) IPR020472 G-protein beta WD-40 repeat%2C region
Solyc09g065570	2.55293	6.75028e-08	3.04996e-07	Serine/threonine kinase (AHRD V1 *-** C4QNN2_SCHMA)%3B contains Interpro domain(s) IPR002290 Serine/threonine protein kinase
Solyc02g087610	2.55132	1.43407e-06	5.32343e-06	Pentatricopeptide repeat-containing protein (AHRD V1 ***- D7LM18_ARALY)%3B contains Interpro domain(s) IPR002885 Pentatricopeptide repeat
Solyc05g005540	2.54923	1.24381e-05	3.9559e-05	BURP domain-containing protein (Fragment) (AHRD V1 *--- C1PI44_ARATH)%3B contains Interpro domain(s) IPR004873 BURP
Solyc04g008820	2.54911	3.53696e-12	2.73903e-11	HMG transcription factor (Fragment) (AHRD V1 *--* Q676W2_HYAOR)%3B contains Interpro domain(s) IPR000910 High mobility group%2C HMG1/HMG2
Solyc12g010350	2.54907	1.89618e-33	1.21169e-31	60S ribosomal protein L39 (AHRD V1 ***- D3GC11_9ROSI)%3B contains Interpro domain(s) IPR000077 Ribosomal protein L39e
Solyc05g056390	2.54906	9.03788e-39	9.75832e-37	chaperonin (AHRD V1 ***- O24186_ORYSA)%3B contains Interpro domain(s) IPR001476 Chaperonin Cpn10
Solyc03g007800	2.54856	2.57443e-16	3.19246e-15	Topoisomerase 1-associated factor 1 (AHRD V1 *--- C9S978_VERA1)%3B contains Interpro domain(s) IPR007725 Timeless C-terminal
Solyc12g098850	2.5477	6.38842e-44	1.08126e-41	Soluble diacylglycerol acyltransferase (AHRD V1 *-*- B9S020_RICCO)%3B contains Interpro domain(s) IPR012336 Thioredoxin-like fold
Solyc07g006010	2.5471	1.08584e-17	1.54427e-16	Nucleoporin Nup43 (AHRD V1 *-*- NUP43_HUMAN)%3B contains Interpro domain(s) IPR011046 WD40 repeat-like
Solyc04g079520	2.54392	1.90671e-13	1.72218e-12	Peptide transporter (AHRD V1 **-* A6YJX4_9MAGN)%3B contains Interpro domain(s) IPR000109 TGF-beta receptor%2C type I/II extracellular region
Solyc09g089930	2.54365	4.3305e-06	1.48625e-05	Ethylene responsive transcription factor 1a (AHRD V1 *-** C0J9I9_9ROSA)%3B contains Interpro domain(s) IPR001471 Pathogenesis-related transcriptional factor and ERF%2C DNA-binding
Solyc09g006010	2.54363	5.03216e-05	0.000145557	Pathogenesis related protein PR-1 (AHRD V1 ***- Q9SC15_SOLTU)%3B contains Interpro domain(s) IPR001283 Allergen V5/Tpx-1 related
Solyc02g081910	2.54302	8.08752e-40	9.99607e-38	DNA topoisomerase (AHRD V1 **** B9SPT5_RICCO)%3B contains Interpro domain(s) IPR005733 DNA topoisomerase I%2C bacterial-type
Solyc02g070650	2.54272	3.2884e-43	5.23552e-41	60S ribosomal protein L18a (AHRD V1 ***- D2D962_9ROSI)%3B contains Interpro domain(s) IPR002670 Ribosomal protein L18ae
Solyc01g016470	2.54212	5.1968e-41	6.97373e-39	Unknown Protein (AHRD V1)%3B contains Interpro domain(s) IPR001813 Ribosomal protein 60S
Solyc02g091920	2.54148	3.50748e-16	4.28725e-15	Xyloglucan endotransglucosylase/hydrolase 2 (AHRD V1 **** Q2MK81_9ROSA)%3B contains Interpro domain(s) IPR016455 Xyloglucan endotransglucosylase/hydrolase
Solyc07g062440	2.54118	1.77648e-39	2.09904e-37	Genomic DNA chromosome 3 TAC clone K15M2 (AHRD V1 ***- Q9LKB4_ARATH)
Solyc03g095220	2.54078	3.32272e-46	6.57093e-44	Translocase of chloroplast 34 (AHRD V1 **-- B6TBT7_MAIZE)%3B contains Interpro domain(s) IPR006703 AIG1
Solyc07g041310	2.54059	1.60563e-45	3.10979e-43	Ribosomal protein (AHRD V1 ***- B3TLR8_ELAGV)%3B contains Interpro domain(s) IPR005703 Ribosomal protein S3%2C eukaryotic/archaeal
Solyc03g113960	2.54051	3.17251e-07	1.3042e-06	Calmodulin binding protein (AHRD V1 ***- B6TKI3_MAIZE)%3B contains Interpro domain(s) IPR012416 Calmodulin binding protein-like
Solyc08g078520	2.53872	2.68022e-08	1.28093e-07
Solyc06g074990	2.53839	0.000218681	0.000564103	Nitrate transporter (AHRD V1 **** O04431_NICPL)%3B contains Interpro domain(s) IPR016196 Major facilitator superfamily%2C general substrate transporter
Solyc09g042660	2.53771	8.82327e-06	2.87533e-05	CBL-interacting protein kinase 22 (AHRD V1 **** A0MNK8_POPTR)%3B contains Interpro domain(s) IPR002290 Serine/threonine protein kinase
Solyc11g066920	2.5376	5.01992e-13	4.30635e-12	Pentatricopeptide repeat-containing protein (AHRD V1 ***- D7LQC4_ARALY)%3B contains Interpro domain(s) IPR002885 Pentatricopeptide repeat
Solyc10g008600	2.537	2.10224e-38	2.18203e-36	Unknown Protein (AHRD V1)
Solyc06g068400	2.53524	1.66236e-44	3.03211e-42	60S ribosomal protein L7-like protein (AHRD V1 ***- B3TM16_ELAGV)%3B contains Interpro domain(s) IPR005998 Ribosomal protein L7%2C eukaryotic
Solyc08g082820	2.53384	4.76999e-48	1.16382e-45	Heat shock protein (AHRD V1 ***- Q84KP8_CYAME)%3B contains Interpro domain(s) IPR013126 Heat shock protein 70
Solyc04g054730	2.53374	2.0195e-15	2.2787e-14	High affinity sulfate transporter 2 (AHRD V1 **** SUT2_STYHA)%3B contains Interpro domain(s) IPR001902 Sulphate anion transporter
Solyc03g111360	2.53348	3.2345e-12	2.5183e-11	Oxygen-independent coproporphyrinogen III oxidase-like protein sll1917 (AHRD V1 ***- B6UAC6_MAIZE)%3B contains Interpro domain(s) IPR004559 Putative oxygen-independent coproporphyrinogen III oxidase
Solyc04g072660	2.52915	3.43864e-38	3.41808e-36	Ribosomal protein L30 (AHRD V1 ***- B3TLP4_ELAGV)%3B contains Interpro domain(s) IPR000231 Ribosomal protein L30e
Solyc01g104010	2.52649	4.75435e-08	2.19405e-07	F2E2.8 (AHRD V1 ***- Q9LM58_ARATH)
Solyc09g065840	2.52416	8.20233e-34	5.42596e-32	Single-stranded DNA binding protein (AHRD V1 **** D7KGI0_ARALY)%3B contains Interpro domain(s) IPR012340 Nucleic acid-binding%2C OB-fold
Solyc06g076220	2.52404	2.95463e-26	9.94778e-25	Expansin-1 (AHRD V1 ***- Q6RX69_PETHY)%3B contains Interpro domain(s) IPR002963 Expansin
Solyc11g005840	2.52366	2.61025e-07	1.08613e-06	Cysteine desulfurase (AHRD V1 **-- A4A4I5_9GAMM)%3B contains Interpro domain(s) IPR000192 Aminotransferase%2C class V/Cysteine desulfurase
Solyc04g076330	2.52304	5.37483e-07	2.13708e-06	Pentatricopeptide repeat-containing protein (AHRD V1 ***- D7KMD0_ARALY)%3B contains Interpro domain(s) IPR002885 Pentatricopeptide repeat
Solyc01g095740	2.52042	2.38383e-39	2.73079e-37	ATP-dependent RNA helicase DBP4 (AHRD V1 *-** C1GZM0_PARBA)%3B contains Interpro domain(s) IPR011545 DNA/RNA helicase%2C DEAD/DEAH box type%2C N-terminal
Solyc01g100080	2.52023	1.74583e-30	8.26167e-29	Single-stranded DNA binding (AHRD V1 ***- Q2HW28_MEDTR)%3B contains Interpro domain(s) IPR000424 Primosome PriB/single-strand DNA-binding
Solyc02g071220	2.52005	5.20552e-14	5.03844e-13	Response regulator 5 (AHRD V1 ***- Q9FRZ0_MAIZE)%3B contains Interpro domain(s) IPR001789 Signal transduction response regulator%2C receiver region
Solyc11g005140	2.51982	6.03413e-30	2.71204e-28	Pentatricopeptide repeat protein (AHRD V1 ***- A0JBX0_ORYSJ)%3B contains Interpro domain(s) IPR002885 Pentatricopeptide repeat
Solyc04g081360	2.51952	3.41684e-35	2.5075e-33	tRNA (Adenine-N(1)-)-methyltransferase non-catalytic subunit trm6 (AHRD V1 *-** C5JJB9_AJEDS)%3B contains Interpro domain(s) IPR007316 Eukaryotic initiation factor 3%2C gamma subunit
Solyc12g005850	2.5159	5.45029e-25	1.57288e-23	Multidrug resistance protein mdtK (AHRD V1 *--- MDTK_ERWAM)%3B contains Interpro domain(s) IPR002528 Multi antimicrobial extrusion protein MatE
Solyc05g015800	2.51476	4.0131e-07	1.62662e-06	Acetyl coenzyme A cis-3-hexen-1-ol acetyl transferase (AHRD V1 **-* Q9SRQ2_ARATH)%3B contains Interpro domain(s) IPR003480 Transferase
Solyc01g094850	2.5139	1.06757e-05	3.43314e-05	Pentatricopeptide repeat-containing protein (AHRD V1 ***- D7LDV7_ARALY)%3B contains Interpro domain(s) IPR002885 Pentatricopeptide repeat
Solyc04g080650	2.51328	1.4391e-12	1.16687e-11	Cytochrome P450
Solyc10g011820	2.50917	1.02757e-07	4.51788e-07	Delta-6 desaturase (AHRD V1 **** D2KBG7_RIBNI)%3B contains Interpro domain(s) IPR012171 Fatty acid/sphingolipid desaturase
Solyc08g077320	2.50888	0.000159618	0.000422418	Pentatricopeptide repeat-containing protein (AHRD V1 ***- D7KHY5_ARALY)%3B contains Interpro domain(s) IPR002885 Pentatricopeptide repeat
Solyc05g006700	2.50844	2.86941e-10	1.76448e-09	Wall-associated receptor kinase-like 20 (AHRD V1 *--- WAKLQ_ARATH)
Solyc12g009800	2.5075	1.51483e-11	1.08789e-10	Purple acid phosphatase 3 (AHRD V1 ***- Q6J5M8_SOLTU)%3B contains Interpro domain(s) IPR015914 Purple acid phosphatase%2C N-terminal
Solyc01g008290	2.50683	1.03471e-35	8.03271e-34	Dihydroorotate dehydrogenase (AHRD V1 ***- B6U892_MAIZE)%3B contains Interpro domain(s) IPR005719 Dihydroorotate dehydrogenase%2C class 2
Solyc05g006460	2.50543	1.02703e-05	3.31413e-05	Pentatricopeptide repeat-containing protein (AHRD V1 ***- D7M3D7_ARALY)%3B contains Interpro domain(s) IPR002885 Pentatricopeptide repeat
Solyc03g122250	2.50366	2.93258e-14	2.90413e-13	Transmembrane protein (AHRD V1 **-- C0NFK1_AJECG)%3B contains Interpro domain(s) IPR009637 Transmembrane receptor%2C eukaryota
Solyc03g034400	2.50019	1.41028e-18	2.19329e-17	Multidrug resistance protein mdtK (AHRD V1 ***- MDTK_EDWI9)%3B contains Interpro domain(s) IPR015521 MATE family transporter related protein
Solyc08g014100	2.49956	6.12511e-14	5.87104e-13	Pentatricopeptide repeat-containing protein (AHRD V1 ***- D7LZR6_ARALY)%3B contains Interpro domain(s) IPR002885 Pentatricopeptide repeat
Solyc10g086680	2.49951	3.14013e-07	1.29117e-06	class I heat shock protein (AHRD V1 *-*- Q69BI7_CARPA)%3B contains Interpro domain(s) IPR008978 HSP20-like chaperone
Solyc03g051900	2.49899	1.27293e-34	9.02437e-33	30S ribosomal protein S1 (AHRD V1 *--- RS1_CHLPN)%3B contains Interpro domain(s) IPR003029 Ribosomal protein S1%2C RNA binding domain
Solyc03g120780	2.49899	2.59301e-41	3.66277e-39	Ribosomal protein L37 (AHRD V1 ***- B9RQN1_RICCO)%3B contains Interpro domain(s) IPR001569 Ribosomal protein L37e
Solyc04g005580	2.49822	0.000633985	0.00149275	Unknown Protein (AHRD V1)%3B contains Interpro domain(s) IPR012891 GCK
Solyc08g007570	2.49698	1.46118e-06	5.41525e-06	Unknown Protein (AHRD V1)
Solyc05g008190	2.49659	3.16568e-38	3.16349e-36	WD repeat protein 46 (AHRD V1 **-- B0W308_CULQU)%3B contains Interpro domain(s) IPR012952 BING4%2C C-terminal
Solyc02g067680	2.49654	9.18925e-09	4.65709e-08	RING finger protein (AHRD V1 ***- C6EUD3_SOYBN)%3B contains Interpro domain(s) IPR018957 Zinc finger%2C C3HC4 RING-type
Solyc09g010980	2.49562	9.13978e-16	1.06453e-14	Unknown Protein (AHRD V1)
Solyc06g068550	2.49293	4.45653e-09	2.3472e-08	Aspartic proteinase nepenthesin-1 (AHRD V1 **-- C0JAB4_ORYCO)%3B contains Interpro domain(s) IPR001461 Peptidase A1
Solyc07g005110	2.49233	6.12775e-05	0.00017448	S-receptor kinase-like protein 1 (AHRD V1 *-*- Q5NJB1_SENSQ)%3B contains Interpro domain(s) IPR002290 Serine/threonine protein kinase
Solyc01g096720	2.49003	0.00805015	0.0149696	Major facilitator superfamily transporter (AHRD V1 **-- A8NUY3_COPC7)%3B contains Interpro domain(s) IPR016196 Major facilitator superfamily%2C general substrate transporter
Solyc11g010220	2.48873	9.51286e-05	0.000261638	Pentatricopeptide repeat-containing protein (AHRD V1 ***- D7M3D7_ARALY)%3B contains Interpro domain(s) IPR002885 Pentatricopeptide repeat
Solyc01g005460	2.4885	2.46614e-06	8.80656e-06	Dynein light chain 1 cytoplasmic (AHRD V1 ***- C1BWV4_ESOLU)%3B contains Interpro domain(s) IPR001372 Dynein light chain%2C type 1 and 2
Solyc04g051480	2.48848	1.04962e-06	3.97727e-06	Pentatricopeptide repeat-containing protein (AHRD V1 ***- D7MHD4_ARALY)%3B contains Interpro domain(s) IPR002885 Pentatricopeptide repeat
Solyc01g099650	2.48836	2.39281e-10	1.48755e-09	Formin 3 (AHRD V1 *-*- D0QAN4_ARATH)%3B contains Interpro domain(s) IPR015425 Actin-binding FH2
Solyc04g025880	2.48597	4.47011e-06	1.53025e-05	Potassium transporter (AHRD V1 **** D2JYH2_GOSHI)%3B contains Interpro domain(s) IPR018519 Potassium uptake protein%2C kup IPR003855 K+ potassium transporter
Solyc12g042760	2.48565	0.00980683	0.017924	LRR receptor-like serine/threonine-protein kinase%2C RLP
Solyc08g013720	2.48554	1.28151e-25	3.99929e-24	Genomic DNA chromosome 5 TAC clone K15C23 (AHRD V1 **-- Q9LU06_ARATH)
Solyc07g055230	2.48552	3.31618e-35	2.44318e-33	50S ribosomal protein L5 (AHRD V1 ***- RL5_XANP2)%3B contains Interpro domain(s) IPR002132 Ribosomal protein L5
Solyc06g007220	2.48511	1.09873e-32	6.37093e-31	Unknown Protein (AHRD V1)%3B contains Interpro domain(s) IPR007836 Ribosomal protein L41
Solyc08g081380	2.48313	9.93591e-12	7.28209e-11	At5g63850-like protein (Fragment) (AHRD V1 *-*- Q3YI76_ARALY)%3B contains Interpro domain(s) IPR000210 BTB/POZ-like
Solyc01g087820	2.48149	9.96167e-14	9.32021e-13	Subtilisin-like protease (AHRD V1 **-- O82777_SOLLC)%3B contains Interpro domain(s) IPR015500 Peptidase S8%2C subtilisin-related IPR000209 Peptidase S8 and S53%2C subtilisin%2C kexin%2C sedolisin
Solyc09g082230	2.47724	3.39493e-17	4.58523e-16	Ribosomal-protein-alanine N-acetyltransferase (AHRD V1 **** A6CNK1_9BACI)%3B contains Interpro domain(s) IPR000182 GCN5-related N-acetyltransferase
Solyc03g120890	2.47678	9.57395e-12	7.02876e-11	GATA transcription factor 9 (AHRD V1 *-*- B6STZ1_MAIZE)%3B contains Interpro domain(s) IPR016679 Transcription factor%2C GATA%2C plant
Solyc11g066580	2.47594	1.03644e-10	6.72592e-10	Cytochrome P450
Solyc12g040510	2.47419	7.52587e-32	4.06289e-30	Guanine nucleotide-binding protein beta subunit-like protein (AHRD V1 **-- B6SJ21_MAIZE)%3B contains Interpro domain(s) IPR020472 G-protein beta WD-40 repeat%2C region
Solyc05g006130	2.47412	2.11402e-41	3.03176e-39	ATP-dependent RNA helicase (AHRD V1 *-** D3BPQ9_POLPA)%3B contains Interpro domain(s) IPR001650 DNA/RNA helicase%2C C-terminal
Solyc06g007760	2.47207	2.59387e-30	1.20622e-28	Ycf54 protein (AHRD V1 *--- Q8DIT2_THEEB)%3B contains Interpro domain(s) IPR019616 Protein of unknown function DUF2488
Solyc03g078620	2.47162	0.0111068	0.0200384	Unknown Protein (AHRD V1)
Solyc04g079860	2.47142	3.22308e-11	2.23357e-10	Glycosyltransferase family GT8 protein (AHRD V1 ***- D0ECQ6_POPDE)%3B contains Interpro domain(s) IPR002495 Glycosyl transferase%2C family 8
Solyc03g033610	2.47113	4.90225e-07	1.95996e-06	Receptor like kinase%2C RLK
Solyc02g087510	2.47078	1.09791e-05	3.52287e-05	Ribosomal protein S6 kinase alpha-2 (AHRD V1 *-** KS6A2_HUMAN)%3B contains Interpro domain(s) IPR002290 Serine/threonine protein kinase
Solyc09g005740	2.46985	5.6921e-37	5.02054e-35	Chloroplast lumen common family protein (AHRD V1 *--- D7LUJ6_ARALY)%3B contains Interpro domain(s) IPR011990 Tetratricopeptide-like helical
Solyc06g065340	2.46916	1.18488e-06	4.45384e-06	Unknown Protein (AHRD V1)
Solyc02g038690	2.46791	1.39913e-05	4.4103e-05	Histone H2B (AHRD V1 ***- A2IBL2_NICBE)%3B contains Interpro domain(s) IPR000558 Histone H2B
Solyc06g073300	2.46769	3.86044e-34	2.62776e-32	60S ribosomal protein L27 (AHRD V1 ***- A5C1Z2_VITVI)%3B contains Interpro domain(s) IPR001141 Ribosomal protein L27e
Solyc09g011820	2.46719	6.92065e-05	0.000194813	Unknown Protein (AHRD V1)
Solyc05g005680	2.46708	4.92506e-06	1.6744e-05	Xyloglucan endotransglucosylase/hydrolase 2 (AHRD V1 **** D5HP44_9ROSA)%3B contains Interpro domain(s) IPR016455 Xyloglucan endotransglucosylase/hydrolase
Solyc03g082830	2.46619	1.16646e-10	7.54103e-10	Pentatricopeptide repeat-containing protein (AHRD V1 ***- D7L041_ARALY)%3B contains Interpro domain(s) IPR002885 Pentatricopeptide repeat
Solyc08g006040	2.46388	3.25617e-46	6.50784e-44	40S ribosomal protein S6 (AHRD V1 ***- B6T1H0_MAIZE)%3B contains Interpro domain(s) IPR014401 Ribosomal protein S6%2C eukaryotic
Solyc01g100580	2.4602	5.48793e-23	1.29039e-21	Pentatricopeptide repeat-containing protein (AHRD V1 ***- D7KB79_ARALY)%3B contains Interpro domain(s) IPR002885 Pentatricopeptide repeat
Solyc08g006820	2.45997	2.06352e-17	2.85264e-16	Transmembrane 9 superfamily protein member 4 (AHRD V1 ***- B6SXZ2_MAIZE)%3B contains Interpro domain(s) IPR004240 Nonaspanin (TM9SF)
Solyc12g056960	2.45862	1.27084e-18	1.983e-17	Glucan 1 3-beta-glucosidase (AHRD V1 ***- C1H4T0_PARBA)%3B contains Interpro domain(s) IPR001547 Glycoside hydrolase%2C family 5
Solyc05g052670	2.45648	0.000807487	0.00185978	N-hydroxycinnamoyl/benzoyltransferase 1 (AHRD V1 **-- Q00M72_SOYBN)%3B contains Interpro domain(s) IPR003480 Transferase
Solyc02g089690	2.45626	3.69194e-12	2.85082e-11	Leaf senescence protein-like (AHRD V1 ***- Q8RV74_ORYSJ)%3B contains Interpro domain(s) IPR004253 Protein of unknown function DUF231%2C plant
Solyc09g011750	2.45599	1.46792e-20	2.73319e-19	Receptor-like protein kinase At5g59670 (AHRD V1 *-*- RLK7_ARATH)%3B contains Interpro domain(s) IPR002290 Serine/threonine protein kinase
Solyc03g097830	2.45586	1.47941e-33	9.51838e-32	Poly(A) polymerase (AHRD V1 ***- C3X539_OXAFO)%3B contains Interpro domain(s) IPR002646 Polynucleotide adenylyltransferase region
Solyc03g117510	2.45512	4.46054e-17	5.95594e-16	Formamidopyrimidine-DNA glycosylase (AHRD V1 **** C5JTH8_AJEDS)%3B contains Interpro domain(s) IPR000191 DNA glycosylase/AP lyase
Solyc03g118680	2.45419	2.53733e-43	4.18147e-41	Zinc finger protein (AHRD V1 *--- B6SYQ8_MAIZE)%3B contains Interpro domain(s) IPR001876 Zinc finger%2C RanBP2-type
Solyc05g010010	2.45339	3.32011e-12	2.58067e-11	Plant-specific domain TIGR01570 family protein (AHRD V1 ***- B6U2A5_MAIZE)%3B contains Interpro domain(s) IPR006460 Protein of unknown function DUF617%2C plant
Solyc11g008540	2.4521	2.60174e-14	2.60133e-13	Ribonuclease 3-like protein 3 (AHRD V1 *-*- RTL3_ORYSJ)%3B contains Interpro domain(s) IPR000999 Ribonuclease III
Solyc08g005960	2.45051	5.52154e-12	4.17773e-11	Cortical cell-delineating protein (AHRD V1 *--- B6U436_MAIZE)%3B contains Interpro domain(s) IPR013770 Plant lipid transfer protein and hydrophobic protein%2C helical
Solyc10g079860	2.45012	2.64459e-05	7.99419e-05	Beta-1 3-glucanase (AHRD V1 ***- Q68V46_OLEEU)%3B contains Interpro domain(s) IPR000490 Glycoside hydrolase%2C family 17
Solyc03g120930	2.44969	1.66256e-05	5.18931e-05	Avr9/Cf-9 rapidly elicited protein 146 (AHRD V1 ***- Q9FQZ6_TOBAC)
Solyc07g054490	2.44676	1.19413e-25	3.74525e-24	Secretory carrier membrane protein (AHRD V1 ***- B3TLU6_ELAGV)%3B contains Interpro domain(s) IPR007273 SCAMP
Solyc10g086710	2.44606	9.05541e-14	8.4977e-13	PAR-1b protein (AHRD V1 ***- Q43588_TOBAC)%3B contains Interpro domain(s) IPR009489 PAR1
Solyc07g056270	2.4454	8.24804e-40	1.01278e-37	Receptor-like protein kinase (AHRD V1 ***- Q9LYS5_ARATH)%3B contains Interpro domain(s) IPR002290 Serine/threonine protein kinase
Solyc09g092440	2.44336	4.98005e-08	2.29034e-07	Pentatricopeptide repeat-containing protein (AHRD V1 ***- D7LCN4_ARALY)%3B contains Interpro domain(s) IPR002885 Pentatricopeptide repeat
Solyc03g095980	2.44096	9.84902e-07	3.74945e-06	Transcription factor bHLH51 (AHRD V1 **-* BH051_ARATH)%3B contains Interpro domain(s) IPR001092 Basic helix-loop-helix dimerisation region bHLH
Solyc05g012270	2.44054	7.91482e-29	3.26087e-27	Argininosuccinate synthase (AHRD V1 **** B9S599_RICCO)%3B contains Interpro domain(s) IPR001518 Argininosuccinate synthase
Solyc03g112360	2.43912	3.22403e-33	2.01229e-31	60S ribosomal protein L27A (AHRD V1 ***- B6VC54_VERFO)%3B contains Interpro domain(s) IPR001196 Ribosomal protein L15
Solyc02g085210	2.43652	2.76477e-19	4.61295e-18	UPF0567 protein C13orf39 homolog (AHRD V1 *--- CM039_MOUSE)%3B contains Interpro domain(s) IPR019410 Methyltransferase-16%2C putative
Solyc02g076730	2.43616	2.1595e-09	1.18731e-08	Unknown Protein (AHRD V1)
Solyc08g077550	2.43586	1.33925e-17	1.88609e-16	Novel plant SNARE 11 (AHRD V1 ***- B6TAD9_MAIZE)%3B contains Interpro domain(s) IPR000727 Target SNARE coiled-coil region
Solyc06g075010	2.4355	2.3936e-29	1.03854e-27	chaperonin (AHRD V1 ***- B2IXD2_NOSP7)%3B contains Interpro domain(s) IPR001844 Chaperonin Cpn60
Solyc01g110630	2.43508	0.000162362	0.000428894	Auxin-induced SAUR-like protein (AHRD V1 ***- Q8S351_CAPAN)%3B contains Interpro domain(s) IPR003676 Auxin responsive SAUR protein
Solyc07g005960	2.43486	1.90764e-16	2.38766e-15	Serine carboxypeptidase K10B2.2 (AHRD V1 **** B6TM29_MAIZE)%3B contains Interpro domain(s) IPR001563 Peptidase S10%2C serine carboxypeptidase
Solyc07g064830	2.43397	2.3472e-34	1.63929e-32	1 4-alpha-glucan branching enzyme (AHRD V1 **** C5FVR4_NANOT)%3B contains Interpro domain(s) IPR006589 Glycosyl hydrolase%2C family 13%2C subfamily%2C catalytic region
Solyc02g032960	2.43382	8.50541e-40	1.03761e-37	Cell division protease FtsH homolog (AHRD V1 *--- C5NVJ0_9BACL)%3B contains Interpro domain(s) IPR003959 ATPase%2C AAA-type%2C core
Solyc01g100730	2.43342	2.46973e-14	2.48521e-13	UPF0176 protein yceA (AHRD V1 *--- YCEA_ECOL6)%3B contains Interpro domain(s) IPR001763 Rhodanese-like
Solyc04g077490	2.43145	6.9624e-07	2.70813e-06	AP2-like ethylene-responsive transcription factor At1g16060 (AHRD V1 *-*- AP2L1_ARATH)%3B contains Interpro domain(s) IPR001471 Pathogenesis-related transcriptional factor and ERF%2C DNA-binding
Solyc02g085650	2.42806	2.16282e-18	3.30349e-17	Pentatricopeptide repeat-containing protein (AHRD V1 *-*- D7MBF2_ARALY)%3B contains Interpro domain(s) IPR000994 Peptidase M24%2C structural domain
Solyc03g121440	2.4253	1.32186e-15	1.51982e-14	Receptor-like protein kinase At3g21340 (AHRD V1 *-*- RLK6_ARATH)%3B contains Interpro domain(s) IPR002290 Serine/threonine protein kinase
Solyc09g090670	2.42266	6.52941e-14	6.23313e-13	Oxidation resistance 1-like protein (AHRD V1 *--- Q6Z157_ORYSJ)%3B contains Interpro domain(s) IPR006571 TLDc
Solyc02g067660	2.42238	2.17257e-22	4.83602e-21	Phytoalexin deficient 4 (Fragment) (AHRD V1 **-- B2BDV5_ARALY)%3B contains Interpro domain(s) IPR002921 Lipase%2C class 3
Solyc01g006140	2.42233	4.35642e-13	3.75777e-12	DNA replication factor Cdt1 (AHRD V1 *-*- CDT1_HUMAN)%3B contains Interpro domain(s) IPR014939 DNA replication factor CDT1-like
Solyc03g006300	2.42199	1.06095e-06	4.01532e-06	Receptor like kinase%2C RLK
Solyc01g006920	2.42093	2.09534e-05	6.44697e-05	Pentatricopeptide repeat-containing protein (AHRD V1 ***- D7KZF9_ARALY)%3B contains Interpro domain(s) IPR002885 Pentatricopeptide repeat
Solyc03g113280	2.42052	1.2172e-16	1.5535e-15	Membrane protein HPP family (AHRD V1 *-*- D9Y9E6_9DELT)%3B contains Interpro domain(s) IPR007065 HPP
Solyc06g075180	2.42008	1.22417e-42	1.85472e-40	Ribosomal protein L12 (AHRD V1 ***- A8J597_CHLRE)%3B contains Interpro domain(s) IPR000911 Ribosomal protein L11
Solyc03g005690	2.41977	1.56647e-21	3.17468e-20	Cysteine-rich repeat secretory protein 3 (AHRD V1 ***- CRR3_ARATH)%3B contains Interpro domain(s) IPR002902 Protein of unknown function DUF26
Solyc02g089250	2.41401	2.40557e-08	1.15584e-07	Pollen Ole e 1 allergen and extensin (AHRD V1 *-*- Q2HSE9_MEDTR)%3B contains Interpro domain(s) IPR006041 Pollen Ole e 1 allergen and extensin
Solyc11g006350	2.41372	5.26239e-35	3.80248e-33	Aspartate carbamoyltransferase (AHRD V1 ***- Q8L6B8_SOLTU)%3B contains Interpro domain(s) IPR002082 Aspartate carbamoyltransferase%2C eukaryotic
Solyc07g041290	2.41356	0.000555969	0.00132584	Unknown Protein (AHRD V1)
Solyc11g012240	2.41271	6.35618e-06	2.12555e-05	Wax synthase isoform 3 (AHRD V1 **-- Q84XY7_VITVI)
Solyc10g076790	2.41268	1.12324e-12	9.24322e-12	Auxin transporter-like protein 1 (AHRD V1 **** B6U1Y3_MAIZE)%3B contains Interpro domain(s) IPR013057 Amino acid transporter%2C transmembrane
Solyc12g096820	2.40861	1.7601e-10	1.11487e-09	UDP-glucosyltransferase family 1 protein (AHRD V1 ***- C6KI44_CITSI)%3B contains Interpro domain(s) IPR002213 UDP-glucuronosyl/UDP-glucosyltransferase
Solyc11g012200	2.40737	0.000237741	0.000609337	Wax synthase isoform 3 (AHRD V1 **-- Q84XY7_VITVI)
Solyc08g005880	2.40673	0.000121827	0.000328893	Multidrug resistance protein mdtK (AHRD V1 **-- MDTK_PROMH)%3B contains Interpro domain(s) IPR002528 Multi antimicrobial extrusion protein MatE
Solyc12g096150	2.40599	1.50801e-41	2.17931e-39	60S ribosomal protein L13 (AHRD V1 ***- Q3HRY7_SOLTU)%3B contains Interpro domain(s) IPR001380 Ribosomal protein L13e
Solyc12g098410	2.40527	2.27154e-09	1.24237e-08	Glucan endo-1 3-beta-glucosidase 4 (AHRD V1 *-*- B6T2U4_MAIZE)%3B contains Interpro domain(s) IPR012946 X8
Solyc05g048750	2.40503	1.34497e-26	4.63631e-25	Unknown Protein (AHRD V1)
Solyc08g078560	2.4034	4.53253e-30	2.05187e-28	Unknown Protein (AHRD V1)
Solyc02g079210	2.40293	1.7459e-33	1.11946e-31	DAG protein (AHRD V1 *-*- B6SJX7_MAIZE)
Solyc02g069280	2.40291	0.00326078	0.00664501	ARGONAUTE 1 (AHRD V1 ***- D6RUV9_TOBAC)%3B contains Interpro domain(s) IPR003165 Stem cell self-renewal protein Piwi
Solyc09g098110	2.40288	2.83073e-16	3.48728e-15	BHLH transcription factor (AHRD V1 *-** B6SY24_MAIZE)%3B contains Interpro domain(s) IPR001092 Basic helix-loop-helix dimerisation region bHLH
Solyc09g009400	2.40238	6.46842e-19	1.03865e-17	APO protein 1%2C chloroplastic (AHRD V1 ***- APO1_ARATH)%3B contains Interpro domain(s) IPR008512 Protein of unknown function DUF794%2C plant
Solyc11g010440	2.40016	2.16446e-06	7.79893e-06	FIP1 (AHRD V1 **-- B6SNS7_MAIZE)%3B contains Interpro domain(s) IPR004182 GRAM
Solyc07g032240	2.39993	3.69528e-26	1.22439e-24	Protein arginine N-methyltransferase 1 (AHRD V1 **** B6TIG8_MAIZE)
Solyc01g100570	2.39944	9.69585e-31	4.64684e-29	Nucleolar protein (AHRD V1 ***- Q9LTV0_ARATH)%3B contains Interpro domain(s) IPR002687 Pre-mRNA processing ribonucleoprotein%2C binding region
Solyc04g078660	2.39886	4.23079e-07	1.7097e-06	Hydroxycinnamoyl transferase (AHRD V1 **-* D2XJ64_9MAGN)%3B contains Interpro domain(s) IPR003480 Transferase
Solyc02g093400	2.39775	5.69478e-07	2.2538e-06	Integral membrane protein MviN (AHRD V1 ***- D8G376_9CYAN)%3B contains Interpro domain(s) IPR004268 Flagellin assembly%2C membrane protein MviN
Solyc02g070640	2.39741	1.36116e-40	1.7396e-38	60S ribosomal protein L18a (AHRD V1 ***- D2D962_9ROSI)%3B contains Interpro domain(s) IPR002670 Ribosomal protein L18ae
Solyc09g066290	2.3967	4.91979e-27	1.74722e-25	Kinesin light chain-like (AHRD V1 **-- Q6K715_ORYSJ)%3B contains Interpro domain(s) IPR011990 Tetratricopeptide-like helical
Solyc01g100600	2.39638	7.00226e-05	0.000196992	Kelch domain-containing protein 3 (AHRD V1 *--- B0W5R4_CULQU)%3B contains Interpro domain(s) IPR015915 Kelch-type beta propeller
Solyc01g079410	2.39464	1.54324e-13	1.40947e-12	SMP-30/Gluconolaconase/LRE domain protein (AHRD V1 *-*- D2QD53_SPILD)%3B contains Interpro domain(s) IPR011042 Six-bladed beta-propeller%2C TolB-like
Solyc01g107270	2.39356	1.11669e-09	6.37281e-09	Phosphoribosylformylglycinamidine synthase (AHRD V1 ***- A9Y5J1_ARATH)%3B contains Interpro domain(s) IPR010073 Phosphoribosylformylglycinamidine synthase%2C eukaryotes and proteobacteria
Solyc02g083720	2.39325	2.37159e-07	9.92762e-07	MLO-like protein 4 (AHRD V1 ***- B6TXU3_MAIZE)%3B contains Interpro domain(s) IPR004326 Mlo-related protein
Solyc01g103530	2.39295	7.49702e-24	1.95892e-22	Receptor like kinase%2C RLK
Solyc05g026240	2.39213	4.88479e-22	1.04641e-20	LRR receptor-like serine/threonine-protein kinase%2C RLP
Solyc04g015940	2.39048	8.26766e-36	6.55377e-34	Ribosomal RNA-processing protein (AHRD V1 *--- C1GNI2_PARBA)%3B contains Interpro domain(s) IPR016024 Armadillo-type fold
Solyc12g056300	2.38995	1.64786e-15	1.87854e-14	Receptor like kinase%2C RLK
Solyc07g008800	2.38935	8.75865e-30	3.91783e-28	chaperonin (AHRD V1 ***- O24186_ORYSA)%3B contains Interpro domain(s) IPR001476 Chaperonin Cpn10
Solyc11g007940	2.38644	2.46599e-08	1.18275e-07	Poly(RC) binding protein 3 (AHRD V1 ***- Q6AY48_RAT)%3B contains Interpro domain(s) IPR018111 K Homology%2C type 1%2C subgroup
Solyc03g115610	2.38383	2.3816e-08	1.14491e-07	Receptor like kinase%2C RLK
Solyc02g062700	2.38356	2.49704e-32	1.40876e-30	26S protease regulatory subunit 6A (AHRD V1 *--- PRS6A_YEAST)%3B contains Interpro domain(s) IPR003959 ATPase%2C AAA-type%2C core
Solyc10g084380	2.38129	1.56636e-21	3.17468e-20	WRKY transcription factor 42 (Fragment) (AHRD V1 **-- B2KJ82_HORVD)%3B contains Interpro domain(s) IPR003657 DNA-binding WRKY
Solyc02g065410	2.38069	8.11924e-09	4.145e-08	Pentatricopeptide repeat-containing protein (AHRD V1 ***- D7KIA6_ARALY)%3B contains Interpro domain(s) IPR002885 Pentatricopeptide repeat
Solyc04g078800	2.37904	5.55387e-06	1.87352e-05	Lipase class 3-like (AHRD V1 ***- Q6Z307_ORYSJ)%3B contains Interpro domain(s) IPR002921 Lipase%2C class 3
Solyc02g086480	2.37895	0.00235459	0.00493317	LOB domain protein (AHRD V1 ***- Q9AS62_ORYSJ)%3B contains Interpro domain(s) IPR004883 Lateral organ boundaries%2C LOB
Solyc10g083600	2.37864	4.41355e-31	2.22299e-29	Ribosome production factor 2 homolog (AHRD V1 **-- RPF2_ORYSJ)%3B contains Interpro domain(s) IPR007109 Brix domain
Solyc04g058080	2.37735	4.30771e-06	1.47924e-05	Glucan endo-1 3-beta-glucosidase (AHRD V1 *-*- B6THD2_MAIZE)%3B contains Interpro domain(s) IPR012946 X8
Solyc01g100280	2.3771	1.28069e-16	1.6301e-15	ATP-DEPENDENT DNA HELICASE (AHRD V1 *-** Q8SRI7_ENCCU)%3B contains Interpro domain(s) IPR004589 DNA helicase%2C ATP-dependent%2C RecQ type
Solyc06g072250	2.37709	1.2629e-24	3.53068e-23	Methyltransferase WBSCR22 (AHRD V1 **-* B6TAS9_MAIZE)%3B contains Interpro domain(s) IPR013216 Methyltransferase type 11
Solyc08g080720	2.37541	9.84662e-13	8.17809e-12	Selenoprotein H (AHRD V1 *-*- A8JGP7_CHLRE)%3B contains Interpro domain(s) IPR011893 SelT/selW/selH selenoprotein
Solyc03g113760	2.37446	2.8287e-05	8.51238e-05	E2F transcription factor-like protein (AHRD V1 ***- Q9LFQ9_ARATH)%3B contains Interpro domain(s) IPR015633 E2F Family
Solyc05g054110	2.37432	4.01606e-09	2.12723e-08	RHO protein GDP dissociation inhibitor (AHRD V1 **** Q705X3_MEDTR)%3B contains Interpro domain(s) IPR000406 RHO protein GDP dissociation inhibitor
Solyc05g054480	2.37373	3.09519e-12	2.41384e-11	Actin (AHRD V1 ***- B5M4V6_TOBAC)%3B contains Interpro domain(s) IPR004000 Actin/actin-like
Solyc07g043490	2.37373	2.25655e-18	3.44106e-17	UDP-glucosyltransferase family 1 protein (AHRD V1 **-* C6KI43_CITSI)%3B contains Interpro domain(s) IPR002213 UDP-glucuronosyl/UDP-glucosyltransferase
Solyc01g080900	2.37361	2.92322e-08	1.3889e-07	Cytochrome P450
Solyc06g083820	2.3722	1.07097e-38	1.14973e-36	60 ribosomal protein L14 (AHRD V1 ***- B6TMP6_MAIZE)%3B contains Interpro domain(s) IPR002784 Ribosomal protein L14
Solyc05g014980	2.37127	2.65699e-30	1.22948e-28	Adenylate kinase (AHRD V1 ***- D7MQ61_ARALY)%3B contains Interpro domain(s) IPR006259 Adenylate kinase%2C subfamily
Solyc02g083610	2.37065	0.000390653	0.000960628	BZIP transcription factor (AHRD V1 *-*- D3YBE4_TRIRP)%3B contains Interpro domain(s) IPR006867 Protein of unknown function DUF632
Solyc02g094160	2.37041	1.2528e-17	1.76699e-16	Ribonucleoside-diphosphate reductase small chain (AHRD V1 **** B6TLH5_MAIZE)%3B contains Interpro domain(s) IPR000358 Ribonucleotide reductase
Solyc03g111050	2.3701	9.69572e-40	1.17518e-37	Plastid RNA-binding protein (AHRD V1 **-- D6QX33_NICBE)%3B contains Interpro domain(s) IPR003029 Ribosomal protein S1%2C RNA binding domain
Solyc02g080550	2.36923	4.2654e-05	0.00012478	Unknown Protein (AHRD V1)
Solyc01g006370	2.3684	1.7884e-25	5.4721e-24	Glucan synthase like 3 (AHRD V1 ***- D8R8I5_SELML)%3B contains Interpro domain(s) IPR003440 Glycosyl transferase%2C family 48
Solyc03g079930	2.36754	9.11626e-33	5.38576e-31	Mitochondrial glycoprotein family protein (AHRD V1 ***- D7LDS6_ARALY)%3B contains Interpro domain(s) IPR003428 Mitochondrial glycoprotein
Solyc04g074430	2.3662	1.77219e-10	1.12215e-09	Phi-1 protein (Fragment) (AHRD V1 *-*- Q4LAX0_CAPCH)%3B contains Interpro domain(s) IPR006766 Phosphate-induced protein 1 conserved region
Solyc10g078340	2.36597	5.66561e-18	8.32211e-17
Solyc12g098360	2.36583	9.81958e-13	8.15924e-12	Uncharacterized ACR COG1565 family protein (AHRD V1 **-- B6TEQ7_MAIZE)%3B contains Interpro domain(s) IPR003788 Protein of unknown function DUF185
Solyc11g010260	2.36335	7.69487e-07	2.97089e-06	Pentatricopeptide repeat-containing protein (AHRD V1 ***- D7KCY7_ARALY)%3B contains Interpro domain(s) IPR002885 Pentatricopeptide repeat
Solyc02g078830	2.36312	2.37518e-29	1.03293e-27	WD-40 repeat protein (AHRD V1 **-- B2IZJ6_NOSP7)%3B contains Interpro domain(s) IPR020472 G-protein beta WD-40 repeat%2C region
Solyc01g095680	2.36182	7.83914e-33	4.72032e-31	Unknown Protein (AHRD V1)
Solyc02g080290	2.36095	1.46573e-13	1.34326e-12	Beta-glucosidase 47 (AHRD V1 **** D7MEP5_ARALY)%3B contains Interpro domain(s) IPR001360 Glycoside hydrolase%2C family 1
Solyc10g086210	2.36045	6.48173e-29	2.70605e-27	Translin-like protein (AHRD V1 ***- Q9SJK5_ARATH)%3B contains Interpro domain(s) IPR002848 Translin
Solyc01g104590	2.35911	5.96799e-38	5.6342e-36	Ribosomal protein L3 (AHRD V1 ***- Q6SKP4_SOLLC)%3B contains Interpro domain(s) IPR019926 Ribosomal protein L3%2C conserved site IPR000597 Ribosomal protein L3
Solyc07g049550	2.35904	1.66156e-10	1.05494e-09	1-aminocyclopropane-1-carboxylate oxidase (AHRD V1 **** Q94F66_SOLTU)%3B contains Interpro domain(s) IPR005123 Oxoglutarate and iron-dependent oxygenase
Solyc05g054070	2.35689	2.12796e-38	2.19659e-36	60S ribosomal protein L6 (AHRD V1 ***- B9RHH3_RICCO)%3B contains Interpro domain(s) IPR000915 Ribosomal protein L6E
Solyc11g012520	2.35683	5.66131e-08	2.5853e-07	Unknown Protein (AHRD V1)
Solyc04g009640	2.35681	7.00045e-07	2.7218e-06	Receptor like kinase%2C RLK
Solyc03g116380	2.35534	4.7846e-38	4.65742e-36	WD-40 repeat protein (AHRD V1 *-*- B2IUC6_NOSP7)%3B contains Interpro domain(s) IPR012979 Protein of unknown function NUC189%2C C-terminal
Solyc03g110970	2.35531	7.70306e-19	1.22538e-17	GDP-mannose transporter (AHRD V1 ***- C1GF36_PARBD)
Solyc08g062810	2.35525	4.34823e-05	0.000126947	Unknown Protein (AHRD V1)
Solyc08g076300	2.35487	1.23525e-13	1.14037e-12	4-coumarate-coa ligase (AHRD V1 **** B9GZT7_POPTR)%3B contains Interpro domain(s) IPR000873 AMP-dependent synthetase and ligase
Solyc10g079600	2.35467	5.98265e-22	1.27145e-20	Response regulator 6 (AHRD V1 ***- Q9FRY9_MAIZE)%3B contains Interpro domain(s) IPR001789 Signal transduction response regulator%2C receiver region
Solyc09g089670	2.35302	3.61508e-27	1.29365e-25	Nicotiana lesion-inducing like (AHRD V1 ***- B6T757_MAIZE)%3B contains Interpro domain(s) IPR008637 HR-like lesion-inducer
Solyc03g123700	2.35286	8.82157e-31	4.24951e-29	NUMOD3 motif family protein expressed (AHRD V1 *--- Q109Y3_ORYSJ)%3B contains Interpro domain(s) IPR003611 Intron-encoded nuclease 2
Solyc11g007750	2.3517	1.06948e-07	4.68897e-07	Potassium-tellurite ethidium and proflavin transporter (AHRD V1 *--- C5S1A7_9PAST)%3B contains Interpro domain(s) IPR001378 Uncharacterised protein family UPF0066
Solyc06g072660	2.34848	7.37227e-18	1.07035e-16	Dek protein (AHRD V1 *-*- B6SWA1_MAIZE)%3B contains Interpro domain(s) IPR014876 DEK%2C C-terminal
Solyc02g078870	2.34594	9.68333e-05	0.000266005	Unknown Protein (AHRD V1)
Solyc04g054510	2.34528	5.63548e-22	1.19902e-20	DNA-directed RNA polymerase I subunit RPA12 (AHRD V1 **** B5X948_SALSA)%3B contains Interpro domain(s) IPR001222 Zinc finger%2C TFIIS-type
Solyc12g096810	2.34523	2.60501e-23	6.34765e-22	LETM1 and EF-hand domain-containing protein 1%2C mitochondrial (AHRD V1 *--- LETM1_CHICK)%3B contains Interpro domain(s) IPR011685 LETM1-like
Solyc01g102690	2.34462	5.67142e-07	2.2455e-06	Pentatricopeptide repeat-containing protein (AHRD V1 ***- D7LSX0_ARALY)%3B contains Interpro domain(s) IPR002885 Pentatricopeptide repeat
Solyc04g064870	2.34449	6.74493e-17	8.89241e-16	Pathogenesis-related protein-like protein (AHRD V1 ***- Q8L9B0_ARATH)
Solyc11g068980	2.34368	6.40341e-23	1.49628e-21	Mitochondrial import inner membrane translocase subunit tim22 (AHRD V1 ***- B6U2A3_MAIZE)%3B contains Interpro domain(s) IPR003397 Mitochondrial inner membrane translocase complex%2C subunit Tim17/22
Solyc01g100430	2.34283	1.13798e-35	8.79806e-34	Ribosomal RNA small subunit methyltransferase A (AHRD V1 ***- RSMA_CYAP8)%3B contains Interpro domain(s) IPR011530 rRNA adenine dimethylase
Solyc11g066690	2.3416	5.12797e-07	2.04629e-06	OB-fold nucleic acid binding domain containing protein expressed (AHRD V1 ***- Q10F22_ORYSJ)%3B contains Interpro domain(s) IPR004365 Nucleic acid binding%2C OB-fold%2C tRNA/helicase-type
Solyc11g012670	2.34156	1.45271e-23	3.67323e-22	Pentatricopeptide repeat-containing protein (AHRD V1 ***- D7MRC5_ARALY)%3B contains Interpro domain(s) IPR002625 Smr protein/MutS2 C-terminal
Solyc06g076660	2.3413	6.32691e-29	2.65321e-27	Proliferating cell nuclear antigen (AHRD V1 ***- Q8H0Q1_SOLLC)%3B contains Interpro domain(s) IPR000730 Proliferating cell nuclear antigen%2C PCNA
Solyc03g063040	2.3406	2.80351e-24	7.57836e-23	Amino acid transporter (AHRD V1 ***- B9HLH9_POPTR)%3B contains Interpro domain(s) IPR013057 Amino acid transporter%2C transmembrane
Solyc10g086190	2.33962	9.90248e-34	6.45965e-32	Adenosine kinase (AHRD V1 ***- D2D2Z6_GOSHI)%3B contains Interpro domain(s) IPR001805 Adenosine kinase
Solyc06g083080	2.33894	5.17413e-16	6.19543e-15	Unknown Protein (AHRD V1)
Solyc04g078740	2.33889	6.11399e-13	5.17637e-12	Subtilisin-like protease (AHRD V1 **-- Q38708_ALNGL)%3B contains Interpro domain(s) IPR015500 Peptidase S8%2C subtilisin-related
Solyc02g024050	2.33777	5.15967e-27	1.82896e-25	Ferredoxin--NADP reductase (AHRD V1 ***- B9SB31_RICCO)%3B contains Interpro domain(s) IPR012146 Ferredoxin--NADP reductase
Solyc08g078720	2.33718	8.66881e-27	3.02715e-25	Heat shock protein (AHRD V1 *-*- O64960_MAIZE)%3B contains Interpro domain(s) IPR008978 HSP20-like chaperone
Solyc11g008940	2.33708	2.09524e-21	4.201e-20	Pentatricopeptide repeat-containing protein (AHRD V1 ***- D7KMD0_ARALY)%3B contains Interpro domain(s) IPR002885 Pentatricopeptide repeat
Solyc03g112530	2.33534	4.22092e-28	1.65205e-26	Guanine nucleotide-binding protein G(I)/G(S)/G(T) subunit beta-3 (AHRD V1 **-* GBB3_HUMAN)%3B contains Interpro domain(s) IPR020472 G-protein beta WD-40 repeat%2C region
Solyc03g115360	2.33486	2.78437e-36	2.32489e-34	40S ribosomal protein S19-like (AHRD V1 ***- Q2VCJ6_SOLTU)%3B contains Interpro domain(s) IPR001266 Ribosomal protein S19e
Solyc07g039380	2.33405	3.01941e-14	2.98399e-13	Unknown Protein (AHRD V1)
Solyc11g007740	2.33371	1.36601e-26	4.69163e-25	Ribosome-recycling factor (AHRD V1 ***- Q1K328_DESAC)%3B contains Interpro domain(s) IPR015998 Ribosome recycling factor%2C bacterial-like
Solyc02g062890	2.3316	2.24776e-05	6.88212e-05	Myo-inositol transporter 2 (AHRD V1 **** ITR2_SCHPO)%3B contains Interpro domain(s) IPR003663 Sugar/inositol transporter
Solyc10g081510	2.33159	1.17871e-24	3.30513e-23	5-methyltetrahydropteroyltriglutamate--homocysteine methyltransferase (AHRD V1 ***- B6UF55_MAIZE)%3B contains Interpro domain(s) IPR006276 5-methyltetrahydropteroyltriglutamate--homocysteine S-methyltransferase
Solyc04g016380	2.33057	3.2487e-35	2.40288e-33	Ribosome biogenesis protein BRX1 (AHRD V1 ***- B3LIY5_YEAS1)%3B contains Interpro domain(s) IPR007109 Brix domain
Solyc01g067510	2.33016	6.57142e-09	3.39445e-08	Receptor-like kinase (AHRD V1 **** A7VM36_MARPO)%3B contains Interpro domain(s) IPR002290 Serine/threonine protein kinase
Solyc12g056120	2.32984	7.43252e-20	1.29772e-18	6-phosphogluconate dehydrogenase decarboxylating (AHRD V1 ***- Q9FFR3_ARATH)%3B contains Interpro domain(s) IPR006113 6-phosphogluconate dehydrogenase%2C decarboxylating
Solyc02g080450	2.32884	2.18302e-09	1.19919e-08	Unknown Protein (AHRD V1)
Solyc07g025380	2.32798	2.00513e-14	2.03075e-13	Unknown Protein (AHRD V1)
Solyc12g042650	2.32776	1.07312e-37	1.00302e-35	40S ribosomal protein S12 (AHRD V1 ***- Q8H2J8_ORYSJ)%3B contains Interpro domain(s) IPR000530 Ribosomal protein S12e
Solyc08g081610	2.32743	7.48062e-06	2.47427e-05	WRKY transcription factor 23 (AHRD V1 ***- C9DI12_9ROSI)%3B contains Interpro domain(s) IPR003657 DNA-binding WRKY
Solyc03g121600	2.3246	4.40555e-05	0.00012854	Choline dehydrogenase (AHRD V1 ***- B0WJG6_CULQU)%3B contains Interpro domain(s) IPR012132 Glucose-methanol-choline oxidoreductase
Solyc10g080640	2.32249	0.00186943	0.00399557	Calmodulin binding protein (AHRD V1 *--* B6U0B7_MAIZE)
Solyc12g010800	2.32199	5.22359e-11	3.51867e-10	BZIP transcription factor family protein (AHRD V1 ***- D7LW03_ARALY)%3B contains Interpro domain(s) IPR011700 Basic leucine zipper
Solyc01g107580	2.32185	1.12931e-26	3.90008e-25	Pseudouridine synthase family protein (AHRD V1 ***- D7L9Z2_ARALY)%3B contains Interpro domain(s) IPR006145 Pseudouridine synthase%2C RsuA and RluB/C/D/E/F
Solyc12g042520	2.32184	3.87145e-06	1.3412e-05	Gibberellin-regulated family protein (AHRD V1 **-- D7MT35_ARALY)%3B contains Interpro domain(s) IPR003854 Gibberellin regulated protein
Solyc07g006990	2.32125	1.96888e-06	7.1422e-06	Pentatricopeptide repeat-containing protein (AHRD V1 ***- D7M9F5_ARALY)%3B contains Interpro domain(s) IPR002885 Pentatricopeptide repeat
Solyc01g099030	2.3205	7.24225e-21	1.39836e-19	GDSL esterase/lipase At1g28590 (AHRD V1 **** GDL8_ARATH)%3B contains Interpro domain(s) IPR001087 Lipase%2C GDSL
Solyc08g007140	2.31973	2.8363e-40	3.57621e-38	60S ribosomal protein L37a (AHRD V1 ***- Q5GMM4_CAPCH)%3B contains Interpro domain(s) IPR002674 Ribosomal protein L37ae
Solyc05g008480	2.31931	2.70654e-05	8.16306e-05	Histone chaperone asf1 (AHRD V1 **** B0XH11_CULQU)%3B contains Interpro domain(s) IPR006818 Histone chaperone%2C ASF1-like
Solyc05g041440	2.31874	1.54482e-05	4.84516e-05	Genomic DNA chromosome 5 P1 clone MUK11 (AHRD V1 ***- Q9LZ27_ARATH)
Solyc05g007180	2.31854	2.74933e-20	4.99533e-19	Homeobox-leucine zipper-like protein (AHRD V1 *-*- Q3HRT1_PICGL)%3B contains Interpro domain(s) IPR003106 Leucine zipper%2C homeobox-associated
Solyc09g007360	2.31821	4.78462e-12	3.64808e-11	Interactor of constitutive active ROPs 3 (AHRD V1 ***- ICR3_ARATH)
Solyc06g068310	2.31757	0.0014846	0.00324807	Jp18 (AHRD V1 ***- Q8H6R4_PONTR)%3B contains Interpro domain(s) IPR010993 Sterile alpha motif homology
Solyc01g097760	2.31699	1.82724e-37	1.67455e-35	Ribosomal protein L7a (AHRD V1 ***- A8J567_CHLRE)%3B contains Interpro domain(s) IPR001921 Ribosomal protein L7A
Solyc12g094390	2.31686	1.03767e-05	3.34557e-05	Syringolide-induced protein 14-1-1 (Fragment) (AHRD V1 *-*- Q06H38_ARAHY)
Solyc12g014230	2.31644	1.49367e-35	1.13609e-33	DAG protein (AHRD V1 *--- B6TDH1_MAIZE)
Solyc08g066750	2.3161	2.84906e-24	7.69041e-23	Major facilitator superfamily domain containing protein 5 (AHRD V1 ***- B2W8V3_PYRTR)%3B contains Interpro domain(s) IPR008509 Protein of unknown function DUF791
Solyc02g063090	2.31555	1.09131e-25	3.45742e-24	T-complex protein 1 subunit zeta (AHRD V1 ***- B6T8Q5_MAIZE)%3B contains Interpro domain(s) IPR012722 T-complex protein 1%2C zeta subunit
Solyc01g006320	2.31258	1.98065e-09	1.09507e-08	Non-race specific disease resistance protein 1-like protein b (AHRD V1 ***- D2CFI3_COFAR)%3B contains Interpro domain(s) IPR010847 Harpin-induced 1
Solyc12g099960	2.31218	6.41858e-28	2.4761e-26	Unknown Protein (AHRD V1)
Solyc08g008590	2.31082	2.41987e-33	1.53071e-31	Ubiquitin (AHRD V1 ***- C0SFI2_PARBP)%3B contains Interpro domain(s) IPR019956 Ubiquitin subgroup
Solyc09g007440	2.30889	9.79618e-20	1.69e-18	ATP-dependent RNA helicase (AHRD V1 ***- A1EC69_RAT)%3B contains Interpro domain(s) IPR011545 DNA/RNA helicase%2C DEAD/DEAH box type%2C N-terminal
Solyc11g006250	2.30885	0.000417728	0.00102092	GDSL esterase/lipase At5g33370 (AHRD V1 ***- GDL79_ARATH)%3B contains Interpro domain(s) IPR001087 Lipase%2C GDSL
Solyc09g092380	2.30867	4.91637e-22	1.05198e-20	Adenosylhomocysteinase (AHRD V1 **** Q2XTD0_SOLTU)%3B contains Interpro domain(s) IPR000043 S-adenosyl-L-homocysteine hydrolase
Solyc08g067840	2.30834	3.66075e-39	4.11823e-37	PsbP domain-containing protein 5%2C chloroplastic (AHRD V1 **-- PPD5_ARATH)%3B contains Interpro domain(s) IPR016123 Mog1/PsbP%2C alpha/beta/alpha sandwich
Solyc06g034150	2.30761	3.26619e-29	1.39143e-27	8-amino-7-oxononanoate synthase-like protein (AHRD V1 ***- Q9LZ63_ARATH)%3B contains Interpro domain(s) IPR004839 Aminotransferase%2C class I and II
Solyc12g010930	2.30759	8.01493e-37	6.97113e-35	50S ribosomal protein L5 (AHRD V1 ***- RL5_XANP2)%3B contains Interpro domain(s) IPR002132 Ribosomal protein L5
Solyc01g096900	2.30722	1.165e-36	9.94861e-35	DNA gyrase subunit A family protein (AHRD V1 ***- D7L923_ARALY)%3B contains Interpro domain(s) IPR005743 DNA gyrase%2C subunit A
Solyc05g050540	2.30639	1.59148e-06	5.85683e-06	Laccase 1a (AHRD V1 ***- B9IG56_POPTR)%3B contains Interpro domain(s) IPR017761 Laccase
Solyc05g015950	2.30448	2.22599e-19	3.74392e-18	Glucose-6-phosphate 1-dehydrogenase (AHRD V1 **** Q8H9C8_SOLTU)%3B contains Interpro domain(s) IPR001282 Glucose-6-phosphate dehydrogenase
Solyc06g074430	2.30438	1.09618e-40	1.42027e-38	60s acidic ribosomal protein-like protein (AHRD V1 ***- Q3HVP0_SOLTU)%3B contains Interpro domain(s) IPR001813 Ribosomal protein 60S
Solyc07g053730	2.30431	5.58844e-37	4.95236e-35	Nucleolar GTP-binding protein (AHRD V1 **** A8I0Z4_CHLRE)%3B contains Interpro domain(s) IPR012973 NOG%2C C-terminal
Solyc01g090510	2.30343	6.10019e-05	0.000173722	Pentatricopeptide repeat-containing protein (AHRD V1 ***- D7LJ24_ARALY)%3B contains Interpro domain(s) IPR002885 Pentatricopeptide repeat
Solyc01g096440	2.30229	4.27193e-07	1.72484e-06	Pentatricopeptide repeat-containing protein (AHRD V1 ***- D7L041_ARALY)%3B contains Interpro domain(s) IPR002885 Pentatricopeptide repeat
Solyc08g075090	2.30216	2.07302e-38	2.16366e-36	60S ribosomal protein L7 (AHRD V1 *-*- D7MY49_ARALY)%3B contains Interpro domain(s) IPR005998 Ribosomal protein L7%2C eukaryotic
Solyc05g009820	2.3007	6.2932e-08	2.85374e-07	Glycosyltransferase family GT8 protein (AHRD V1 ***- D0ECQ6_POPDE)%3B contains Interpro domain(s) IPR002495 Glycosyl transferase%2C family 8
Solyc04g055090	2.30021	2.1359e-16	2.66272e-15	Unknown Protein (AHRD V1)
Solyc01g068130	2.29712	4.82877e-15	5.21968e-14
Solyc05g011990	2.29557	1.14272e-27	4.30228e-26	Nucleolar protein 14 (AHRD V1 *--- A8NZ00_COPC7)%3B contains Interpro domain(s) IPR007276 Nop14-like protein
Solyc09g083370	2.29374	2.17553e-24	5.94065e-23	30S ribosomal protein S19 (AHRD V1 *-*- RS19_MYCHJ)%3B contains Interpro domain(s) IPR005713 Ribosomal protein S15%2C eukaryotic/archaeal
Solyc03g097020	2.29289	6.94987e-33	4.22547e-31	26s protease regulatory subunit (AHRD V1 *--- C4M846_ENTHI)%3B contains Interpro domain(s) IPR003959 ATPase%2C AAA-type%2C core
Solyc02g063280	2.29283	4.62283e-26	1.52367e-24	Unknown Protein (AHRD V1)
Solyc03g114890	2.29156	1.8494e-06	6.72564e-06	COBRA-like protein (AHRD V1 ***- B6E8Y8_9MYRT)%3B contains Interpro domain(s) IPR006918 Glycosyl-phosphatidyl inositol-anchored%2C plant
Solyc10g084840	2.2899	1.42544e-06	5.29453e-06	Thaumatin-like protein (AHRD V1 ***- Q9LZL8_ARATH)%3B contains Interpro domain(s) IPR001938 Thaumatin%2C pathogenesis-related
Solyc12g009600	2.28892	1.40721e-30	6.67607e-29	Thylakoid lumenal protein (AHRD V1 ***- B6SU36_MAIZE)
Solyc12g049030	2.2879	5.2021e-06	1.76189e-05	Fatty acid desaturase (AHRD V1 ***- B3SP99_CAPAN)%3B contains Interpro domain(s) IPR005804 Fatty acid desaturase%2C type 1
Solyc10g086500	2.2871	4.38009e-24	1.16722e-22	3-oxo-5-alpha-steroid 4-dehydrogenase family protein expressed (AHRD V1 ***- Q53NE6_ORYSJ)%3B contains Interpro domain(s) IPR016636 3-oxo-5-alpha-steroid 4-dehydrogenase IPR001104 3-oxo-5-alpha-steroid 4-dehydrogenase%2C C-terminal
Solyc01g091220	2.28653	7.35972e-36	5.85877e-34	40S ribosomal protein S13 (AHRD V1 ***- D7LRU2_ARALY)%3B contains Interpro domain(s) IPR000589 Ribosomal protein S15
Solyc03g119040	2.28416	8.90576e-39	9.67125e-37	Guanine nucleotide-binding protein beta subunit-like protein (AHRD V1 **-* B4FKM1_MAIZE)%3B contains Interpro domain(s) IPR020472 G-protein beta WD-40 repeat%2C region
Solyc07g042760	2.28118	6.55924e-07	2.56405e-06	Pentatricopeptide repeat-containing protein (AHRD V1 ***- D7MBJ2_ARALY)%3B contains Interpro domain(s) IPR002885 Pentatricopeptide repeat
Solyc03g117100	2.27987	3.37118e-05	0.000100228	PPPDE peptidase domain-containing protein 1 (AHRD V1 *--- PPDE1_DANRE)%3B contains Interpro domain(s) IPR008580 Protein of unknown function DUF862%2C eukaryotic
Solyc02g022830	2.2798	2.34636e-25	7.08697e-24	DNA primase/helicase (AHRD V1 **-- C9KX74_9BACE)%3B contains Interpro domain(s) IPR006154 Toprim domain%2C subgroup
Solyc02g081980	2.27957	1.02945e-08	5.19201e-08	Ectonucleoside triphosphate diphosphohydrolase 6 (AHRD V1 **-- Q6YHK4_CAVPO)%3B contains Interpro domain(s) IPR000407 Nucleoside phosphatase GDA1/CD39
Solyc02g092200	2.27955	4.90898e-07	1.96223e-06	Genomic DNA chromosome 5 TAC clone K9I9 (AHRD V1 *-*- Q9FJV9_ARATH)
Solyc09g075290	2.27932	2.19536e-41	3.12457e-39	Ribosomal protein L18 (AHRD V1 ***- C5X0Q5_SORBI)%3B contains Interpro domain(s) IPR000039 Ribosomal protein L18e
Solyc02g079820	2.27921	6.45807e-06	2.15809e-05	Pentatricopeptide repeat-containing protein (AHRD V1 ***- D7KN35_ARALY)%3B contains Interpro domain(s) IPR002885 Pentatricopeptide repeat
Solyc04g015620	2.2759	3.33359e-06	1.16887e-05
Solyc05g015980	2.27462	8.24203e-10	4.78058e-09	Unknown Protein (AHRD V1)
Solyc11g006890	2.27279	4.90882e-10	2.92583e-09	Unknown Protein (AHRD V1)
Solyc03g116510	2.27277	0.000637355	0.00149975	Unknown Protein (AHRD V1)
Solyc11g008970	2.27238	1.7293e-08	8.4627e-08	Pentatricopeptide repeat-containing protein (AHRD V1 ***- D7M977_ARALY)%3B contains Interpro domain(s) IPR002885 Pentatricopeptide repeat
Solyc02g079000	2.2718	4.39665e-38	4.30208e-36	Cell division protease ftsH homolog 4 (AHRD V1 *-*- FTSH4_SYNY3)%3B contains Interpro domain(s) IPR003959 ATPase%2C AAA-type%2C core
Solyc11g072840	2.27161	5.59708e-06	1.88648e-05	Histone H4 (AHRD V1 ***- B6T0P4_MAIZE)%3B contains Interpro domain(s) IPR001951 Histone H4
Solyc06g051970	2.27087	5.31025e-07	2.1123e-06	Calcineurin B-like calcium binding protein (AHRD V1 **** B2ZYT8_VICFA)%3B contains Interpro domain(s) IPR015757 Calcineurin B protein
Solyc01g005240	2.2702	2.68038e-38	2.70733e-36	Aspartokinase (AHRD V1 ***- B9RGY9_RICCO)%3B contains Interpro domain(s) IPR001341 Aspartate kinase region
Solyc02g032970	2.26938	4.20817e-33	2.60062e-31	Cell division protease FtsH (AHRD V1 ***- D8HK14_AMYMU)%3B contains Interpro domain(s) IPR000642 Peptidase M41
Solyc09g091740	2.26891	5.24973e-37	4.67425e-35	60S ribosomal protein L13a-like protein (AHRD V1 ***- Q3HRW1_SOLTU)%3B contains Interpro domain(s) IPR005755 Ribosomal protein L13%2C eukaryotic/archaeal
Solyc12g038090	2.26829	1.39742e-07	6.03108e-07	Unknown Protein (AHRD V1)
Solyc02g005280	2.26828	1.0286e-06	3.9047e-06	Pentatricopeptide repeat-containing protein (AHRD V1 ***- D7KHY5_ARALY)%3B contains Interpro domain(s) IPR002885 Pentatricopeptide repeat
Solyc04g009450	2.26763	8.86718e-07	3.3949e-06	Ethylene-responsive transcription factor 4 (AHRD V1 *-*- B6THY5_MAIZE)%3B contains Interpro domain(s) IPR001471 Pathogenesis-related transcriptional factor and ERF%2C DNA-binding
Solyc02g094310	2.26747	3.04824e-05	9.12625e-05	Pentatricopeptide repeat-containing protein (AHRD V1 ***- D7M5Z8_ARALY)%3B contains Interpro domain(s) IPR002885 Pentatricopeptide repeat
Solyc01g089850	2.26685	5.21549e-16	6.24098e-15	Cyclin-dependent protein kinase regulator Pho80 (AHRD V1 **** B6QI37_PENMQ)%3B contains Interpro domain(s) IPR012389 Negative regulatory factor PREG
Solyc06g082880	2.26655	5.79196e-06	1.94518e-05	Pentatricopeptide repeat-containing protein (AHRD V1 ***- D7KZF9_ARALY)%3B contains Interpro domain(s) IPR002885 Pentatricopeptide repeat
Solyc02g091640	2.26381	5.1191e-37	4.57965e-35	Endoribonuclease E-like protein (AHRD V1 **-- Q656E2_ORYSJ)
Solyc03g112070	2.26374	2.38284e-30	1.11359e-28	Phosphoglycerate dehydrogenase (AHRD V1 **** D2D316_GOSHI)%3B contains Interpro domain(s) IPR015508 D-3-phosphogylcerate Dehydrogenase
Solyc03g019780	2.26365	2.04493e-40	2.59582e-38	40S ribosomal protein SA (AHRD V1 ***- B6T6X2_MAIZE)%3B contains Interpro domain(s) IPR005707 Ribosomal protein S2%2C eukaryotic/archaeal
Solyc02g091180	2.26358	0.00066447	0.00155731	cDNA clone J100026I16 full insert sequence (AHRD V1 **-- B7FA06_ORYSJ)
Solyc05g010620	2.26287	1.56728e-06	5.77342e-06	Pentatricopeptide repeat-containing protein (AHRD V1 ***- D7KWW7_ARALY)%3B contains Interpro domain(s) IPR002885 Pentatricopeptide repeat
Solyc03g113450	2.26285	7.56385e-08	3.39308e-07	Receptor like kinase%2C RLK
Solyc01g106580	2.26282	8.15682e-22	1.7122e-20	Unknown Protein (AHRD V1)
Solyc03g113610	2.2622	4.34414e-21	8.53696e-20	Protein CLP1 homolog (AHRD V1 **-- CLP1_BRUMA)%3B contains Interpro domain(s) IPR012581 NUC156
Solyc09g066430	2.26013	1.97403e-35	1.49541e-33	60S ribosomal protein L14 (AHRD V1 ***- D7MEJ2_ARALY)%3B contains Interpro domain(s) IPR002784 Ribosomal protein L14
Solyc09g075680	2.25965	4.19302e-06	1.4417e-05	Gibberellin receptor GID1L2 (AHRD V1 **-- B6T2M3_MAIZE)%3B contains Interpro domain(s) IPR013094 Alpha/beta hydrolase fold-3
Solyc04g008880	2.25901	1.43756e-06	5.33427e-06	UDP-N-acetylmuramoyl-tripeptide--D-alanyl-D-alanine ligase (AHRD V1 **** A3DE30_CLOTH)%3B contains Interpro domain(s) IPR005863 UDP-N-acetylmuramoyl-tripeptide-D-alanyl-D-alanine ligase
Solyc01g073640	2.25699	1.26967e-07	5.51139e-07	Uncharacterized oxidoreductase Mb1385 (AHRD V1 ***- Y1385_MYCBO)%3B contains Interpro domain(s) IPR002347 Glucose/ribitol dehydrogenase
Solyc11g005770	2.25492	8.68745e-13	7.25705e-12	Pectinesterase family protein (AHRD V1 ***- D7MRW1_ARALY)%3B contains Interpro domain(s) IPR000070 Pectinesterase%2C catalytic
Solyc04g012060	2.25366	1.84477e-24	5.07432e-23	Ribonucleoside-diphosphate reductase (AHRD V1 **** Q9ZR56_TOBAC)%3B contains Interpro domain(s) IPR013346 Ribonucleoside-diphosphate reductase%2C alpha subunit
Solyc10g086650	2.25325	7.84445e-07	3.02491e-06	Glyoxal oxidase (AHRD V1 ***- C8CPQ3_VITVI)%3B contains Interpro domain(s) IPR009880 Glyoxal oxidase%2C N-terminal
Solyc09g011260	2.25317	0.00555014	0.0107108	CHP-rich zinc finger protein-like (AHRD V1 *--- Q8H5Y9_ORYSJ)%3B contains Interpro domain(s) IPR004146 DC1
Solyc10g054660	2.25305	8.41933e-14	7.93648e-13	Unknown Protein (AHRD V1)
Solyc04g026100	2.25196	6.78058e-39	7.49334e-37	30S ribosomal protein S9 (AHRD V1 ***- C5JX04_AJEDS)%3B contains Interpro domain(s) IPR000754 Ribosomal protein S9
Solyc11g042820	2.25187	8.81431e-05	0.000243952	Nitrate transporter (AHRD V1 ***- Q7XAK5_PRUPE)%3B contains Interpro domain(s) IPR000109 TGF-beta receptor%2C type I/II extracellular region
Solyc05g015850	2.25127	9.44135e-06	3.06399e-05	WRKY transcription factor-b (AHRD V1 **** Q5DJU0_CAPAN)%3B contains Interpro domain(s) IPR003657 DNA-binding WRKY
Solyc04g008810	2.25042	5.33546e-34	3.59273e-32	40S ribosomal protein S26 (AHRD V1 ***- B6TXN6_MAIZE)%3B contains Interpro domain(s) IPR000892 Ribosomal protein S26e
Solyc10g080220	2.24917	8.51392e-05	0.000236264	Pentatricopeptide repeat-containing protein (AHRD V1 ***- D7LQC4_ARALY)%3B contains Interpro domain(s) IPR002885 Pentatricopeptide repeat
Solyc03g121330	2.24899	4.36422e-35	3.17793e-33	60S ribosomal protein L28 (AHRD V1 ***- B3TLS3_ELAGV)%3B contains Interpro domain(s) IPR002672 Ribosomal protein L28e
Solyc07g056400	2.24894	2.01076e-08	9.74617e-08	Ribosomal protein S6 kinase alpha-6 (AHRD V1 *-** KS6A6_HUMAN)%3B contains Interpro domain(s) IPR002290 Serine/threonine protein kinase
Solyc01g006660	2.24879	2.41903e-05	7.37287e-05	Subtilisin-like serine protease (AHRD V1 **-* Q8LAE1_ARATH)%3B contains Interpro domain(s) IPR015500 Peptidase S8%2C subtilisin-related
Solyc10g007320	2.24854	8.19564e-29	3.36918e-27	Uroporphyrinogen decarboxylase (AHRD V1 **** D7L387_ARALY)%3B contains Interpro domain(s) IPR006361 Uroporphyrinogen decarboxylase HemE
Solyc01g096250	2.24718	1.09122e-11	7.96143e-11	Unknown Protein (AHRD V1)
Solyc02g072020	2.24597	0.000131006	0.000351829	Pentatricopeptide repeat-containing protein (AHRD V1 ***- D7M9E6_ARALY)%3B contains Interpro domain(s) IPR002885 Pentatricopeptide repeat
Solyc07g047790	2.2452	1.16363e-31	6.19294e-30	Chaperone protein htpG (AHRD V1 ***- HTPG_IDILO)%3B contains Interpro domain(s) IPR001404 Heat shock protein Hsp90
Solyc01g099910	2.24494	2.19816e-19	3.70043e-18	Epoxide hydrolase (AHRD V1 ***- B3VMR4_NICBE)%3B contains Interpro domain(s) IPR000639 Epoxide hydrolase-like
Solyc10g074870	2.24413	1.11045e-20	2.09458e-19	KH domain containing RNA binding signal transduction associated 1 (AHRD V1 *--- Q29RQ2_BOVIN)%3B contains Interpro domain(s) IPR004087 K Homology
Solyc06g053620	2.24377	1.85904e-09	1.03361e-08	Calcium-dependent protein kinase 2 (AHRD V1 **** B4FZS4_MAIZE)%3B contains Interpro domain(s) IPR002290 Serine/threonine protein kinase
Solyc02g094390	2.24351	8.68756e-18	1.24972e-16	Palmitoyltransferase-like protein (AHRD V1 *-** C6YXK4_ORYSJ)%3B contains Interpro domain(s) IPR001594 Zinc finger%2C DHHC-type
Solyc11g068690	2.24338	3.95867e-20	7.083e-19	Lrr%2C resistance protein fragment
Solyc01g056940	2.24304	3.36072e-32	1.86798e-30	Ubiquitin (AHRD V1 ***- D3PHG3_9MAXI)%3B contains Interpro domain(s) IPR019956 Ubiquitin subgroup
Solyc04g078710	2.24231	2.34362e-07	9.81928e-07	Subtilisin-like protease (AHRD V1 **-- O82777_SOLLC)%3B contains Interpro domain(s) IPR015500 Peptidase S8%2C subtilisin-related
Solyc01g005250	2.24218	2.33122e-32	1.32316e-30	Aspartate-semialdehyde dehydrogenase (AHRD V1 ***- B6TWW1_MAIZE)%3B contains Interpro domain(s) IPR005986 Aspartate-semialdehyde dehydrogenase%2C bacterial
Solyc06g048900	2.2418	3.36994e-07	1.38023e-06	Pentatricopeptide repeat-containing protein (AHRD V1 ***- D7KZF9_ARALY)%3B contains Interpro domain(s) IPR002885 Pentatricopeptide repeat
Solyc08g006890	2.24161	2.62121e-30	1.21592e-28	Tubulin alpha-3 chain (AHRD V1 ***- B6SPX4_MAIZE)%3B contains Interpro domain(s) IPR002452 Alpha tubulin
Solyc04g025650	2.23934	1.24104e-10	7.99571e-10	Monooxygenase FAD-binding (AHRD V1 **-- A1TC37_MYCVP)%3B contains Interpro domain(s) IPR003042 Aromatic-ring hydroxylase-like
Solyc01g110960	2.23864	6.17897e-16	7.32855e-15	Glutamic acid-rich protein (AHRD V1 ***- Q570K7_ARATH)
Solyc04g074750	2.23726	2.28495e-35	1.71599e-33	Polyadenylate-binding protein 1-A (AHRD V1 **-* PAP1A_DICDI)%3B contains Interpro domain(s) IPR000504 RNA recognition motif%2C RNP-1
Solyc06g051040	2.23511	0.000169605	0.00044627	Mitotic checkpoint serine/threonine-protein kinase BUB1 (AHRD V1 *--- BUB1_MOUSE)%3B contains Interpro domain(s) IPR013212 Mad3/BUB1 homology region 1
Solyc04g072170	2.23344	1.42886e-06	5.30515e-06	Pentatricopeptide repeat-containing protein (AHRD V1 ***- D7KJF2_ARALY)%3B contains Interpro domain(s) IPR002885 Pentatricopeptide repeat
Solyc01g100800	2.2332	3.53412e-05	0.000104692	Pentatricopeptide repeat-containing protein (AHRD V1 ***- D7KB47_ARALY)%3B contains Interpro domain(s) IPR002885 Pentatricopeptide repeat
Solyc12g008610	2.23238	2.63885e-06	9.38939e-06	Unknown Protein (AHRD V1)
Solyc06g062430	2.23233	0.00146159	0.00320108	Inositol oxygenase (AHRD V1 **** A5FF81_FLAJ1)%3B contains Interpro domain(s) IPR007828 Protein of unknown function DUF706
Solyc03g111680	2.22351	4.24133e-15	4.61122e-14	DNA polymerase III gamma/tau subunit (AHRD V1 *-*- B0JGE9_MICAN)%3B contains Interpro domain(s) IPR012763 DNA polymerase III%2C subunit gamma/ tau
Solyc07g055670	2.22169	1.30631e-06	4.87711e-06	Receptor-like kinase (AHRD V1 **** B6EB06_NICGU)%3B contains Interpro domain(s) IPR002290 Serine/threonine protein kinase
Solyc10g007440	2.22079	3.26357e-32	1.82478e-30	Zinc finger (Ran-binding) family protein (AHRD V1 *--- D7KYC9_ARALY)
Solyc01g097940	2.22001	4.83438e-05	0.000140203	Cysteine synthase (AHRD V1 ***- Q9FSF5_TOBAC)%3B contains Interpro domain(s) IPR001926 Pyridoxal phosphate-dependent enzyme%2C beta subunit
Solyc03g033460	2.21982	7.73126e-12	5.74781e-11	Oligopeptide transporter 9 (AHRD V1 **** B6SVF4_MAIZE)%3B contains Interpro domain(s) IPR004648 Tetrapeptide transporter%2C OPT1/isp4
Solyc09g008260	2.21798	2.44573e-34	1.70032e-32	Unknown Protein (AHRD V1)
Solyc05g054140	2.21755	1.69689e-21	3.42422e-20	Nucleic acid-binding OB-fold (AHRD V1 ***- A2Q5X5_MEDTR)%3B contains Interpro domain(s) IPR005576 RNA polymerase Rpb7%2C N-terminal
Solyc08g082450	2.21736	4.81051e-21	9.40427e-20	Lipase class 3 family protein (AHRD V1 ***- D7LYU5_ARALY)%3B contains Interpro domain(s) IPR002921 Lipase%2C class 3
Solyc03g078640	2.21588	1.19835e-13	1.10685e-12	Unknown Protein (AHRD V1)
Solyc06g071880	2.21341	2.22319e-39	2.56239e-37	60S ribosomal protein L17 (AHRD V1 ***- D7KV33_ARALY)%3B contains Interpro domain(s) IPR005721 Ribosomal protein L22/L17%2C eukaryotic/archaeal
Solyc04g081580	2.21318	2.42527e-28	9.63289e-27	ATP dependent RNA helicase (AHRD V1 **** B3LTF9_YEAS1)%3B contains Interpro domain(s) IPR011545 DNA/RNA helicase%2C DEAD/DEAH box type%2C N-terminal
Solyc09g008060	2.21287	1.44311e-10	9.2347e-10	UDP-glucosyltransferase family 1 protein (AHRD V1 **** C6KI44_CITSI)%3B contains Interpro domain(s) IPR002213 UDP-glucuronosyl/UDP-glucosyltransferase
Solyc06g073660	2.21176	5.64153e-08	2.57798e-07	Non-specific lipid-transfer protein-like protein (AHRD V1 *-*- C0KHK0_9CARY)%3B contains Interpro domain(s) IPR013770 Plant lipid transfer protein and hydrophobic protein%2C helical
Solyc06g007530	2.21089	1.03949e-06	3.94283e-06	B3 domain-containing protein Os05g0481400 (AHRD V1 ***- Y5814_ORYSJ)%3B contains Interpro domain(s) IPR003340 Transcriptional factor B3
Solyc06g053820	2.20917	8.40202e-34	5.53855e-32	30S ribosomal protein S19 (AHRD V1 *-*- RS19_SHEAM)%3B contains Interpro domain(s) IPR005713 Ribosomal protein S15%2C eukaryotic/archaeal
Solyc10g008570	2.2088	1.14272e-07	4.98914e-07	Pentatricopeptide repeat-containing protein (AHRD V1 ***- D7KCG0_ARALY)%3B contains Interpro domain(s) IPR010989 t-SNARE
Solyc01g010580	2.20869	9.48046e-37	8.20781e-35	Ribosomal protein (AHRD V1 ***- B3TM27_ELAGV)%3B contains Interpro domain(s) IPR002942 RNA-binding S4 IPR018079 Ribosomal protein S4%2C conserved site IPR001912 Ribosomal protein S4
Solyc06g069740	2.20845	0.000759873	0.0017607	Calmodulin-like protein (AHRD V1 *-*- B6TXW9_MAIZE)%3B contains Interpro domain(s) IPR011992 EF-Hand type
Solyc02g082360	2.20485	4.78297e-16	5.7417e-15	Translation initiation factor (AHRD V1 ***- A6ZWQ9_YEAS7)%3B contains Interpro domain(s) IPR002769 Translation initiation factor IF6
Solyc01g095110	2.20458	4.09578e-12	3.14713e-11	Pentatricopeptide repeat-containing protein (AHRD V1 ***- D7LSA9_ARALY)%3B contains Interpro domain(s) IPR002885 Pentatricopeptide repeat
Solyc04g078810	2.20444	2.94989e-14	2.91682e-13	Remorin (AHRD V1 ***- Q00M66_SOYBN)%3B contains Interpro domain(s) IPR005516 Remorin%2C C-terminal region
Solyc06g069890	2.20432	5.59796e-21	1.09096e-19	Nucleosome assembly protein family (AHRD V1 **-- A9RDJ7_PHYPA)%3B contains Interpro domain(s) IPR002164 Nucleosome assembly protein (NAP)
Solyc09g009030	2.20363	3.04641e-26	1.02385e-24	Histone deacetylase 2a-like (AHRD V1 **** Q2XTE1_SOLTU)%3B contains Interpro domain(s) IPR007087 Zinc finger%2C C2H2-type
Solyc07g017540	2.20321	1.31165e-05	4.15479e-05	Rad51 DNA recombination/repair protein (AHRD V1 ***- B7G0B3_PHATR)%3B contains Interpro domain(s) IPR011941 DNA repair protein RAD51
Solyc09g092240	2.20309	2.60214e-33	1.635e-31	Small subunit processome component 20 homolog (AHRD V1 **-- UTP20_MOUSE)%3B contains Interpro domain(s) IPR011430 Down-regulated in metastasis
Solyc12g008760	2.20201	1.95717e-25	5.95938e-24	Protein arginine N-methyltransferase 1 (AHRD V1 ***- B6TIG8_MAIZE)
Solyc04g080820	2.20155	3.25315e-06	1.1428e-05	Cytokinin oxidase/dehydrogenase (AHRD V1 **** C3VPM7_SOLTU)%3B contains Interpro domain(s) IPR015345 Cytokinin dehydrogenase 1%2C FAD and cytokinin binding
Solyc07g065090	2.20146	6.39682e-10	3.75553e-09	Polygalacturonase inhibitor protein (AHRD V1 ***- Q40160_SOLLC)%3B contains Interpro domain(s) IPR013210 Leucine-rich repeat%2C N-terminal
Solyc11g020890	2.20145	3.96606e-19	6.51315e-18	40S ribosomal protein S29 (AHRD V1 ***- A2ZG71_ORYSI)%3B contains Interpro domain(s) IPR001209 Ribosomal protein S14
Solyc06g005560	2.19951	3.96903e-07	1.6105e-06	Expansin-1 (AHRD V1 ***- Q6RX69_PETHY)%3B contains Interpro domain(s) IPR007112 Expansin 45%2C endoglucanase-like IPR007117 Pollen allergen/expansin%2C C-terminal
Solyc10g074680	2.19857	3.12195e-05	9.33356e-05	SCARECROW (AHRD V1 *--- Q5NDC9_CUCSA)%3B contains Interpro domain(s) IPR005202 GRAS transcription factor
Solyc07g053470	2.1979	9.65305e-38	9.06759e-36	GTP binding/translation elongation factor protein (AHRD V1 **** C1E924_9CHLO)%3B contains Interpro domain(s) IPR006298 GTP-binding protein TypA
Solyc05g010680	2.19781	8.50418e-06	2.77809e-05	Abhydrolase domain-containing protein FAM108B1 (AHRD V1 **-- C0HAS5_SALSA)%3B contains Interpro domain(s) IPR000073 Alpha/beta hydrolase fold-1
Solyc08g075160	2.1969	2.22116e-35	1.67586e-33	Bifunctional purine biosynthesis protein purH (AHRD V1 ***- D4Q5I3_LISMO)%3B contains Interpro domain(s) IPR002695 AICARFT/IMPCHase bienzyme
Solyc06g005140	2.19646	1.09724e-20	2.07382e-19	Pentatricopeptide repeat-containing protein (AHRD V1 ***- D7M3C7_ARALY)%3B contains Interpro domain(s) IPR002885 Pentatricopeptide repeat
Solyc10g083280	2.19561	1.39298e-37	1.28284e-35	30S ribosomal protein S11 (AHRD V1 ***- RS11_CAUSK)%3B contains Interpro domain(s) IPR018102 Ribosomal S11%2C conserved site
Solyc04g008790	2.19496	1.24191e-17	1.75295e-16	LOC563247 protein (Fragment) (AHRD V1 **-- Q3B7F4_DANRE)%3B contains Interpro domain(s) IPR002143 Ribosomal protein L1
Solyc10g083510	2.19312	0.00447908	0.00884104	Growth-regulating factor 2 (AHRD V1 **-- Q6AWY7_ORYSJ)%3B contains Interpro domain(s) IPR014977 WRC
Solyc06g054310	2.19286	0.000197518	0.00051339	Unknown Protein (AHRD V1)
Solyc12g062200	2.19209	6.44629e-08	2.92034e-07	Unknown Protein (AHRD V1)
Solyc03g112960	2.19158	1.24302e-05	3.95406e-05	Pectinesterase (AHRD V1 ***- B9GXZ7_POPTR)
Solyc06g075800	2.19052	2.17426e-31	1.11606e-29	Histone H2B (AHRD V1 ***- Q2XPW1_SOLTU)%3B contains Interpro domain(s) IPR000558 Histone H2B
Solyc03g093700	2.18987	3.46807e-06	1.21128e-05	Histone-lysine N-methyltransferase%2C H3 lysine-9 specific 5 (AHRD V1 *-** EHMT1_HUMAN)%3B contains Interpro domain(s) IPR003105 SRA-YDG
Solyc06g072690	2.18986	3.46764e-09	1.85339e-08	Mitotic-spindle organizing protein associated with a ring of gamma-tubulin 1B (AHRD V1 ***- MZT1B_ARATH)
Solyc09g091220	2.18928	5.07717e-05	0.000146723	F-box family protein (AHRD V1 ***- B9HCS6_POPTR)%3B contains Interpro domain(s) IPR001810 Cyclin-like F-box
Solyc09g091910	2.18761	4.00459e-08	1.86639e-07	Purple acid phosphatase (AHRD V1 **** A5YBN1_TOBAC)%3B contains Interpro domain(s) IPR015914 Purple acid phosphatase%2C N-terminal
Solyc01g099830	2.1873	5.28189e-30	2.37964e-28	60S ribosomal protein L22-2 (AHRD V1 ***- D7L3W0_ARALY)%3B contains Interpro domain(s) IPR002671 Ribosomal protein L22e
Solyc09g075030	2.18554	8.73465e-31	4.21846e-29	Nucleolar protein (NOP16) involved in 60S ribosomal subunit biogenesis (ISS) (AHRD V1 *-*- Q01AF2_OSTTA)%3B contains Interpro domain(s) IPR019002 Ribosome biogenesis protein Nop16
Solyc09g009020	2.18524	3.80531e-19	6.26558e-18	Enolase (AHRD V1 ***- C5J0G6_TOBAC)%3B contains Interpro domain(s) IPR000941 Enolase
Solyc10g085120	2.18335	3.22777e-09	1.73356e-08	Receptor like kinase%2C RLK
Solyc02g079370	2.18109	3.30703e-05	9.83989e-05	Cyclin-D6-1 (AHRD V1 **** CCD61_ORYSJ)%3B contains Interpro domain(s) IPR015451 Cyclin D
Solyc12g088050	2.18102	9.80927e-13	8.15429e-12	Rhamnogalacturonate lyase (AHRD V1 ***- A3XLZ2_LEEBM)%3B contains Interpro domain(s) IPR010325 Rhamnogalacturonate lyase
Solyc05g055230	2.18093	3.63443e-34	2.48291e-32	40S ribosomal protein S17-like protein (AHRD V1 ***- Q3HRX4_SOLTU)%3B contains Interpro domain(s) IPR018273 Ribosomal protein S17e%2C conserved site
Solyc03g031730	2.18006	1.78804e-10	1.13104e-09	Beta-glucosidase 47 (AHRD V1 **** D7MEP5_ARALY)%3B contains Interpro domain(s) IPR001360 Glycoside hydrolase%2C family 1
Solyc01g095160	2.17879	2.2932e-05	7.00753e-05	Pentatricopeptide repeat-containing protein (AHRD V1 ***- D7MB20_ARALY)%3B contains Interpro domain(s) IPR002885 Pentatricopeptide repeat
Solyc05g012680	2.17764	2.83429e-14	2.81288e-13
Solyc10g086010	2.17741	2.09001e-33	1.33102e-31	60S ribosomal protein L4/L1 (AHRD V1 ***- D7L8A9_ARALY)%3B contains Interpro domain(s) IPR002136 Ribosomal protein L4/L1e
Solyc02g085810	2.17513	2.0166e-22	4.50485e-21	HEAT repeat containing 5B (AHRD V1 *--- B9EK47_HUMAN)%3B contains Interpro domain(s) IPR011989 Armadillo-like helical
Solyc09g091650	2.17508	1.18911e-10	7.67957e-10	Replication factor C large subunit (AHRD V1 *-*- B8D4I5_DESK1)%3B contains Interpro domain(s) IPR003959 ATPase%2C AAA-type%2C core
Solyc09g061340	2.17427	8.05062e-10	4.67823e-09	Pentatricopeptide repeat-containing protein (AHRD V1 ***- D7L041_ARALY)%3B contains Interpro domain(s) IPR002885 Pentatricopeptide repeat
Solyc06g062370	2.17377	2.44111e-06	8.72549e-06	Acid phosphatase (AHRD V1 **-- O49855_SOYBN)%3B contains Interpro domain(s) IPR010028 Acid phosphatase%2C plant
Solyc05g054820	2.17358	0.000380582	0.000937951	Exocyst complex protein EXO70 (AHRD V1 *--- EXO70_CANGA)%3B contains Interpro domain(s) IPR004140 Exo70 exocyst complex subunit
Solyc05g053440	2.17314	8.13856e-33	4.85394e-31	60S ribosomal protein L29 (AHRD V1 ***- B6SPH4_MAIZE)%3B contains Interpro domain(s) IPR002673 Ribosomal protein L29e
Solyc11g062440	2.17299	5.83133e-09	3.03136e-08	Laccase (AHRD V1 ***- Q9AUI0_PINTA)%3B contains Interpro domain(s) IPR017760 L-ascorbate oxidase%2C plants
Solyc12g008720	2.16917	5.5528e-31	2.7598e-29	60S ribosomal protein L31 (AHRD V1 ***- B6VC52_VERFO)%3B contains Interpro domain(s) IPR000054 Ribosomal protein L31e
Solyc04g079150	2.16897	1.13563e-05	3.63337e-05	Pentatricopeptide repeat-containing protein (AHRD V1 ***- D7KRI2_ARALY)%3B contains Interpro domain(s) IPR002885 Pentatricopeptide repeat
Solyc06g066160	2.16877	0.0120733	0.0215959	Pinoresinol-lariciresinol reductase (AHRD V1 **** Q4R0I0_9ROSI)%3B contains Interpro domain(s) IPR008030 NmrA-like
Solyc04g015470	2.16839	6.16646e-11	4.11982e-10	Phosphatidylinositol-4-phosphate 5-kinase family protein (AHRD V1 **** D7L735_ARALY)%3B contains Interpro domain(s) IPR017163 Phosphatidylinositol-4-phosphate 5-kinase%2C plant
Solyc02g021400	2.16838	3.30591e-32	1.84297e-30	40S ribosomal protein S28 (AHRD V1 ***- B6T1V2_MAIZE)%3B contains Interpro domain(s) IPR000289 Ribosomal protein S28e
Solyc06g052020	2.1683	4.92808e-05	0.000142678	Unknown Protein (AHRD V1)
Solyc05g023900	2.16803	3.39875e-06	1.18972e-05	Pentatricopeptide repeat-containing protein (AHRD V1 ***- D7M582_ARALY)%3B contains Interpro domain(s) IPR002885 Pentatricopeptide repeat
Solyc08g077120	2.16601	5.92034e-23	1.38512e-21	Pentatricopeptide repeat-containing protein At5g46580%2C chloroplastic (AHRD V1 ***- PP420_ARATH)
Solyc02g065770	2.16451	3.97268e-11	2.71597e-10	COBRA-like protein 4 (AHRD V1 ***- B6SST3_MAIZE)%3B contains Interpro domain(s) IPR017391 COBRA-like
Solyc01g079240	2.16387	1.66165e-19	2.81492e-18	Long-chain-fatty-acid--CoA ligase family protein (AHRD V1 **** D7LGL1_ARALY)%3B contains Interpro domain(s) IPR000873 AMP-dependent synthetase and ligase
Solyc01g094750	2.162	1.0954e-07	4.79145e-07	Cytochrome P450
Solyc04g008870	2.16045	2.01157e-09	1.11053e-08	MYB transcription factor (AHRD V1 **** Q9FNN6_ARATH)%3B contains Interpro domain(s) IPR006447 Myb-like DNA-binding region%2C SHAQKYF class
Solyc04g073990	2.16037	8.95752e-09	4.55316e-08	Annexin (AHRD V1 ***- Q42657_CAPAN)%3B contains Interpro domain(s) IPR009118 Annexin%2C type plant
Solyc11g007010	2.15999	8.93905e-24	2.32601e-22	Proline-%2C glutamic acid- and leucine-rich protein 1 (AHRD V1 *--- PELP1_XENLA)%3B contains Interpro domain(s) IPR016024 Armadillo-type fold
Solyc06g073790	2.15975	1.35381e-26	4.65824e-25	40S ribosomal protein S11 (AHRD V1 ***- D7MBM0_ARALY)%3B contains Interpro domain(s) IPR000266 Ribosomal protein S17
Solyc01g068530	2.15903	2.9184e-29	1.24893e-27	30S ribosomal protein S9 (AHRD V1 ***- C5JX04_AJEDS)%3B contains Interpro domain(s) IPR000754 Ribosomal protein S9
Solyc03g025740	2.15896	9.74172e-16	1.13183e-14	CCHC zinc finger protein (AHRD V1 *--- Q9GRG8_9TRYP)%3B contains Interpro domain(s) IPR013084 Zinc finger%2C CCHC retroviral-type
Solyc07g054580	2.15847	6.89777e-07	2.68632e-06	GH3 family protein (AHRD V1 ***- B9N2A3_POPTR)%3B contains Interpro domain(s) IPR004993 GH3 auxin-responsive promoter
Solyc12g055970	2.15834	4.47514e-09	2.35635e-08	Endoglucanase 1 (AHRD V1 ***- B6U0J0_MAIZE)%3B contains Interpro domain(s) IPR001701 Glycoside hydrolase%2C family 9
Solyc09g097890	2.15746	6.57317e-09	3.39445e-08	Membrane protein (AHRD V1 **-- B6ST21_MAIZE)%3B contains Interpro domain(s) IPR006593 Cytochrome b561/ferric reductase transmembrane
Solyc06g071320	2.15643	0.000261765	0.000665103	Genomic DNA chromosome 5 P1 clone MQB2 (AHRD V1 **-- Q9FM06_ARATH)
Solyc09g074490	2.15602	0.000141358	0.000377443	Unknown Protein (AHRD V1)
Solyc07g065340	2.15559	3.53833e-07	1.44699e-06	Serine acetyltransferase (AHRD V1 **** Q39533_CITLA)%3B contains Interpro domain(s) IPR005881 Serine O-acetyltransferase
Solyc01g066610	2.15427	1.70831e-06	6.25492e-06	Fanconi anemia group I protein (AHRD V1 *--- FANCI_HUMAN)
Solyc11g011010	2.15409	2.85529e-15	3.17223e-14	Erwinia induced protein 2 (AHRD V1 ***- Q84XG6_SOLTU)
Solyc06g073370	2.15217	8.85763e-34	5.7982e-32	40S ribosomal protein S18 (AHRD V1 ***- B4G286_MAIZE)%3B contains Interpro domain(s) IPR001892 Ribosomal protein S13
Solyc06g072490	2.15173	8.01714e-33	4.81208e-31	40S ribosomal protein S1 (AHRD V1 ***- RS3A_LACBS)%3B contains Interpro domain(s) IPR001593 Ribosomal protein S3Ae
Solyc06g053850	2.15023	2.47136e-07	1.03108e-06	Pentatricopeptide repeat-containing protein (AHRD V1 ***- D7M3D7_ARALY)%3B contains Interpro domain(s) IPR002885 Pentatricopeptide repeat
Solyc06g011280	2.14963	3.67474e-27	1.3125e-25	Elongation factor 1-gamma (AHRD V1 ***- B7SDI2_ORYSJ)%3B contains Interpro domain(s) IPR001662 Translation elongation factor EF1B%2C gamma chain%2C conserved
Solyc04g078140	2.14957	4.30389e-07	1.73588e-06	Cytochrome B5 (AHRD V1 **** Q9ZSP7_PETHY)%3B contains Interpro domain(s) IPR001199 Cytochrome b5
Solyc01g008160	2.14857	1.21202e-27	4.54494e-26	Tetratricopeptide repeat-containing protein (AHRD V1 ***- D7L8H9_ARALY)%3B contains Interpro domain(s) IPR011990 Tetratricopeptide-like helical
Solyc09g007050	2.14734	1.83182e-06	6.66947e-06	Pentatricopeptide repeat-containing protein (AHRD V1 ***- D7LJR5_ARALY)%3B contains Interpro domain(s) IPR002885 Pentatricopeptide repeat
Solyc00g029190	2.1468	0.000112688	0.000305851	S-adenosyl-L-methionine salicylic acid carboxyl methyltransferase (AHRD V1 **** A7XZE9_9MAGN)%3B contains Interpro domain(s) IPR005299 SAM dependent carboxyl methyltransferase
Solyc03g007050	2.14676	3.0604e-05	9.15975e-05	Receptor like kinase%2C RLK
Solyc01g096800	2.14533	3.46324e-26	1.1577e-24	SWI4 1 Peter Pan-like protein suppressor (AHRD V1 **-- D0MSA0_PHYIN)%3B contains Interpro domain(s) IPR007109 Brix domain
Solyc06g073310	2.14505	2.80081e-33	1.75396e-31	Ribosomal L9-like protein (AHRD V1 ***- B3TLR1_ELAGV)%3B contains Interpro domain(s) IPR000702 Ribosomal protein L6
Solyc10g009400	2.14458	9.79338e-12	7.18143e-11	FAM86A (AHRD V1 **-- B5XFD7_SALSA)%3B contains Interpro domain(s) IPR019410 Methyltransferase-16%2C putative
Solyc11g010350	2.14359	1.7437e-12	1.39757e-11	Glucan 1 3-beta-glucosidase (AHRD V1 *-*- C1H4T0_PARBA)%3B contains Interpro domain(s) IPR001547 Glycoside hydrolase%2C family 5
Solyc03g123630	2.14334	4.50053e-25	1.31088e-23	Pectinesterase (AHRD V1 ***- Q564D7_SOLLC)%3B contains Interpro domain(s) IPR000070 Pectinesterase%2C catalytic
Solyc07g024070	2.14297	5.72548e-09	2.97963e-08	Ubiquitin-conjugating enzyme E2 T (AHRD V1 *-*- C1BZC6_ESOLU)%3B contains Interpro domain(s) IPR000608 Ubiquitin-conjugating enzyme%2C E2
Solyc07g008600	2.14267	1.08303e-05	3.47868e-05	LRR receptor-like serine/threonine-protein kinase%2C RLP
Solyc09g010390	2.1418	2.73191e-17	3.72997e-16	Unknown Protein (AHRD V1)
Solyc10g081240	2.14156	2.45608e-32	1.38983e-30	Protein grpE (AHRD V1 *-*- B0CAY8_ACAM1)%3B contains Interpro domain(s) IPR000740 GrpE nucleotide exchange factor
Solyc09g014610	2.14136	4.21164e-06	1.44783e-05	C4-dicarboxylate transporter/malic acid transport family protein (AHRD V1 **** D7M2F7_ARALY)%3B contains Interpro domain(s) IPR004695 C4-dicarboxylate transporter/malic acid transport protein
Solyc12g011400	2.14092	5.29085e-07	2.10547e-06	Pentatricopeptide repeat-containing protein (AHRD V1 ***- D7M3D7_ARALY)%3B contains Interpro domain(s) IPR002885 Pentatricopeptide repeat
Solyc05g056330	2.14057	6.65161e-14	6.34656e-13	Transposase (Fragment) (AHRD V1 *-*- Q6US98_9ASPA)%3B contains Interpro domain(s) IPR002559 Transposase%2C IS4-like
Solyc08g066610	2.13955	4.55003e-21	8.91815e-20	EPIDERMAL PATTERNING FACTOR-like protein 9 (AHRD V1 *-*- EPFL9_ARATH)
Solyc03g020040	2.13949	0.00112305	0.00250877	Proteinase inhibitor II (AHRD V1 ***- B3F0C1_TOBAC)%3B contains Interpro domain(s) IPR003465 Proteinase inhibitor I20%2C Pin2
Solyc02g086780	2.13814	1.50931e-16	1.91074e-15	Unknown Protein (AHRD V1)%3B contains Interpro domain(s) IPR018788 Proteasome assembly chaperone 3
Solyc06g008220	2.13614	9.65589e-33	5.6395e-31	DAG protein (AHRD V1 **-- B6TEQ2_MAIZE)
Solyc07g006530	2.13607	6.67375e-32	3.61325e-30	Adenylosuccinate lyase (AHRD V1 ***- Q6T7E9_TOBAC)%3B contains Interpro domain(s) IPR004769 Adenylosuccinate lyase
Solyc02g070990	2.13584	7.84663e-05	0.000219204	Chlorophyll a/b binding protein (AHRD V1 **** Q41422_SOLTU)%3B contains Interpro domain(s) IPR001344 Chlorophyll A-B binding protein
Solyc03g118970	2.13579	5.70291e-26	1.85044e-24	Multidrug resistance protein mdtK (AHRD V1 ***- MDTK_CITK8)%3B contains Interpro domain(s) IPR015521 MATE family transporter related protein
Solyc11g008510	2.13562	9.00477e-32	4.84735e-30	60S ribosomal protein L38 (AHRD V1 ***- D7LK18_ARALY)%3B contains Interpro domain(s) IPR002675 Ribosomal protein L38e
Solyc05g054580	2.13378	1.45185e-32	8.34824e-31	60S acidic ribosomal protein P0 (AHRD V1 ***- D7L9V8_ARALY)%3B contains Interpro domain(s) IPR001790 Ribosomal protein L10
Solyc02g090070	2.13339	9.02822e-15	9.49682e-14	Phototropic-responsive NPH3 family protein (AHRD V1 **-- D7MMF7_ARALY)%3B contains Interpro domain(s) IPR004249 NPH3
Solyc02g090540	2.13308	6.10761e-10	3.59473e-09	Short-chain dehydrogenase/reductase family protein (AHRD V1 **** D7LTG0_ARALY)%3B contains Interpro domain(s) IPR002347 Glucose/ribitol dehydrogenase
Solyc06g072120	2.13222	4.97782e-35	3.61075e-33	40S ribosomal protein SA (AHRD V1 ***- B4G194_MAIZE)%3B contains Interpro domain(s) IPR005707 Ribosomal protein S2%2C eukaryotic/archaeal
Solyc11g005970	2.13222	2.03978e-05	6.28218e-05	Pentatricopeptide repeat-containing protein (AHRD V1 ***- D7L4A8_ARALY)%3B contains Interpro domain(s) IPR002885 Pentatricopeptide repeat
Solyc01g090440	2.13114	4.33324e-09	2.28547e-08	Unknown Protein (AHRD V1)
Solyc09g091180	2.1307	2.25437e-29	9.82666e-28	chaperonin (AHRD V1 ***- Q6N0B9_9PROT)%3B contains Interpro domain(s) IPR001844 Chaperonin Cpn60
Solyc08g077140	2.13057	9.6424e-33	5.6395e-31	Pentatricopeptide repeat-containing protein (AHRD V1 ***- D7MRC5_ARALY)%3B contains Interpro domain(s) IPR002885 Pentatricopeptide repeat
Solyc12g021230	2.12956	6.89857e-37	6.02807e-35	DNA gyrase subunit B (AHRD V1 ***- Q8YLN3_ANASP)%3B contains Interpro domain(s) IPR011557 DNA gyrase%2C subunit B
Solyc03g046270	2.12745	4.11068e-05	0.000120555	Leaf senescence protein-like (AHRD V1 ***- Q8RV74_ORYSJ)%3B contains Interpro domain(s) IPR004253 Protein of unknown function DUF231%2C plant
Solyc11g012860	2.12744	9.20719e-24	2.39247e-22	Filament-like plant protein (Fragment) (AHRD V1 ***- FPP_SOLLC)%3B contains Interpro domain(s) IPR008587 Protein of unknown function DUF869%2C plant
Solyc08g083120	2.12639	8.41752e-36	6.61673e-34	Ubiquitin (AHRD V1 ***- C0SFI2_PARBP)%3B contains Interpro domain(s) IPR019956 Ubiquitin subgroup
Solyc07g041870	2.12621	3.1689e-21	6.26016e-20	Tubulin--tyrosine ligase-like protein 12 (AHRD V1 ***- B6U4S2_MAIZE)%3B contains Interpro domain(s) IPR004344 Tubulin-tyrosine ligase
Solyc09g082560	2.1262	1.57916e-12	1.27274e-11	Calmodulin binding protein (AHRD V1 **-* B6SW62_MAIZE)%3B contains Interpro domain(s) IPR000048 IQ calmodulin-binding region
Solyc10g047250	2.12289	2.75741e-17	3.75933e-16	Unknown Protein (AHRD V1)
Solyc03g111380	2.12211	2.38519e-17	3.27631e-16	Tubulin beta-1 chain (AHRD V1 ***- C1BSD0_9MAXI)%3B contains Interpro domain(s) IPR002454 Gamma tubulin
Solyc09g074090	2.12074	7.124e-17	9.33324e-16	Exosome complex exonuclease RRP4 (AHRD V1 ***- D0NCN9_PHYIN)
Solyc04g081350	2.12007	5.14036e-10	3.05125e-09	Transcription factor E2F (AHRD V1 **** B9GQW1_POPTR)%3B contains Interpro domain(s) IPR015633 E2F Family
Solyc06g074300	2.11944	1.80743e-31	9.40614e-30	Ribosomal protein (AHRD V1 ***- Q6ER67_ORYSJ)%3B contains Interpro domain(s) IPR002143 Ribosomal protein L1
Solyc01g006290	2.11758	8.0568e-15	8.53231e-14	Peroxidase (AHRD V1 **** Q42964_TOBAC)%3B contains Interpro domain(s) IPR002016 Haem peroxidase%2C plant/fungal/bacterial
Solyc11g065620	2.11688	6.86888e-27	2.43024e-25	Sulfite reductase (AHRD V1 **** O82802_TOBAC)%3B contains Interpro domain(s) IPR011787 Sulphite reductase%2C ferredoxin dependent
Solyc03g095780	2.11634	4.03567e-06	1.39269e-05	Abscisic acid receptor PYL6 (AHRD V1 **-* PYL6_ARATH)%3B contains Interpro domain(s) IPR019587 Polyketide cyclase/dehydrase
Solyc04g010240	2.11584	1.38464e-35	1.05745e-33	60S ribosomal protein L35 (AHRD V1 ***- D7M7V2_ARALY)%3B contains Interpro domain(s) IPR001854 Ribosomal protein L29
Solyc03g121640	2.11493	2.88172e-32	1.62092e-30	chaperonin (AHRD V1 ***- D3NRF5_AZOS1)%3B contains Interpro domain(s) IPR001844 Chaperonin Cpn60
Solyc07g063350	2.1145	3.33074e-12	2.5868e-11	COP1-Interacting ProteinI 7 (CIP7) (Fragment) (AHRD V1 *-*- Q7GDB1_ARATH)
Solyc07g032250	2.11445	1.85478e-14	1.88458e-13	Homology to unknown gene (AHRD V1 ***- Q01FF7_OSTTA)
Solyc07g064870	2.11389	2.75247e-08	1.31312e-07	Endoglucanase 1 (AHRD V1 ***- B6U0J0_MAIZE)%3B contains Interpro domain(s) IPR001701 Glycoside hydrolase%2C family 9
Solyc00g056680	2.11257	2.62219e-05	7.93159e-05	Lipase-like protein (AHRD V1 ***- Q949E1_ORYSA)%3B contains Interpro domain(s) IPR002921 Lipase%2C class 3
Solyc11g065760	2.1125	2.95676e-05	8.87075e-05	Thymidine kinase (AHRD V1 ***- Q71F77_SOLLC)%3B contains Interpro domain(s) IPR001267 Thymidine kinase
Solyc09g075170	2.11108	2.54056e-05	7.70328e-05	Pentatricopeptide repeat protein (AHRD V1 ***- D2STE4_GOSHI)%3B contains Interpro domain(s) IPR002885 Pentatricopeptide repeat
Solyc03g113880	2.11015	5.4184e-09	2.83001e-08	Endonuclease III (AHRD V1 *--- D3L1Y1_9BACT)%3B contains Interpro domain(s) IPR003265 HhH-GPD domain
Solyc01g109430	2.11012	0.000218139	0.000562783	PPPDE peptidase domain-containing protein 1 (AHRD V1 **-- PPDE1_XENLA)%3B contains Interpro domain(s) IPR008580 Protein of unknown function DUF862%2C eukaryotic
Solyc02g062630	2.10988	0.000375196	0.000925649	Pentatricopeptide repeat-containing protein (AHRD V1 ***- D7KYV5_ARALY)%3B contains Interpro domain(s) IPR002885 Pentatricopeptide repeat
Solyc12g099370	2.10927	1.57887e-16	1.99478e-15	GATA transcription factor 22 (AHRD V1 *-*- B6U513_MAIZE)%3B contains Interpro domain(s) IPR000679 Zinc finger%2C GATA-type
Solyc02g014310	2.10755	1.30729e-25	4.07297e-24	Polyadenylate-binding protein (AHRD V1 *--- PABP_DROME)%3B contains Interpro domain(s) IPR012677 Nucleotide-binding%2C alpha-beta plait
Solyc11g010200	2.10631	4.79371e-24	1.27023e-22	14-3-3 protein beta/alpha-1 (AHRD V1 **-- 143B1_ONCMY)%3B contains Interpro domain(s) IPR000308 14-3-3 protein
Solyc01g102790	2.10512	4.12421e-06	1.4196e-05	Pentatricopeptide repeat-containing protein (AHRD V1 ***- D7KHY5_ARALY)%3B contains Interpro domain(s) IPR002885 Pentatricopeptide repeat
Solyc06g064630	2.1045	8.79738e-26	2.81082e-24	Ribosomal protein L15 (AHRD V1 ***- B9GPA1_POPTR)%3B contains Interpro domain(s) IPR000439 Ribosomal protein L15e
Solyc09g084470	2.1037	0.00903204	0.0166244	Proteinase inhibitor I (AHRD V1 ***- Q43648_SOLTU)%3B contains Interpro domain(s) IPR000864 Proteinase inhibitor I13%2C potato inhibitor I
Solyc11g071460	2.10168	3.62717e-22	7.86878e-21	Dehydrogenase/reductase SDR family member 13 (AHRD V1 **-- DHR13_BOVIN)%3B contains Interpro domain(s) IPR002347 Glucose/ribitol dehydrogenase
Solyc03g117570	2.10159	4.3554e-07	1.75402e-06	Pentatricopeptide repeat-containing protein (AHRD V1 ***- D7M6Q4_ARALY)%3B contains Interpro domain(s) IPR002885 Pentatricopeptide repeat
Solyc06g071870	2.10157	2.745e-28	1.08341e-26	60S ribosomal protein L17 (AHRD V1 ***- D7KV33_ARALY)%3B contains Interpro domain(s) IPR005721 Ribosomal protein L22/L17%2C eukaryotic/archaeal
Solyc08g080730	2.10076	1.16034e-06	4.36773e-06	Senescence-associated protein (AHRD V1 ***- B3TLS7_ELAGV)%3B contains Interpro domain(s) IPR000301 Tetraspanin%2C subgroup
Solyc03g007840	2.10064	2.20205e-05	6.75204e-05	Pentatricopeptide repeat-containing protein (AHRD V1 ***- D7MBT1_ARALY)%3B contains Interpro domain(s) IPR002885 Pentatricopeptide repeat
Solyc10g049890	2.10041	1.57219e-09	8.81694e-09	Phosphoglycerate dehydrogenase (AHRD V1 **** D2D316_GOSHI)%3B contains Interpro domain(s) IPR015508 D-3-phosphogylcerate Dehydrogenase
Solyc11g007490	2.10037	0.00112488	0.00251227	UDP-glucosyltransferase (AHRD V1 **-* B3VI56_STERE)%3B contains Interpro domain(s) IPR002213 UDP-glucuronosyl/UDP-glucosyltransferase
Solyc01g090390	2.09772	1.51858e-08	7.49005e-08	Pentatricopeptide repeat-containing protein (AHRD V1 ***- D7LBT2_ARALY)%3B contains Interpro domain(s) IPR002885 Pentatricopeptide repeat
Solyc01g098150	2.09765	1.39271e-20	2.60347e-19	Pentatricopeptide repeat-containing protein (AHRD V1 ***- D7MHD4_ARALY)%3B contains Interpro domain(s) IPR002885 Pentatricopeptide repeat
Solyc11g073260	2.09742	1.0582e-11	7.73257e-11	Histone H2A (AHRD V1 ***- C6TMV8_SOYBN)%3B contains Interpro domain(s) IPR002119 Histone H2A
Solyc10g080350	2.09727	2.46581e-25	7.42392e-24	DNA-directed RNA polymerase (AHRD V1 ***- B9SL65_RICCO)%3B contains Interpro domain(s) IPR015699 DNA-directed RNA pol I%2C largest subunit
Solyc05g055640	2.09605	1.03343e-33	6.69151e-32	60S ribosomal protein L38 (AHRD V1 ***- D7LK18_ARALY)%3B contains Interpro domain(s) IPR002675 Ribosomal protein L38e
Solyc10g005280	2.09603	1.51402e-21	3.07501e-20	Pentatricopeptide repeat-containing protein (AHRD V1 ***- D7KVE2_ARALY)%3B contains Interpro domain(s) IPR002885 Pentatricopeptide repeat
Solyc08g077850	2.09318	3.15349e-26	1.05794e-24	tRNA/rRNA methyltransferase SpoU family protein (AHRD V1 *-*- Q54XF8_DICDI)%3B contains Interpro domain(s) IPR001537 tRNA/rRNA methyltransferase%2C SpoU
Solyc09g009380	2.09302	3.97334e-08	1.85413e-07	Protein kinase-like protein (AHRD V1 *-** Q9LZS4_ARATH)%3B contains Interpro domain(s) IPR002290 Serine/threonine protein kinase
Solyc01g109220	2.09258	1.39154e-28	5.6221e-27	Mitochondrial import receptor subunit TOM6 homolog (AHRD V1 ***- TOM6_ARATH)
Solyc12g098330	2.09249	4.09908e-35	2.99647e-33	60S ribosomal protein L13a-like protein (AHRD V1 ***- Q3HRW1_SOLTU)%3B contains Interpro domain(s) IPR005755 Ribosomal protein L13%2C eukaryotic/archaeal
Solyc03g113680	2.09236	8.92946e-11	5.84115e-10	Microtubule-associated protein TORTIFOLIA1 (AHRD V1 **-- B6SS76_MAIZE)%3B contains Interpro domain(s) IPR011989 Armadillo-like helical
Solyc10g009410	2.09045	8.78284e-13	7.32046e-12	Aspartic proteinase nepenthesin I (AHRD V1 **-- A9ZMF9_NEPAL)%3B contains Interpro domain(s) IPR001461 Peptidase A1
Solyc10g083310	2.09017	2.47958e-05	7.53905e-05	Kinesin-5 (AHRD V1 *-*- D2V727_NAEGR)%3B contains Interpro domain(s) IPR001752 Kinesin%2C motor region
Solyc02g020990	2.09002	3.5068e-06	1.22344e-05	Unknown Protein (AHRD V1)
Solyc07g054460	2.08848	3.87712e-19	6.37823e-18	H/ACA ribonucleoprotein complex non-core subunit NAF1 (AHRD V1 *-*- NAF1_HUMAN)%3B contains Interpro domain(s) IPR008696 NAF1
Solyc11g008440	2.08838	2.72363e-06	9.67642e-06	Amino acid transporter (AHRD V1 **** B9HLH9_POPTR)%3B contains Interpro domain(s) IPR013057 Amino acid transporter%2C transmembrane
Solyc08g005640	2.08833	2.20194e-07	9.25248e-07	Ent-kaurene synthase-like protein 1 (AHRD V1 **** Q673F9_HORVD)%3B contains Interpro domain(s) IPR005630 Terpene synthase%2C metal-binding domain
Solyc06g073980	2.08829	4.84577e-09	2.54081e-08	Unknown Protein (AHRD V1)%3B contains Interpro domain(s) IPR003340 Transcriptional factor B3
Solyc11g013270	2.08704	1.33463e-07	5.77737e-07
Solyc07g042380	2.08703	8.43212e-34	5.53896e-32	Ribosomal RNA processing protein (AHRD V1 *--- A6ZWN4_YEAS7)%3B contains Interpro domain(s) IPR012978 Region of unknown function%2C NUC173
Solyc07g063510	2.08666	1.76348e-29	7.7589e-28	Aluminum resistance protein-like (AHRD V1 **** Q54763_SYNE7)%3B contains Interpro domain(s) IPR009651 Aluminium resistance
Solyc08g007660	2.08543	0.000166396	0.000438564	Subtilisin-like serine protease (AHRD V1 **-- C3VDI0_CARPA)%3B contains Interpro domain(s) IPR015500 Peptidase S8%2C subtilisin-related
Solyc02g067340	2.08506	1.68258e-25	5.19059e-24	MYB transcription factor (AHRD V1 **-* Q9SN78_ARATH)%3B contains Interpro domain(s) IPR015495 Myb transcription factor
Solyc08g075350	2.08445	0.00052198	0.00125178	Pentatricopeptide repeat-containing protein (AHRD V1 ***- D7MGT8_ARALY)%3B contains Interpro domain(s) IPR002885 Pentatricopeptide repeat
Solyc10g083940	2.08336	1.37382e-07	5.93686e-07	Nodulin family protein (AHRD V1 ***- D7MWD3_ARALY)%3B contains Interpro domain(s) IPR010658 Nodulin-like
Solyc05g041470	2.07951	0.000416967	0.00101946	Transient receptor potential cation channel subfamily A member 1 homolog (AHRD V1 *--- TRPA1_CAEEL)%3B contains Interpro domain(s) IPR002110 Ankyrin
Solyc01g096010	2.07898	8.11758e-33	4.85394e-31	Unknown Protein (AHRD V1)
Solyc10g074820	2.0778	3.43881e-14	3.37892e-13	Unknown Protein (AHRD V1)%3B contains Interpro domain(s) IPR010605 Protein of unknown function DUF1191
Solyc04g064650	2.077	3.90844e-05	0.000115109	Pentatricopeptide repeat-containing protein (AHRD V1 ***- D7KHY5_ARALY)%3B contains Interpro domain(s) IPR002885 Pentatricopeptide repeat
Solyc08g068480	2.07544	6.26164e-05	0.000177942	Indole-3-acetic acid-amido synthetase GH3.8 (AHRD V1 -**- B6U4E2_MAIZE)%3B contains Interpro domain(s) IPR004993 GH3 auxin-responsive promoter
Solyc10g005690	2.07491	2.64021e-13	2.33749e-12	Chloride channel E (AHRD V1 ***- D3YP04_THEHA)%3B contains Interpro domain(s) IPR001807 Chloride channel%2C voltage gated
Solyc10g080590	2.07254	4.03654e-34	2.73771e-32	60S ribosomal protein L21-like protein (AHRD V1 ***- Q3HVK5_SOLTU)%3B contains Interpro domain(s) IPR001147 Ribosomal protein L21e
Solyc06g082760	2.07225	1.08488e-14	1.12792e-13	50S ribosomal protein L17 (AHRD V1 ***- B4FZB4_MAIZE)%3B contains Interpro domain(s) IPR000456 Ribosomal protein L17
Solyc07g053380	2.0694	9.1812e-05	0.000253248	Pentatricopeptide repeat-containing protein (AHRD V1 ***- D7LW55_ARALY)%3B contains Interpro domain(s) IPR002885 Pentatricopeptide repeat
Solyc06g064460	2.06871	5.861e-31	2.90529e-29	Ribosomal protein L7a (AHRD V1 ***- A8J567_CHLRE)%3B contains Interpro domain(s) IPR001921 Ribosomal protein L7A
Solyc01g096580	2.06645	1.86683e-30	8.79003e-29	30S ribosomal protein S10 (AHRD V1 ***- RS10_CAMFF)%3B contains Interpro domain(s) IPR005729 Ribosomal protein S10%2C eukaryotic/archaeal
Solyc06g076630	2.06588	2.46768e-10	1.53004e-09	Peroxidase (AHRD V1 **** C0KKH9_9CARY)%3B contains Interpro domain(s) IPR002016 Haem peroxidase%2C plant/fungal/bacterial
Solyc05g005800	2.06509	7.48193e-26	2.41103e-24	Threonyl-tRNA synthetase (AHRD V1 ***- Q17LW8_AEDAE)%3B contains Interpro domain(s) IPR002320 Threonyl-tRNA synthetase%2C class IIa
Solyc02g093420	2.06413	1.72548e-06	6.31043e-06	NAC domain class transcription factor (AHRD V1 *-** D9ZJ99_MALDO)%3B contains Interpro domain(s) IPR003441 No apical meristem (NAM) protein
Solyc08g067050	2.06377	3.63135e-19	6.00019e-18	Arginine N-methyltransferase family protein (AHRD V1 ***- D7KE86_ARALY)%3B contains Interpro domain(s) IPR010456 Ribosomal L11 methyltransferase
Solyc06g007670	2.06323	2.47972e-28	9.82837e-27	60S ribosomal protein L5-1 (AHRD V1 ***- B6THG9_MAIZE)%3B contains Interpro domain(s) IPR005485 Ribosomal protein L5%2C eukaryotic
Solyc06g009970	2.0624	1.45585e-23	3.67622e-22	Elongation factor 1-alpha (AHRD V1 ***- Q8H9C0_SOLTU)%3B contains Interpro domain(s) IPR004539 Translation elongation factor EF1A%2C eukaryotic and archaeal IPR000795 Protein synthesis factor%2C GTP-binding
Solyc07g049680	2.06029	1.72722e-06	6.31556e-06	Condensin complex subunit 2 (AHRD V1 ***- Q564K3_ARATH)%3B contains Interpro domain(s) IPR008418 Barren
Solyc06g005110	2.0602	2.62966e-26	8.90152e-25	Ribosomal protein S23 (AHRD V1 ***- A8IJQ4_CHLRE)%3B contains Interpro domain(s) IPR006032 Ribosomal protein S12/S23
Solyc04g063230	2.05906	1.54178e-18	2.38007e-17	Dehydration-responsive family protein (AHRD V1 **-- D7LF23_ARALY)%3B contains Interpro domain(s) IPR004159 Protein of unknown function DUF248%2C methyltransferase putative
Solyc00g206460	2.0588	5.94975e-10	3.50401e-09	Os06g0220000 protein (Fragment) (AHRD V1 **-- Q0DDJ2_ORYSJ)%3B contains Interpro domain(s) IPR006766 Phosphate-induced protein 1 conserved region
Solyc01g099120	2.05827	2.5707e-05	7.78463e-05	Protein AUXIN RESPONSE 4 (AHRD V1 ***- AXR4_ARATH)
Solyc03g098740	2.05714	4.709e-06	1.60588e-05	Kunitz trypsin inhibitor (AHRD V1 **** B8Y888_TOBAC)%3B contains Interpro domain(s) IPR011065 Kunitz inhibitor ST1-like
Solyc10g084860	2.0568	2.27829e-08	1.09862e-07	Receptor like protein kinase (AHRD V1 **** Q39139_ARATH)%3B contains Interpro domain(s) IPR001220 Legume lectin%2C beta chain
Solyc05g005700	2.0542	8.31547e-14	7.85007e-13	Aldehyde dehydrogenase 1 (AHRD V1 **** Q84V96_LOTCO)%3B contains Interpro domain(s) IPR015590 Aldehyde dehydrogenase
Solyc05g056090	2.05377	1.2177e-15	1.40521e-14	Unknown Protein (AHRD V1)%3B contains Interpro domain(s) IPR009724 Protein of unknown function DUF1301
Solyc01g099670	2.05249	1.6722e-31	8.76067e-30	40S ribosomal protein S10-like (AHRD V1 ***- Q2XTB2_SOLTU)%3B contains Interpro domain(s) IPR005326 Plectin/S10%2C N-terminal
Solyc02g090240	2.05098	1.27738e-07	5.54227e-07	Pentatricopeptide repeat-containing protein (AHRD V1 ***- D7LT58_ARALY)%3B contains Interpro domain(s) IPR002885 Pentatricopeptide repeat
Solyc05g012190	2.05078	1.55689e-17	2.17144e-16	AAA family ATPase CDC48 subfamily (AHRD V1 **-- A8AAC3_IGNH4)%3B contains Interpro domain(s) IPR003959 ATPase%2C AAA-type%2C core
Solyc07g048010	2.05006	1.26315e-12	1.03177e-11	Thymidylate kinase family protein (AHRD V1 **** D7MSE9_ARALY)%3B contains Interpro domain(s) IPR000062 Thymidylate kinase-like
Solyc09g059990	2.04995	7.84908e-05	0.00021924	Zinc finger family protein (AHRD V1 ***- D7MVE2_ARALY)%3B contains Interpro domain(s) IPR018957 Zinc finger%2C C3HC4 RING-type
Solyc07g040710	2.04909	0.000591684	0.00140158	Calmodulin-binding protein (AHRD V1 **** A2I5F3_BETVU)
Solyc05g007910	2.04886	4.82631e-19	7.864e-18	50S ribosomal protein L18 (AHRD V1 ***- B6WB57_9FIRM)%3B contains Interpro domain(s) IPR005484 Ribosomal protein L18/L5
Solyc07g048090	2.04864	1.69077e-13	1.536e-12	Fasciclin-like arabinogalactan protein 2 (AHRD V1 ***- A9XTK7_GOSHI)%3B contains Interpro domain(s) IPR000782 FAS1 domain
Solyc02g068080	2.04722	3.34071e-20	6.01744e-19	Voltage-gated chloride channel (AHRD V1 **** Q96325_ARATH)%3B contains Interpro domain(s) IPR002251 Chloride channel plant CLC
Solyc01g079740	2.04708	3.95837e-10	2.38658e-09	Unknown Protein (AHRD V1)
Solyc01g009100	2.04676	5.1114e-32	2.79151e-30	Ribosomal protein L30 (AHRD V1 ***- B3TLP4_ELAGV)%3B contains Interpro domain(s) IPR000231 Ribosomal protein L30e
Solyc02g077730	2.04667	2.76125e-10	1.70248e-09	Unknown Protein (AHRD V1)
Solyc08g014340	2.04351	3.5451e-26	1.17879e-24	Cysteine synthase (AHRD V1 **** Q9FS26_SOLTU)%3B contains Interpro domain(s) IPR005859 Cysteine synthase A
Solyc10g084630	2.04313	1.0487e-20	1.98607e-19	RNA binding protein (AHRD V1 ***- B6TNV4_MAIZE)%3B contains Interpro domain(s) IPR012677 Nucleotide-binding%2C alpha-beta plait
Solyc09g018500	2.04176	0.00073947	0.00171851	DNA binding protein (AHRD V1 ***- B4FLH1_MAIZE)
Solyc08g078570	2.04164	0.000316747	0.000791636	Pentatricopeptide repeat-containing protein (AHRD V1 ***- D7MP46_ARALY)%3B contains Interpro domain(s) IPR002885 Pentatricopeptide repeat
Solyc04g039940	2.04151	7.89717e-09	4.03822e-08	Pentatricopeptide repeat-containing protein (AHRD V1 ***- D7LHR6_ARALY)%3B contains Interpro domain(s) IPR002885 Pentatricopeptide repeat
Solyc11g018560	2.04143	5.01981e-19	8.16513e-18	50S ribosomal protein L25 (AHRD V1 ***- D2LIE4_RHOVA)%3B contains Interpro domain(s) IPR011035 Ribosomal protein L25/Gln-tRNA synthetase%2C anti-codon-binding domain
Solyc12g010050	2.04101	9.48966e-09	4.80286e-08	DNA-3-methyladenine glycosylase I (AHRD V1 ***- B6U9I4_MAIZE)%3B contains Interpro domain(s) IPR005019 Methyladenine glycosylase
Solyc01g098700	2.04064	5.43511e-25	1.57091e-23	Branched-chain amino acid aminotransferase-like protein (AHRD V1 ***- Q84L60_CICAR)%3B contains Interpro domain(s) IPR001544 Aminotransferase%2C class IV
Solyc09g075790	2.04063	2.09617e-07	8.83966e-07	Long-chain fatty acid CoA ligase (AHRD V1 **** Q9GLP3_CALJA)%3B contains Interpro domain(s) IPR000873 AMP-dependent synthetase and ligase
Solyc02g093380	2.04045	9.97793e-05	0.000273498	Pentatricopeptide repeat-containing protein (AHRD V1 ***- D7MJP3_ARALY)%3B contains Interpro domain(s) IPR002885 Pentatricopeptide repeat
Solyc04g079340	2.03948	2.54549e-23	6.22683e-22
Solyc05g009330	2.03906	1.32586e-20	2.48344e-19	COSII_At1g13380 (Fragment) (AHRD V1 *-*- C0KEX8_SOLPN)%3B contains Interpro domain(s) IPR009606 Protein of unknown function DUF1218
Solyc10g055230	2.03805	1.75162e-05	5.44919e-05	Disease resistance response protein (AHRD V1 ***- A8IXC7_BRACM)%3B contains Interpro domain(s) IPR004265 Plant disease resistance response protein
Solyc02g084210	2.03702	5.98892e-05	0.00017076	GDP-mannose 4 6-dehydratase (AHRD V1 **** B7XH28_NICBE)%3B contains Interpro domain(s) IPR006368 GDP-mannose 4%2C6-dehydratase
Solyc04g007140	2.03699	0.00686653	0.0129775	Unknown Protein (AHRD V1)
Solyc08g066360	2.03654	5.12384e-26	1.67412e-24	Malic enzyme (AHRD V1 ***- B9RKI6_RICCO)%3B contains Interpro domain(s) IPR012302 Malic enzyme%2C NAD-binding
Solyc09g072860	2.03612	2.15418e-07	9.07287e-07	Genomic DNA chromosome 5 P1 clone MRH10 (AHRD V1 ***- Q9FNC5_ARATH)
Solyc07g055310	2.03601	2.04966e-09	1.13056e-08	Pentatricopeptide repeat-containing protein (AHRD V1 ***- D7LGJ0_ARALY)%3B contains Interpro domain(s) IPR002885 Pentatricopeptide repeat
Solyc05g054740	2.03513	1.42595e-28	5.74877e-27	High affinity sulfate transporter 2 (AHRD V1 **** SUT2_STYHA)%3B contains Interpro domain(s) IPR001902 Sulphate anion transporter
Solyc04g081260	2.03386	1.03844e-20	1.96864e-19	Filament-like plant protein (Fragment) (AHRD V1 *-*- FPP_SOLLC)%3B contains Interpro domain(s) IPR008587 Protein of unknown function DUF869%2C plant
Solyc04g007180	2.0333	8.29028e-08	3.69775e-07	Ethylene responsive transcription factor 2a (AHRD V1 *-*- C0J9I7_9ROSA)%3B contains Interpro domain(s) IPR001471 Pathogenesis-related transcriptional factor and ERF%2C DNA-binding
Solyc03g082570	2.03311	1.66106e-28	6.6823e-27	Ubiquitin (AHRD V1 ***- C0SFI2_PARBP)%3B contains Interpro domain(s) IPR019956 Ubiquitin subgroup
Solyc02g077630	2.03294	1.69534e-13	1.5394e-12	Receptor like kinase%2C RLK
Solyc05g054040	2.02952	2.11742e-05	6.51248e-05	Transmembrane 9 superfamily protein member 1 (AHRD V1 **** B6TZ24_MAIZE)%3B contains Interpro domain(s) IPR004240 Nonaspanin (TM9SF)
Solyc11g044360	2.02919	9.06302e-14	8.50059e-13	At4g38160-like protein (Fragment) (AHRD V1 *--- C0JEI1_9BRAS)%3B contains Interpro domain(s) IPR003690 Mitochodrial transcription termination factor-related
Solyc01g009990	2.02848	1.67874e-31	8.76067e-30	Peptidyl-prolyl cis-trans isomerase (AHRD V1 ***- B9RMA5_RICCO)%3B contains Interpro domain(s) IPR002130 Peptidyl-prolyl cis-trans isomerase%2C cyclophilin-type
Solyc08g081530	2.02786	1.92948e-31	9.986e-30	Reductase (AHRD V1 ***- B5HVX9_9ACTO)%3B contains Interpro domain(s) IPR013027 FAD-dependent pyridine nucleotide-disulphide oxidoreductase
Solyc07g005090	2.02734	4.32684e-16	5.22083e-15	Chitinase A (AHRD V1 ***- Q4W6L6_CYCRE)%3B contains Interpro domain(s) IPR011583 Chitinase II
Solyc09g007350	2.02712	1.58097e-27	5.89317e-26	30S ribosomal protein S12 (AHRD V1 ***- RS12_MYCPU)%3B contains Interpro domain(s) IPR005680 Ribosomal protein S23%2C eukaryotic/archaeal
Solyc03g118120	2.02645	1.85585e-18	2.85084e-17	Transferase transferring glycosyl groups (AHRD V1 **-* D7MH74_ARALY)
Solyc01g103750	2.02613	2.66132e-24	7.20436e-23	ATP phosphoribosyltransferase (AHRD V1 **** O46887_THLGO)%3B contains Interpro domain(s) IPR001348 Histidine biosynthesis HisG: ATP phosphoribosyltransferase
Solyc01g107330	2.02409	3.66156e-25	1.07652e-23	SWIB/MDM2 domain protein (AHRD V1 ***- D6VG39_9BURK)%3B contains Interpro domain(s) IPR019835 SWIB domain
Solyc02g089440	2.02381	2.1303e-21	4.26673e-20	Glycosyltransferase (AHRD V1 **-- B9NC17_POPTR)%3B contains Interpro domain(s) IPR002495 Glycosyl transferase%2C family 8
Solyc07g053350	2.0232	1.24762e-15	1.43797e-14
Solyc06g069010	2.02044	5.42779e-33	3.34119e-31	Guanine nucleotide-binding protein beta subunit-like protein (AHRD V1 **-* B6SJ21_MAIZE)%3B contains Interpro domain(s) IPR020472 G-protein beta WD-40 repeat%2C region
Solyc10g007280	2.02026	5.79916e-13	4.92536e-12	AAA-ATPase (AHRD V1 **-* C3TX92_BRASY)%3B contains Interpro domain(s) IPR003959 ATPase%2C AAA-type%2C core
Solyc05g009530	2.02019	2.16854e-31	1.11606e-29	Dihydrolipoyllysine-residue acetyltransferase component of pyruvate dehydrogenase complex (AHRD V1 **** A5GUY8_SYNR3)%3B contains Interpro domain(s) IPR001078 2-oxoacid dehydrogenase acyltransferase%2C catalytic domain
Solyc10g083110	2.01979	2.56291e-23	6.25317e-22	Dihydrodipicolinate synthase 2 (AHRD V1 **** D7LCJ3_ARALY)%3B contains Interpro domain(s) IPR005263 Dihydrodipicolinate synthase subfamily
Solyc06g073680	2.01976	9.17161e-18	1.31633e-16	Notchless protein homolog 1 (AHRD V1 *--- NLE1_PONAB)%3B contains Interpro domain(s) IPR017986 WD40 repeat%2C region
Solyc02g062650	2.01974	7.39198e-05	0.000207263	Laccase (AHRD V1 ***- Q9AUI0_PINTA)%3B contains Interpro domain(s) IPR017761 Laccase
Solyc03g093490	2.01873	0.0015169	0.00331257	WD-repeat protein (AHRD V1 ***- Q6V5I1_SISIR)%3B contains Interpro domain(s) IPR011044 Quinoprotein amine dehydrogenase%2C beta chain-like
Solyc09g097840	2.01811	2.83268e-07	1.17245e-06	Pentatricopeptide repeat-containing protein (AHRD V1 ***- D7LXU6_ARALY)%3B contains Interpro domain(s) IPR002885 Pentatricopeptide repeat
Solyc03g121190	2.01762	0.013218	0.0234573	Unknown Protein (AHRD V1)
Solyc04g077020	2.01708	1.62073e-20	2.99986e-19	Tubulin alpha-3 chain (AHRD V1 ***- B6SPX4_MAIZE)%3B contains Interpro domain(s) IPR002452 Alpha tubulin
Solyc07g008760	2.01428	3.49024e-27	1.25375e-25	Tetratricopeptide repeat (TPR)-containing protein-like protein (AHRD V1 ***- Q84NS6_ORYSJ)%3B contains Interpro domain(s) IPR011990 Tetratricopeptide-like helical
Solyc02g092950	2.01311	6.75571e-08	3.05095e-07	Microtubule plus-end binding protein (AHRD V1 **** B2LU37_BRANA)%3B contains Interpro domain(s) IPR001715 Calponin-like actin-binding
Solyc11g006650	2.01274	3.93187e-06	1.36012e-05	Heat shock protein 101 (AHRD V1 *-*- Q3L1D0_VITVI)%3B contains Interpro domain(s) IPR004176 Clp%2C N-terminal
Solyc08g074240	2.01258	1.48721e-31	7.84839e-30	40S ribosomal protein S6 (AHRD V1 ***- B6T1H0_MAIZE)%3B contains Interpro domain(s) IPR014401 Ribosomal protein S6%2C eukaryotic
Solyc09g097980	2.0122	3.04977e-06	1.07536e-05	Aldo/keto reductase family protein (AHRD V1 ***- D7KWQ9_ARALY)%3B contains Interpro domain(s) IPR001395 Aldo/keto reductase
Solyc04g074300	2.01088	1.75293e-24	4.85011e-23	30S ribosomal protein S5 (AHRD V1 ***- C5K1T7_AJEDS)%3B contains Interpro domain(s) IPR005711 Ribosomal protein S5%2C eukaryotic/archaeal
Solyc07g009330	2.0101	1.34467e-22	3.0621e-21	60S acidic ribosomal protein P3 (AHRD V1 ***- B4G1B3_MAIZE)%3B contains Interpro domain(s) IPR001813 Ribosomal protein 60S
Solyc03g120170	2.00987	1.27291e-05	4.04092e-05	Unknown Protein (AHRD V1)
Solyc11g020870	2.00937	3.79993e-20	6.81196e-19	MYG1 protein (AHRD V1 **-- Q58D33_BOVIN)%3B contains Interpro domain(s) IPR003226 Metal-dependent protein hydrolase
Solyc09g090030	2.00835	9.36044e-23	2.15508e-21	SET and zf-MYND domain-containing protein (AHRD V1 *-*- D8U5L8_VOLCA)%3B contains Interpro domain(s) IPR001214 SET
Solyc11g006380	2.00749	1.63055e-20	3.01508e-19	Pentatricopeptide repeat-containing protein (AHRD V1 ***- D7KWQ2_ARALY)%3B contains Interpro domain(s) IPR002885 Pentatricopeptide repeat
Solyc01g095480	2.00715	3.31833e-23	7.98225e-22	Ribonuclease PH (AHRD V1 ***- RNPH_STRGG)%3B contains Interpro domain(s) IPR001247 Exoribonuclease%2C phosphorolytic domain 1
Solyc04g081220	2.00685	2.38622e-17	3.27631e-16	Genomic DNA chromosome 5 P1 clone MIJ24 (AHRD V1 ***- Q9FKA2_ARATH)%3B contains Interpro domain(s) IPR019716 Ribosomal protein L53%2C mitochondrial
Solyc06g067910	2.00655	0.000719057	0.00167438
Solyc05g053670	2.00627	5.43952e-32	2.96209e-30	60S ribosomal protein L13a-like protein (AHRD V1 ***- Q3HRW1_SOLTU)%3B contains Interpro domain(s) IPR005755 Ribosomal protein L13%2C eukaryotic/archaeal
Solyc06g083650	2.00624	1.42695e-18	2.21737e-17	GDSL esterase/lipase At5g33370 (AHRD V1 ***- GDL79_ARATH)%3B contains Interpro domain(s) IPR001087 Lipase%2C GDSL
Solyc04g014720	2.00583	7.6861e-29	3.18761e-27	60S ribosomal protein L6 (AHRD V1 ***- B9RHH3_RICCO)%3B contains Interpro domain(s) IPR000915 Ribosomal protein L6E
Solyc06g048920	2.00575	8.25146e-21	1.58345e-19	Glycerol-3-phosphate dehydrogenase (AHRD V1 **** A8IKS4_CHLRE)%3B contains Interpro domain(s) IPR006168 NAD-dependent glycerol-3-phosphate dehydrogenase
Solyc06g068710	2.00564	2.02785e-24	5.54545e-23	Ribosomal protein S27 (AHRD V1 ***- C6SWV6_SOYBN)%3B contains Interpro domain(s) IPR000592 Ribosomal protein S27e
Solyc06g066670	2.00421	5.24974e-10	3.11126e-09	ATP-dependent DNA helicase Ta0057 (AHRD V1 *-** XPD_THEAC)%3B contains Interpro domain(s) IPR013020 DNA helicase (DNA repair)%2C Rad3 type
Solyc01g088390	2.00363	1.67063e-11	1.19429e-10	Sister chromatid cohesion protein DCC1 (AHRD V1 ***- B5XCA8_SALSA)%3B contains Interpro domain(s) IPR019128 Sister chromatid cohesion protein DCC1
Solyc10g006580	2.00304	2.61268e-29	1.12579e-27	50S ribosomal protein L2 (AHRD V1 ***- RL2_EDWI9)%3B contains Interpro domain(s) IPR002171 Ribosomal protein L2
Solyc09g065330	2.00283	4.81473e-31	2.41211e-29	40S ribosomal protein S24 (AHRD V1 ***- C6TAW2_SOYBN)%3B contains Interpro domain(s) IPR001976 Ribosomal protein S24e
Solyc02g070330	2.00255	9.21498e-32	4.94634e-30	40S ribosomal protein S4-like protein (AHRD V1 ***- Q2XPX5_SOLTU)%3B contains Interpro domain(s) IPR000876 Ribosomal protein S4e
Solyc12g096700	1.9999	8.33355e-31	4.04554e-29	Ribosomal L9-like protein (AHRD V1 ***- B3TLR1_ELAGV)%3B contains Interpro domain(s) IPR002359 Ribosomal protein L6%2C conserved site-2
Solyc01g098630	1.99903	7.06333e-14	6.71552e-13	Import inner membrane translocase subunit Tim44 (AHRD V1 *--- B3Q8B6_RHOPT)%3B contains Interpro domain(s) IPR007379 Mitochondrial inner membrane translocase complex%2C subunit Tim44-related
Solyc05g007560	1.99872	3.66905e-30	1.69362e-28	60S ribosomal protein L34 (AHRD V1 ***- B6UH15_MAIZE)%3B contains Interpro domain(s) IPR008195 Ribosomal protein L34e
Solyc10g054730	1.99828	0.000270346	0.00068487	Pentatricopeptide repeat-containing protein (AHRD V1 ***- D7L3A6_ARALY)%3B contains Interpro domain(s) IPR002885 Pentatricopeptide repeat
Solyc04g072510	1.99809	1.28223e-23	3.2553e-22	Mitochondrial transcription termination factor-like (AHRD V1 ***- Q67UH5_ORYSJ)%3B contains Interpro domain(s) IPR003690 Mitochodrial transcription termination factor-related
Solyc06g064470	1.99767	2.24107e-28	8.95809e-27	Ribosomal protein L7a (AHRD V1 ***- A8J567_CHLRE)%3B contains Interpro domain(s) IPR001921 Ribosomal protein L7A
Solyc07g052430	1.99745	3.8113e-18	5.68728e-17	Transmembrane protein 97 (AHRD V1 *-*- TMM97_HUMAN)%3B contains Interpro domain(s) IPR016964 Transmembrane protein 97%2C predicted
Solyc01g010060	1.99679	1.23574e-10	7.96972e-10	Unknown Protein (AHRD V1)
Solyc01g065580	1.99609	5.14367e-22	1.09936e-20	Pumilio domain-containing protein KIAA0020 (AHRD V1 ***- B5X3V8_SALSA)%3B contains Interpro domain(s) IPR011989 Armadillo-like helical
Solyc02g023950	1.99588	8.55593e-11	5.61244e-10	Receptor like kinase%2C RLK
Solyc08g061910	1.99565	5.51226e-06	1.86023e-05	Unknown Protein (AHRD V1)
Solyc08g016500	1.9956	4.82564e-07	1.93098e-06	Potassium channel (AHRD V1 ***- Q9LEG6_SOLLC)%3B contains Interpro domain(s) IPR000595 Cyclic nucleotide-binding
Solyc11g056680	1.99491	2.84626e-07	1.17729e-06	LRR receptor-like serine/threonine-protein kinase%2C RLP
Solyc07g056550	1.99466	4.3632e-25	1.27285e-23	Bystin (AHRD V1 ***- B5DGE9_SALSA)%3B contains Interpro domain(s) IPR007955 Bystin
Solyc12g099620	1.99397	0.000143885	0.00038381	Pentatricopeptide repeat-containing protein (AHRD V1 ***- D7LJ24_ARALY)%3B contains Interpro domain(s) IPR002885 Pentatricopeptide repeat
Solyc04g081150	1.99185	3.1779e-28	1.25164e-26	Histone H3 (AHRD V1 ***- A8MRL0_ARATH)%3B contains Interpro domain(s) IPR000164 Histone H3
Solyc01g100340	1.99135	7.95366e-05	0.000221864	Pentatricopeptide repeat-containing protein (AHRD V1 ***- D7KIZ3_ARALY)%3B contains Interpro domain(s) IPR002885 Pentatricopeptide repeat
Solyc05g053880	1.99025	3.72179e-19	6.13345e-18	cDNA FLJ42396 fis clone ASTRO2001107 (AHRD V1 *-*- B3KW72_HUMAN)
Solyc10g045290	1.98937	0.000454215	0.00110335	Kinase interacting family protein (AHRD V1 **-- D7KCB2_ARALY)%3B contains Interpro domain(s) IPR011684 KIP1-like
Solyc02g036460	1.98886	2.55766e-09	1.38955e-08	Unknown Protein (AHRD V1)
Solyc09g061430	1.98867	3.0094e-25	8.98849e-24	Nucleolar GTP-binding protein 2 (AHRD V1 *-** B0WF29_CULQU)%3B contains Interpro domain(s) IPR014813 GNL3L/Grn1 putative GTPase
Solyc06g016790	1.98812	2.7237e-08	1.30071e-07	Unknown Protein (AHRD V1)
Solyc01g096220	1.98616	2.51432e-10	1.55742e-09	Ras-related protein Rab-25 (AHRD V1 ***- RAB25_BOVIN)%3B contains Interpro domain(s) IPR015595 Rab11-related
Solyc01g086660	1.98616	2.92387e-08	1.3889e-07	Unknown Protein (AHRD V1)
Solyc09g073000	1.98524	1.97973e-26	6.71356e-25	Elongation factor Tu (AHRD V1 **** B9SFP0_RICCO)%3B contains Interpro domain(s) IPR004541 Translation elongation factor EFTu/EF1A%2C bacterial and organelle
Solyc01g093990	1.9851	7.76077e-17	1.01251e-15	Glyoxylate reductase/hydroxypyruvate reductase (AHRD V1 ***- GRHPR_HUMAN)%3B contains Interpro domain(s) IPR006140 D-isomer specific 2-hydroxyacid dehydrogenase%2C NAD-binding
Solyc00g047700	1.98464	1.02934e-31	5.49381e-30	Unknown Protein (AHRD V1)
Solyc08g062490	1.98454	3.52799e-15	3.87378e-14	WRKY transcription factor 16 (AHRD V1 **** C9DI05_9ROSI)%3B contains Interpro domain(s) IPR003657 DNA-binding WRKY
Solyc03g007350	1.98315	9.92114e-06	3.20972e-05	Pentatricopeptide repeat-containing protein (AHRD V1 ***- D7L041_ARALY)%3B contains Interpro domain(s) IPR002885 Pentatricopeptide repeat
Solyc11g012110	1.98286	2.37946e-28	9.47095e-27	60S ribosomal protein L6 (AHRD V1 ***- B9RHH3_RICCO)%3B contains Interpro domain(s) IPR000915 Ribosomal protein L6E
Solyc05g007100	1.9828	2.65809e-27	9.65909e-26	DNA-binding protein p24 (AHRD V1 **-* Q9LL85_SOLTU)%3B contains Interpro domain(s) IPR013742 Plant transcription factor
Solyc09g025260	1.98236	3.96108e-22	8.56349e-21	SAP-like protein BP-73 (AHRD V1 ***- B6SRI7_MAIZE)%3B contains Interpro domain(s) IPR001757 ATPase%2C P-type%2C K/Mg/Cd/Cu/Zn/Na/Ca/Na/H-transporter
Solyc08g082890	1.98234	1.79794e-05	5.57758e-05	MYB transcription factor (AHRD V1 **-- D0VYJ9_DIOKA)%3B contains Interpro domain(s) IPR015495 Myb transcription factor
Solyc03g120380	1.98115	0.00199046	0.00422971	Auxin response factor 9 (AHRD V1 *-** ARFI_ARATH)%3B contains Interpro domain(s) IPR003311 AUX/IAA protein
Solyc02g092790	1.98101	2.02492e-08	9.81227e-08	Arabinogalactan (AHRD V1 *-*- Q43719_SOLLC)
Solyc07g006570	1.98063	3.67526e-09	1.95878e-08	S8-RNase (Fragment) (AHRD V1 **-- Q5XPJ2_MALDO)%3B contains Interpro domain(s) IPR001568 Ribonuclease T2
Solyc02g084730	1.97929	0.000811982	0.00186876	Ribosomal RNA small subunit methyltransferase A (AHRD V1 *-*- C2HM18_LACAC)%3B contains Interpro domain(s) IPR011530 rRNA adenine dimethylase
Solyc01g100310	1.97834	4.91194e-08	2.26234e-07	Calmodulin-binding protein (AHRD V1 *-*- D7L4F9_ARALY)%3B contains Interpro domain(s) IPR012442 Protein of unknown function DUF1645
Solyc09g008300	1.97737	0.000748133	0.00173628	Pentatricopeptide repeat-containing protein (AHRD V1 ***- D7LE02_ARALY)%3B contains Interpro domain(s) IPR002885 Pentatricopeptide repeat
Solyc08g080780	1.97727	5.0023e-16	5.99733e-15	SKIP interacting protein 24 (Fragment) (AHRD V1 *--- B8Q8B0_ORYSI)
Solyc07g063890	1.97707	8.84443e-29	3.62314e-27	50S ribosomal protein L2 (AHRD V1 ***- RL2_EDWI9)%3B contains Interpro domain(s) IPR002171 Ribosomal protein L2
Solyc09g008630	1.97618	5.22829e-07	2.08145e-06	DNA replication complex GINS protein PSF1 (AHRD V1 ***- B6THR1_MAIZE)%3B contains Interpro domain(s) IPR005339 GINS complex%2C Psf1 component
Solyc04g015280	1.97606	1.57201e-11	1.1268e-10	Zinc finger RING-type (AHRD V1 **-- A2Q5E8_MEDTR)%3B contains Interpro domain(s) IPR018957 Zinc finger%2C C3HC4 RING-type
Solyc08g075700	1.9754	3.81354e-31	1.93113e-29	60S ribosomal protein L13 (AHRD V1 ***- Q3HRY7_SOLTU)%3B contains Interpro domain(s) IPR001380 Ribosomal protein L13e
Solyc10g078320	1.9754	2.6382e-21	5.23931e-20	AAA family ATPase CDC48 subfamily (AHRD V1 *--- D7D9J0_STAHD)%3B contains Interpro domain(s) IPR003959 ATPase%2C AAA-type%2C core
Solyc03g080160	1.97497	2.42604e-29	1.04777e-27	Nascent polypeptide-associated complex alpha subunit-like protein (AHRD V1 ***- B6SU89_MAIZE)%3B contains Interpro domain(s) IPR016641 Nascent polypeptide-associated complex%2C alpha subunit
Solyc12g100240	1.97302	0.00316013	0.00645952	Fatty acid desaturase (AHRD V1 ***- B3SP99_CAPAN)
Solyc09g013150	1.9711	0.000111273	0.000302443	Vesicular glutamate transporter 3 (AHRD V1 **-* B5AU16_DANRE)%3B contains Interpro domain(s) IPR016196 Major facilitator superfamily%2C general substrate transporter
Solyc12g040790	1.97093	2.53713e-08	1.21471e-07	Menaquinone biosynthesis methyltransferase ubiE (AHRD V1 *-*- UBIE_LISMH)%3B contains Interpro domain(s) IPR013216 Methyltransferase type 11
Solyc06g071480	1.9709	1.85761e-05	5.75131e-05	Dof zinc finger protein 12 (AHRD V1 *-*- A5HWG1_HORVD)%3B contains Interpro domain(s) IPR003851 Zinc finger%2C Dof-type
Solyc01g073890	1.96921	5.39015e-05	0.000155005	CHP-rich zinc finger protein-like (AHRD V1 *--- Q9FJG5_ARATH)%3B contains Interpro domain(s) IPR011424 C1-like
Solyc01g079110	1.96815	1.07211e-06	4.05511e-06	Histone H3 (AHRD V1 ***- D8L9K7_WHEAT)%3B contains Interpro domain(s) IPR000164 Histone H3
Solyc03g120790	1.96798	0.00607536	0.0116194	Unknown Protein (AHRD V1)
Solyc02g072180	1.96797	1.70101e-14	1.73679e-13	Ras-related protein Rab-25 (AHRD V1 ***- RAB25_BOVIN)%3B contains Interpro domain(s) IPR015595 Rab11-related
Solyc07g053210	1.96771	0.0020373	0.00431995	DNA cross-link repair 1B-like protein (AHRD V1 ***- Q8LQQ4_ORYSJ)%3B contains Interpro domain(s) IPR011084 DNA repair metallo-beta-lactamase
Solyc03g097760	1.96697	0.0125383	0.0223563	Sterile alpha motif domain-containing protein (AHRD V1 ***- D7M2C0_ARALY)
Solyc07g038190	1.96635	1.33495e-06	4.97712e-06	Unknown Protein (AHRD V1)
Solyc03g121260	1.96522	5.62043e-25	1.61949e-23	23S rRNA (Uracil-5-)-methyltransferase RumA (AHRD V1 **** D8F5E6_9DELT)%3B contains Interpro domain(s) IPR001566 23S rRNA methyltransferase/RumA
Solyc06g005130	1.96516	0.000189346	0.000493444	Dof zinc finger protein 12 (AHRD V1 *-*- A5HWG1_HORVD)%3B contains Interpro domain(s) IPR003851 Zinc finger%2C Dof-type
Solyc10g079300	1.96444	7.50126e-05	0.000209993	Calcium-transporting ATPase 1 (AHRD V1 ***- Q7XBH9_CERRI)%3B contains Interpro domain(s) IPR006408 ATPase%2C P-type%2C calcium-transporting%2C PMCA-type
Solyc11g008870	1.96417	1.89902e-22	4.24726e-21	Methylenetetrahydrofolate reductase (AHRD V1 ***- A5ATB7_VITVI)%3B contains Interpro domain(s) IPR004621 Eukaryotic-type methylenetetrahydrofolate reductase
Solyc03g114370	1.96404	2.77996e-26	9.39338e-25	Atp-dependent RNA helicase (AHRD V1 **** B8BY61_THAPS)%3B contains Interpro domain(s) IPR011545 DNA/RNA helicase%2C DEAD/DEAH box type%2C N-terminal
Solyc06g007780	1.96336	1.66836e-15	1.89961e-14	Ras GTPase-activating protein-binding protein 2 (AHRD V1 *--- B5X4A8_SALSA)%3B contains Interpro domain(s) IPR018222 Nuclear transport factor 2%2C Eukaryote
Solyc03g119360	1.9632	1.80502e-30	8.52033e-29	40S ribosomal protein S7-like protein (AHRD V1 ***- Q3HRX6_SOLTU)%3B contains Interpro domain(s) IPR000554 Ribosomal protein S7e
Solyc03g063160	1.9626	2.0201e-05	6.22362e-05	Pentatricopeptide repeat-containing protein (AHRD V1 ***- D7LCN4_ARALY)%3B contains Interpro domain(s) IPR002885 Pentatricopeptide repeat
Solyc03g097820	1.96216	4.47676e-17	5.97335e-16	Transcription factor (AHRD V1 *-** D6MKM4_9ASPA)%3B contains Interpro domain(s) IPR011598 Helix-loop-helix DNA-binding
Solyc03g116970	1.96186	5.92489e-09	3.07404e-08	Sister chromatid cohesion protein pds5 (AHRD V1 *--- PDS5_SCHPO)%3B contains Interpro domain(s) IPR007942 Phospholipase-like%2C arabidopsis
Solyc02g082970	1.96185	3.52416e-16	4.30483e-15	Pentatricopeptide repeat-containing protein (AHRD V1 ***- D7L9H0_ARALY)%3B contains Interpro domain(s) IPR002885 Pentatricopeptide repeat
Solyc02g087190	1.96048	7.28564e-12	5.44019e-11	Peroxidase 65 (AHRD V1 **** B6TYF5_MAIZE)%3B contains Interpro domain(s) IPR002016 Haem peroxidase%2C plant/fungal/bacterial
Solyc07g066470	1.96018	2.90843e-29	1.2475e-27	Porphobilinogen deaminase (AHRD V1 ***- B6TVP0_MAIZE)%3B contains Interpro domain(s) IPR000860 Tetrapyrrole biosynthesis%2C hydroxymethylbilane synthase
Solyc01g108610	1.9599	2.91666e-06	1.03115e-05	Cyclin-dependent kinase inhibitor 12 (AHRD V1 ***- Q6T2Z2_SOYBN)%3B contains Interpro domain(s) IPR016701 Cyclin-dependent kinase inhibitor%2C plant
Solyc09g091370	1.95962	1.24835e-05	3.96832e-05	At1g04650-like protein (Fragment) (AHRD V1 *-*- C0JC61_9BRAS)
Solyc06g073740	1.95913	5.21765e-13	4.45766e-12	Beta-D-glucosidase (AHRD V1 **** Q7XAS3_GOSHI)%3B contains Interpro domain(s) IPR001764 Glycoside hydrolase%2C family 3%2C N-terminal
Solyc12g009840	1.95786	2.44551e-06	8.7379e-06	Pyrophosphate-energized proton pump (AHRD V1 ***- B0SRX3_LEPBP)%3B contains Interpro domain(s) IPR004131 Inorganic H+ pyrophosphatase
Solyc06g074890	1.95761	3.90533e-14	3.81537e-13	Trigger factor (AHRD V1 *-*- B4W095_9CYAN)%3B contains Interpro domain(s) IPR008881 Trigger factor%2C ribosome-binding%2C bacterial
Solyc09g090400	1.95668	9.23135e-10	5.32482e-09	Translation initiation factor 2B (AHRD V1 **** Q2UBN6_ASPOR)%3B contains Interpro domain(s) IPR000649 Initiation factor 2B related
Solyc06g083440	1.95225	4.66752e-15	5.0541e-14	Cytochrome b5 reductase (AHRD V1 *-** Q54XV1_DICDI)%3B contains Interpro domain(s) IPR001199 Cytochrome b5
Solyc09g050120	1.95138	0.0114896	0.0206566	Unknown Protein (AHRD V1)
Solyc12g096590	1.95132	4.89025e-26	1.60337e-24	6 7-dimethyl-8-ribityllumazine synthase (AHRD V1 ***- B2CM14_SOLCH)%3B contains Interpro domain(s) IPR002180 6%2C7-dimethyl-8-ribityllumazine synthase
Solyc05g007150	1.95129	7.62145e-18	1.10396e-16	UDP-galactose transporter 3 (AHRD V1 **** D7KBJ4_ARALY)%3B contains Interpro domain(s) IPR013657 UAA transporter
Solyc04g051880	1.95066	7.45001e-07	2.88228e-06	Mitochondrial transcription termination factor family protein (AHRD V1 *--- D7KVZ3_ARALY)%3B contains Interpro domain(s) IPR003690 Mitochodrial transcription termination factor-related
Solyc07g065250	1.9492	1.69925e-09	9.4814e-09	Serine/threonine protein kinase (AHRD V1 ***- D0NNA3_PHYIN)%3B contains Interpro domain(s) IPR002290 Serine/threonine protein kinase
Solyc04g081590	1.94822	1.24037e-12	1.01361e-11	Receptor like kinase%2C RLK
Solyc04g077130	1.94819	7.61808e-11	5.02355e-10	50S ribosomal protein 6%2C chloroplastic (AHRD V1 ***- PSRP6_ARATH)
Solyc09g008030	1.9469	1.71932e-06	6.29033e-06	TCP family transcription factor (AHRD V1 *-** A6MCZ2_9ORYZ)%3B contains Interpro domain(s) IPR005333 Transcription factor%2C TCP
Solyc02g030120	1.94608	0.000759572	0.00176036	Serine proteinase (Fragment) (AHRD V1 **-- Q43546_LILLO)%3B contains Interpro domain(s) IPR015500 Peptidase S8%2C subtilisin-related
Solyc04g082330	1.94521	2.1216e-19	3.57796e-18	Pre-rRNA-processing protein TSR1 (AHRD V1 *-*- D0MZI1_PHYIN)%3B contains Interpro domain(s) IPR007034 Protein of unknown function DUF663
Solyc12g096960	1.94506	0.000948278	0.00215265	Major allergen Mal d 1.0502 (AHRD V1 ***- Q4VPK6_MALDO)%3B contains Interpro domain(s) IPR000916 Bet v I allergen
Solyc01g068050	1.94498	1.46687e-18	2.27378e-17	tRNA guanosine-2%26apos%3B-O-methyltransferase TRM13 (AHRD V1 ***- TRM13_VANPO)%3B contains Interpro domain(s) IPR007871 Methyltransferase TRM13
Solyc06g082800	1.94488	2.67092e-25	8.00296e-24	Mitochondrial import receptor subunit TOM40 (AHRD V1 ***- B6TEP3_MAIZE)%3B contains Interpro domain(s) IPR001925 Porin%2C eukaryotic type
Solyc01g005540	1.94431	8.40894e-25	2.38279e-23	Lysyl-tRNA synthetase (AHRD V1 ***- B9SBP3_RICCO)%3B contains Interpro domain(s) IPR002313 Lysyl-tRNA synthetase%2C class II
Solyc06g084230	1.94397	2.80384e-27	1.01495e-25	40S ribosomal protein S24 (AHRD V1 ***- C6TAW2_SOYBN)%3B contains Interpro domain(s) IPR001976 Ribosomal protein S24e
Solyc01g006300	1.94277	7.30366e-31	3.59199e-29	Peroxidase (AHRD V1 **** Q43774_SOLLC)%3B contains Interpro domain(s) IPR002016 Haem peroxidase%2C plant/fungal/bacterial
Solyc04g008370	1.94262	7.71176e-05	0.000215661	Serine/threonine kinase receptor (AHRD V1 **** Q7DMS5_BRANA)%3B contains Interpro domain(s) IPR001480 Curculin-like (mannose-binding) lectin
Solyc01g080190	1.9421	1.28696e-09	7.28477e-09	Pentatricopeptide repeat-containing protein (AHRD V1 ***- D7LYJ7_ARALY)%3B contains Interpro domain(s) IPR002885 Pentatricopeptide repeat
Solyc02g076680	1.94184	9.24012e-22	1.92242e-20	Unknown Protein (AHRD V1)%3B contains Interpro domain(s) IPR007789 Protein of unknown function DUF688
Solyc06g069700	1.94181	3.52653e-05	0.000104516	Pentatricopeptide repeat-containing protein (AHRD V1 ***- D7MUK4_ARALY)%3B contains Interpro domain(s) IPR002885 Pentatricopeptide repeat
Solyc04g009330	1.94134	7.8642e-06	2.59156e-05	Serine/threonine-protein kinase 12 (AHRD V1 **** B6SI45_MAIZE)%3B contains Interpro domain(s) IPR002290 Serine/threonine protein kinase
Solyc07g005050	1.94086	1.96329e-29	8.61782e-28	60S ribosomal protein L39 (AHRD V1 ***- D3GC11_9ROSI)%3B contains Interpro domain(s) IPR000077 Ribosomal protein L39e
Solyc01g111740	1.94023	0.0016121	0.00349527	Bzip-like transcription factor-like (AHRD V1 ***- Q7X997_ORYSJ)%3B contains Interpro domain(s) IPR006867 Protein of unknown function DUF632
Solyc04g078190	1.94006	1.12615e-06	4.25011e-06	Lipase-like protein (AHRD V1 **-- Q6ZLH2_ORYSJ)%3B contains Interpro domain(s) IPR006873 Protein of unknown function DUF620
Solyc12g098990	1.93928	4.09138e-22	8.83503e-21	Pentatricopeptide repeat-containing protein (AHRD V1 ***- D7MMK8_ARALY)%3B contains Interpro domain(s) IPR002885 Pentatricopeptide repeat
Solyc09g090900	1.93762	0.000202418	0.000525543	3-isopropylmalate dehydratase large subunit 2 (AHRD V1 **** B6U6T6_MAIZE)%3B contains Interpro domain(s) IPR006251 Homoaconitase/3-isopropylmalate dehydratase%2C large subunit%2C subgroup
Solyc08g059800	1.93702	2.06038e-07	8.70046e-07
Solyc02g081660	1.93567	3.27458e-24	8.78851e-23	GTP-binding protein era homolog (AHRD V1 ***- D7AAD9_STAND)%3B contains Interpro domain(s) IPR005662 GTP-binding protein Era
Solyc01g010540	1.93566	1.05217e-27	3.97729e-26	Ribosomal protein (AHRD V1 ***- B3TM27_ELAGV)%3B contains Interpro domain(s) IPR002942 RNA-binding S4 IPR018079 Ribosomal protein S4%2C conserved site IPR001912 Ribosomal protein S4
Solyc04g009200	1.93283	8.89803e-23	2.05365e-21	Glutamate-1-semialdehyde-2 1-aminomutase (AHRD V1 **** D7MPQ2_ARALY)%3B contains Interpro domain(s) IPR004639 Tetrapyrrole biosynthesis%2C glutamate-1-semialdehyde aminotransferase
Solyc07g006170	1.93271	2.89008e-07	1.19411e-06	Exostosin-like (AHRD V1 ***- Q2HVN7_MEDTR)%3B contains Interpro domain(s) IPR004263 Exostosin-like
Solyc03g112060	1.93054	2.15506e-19	3.63114e-18	Quinolinate synthase A (AHRD V1 *-*- NADA_CYAP4)%3B contains Interpro domain(s) IPR003808 Fe-S metabolism associated SufE
Solyc04g055260	1.92996	3.00168e-05	8.99689e-05	Carboxyl methyltransferase (AHRD V1 **** Q70T29_BIXOR)%3B contains Interpro domain(s) IPR005299 SAM dependent carboxyl methyltransferase
Solyc04g074410	1.92975	4.06634e-06	1.40199e-05
Solyc12g099600	1.92933	1.71916e-07	7.3354e-07	Protein phosphatase 2C containing protein (AHRD V1 ***- B6T998_MAIZE)%3B contains Interpro domain(s) IPR015655 Protein phosphatase 2C
Solyc09g014530	1.9289	1.61367e-05	5.04846e-05	Major latex-like protein (AHRD V1 **-- B5THI3_PANGI)%3B contains Interpro domain(s) IPR000916 Bet v I allergen
Solyc09g082400	1.92879	1.23838e-06	4.64194e-06	Pentatricopeptide repeat-containing protein (AHRD V1 ***- D7KYW1_ARALY)%3B contains Interpro domain(s) IPR002885 Pentatricopeptide repeat
Solyc07g064520	1.92856	3.71055e-26	1.22729e-24	Atp-dependent RNA helicase (AHRD V1 *-** B8BY61_THAPS)%3B contains Interpro domain(s) IPR011545 DNA/RNA helicase%2C DEAD/DEAH box type%2C N-terminal
Solyc07g041020	1.92749	2.80318e-20	5.08825e-19	Cell growth-regulating nucleolar protein (AHRD V1 *--- C1BWD8_ESOLU)%3B contains Interpro domain(s) IPR014898 Zinc finger%2C C2H2%2C LYAR-type
Solyc10g006900	1.92742	7.72666e-20	1.34658e-18	Protochlorophyllide reductase (AHRD V1 ***- Q8LAV9_ARATH)%3B contains Interpro domain(s) IPR005979 Light-dependent protochlorophyllide reductase
Solyc02g070360	1.92616	4.21109e-29	1.78184e-27	40S ribosomal protein S4-like protein (AHRD V1 ***- Q2XPX5_SOLTU)%3B contains Interpro domain(s) IPR000876 Ribosomal protein S4e
Solyc12g044200	1.92597	3.17663e-07	1.30561e-06	Cc-nbs-lrr%2C resistance protein
Solyc07g053670	1.92584	1.83861e-21	3.70622e-20	Unknown Protein (AHRD V1)
Solyc07g045080	1.92398	4.30236e-05	0.000125783	Alcohol dehydrogenase zinc-containing (AHRD V1 **-* B4RDK4_PHEZH)%3B contains Interpro domain(s) IPR002085 Alcohol dehydrogenase superfamily%2C zinc-containing
Solyc03g005040	1.92344	0.00751689	0.0140601	Calmodulin-like protein (AHRD V1 ***- Q0VJ70_DATME)%3B contains Interpro domain(s) IPR011992 EF-Hand type
Solyc05g010240	1.92304	3.19984e-14	3.15566e-13	chaperonin (AHRD V1 ***- B2IXD2_NOSP7)%3B contains Interpro domain(s) IPR001844 Chaperonin Cpn60
Solyc12g008350	1.92301	7.77873e-12	5.78081e-11	Ethylene-responsive transcription factor 4 (AHRD V1 *-*- ERF78_ARATH)%3B contains Interpro domain(s) IPR001471 Pathogenesis-related transcriptional factor and ERF%2C DNA-binding
Solyc01g104400	1.92299	7.71607e-06	2.54587e-05	Blue copper protein (AHRD V1 **-- B6U7P6_MAIZE)%3B contains Interpro domain(s) IPR003245 Plastocyanin-like
Solyc01g097870	1.92274	2.80396e-22	6.16838e-21	40S ribosomal protein S24 (AHRD V1 ***- C6TAW2_SOYBN)%3B contains Interpro domain(s) IPR001976 Ribosomal protein S24e
Solyc02g083780	1.92269	3.49076e-09	1.86468e-08	Pentatricopeptide repeat-containing protein (AHRD V1 ***- D7KWJ0_ARALY)%3B contains Interpro domain(s) IPR002885 Pentatricopeptide repeat
Solyc05g053320	1.92096	3.05731e-06	1.07743e-05	Gag-Pol polyprotein (AHRD V1 ***- B8YLY4_MEDTR)%3B contains Interpro domain(s) IPR001878 Zinc finger%2C CCHC-type
Solyc05g008990	1.9208	6.60445e-15	7.03389e-14	Receptor-like kinase (AHRD V1 *-*- A7VM40_MARPO)%3B contains Interpro domain(s) IPR002290 Serine/threonine protein kinase
Solyc04g074440	1.92079	2.41284e-05	7.35638e-05
Solyc08g077720	1.92055	4.26393e-27	1.51977e-25	60S ribosomal protein L37a (AHRD V1 ***- Q5GMM4_CAPCH)%3B contains Interpro domain(s) IPR002674 Ribosomal protein L37ae
Solyc10g009090	1.92022	1.36078e-10	8.73119e-10	Mitochondrial ornithine transporter (AHRD V1 **** Q16ZQ7_AEDAE)%3B contains Interpro domain(s) IPR002113 Adenine nucleotide translocator 1
Solyc09g059020	1.91829	1.72154e-05	5.36451e-05	Alcohol dehydrogenase zinc-containing (AHRD V1 **** Q6HFT1_BACHK)%3B contains Interpro domain(s) IPR002085 Alcohol dehydrogenase superfamily%2C zinc-containing
Solyc02g038750	1.91807	3.39207e-25	1.00357e-23	WD repeat-containing protein 55 (AHRD V1 **-- C1BNG0_9MAXI)%3B contains Interpro domain(s) IPR017986 WD40 repeat%2C region
Solyc01g079320	1.91804	1.0121e-09	5.8148e-09	Pentatricopeptide repeat-containing protein (AHRD V1 ***- D7KB79_ARALY)%3B contains Interpro domain(s) IPR002885 Pentatricopeptide repeat
Solyc02g082720	1.91718	5.49893e-05	0.000157988	Serine protease Do (AHRD V1 **** B5YER0_DICT6)%3B contains Interpro domain(s) IPR001478 PDZ/DHR/GLGF
Solyc10g080040	1.91582	9.59083e-15	1.00436e-13	Ribonuclease 3 (AHRD V1 *-*- C3BNS5_9BACI)%3B contains Interpro domain(s) IPR000999 Ribonuclease III
Solyc04g016230	1.91562	0.00239874	0.00501768	Glucosyltransferase (AHRD V1 **** D7URL8_9LAMI)%3B contains Interpro domain(s) IPR002213 UDP-glucuronosyl/UDP-glucosyltransferase
Solyc04g071960	1.9141	3.05222e-07	1.2575e-06	2%2C5-dichloro-2%2C5-cyclohexadiene-1%2C4-diol dehydrogenase (AHRD V1 **** LINC_PSEPA)%3B contains Interpro domain(s) IPR002347 Glucose/ribitol dehydrogenase
Solyc02g078720	1.91391	0.000210596	0.000545119	Unknown Protein (AHRD V1)
Solyc08g066810	1.91288	0.0163375	0.0284566	Glycosyl hydrolase family 5 protein/cellulase (AHRD V1 **-- A8NVS8_COPC7)%3B contains Interpro domain(s) IPR001547 Glycoside hydrolase%2C family 5
Solyc02g078390	1.9123	2.0283e-21	4.07111e-20	MutS2 protein (AHRD V1 ***- B0JH18_MICAN)%3B contains Interpro domain(s) IPR005747 DNA mismatch repair protein MutS%2C type 2
Solyc02g027080	1.91212	1.04892e-14	1.09175e-13	Cc-nbs-lrr%2C resistance protein
Solyc12g006620	1.91205	0.00132331	0.00291966	Zinc finger CCCH domain-containing protein 34 (AHRD V1 ***- C3H34_ORYSJ)%3B contains Interpro domain(s) IPR000571 Zinc finger%2C CCCH-type
Solyc06g036310	1.91091	2.8702e-10	1.76448e-09	Heavy metal transport/detoxification protein (AHRD V1 *-*- Q1SWG8_MEDTR)%3B contains Interpro domain(s) IPR006121 Heavy metal transport/detoxification protein
Solyc12g009930	1.91028	3.76974e-11	2.58947e-10	UDP-glucuronosyltransferase 1-6 (AHRD V1 *-*- UD16_MOUSE)%3B contains Interpro domain(s) IPR002213 UDP-glucuronosyl/UDP-glucosyltransferase
Solyc07g045540	1.90832	2.89535e-27	1.04606e-25	Glucose-6-phosphate 1-dehydrogenase (AHRD V1 **** O65856_TOBAC)%3B contains Interpro domain(s) IPR001282 Glucose-6-phosphate dehydrogenase
Solyc01g081240	1.90709	3.07103e-07	1.2647e-06	Pentatricopeptide repeat-containing protein (AHRD V1 ***- D7M3D7_ARALY)%3B contains Interpro domain(s) IPR002885 Pentatricopeptide repeat
Solyc05g010020	1.90708	0.00082574	0.00189671	Unknown Protein (AHRD V1)
Solyc09g092760	1.90669	0.00428284	0.008492	Glycine-rich protein (AHRD V1 *-*- D2K2U4_TOBAC)%3B contains Interpro domain(s) IPR010800 Glycine rich
Solyc12g015780	1.90555	6.99305e-23	1.62597e-21	DNA-directed RNA polymerase subunit D (AHRD V1 ***- A8B9C8_GIALA)%3B contains Interpro domain(s) IPR011263 DNA-directed RNA polymerase%2C RpoA/D/Rpb3-type
Solyc02g086740	1.90519	7.61039e-17	9.93582e-16	50S ribosomal protein L12-C (AHRD V1 ***- Q8LBJ7_ARATH)%3B contains Interpro domain(s) IPR015608 Ribosomal protein L12%2C chloroplast
Solyc03g033350	1.9046	0.00470314	0.00923762	Aspartyl protease family protein (AHRD V1 *-*- D7LTT7_ARALY)
Solyc09g007250	1.90453	5.25215e-30	2.37192e-28	60S ribosomal protein L4/L1 (AHRD V1 ***- D7L8A9_ARALY)%3B contains Interpro domain(s) IPR002136 Ribosomal protein L4/L1e
Solyc05g009720	1.90396	3.88975e-06	1.34654e-05	Myb family transcription factor-like (AHRD V1 **-* Q6Z869_ORYSJ)%3B contains Interpro domain(s) IPR006447 Myb-like DNA-binding region%2C SHAQKYF class
Solyc12g088650	1.90372	2.86847e-12	2.24542e-11	Cyclin D (AHRD V1 ***- Q8GZU3_9ROSI)%3B contains Interpro domain(s) IPR015451 Cyclin D
Solyc03g006970	1.90363	1.32966e-15	1.52785e-14	Subtilisin-like protease (AHRD V1 ***- B6UDX1_MAIZE)%3B contains Interpro domain(s) IPR015500 Peptidase S8%2C subtilisin-related IPR000183 Orn/DAP/Arg decarboxylase 2 IPR000209 Peptidase S8 and S53%2C subtilisin%2C kexin%2C sedolisin
Solyc04g011530	1.90343	6.75087e-22	1.42664e-20
Solyc12g096300	1.90341	1.09315e-28	4.44526e-27	40S ribosomal protein S6 (AHRD V1 ***- B6T1H0_MAIZE)%3B contains Interpro domain(s) IPR014401 Ribosomal protein S6%2C eukaryotic
Solyc12g008700	1.90296	1.59072e-23	4.00066e-22	40S ribosomal protein S30-like (AHRD V1 ***- Q6K853_ORYSJ)%3B contains Interpro domain(s) IPR006846 Ribosomal protein S30
Solyc04g016350	1.90281	2.92684e-10	1.79753e-09	40S ribosomal protein S4-like protein (AHRD V1 ***- Q2XPX5_SOLTU)%3B contains Interpro domain(s) IPR000876 Ribosomal protein S4e
Solyc12g096570	1.9025	1.09554e-06	4.14125e-06	ARGOS (AHRD V1 ***- C7SFP7_SOLLC)
Solyc10g085580	1.90235	4.57959e-20	8.13203e-19	Nucleolar protein 10 (AHRD V1 **-- B6UCL1_MAIZE)%3B contains Interpro domain(s) IPR017986 WD40 repeat%2C region
Solyc03g033500	1.9019	7.74205e-09	3.96645e-08	Cold shock protein-1 (AHRD V1 *-*- Q8LPA7_WHEAT)%3B contains Interpro domain(s) IPR002059 Cold-shock protein%2C DNA-binding
Solyc07g056330	1.9012	2.82384e-18	4.2749e-17	Ribose-phosphate pyrophosphokinase 4 (AHRD V1 ***- D7LJE3_ARALY)%3B contains Interpro domain(s) IPR005946 Phosphoribosyl pyrophosphokinase
Solyc02g090420	1.90073	1.61353e-25	4.98576e-24	50S ribosomal protein L25 (AHRD V1 ***- Q0EYU4_9PROT)%3B contains Interpro domain(s) IPR011035 Ribosomal protein L25/Gln-tRNA synthetase%2C anti-codon-binding domain
Solyc04g072260	1.90069	6.89963e-28	2.65312e-26	Midasin (AHRD V1 ***- B9MXW7_POPTR)%3B contains Interpro domain(s) IPR012099 Midasin
Solyc10g085480	1.89695	2.19292e-27	8.01525e-26	60S ribosomal protein L24 (AHRD V1 ***- B3TM46_ELAGV)%3B contains Interpro domain(s) IPR000988 Ribosomal protein L24e
Solyc02g089990	1.89609	4.70386e-08	2.17289e-07	TMV response-related protein (AHRD V1 *--- B6UG28_MAIZE)
Solyc01g094540	1.89602	3.40876e-11	2.35442e-10	Small nuclear ribonucleoprotein-associated protein B (AHRD V1 *-*- B6T3Z9_MAIZE)%3B contains Interpro domain(s) IPR017131 Small ribonucleoprotein associated%2C SmB/SmN
Solyc08g080040	1.89519	2.26316e-06	8.12654e-06	Anthocyanidin synthase (AHRD V1 ***- D3XFG1_THECC)%3B contains Interpro domain(s) IPR005123 Oxoglutarate and iron-dependent oxygenase
Solyc06g072730	1.89509	0.000519982	0.00124794	Cingulin-like (AHRD V1 ***- Q6Z7G3_ORYSJ)
Solyc04g016390	1.89509	6.43004e-11	4.28677e-10	50S ribosomal protein L33 (AHRD V1 ***- B9RSX3_RICCO)%3B contains Interpro domain(s) IPR001705 Ribosomal protein L33
Solyc06g007210	1.89274	4.56639e-28	1.78355e-26	Unknown Protein (AHRD V1)%3B contains Interpro domain(s) IPR007836 Ribosomal protein L41
Solyc08g066840	1.89172	2.70731e-18	4.1051e-17	Aquaporin-like protein (AHRD V1 ***- O65860_PICAB)%3B contains Interpro domain(s) IPR012269 Aquaporin
Solyc05g008540	1.89153	5.50807e-09	2.87285e-08	Origin recognition complex 4 subunit (AHRD V1 **** Q6EWX1_ARATH)%3B contains Interpro domain(s) IPR016527 Origin recognition complex%2C subunit 4
Solyc02g084900	1.89124	0.000314663	0.000786741	Cell division protease ftsH homolog (AHRD V1 *--- FTSH_BACPE)%3B contains Interpro domain(s) IPR003959 ATPase%2C AAA-type%2C core
Solyc10g084280	1.89069	1.95585e-15	2.20954e-14	Calmodulin-binding protein (AHRD V1 *--* C5HYF8_BRARP)%3B contains Interpro domain(s) IPR000048 IQ calmodulin-binding region
Solyc01g107450	1.8899	2.63345e-18	4.0028e-17	Unknown Protein (AHRD V1)
Solyc04g072070	1.88967	8.00955e-06	2.63115e-05	WRKY transcription factor 16 (AHRD V1 *-*- C9DI05_9ROSI)%3B contains Interpro domain(s) IPR003657 DNA-binding WRKY
Solyc03g097430	1.88837	0.00370068	0.00746053	Unknown Protein (AHRD V1)
Solyc04g063340	1.88744	8.07713e-06	2.65011e-05	Pentatricopeptide repeat-containing protein (AHRD V1 ***- D7L041_ARALY)%3B contains Interpro domain(s) IPR002885 Pentatricopeptide repeat
Solyc10g086020	1.88712	8.31484e-28	3.16216e-26	30S ribosomal protein S12 (AHRD V1 ***- RS12_MYCPU)%3B contains Interpro domain(s) IPR005680 Ribosomal protein S23%2C eukaryotic/archaeal
Solyc06g008260	1.88654	3.58955e-23	8.60165e-22	60 ribosomal protein L14 (AHRD V1 ***- B6TMP6_MAIZE)%3B contains Interpro domain(s) IPR002784 Ribosomal protein L14
Solyc08g078460	1.88574	3.41102e-05	0.000101317	Inositol 2-dehydrogenase like protein (AHRD V1 **-- O23580_ARATH)%3B contains Interpro domain(s) IPR016040 NAD(P)-binding domain
Solyc02g084390	1.88504	2.86373e-18	4.32831e-17	Kinesin like protein (AHRD V1 *-*- Q0WLK7_ARATH)%3B contains Interpro domain(s) IPR001752 Kinesin%2C motor region
Solyc06g066660	1.88465	2.33034e-27	8.48453e-26	Ribosomal protein L37 (AHRD V1 ***- B9RQN1_RICCO)%3B contains Interpro domain(s) IPR001569 Ribosomal protein L37e
Solyc09g090360	1.88354	3.31311e-10	2.01893e-09	Xenotropic and polytropic retrovirus receptor (AHRD V1 **-* B2GU54_XENTR)%3B contains Interpro domain(s) IPR004342 EXS%2C C-terminal
Solyc09g061280	1.8832	6.77017e-14	6.45313e-13	Cyclin dependent kinase inhibitor (AHRD V1 **** Q5PXG5_EUPES)%3B contains Interpro domain(s) IPR016701 Cyclin-dependent kinase inhibitor%2C plant
Solyc09g074300	1.88292	2.45284e-05	7.46623e-05	Histone H2A (AHRD V1 ***- B9REZ0_RICCO)%3B contains Interpro domain(s) IPR002119 Histone H2A
Solyc03g096460	1.88279	0.00128452	0.00283841	Lipoxygenase homology domain-containing protein 1 (AHRD V1 **-- LOXH1_MOUSE)%3B contains Interpro domain(s) IPR001024 Lipoxygenase%2C LH2
Solyc09g092090	1.88248	6.92008e-22	1.46076e-20	50S ribosomal protein L13 (AHRD V1 ***- B6TQ75_MAIZE)%3B contains Interpro domain(s) IPR005823 Ribosomal protein L13%2C bacterial-type
Solyc02g071000	1.88236	0.000138001	0.000369109	Chlorophyll a/b binding protein (AHRD V1 **** Q41425_SOLTU)%3B contains Interpro domain(s) IPR001344 Chlorophyll A-B binding protein
Solyc07g049560	1.88196	4.56044e-06	1.55918e-05	Tyrosine phosphatase family protein (AHRD V1 **** B8N9Z8_ASPFN)%3B contains Interpro domain(s) IPR020428 Protein-tyrosine phosphatase%2C dual specificity phosphatase%2C eukaryotic
Solyc06g082140	1.88166	6.66621e-26	2.15556e-24	Unknown Protein (AHRD V1)%3B contains Interpro domain(s) IPR007836 Ribosomal protein L41
Solyc01g086710	1.88161	1.58881e-23	4.00066e-22	DNA-directed RNA polymerase (AHRD V1 ***- B9SVH7_RICCO)%3B contains Interpro domain(s) IPR015712 DNA-directed RNA polymerase%2C subunit 2
Solyc08g074970	1.88107	0.0129636	0.0230392	Glycosyl transferase group 1 (AHRD V1 **** A9B8A9_HERA2)%3B contains Interpro domain(s) IPR001296 Glycosyl transferase%2C group 1
Solyc09g075820	1.88038	6.87079e-11	4.55796e-10	Solute carrier family 2%2C facilitated glucose transporter member 3 (AHRD V1 ***- GTR3_CANFA)%3B contains Interpro domain(s) IPR003663 Sugar/inositol transporter
Solyc10g081930	1.87857	0.0027382	0.00566985	Unknown Protein (AHRD V1)
Solyc02g069170	1.87665	8.42471e-07	3.23737e-06
Solyc10g086510	1.87576	2.22885e-20	4.08124e-19	Mitochondrial import inner membrane translocase subunit tim9 (AHRD V1 ***- A6MZE3_ORYSI)%3B contains Interpro domain(s) IPR004217 Mitochondrial inner membrane translocase complex%2C Tim8/9/10/13-zinc finger-like
Solyc03g097900	1.87509	9.59913e-26	3.05659e-24	40S ribosomal protein S1 (AHRD V1 ***- RS3A_LENED)%3B contains Interpro domain(s) IPR001593 Ribosomal protein S3Ae
Solyc11g012870	1.87272	1.66719e-15	1.89943e-14	LysM domain containing protein (AHRD V1 *-*- Q2R2V0_ORYSJ)%3B contains Interpro domain(s) IPR002482 Peptidoglycan-binding Lysin subgroup
Solyc05g013990	1.87219	3.04176e-22	6.66033e-21	T-complex protein 1 subunit epsilon (AHRD V1 ***- B6TSC6_MAIZE)%3B contains Interpro domain(s) IPR012718 T-complex protein 1%2C epsilon subunit
Solyc06g083180	1.87092	7.67329e-29	3.18761e-27	40S ribosomal protein S8 (AHRD V1 ***- Q0E158_ORYSJ)%3B contains Interpro domain(s) IPR001047 Ribosomal protein S8e
Solyc06g068320	1.87043	1.78304e-27	6.60708e-26	Prolyl-tRNA synthetase (AHRD V1 **** Q54Q07_DICDI)%3B contains Interpro domain(s) IPR004499 Prolyl-tRNA synthetase%2C class IIa%2C prokaryotic-type
Solyc10g084940	1.87018	2.57634e-24	6.98438e-23	Solute carrier family 15 member 4 (AHRD V1 **-- S15A4_XENLA)%3B contains Interpro domain(s) IPR000109 TGF-beta receptor%2C type I/II extracellular region
Solyc04g081850	1.87002	6.45365e-16	7.62545e-15	UPF0436 protein C9orf6 homolog (AHRD V1 ***- CI006_XENLA)%3B contains Interpro domain(s) IPR011053 Single hybrid motif
Solyc02g092390	1.86989	6.53853e-08	2.95856e-07	Unknown Protein (AHRD V1)
Solyc05g051870	1.8692	8.25953e-10	4.78925e-09	Pollen allergen Phl p 11 (AHRD V1 ***- B6T2Z8_MAIZE)%3B contains Interpro domain(s) IPR006041 Pollen Ole e 1 allergen and extensin
Solyc07g008860	1.8679	3.38922e-25	1.00357e-23	Guanine nucleotide-binding protein subunit beta-like protein (AHRD V1 **-* GBLP_DICDI)%3B contains Interpro domain(s) IPR020472 G-protein beta WD-40 repeat%2C region
Solyc06g069880	1.86729	4.78398e-06	1.62967e-05	Phytochrome kinase substrate 1 (AHRD V1 ***- D7LQB9_ARALY)
Solyc03g025520	1.86707	2.71928e-27	9.86239e-26	60S ribosomal protein L36 (AHRD V1 ***- B9I1L9_POPTR)%3B contains Interpro domain(s) IPR000509 Ribosomal protein L36e
Solyc03g112790	1.86654	0.000573297	0.00136163	Genomic DNA chromosome 5 TAC clone K6A12 (AHRD V1 ***- Q9FGR6_ARATH)
Solyc02g081200	1.86575	6.35379e-21	1.2306e-19	At1g62390-like protein (Fragment) (AHRD V1 *--- C0JCT1_9BRAS)%3B contains Interpro domain(s) IPR011990 Tetratricopeptide-like helical
Solyc05g012390	1.86562	1.5461e-26	5.30047e-25	Pentatricopeptide repeat-containing protein (AHRD V1 ***- D7KQQ2_ARALY)%3B contains Interpro domain(s) IPR002885 Pentatricopeptide repeat
Solyc10g005510	1.86551	4.3722e-13	3.76791e-12	Glyceraldehyde-3-phosphate dehydrogenase (AHRD V1 **** Q8VWN9_CAPAN)%3B contains Interpro domain(s) IPR000173 Glyceraldehyde 3-phosphate dehydrogenase
Solyc12g097000	1.86492	1.58146e-10	1.00647e-09	Tir%2C resistance protein fragment
Solyc12g099330	1.86426	1.39884e-16	1.77688e-15	Unknown Protein (AHRD V1)
Solyc09g074470	1.86391	6.75129e-05	0.000190531	Kinase interacting family protein (AHRD V1 ***- D7KCF2_ARALY)%3B contains Interpro domain(s) IPR011684 KIP1-like
Solyc06g068880	1.86338	1.2952e-06	4.83948e-06	Serine carboxypeptidase 1 (AHRD V1 **** B6U0V5_MAIZE)%3B contains Interpro domain(s) IPR001563 Peptidase S10%2C serine carboxypeptidase
Solyc05g005170	1.86278	1.57886e-05	4.94533e-05	Polygalacturonase 2 (AHRD V1 ***- A8D0T9_ONCHC)%3B contains Interpro domain(s) IPR012334 Pectin lyase fold
Solyc10g075020	1.86197	2.38846e-21	4.76349e-20	Elongation factor P (AHRD V1 ***- B6UC94_MAIZE)%3B contains Interpro domain(s) IPR011768 Translation elongation factor P
Solyc02g071530	1.86163	5.17503e-06	1.7543e-05	Flap structure-specific endonuclease (AHRD V1 *--- FEN_CALMQ)%3B contains Interpro domain(s) IPR006084 DNA repair protein (XPGC)/yeast Rad
Solyc04g008460	1.86131	1.88621e-27	6.96192e-26	Ribosomal protein L15 (AHRD V1 ***- B9GPA1_POPTR)%3B contains Interpro domain(s) IPR000439 Ribosomal protein L15e
Solyc01g099560	1.86101	8.49484e-11	5.58016e-10	Carbonyl reductase 3 (AHRD V1 **** B6TRS7_MAIZE)%3B contains Interpro domain(s) IPR002347 Glucose/ribitol dehydrogenase
Solyc05g007930	1.86092	8.40246e-10	4.86519e-09	Beta-1 3-galactosyltransferase-like protein (AHRD V1 **** D8SVH6_SELML)%3B contains Interpro domain(s) IPR002659 Glycosyl transferase%2C family 31
Solyc12g006980	1.86091	1.94194e-12	1.54852e-11	Leucine-rich repeat receptor-like protein kinase PEPR2 (AHRD V1 *--* PEPR2_ARATH)%3B contains Interpro domain(s) IPR001611 Leucine-rich repeat
Solyc03g007470	1.85946	5.52466e-14	5.33634e-13	Ubiquitin-conjugating enzyme E2 10 (AHRD V1 **** UBC10_ARATH)%3B contains Interpro domain(s) IPR000608 Ubiquitin-conjugating enzyme%2C E2
Solyc04g007170	1.85867	2.46212e-05	7.49082e-05	Unknown Protein (AHRD V1)
Solyc02g088740	1.85854	5.30393e-12	4.02443e-11	Genomic DNA chromosome 5 TAC clone K3 (AHRD V1 ***- Q9FL84_ARATH)
Solyc11g071620	1.85828	2.58025e-25	7.74365e-24	Aldehyde oxidase (AHRD V1 ***- Q9FV25_SOLLC)%3B contains Interpro domain(s) IPR016208 Aldehyde oxidase/xanthine dehydrogenase
Solyc07g005740	1.85653	7.9265e-06	2.60706e-05	Pentatricopeptide repeat-containing protein (AHRD V1 ***- D7LZR6_ARALY)%3B contains Interpro domain(s) IPR002885 Pentatricopeptide repeat
Solyc12g035710	1.85611	4.04656e-06	1.39568e-05	Cbs domain containing protein expressed (Fragment) (AHRD V1 *--- A6N095_ORYSI)%3B contains Interpro domain(s) IPR002550 Protein of unknown function DUF21
Solyc08g016180	1.85604	8.3807e-25	2.37837e-23	60S ribosomal protein L18a (AHRD V1 ***- D2D962_9ROSI)%3B contains Interpro domain(s) IPR002670 Ribosomal protein L18ae
Solyc02g094450	1.85578	1.243e-15	1.43353e-14	Unknown Protein (AHRD V1)
Solyc12g038370	1.85418	5.27832e-10	3.12622e-09	Single-stranded DNA-binding protein (AHRD V1 ***- B6U5B2_MAIZE)%3B contains Interpro domain(s) IPR012340 Nucleic acid-binding%2C OB-fold
Solyc01g100380	1.85337	1.92919e-24	5.29877e-23	Calreticulin 2 calcium-binding protein (AHRD V1 **** A8HMC0_CHLRE)%3B contains Interpro domain(s) IPR009169 Calreticulin
Solyc06g063130	1.85296	3.82642e-14	3.74606e-13	Conserved protein (Fungal and plant) (AHRD V1 *--- D4AZ45_ARTBC)%3B contains Interpro domain(s) IPR018786 Protein of unknown function DUF2343
Solyc10g050930	1.85197	6.28077e-08	2.84948e-07	Unknown Protein (AHRD V1)
Solyc05g054810	1.85168	6.38419e-29	2.67126e-27	60S ribosomal protein L35 (AHRD V1 ***- D7M7V2_ARALY)%3B contains Interpro domain(s) IPR001854 Ribosomal protein L29
Solyc06g083170	1.84931	6.943e-05	0.000195413	Transcription factor (AHRD V1 *-** D6MKM4_9ASPA)%3B contains Interpro domain(s) IPR011598 Helix-loop-helix DNA-binding
Solyc06g082650	1.8488	4.54752e-22	9.78628e-21	60S ribosomal protein L10 (AHRD V1 ***- Q3SC85_SOLLC)%3B contains Interpro domain(s) IPR001197 Ribosomal protein L10e
Solyc04g081130	1.84874	0.00830619	0.0154	Glyoxal oxidase (AHRD V1 ***- B6TJK4_MAIZE)%3B contains Interpro domain(s) IPR009880 Glyoxal oxidase%2C N-terminal
Solyc01g006940	1.8485	1.24621e-16	1.58729e-15	Poly(U)-binding-splicing factor PUF60 (AHRD V1 *--* PUF60_BOVIN)%3B contains Interpro domain(s) IPR003954 RNA recognition%2C region 1
Solyc06g069090	1.84838	1.98988e-25	6.04916e-24	40S ribosomal protein S7-like protein (AHRD V1 ***- Q3HRX6_SOLTU)%3B contains Interpro domain(s) IPR000554 Ribosomal protein S7e
Solyc06g062840	1.84832	1.48655e-13	1.35968e-12	Threonine synthase (AHRD V1 **** Q2Q021_SOYBN)%3B contains Interpro domain(s) IPR004450 Threonine synthase
Solyc02g086240	1.84801	5.18189e-28	2.01881e-26	50S ribosomal protein L5 (AHRD V1 ***- RL5_XANP2)%3B contains Interpro domain(s) IPR002132 Ribosomal protein L5
Solyc10g081730	1.84788	2.87827e-07	1.18949e-06
Solyc12g014350	1.84763	3.54394e-11	2.43972e-10	Receptor like kinase%2C RLK
Solyc12g100160	1.84757	1.53844e-19	2.61326e-18	50S ribosomal protein L6 (AHRD V1 ***- B6SL57_MAIZE)%3B contains Interpro domain(s) IPR019906 Ribosomal protein L6%2C subgroup
Solyc05g052040	1.84718	5.30098e-24	1.4007e-22	Ethylene responsive transcription factor 1a (AHRD V1 *-** D1MWZ3_CITLA)%3B contains Interpro domain(s) IPR001471 Pathogenesis-related transcriptional factor and ERF%2C DNA-binding
Solyc06g005860	1.84653	2.5975e-14	2.59847e-13	Polyribonucleotide nucleotidyltransferase (AHRD V1 **-- PNP_CYTH3)%3B contains Interpro domain(s) IPR011016 Zinc finger%2C RING-CH-type
Solyc06g034230	1.84625	5.60645e-08	2.56398e-07	Unknown Protein (AHRD V1)%3B contains Interpro domain(s) IPR001578 Peptidase C12%2C ubiquitin carboxyl-terminal hydrolase 1
Solyc06g005220	1.84612	2.08307e-06	7.53167e-06	Pentatricopeptide repeat-containing protein (AHRD V1 ***- D7L1Q4_ARALY)%3B contains Interpro domain(s) IPR002885 Pentatricopeptide repeat
Solyc06g083780	1.84547	1.22713e-21	2.51681e-20	50S ribosomal protein L14 (AHRD V1 ***- RL14_DEHE1)%3B contains Interpro domain(s) IPR000218 Ribosomal protein L14b/L23e
Solyc06g071960	1.84343	7.94757e-27	2.78565e-25	Nucleoside diphosphate kinase (AHRD V1 **** B9RAM1_RICCO)%3B contains Interpro domain(s) IPR001564 Nucleoside diphosphate kinase%2C core
Solyc11g008710	1.84319	2.71178e-22	5.9796e-21	30S ribosomal protein S5 (AHRD V1 *-*- C7R892_KANKD)%3B contains Interpro domain(s) IPR000851 Ribosomal protein S5
Solyc08g008320	1.84235	4.18117e-16	5.05156e-15	Inner membrane protein oxaA (AHRD V1 *-*- OXAA_WOLSU)%3B contains Interpro domain(s) IPR001708 Membrane insertion protein%2C OxaA/YidC
Solyc01g108390	1.84174	1.61628e-13	1.47117e-12	Proteinase inhibitor (AHRD V1 ***- D6BR63_9ROSI)%3B contains Interpro domain(s) IPR000864 Proteinase inhibitor I13%2C potato inhibitor I
Solyc11g007030	1.84111	0.00192562	0.00410678	Hydrolase alpha/beta fold family protein (AHRD V1 ***- D7LIQ3_ARALY)%3B contains Interpro domain(s) IPR000073 Alpha/beta hydrolase fold-1
Solyc02g070890	1.84023	6.58079e-07	2.57141e-06	Receptor like kinase%2C RLK
Solyc02g014030	1.83981	2.36155e-13	2.10268e-12	Pto-like%2C Serine/threonine kinase protein%2C resistance protein
Solyc09g018220	1.83972	8.17658e-07	3.14717e-06	Cc-nbs-lrr%2C resistance protein
Solyc12g036330	1.83966	9.83073e-06	3.18486e-05	Receptor-like protein kinase At3g21340 (AHRD V1 *-*- RLK6_ARATH)%3B contains Interpro domain(s) IPR002290 Serine/threonine protein kinase
Solyc04g072570	1.83923	1.13281e-13	1.04993e-12	Receptor like kinase%2C RLK
Solyc09g011360	1.83779	2.33164e-12	1.8444e-11	Mitochondrial carrier protein expressed (AHRD V1 ***- Q10NJ7_ORYSJ)%3B contains Interpro domain(s) IPR002113 Adenine nucleotide translocator 1
Solyc06g075340	1.83645	1.73102e-25	5.33126e-24	Carbamoyl-phosphate synthase large chain (AHRD V1 **** D7AI57_GEOSK)%3B contains Interpro domain(s) IPR006275 Carbamoyl phosphate synthase%2C large subunit%2C glutamine-dependent
Solyc03g116020	1.83628	1.69142e-26	5.77759e-25	DNA-directed RNA polymerase (AHRD V1 *--- B9RC12_RICCO)
Solyc05g012510	1.83586	2.23615e-23	5.49875e-22	Phosphorylase (AHRD V1 **** B9HXL0_POPTR)%3B contains Interpro domain(s) IPR011833 Glycogen/starch/alpha-glucan phosphorylase
Solyc07g052340	1.83491	1.0369e-13	9.67244e-13	Exosome complex exonuclease RRP6-like protein (AHRD V1 *--- D0MWN1_PHYIN)%3B contains Interpro domain(s) IPR002562 3'-5' exonuclease
Solyc07g008900	1.8338	1.29219e-12	1.05504e-11	Subtilisin-like serine protease (AHRD V1 **-* Q948Q4_ARATH)%3B contains Interpro domain(s) IPR015500 Peptidase S8%2C subtilisin-related
Solyc04g008030	1.83282	1.85871e-10	1.17258e-09	Cleavage and polyadenylation specificity factor subunit 3 (AHRD V1 **-- B0WXD2_CULQU)%3B contains Interpro domain(s) IPR001279 Beta-lactamase-like
Solyc01g006160	1.83195	3.39788e-14	3.34219e-13	Unknown Protein (AHRD V1)
Solyc06g062880	1.8309	3.72689e-05	0.000110055	Protein Brevis radix-like 2 (AHRD V1 ***- BRXL2_ARATH)%3B contains Interpro domain(s) IPR013591 Disease resistance/zinc finger/chromosome condensation-like region
Solyc06g083370	1.83063	0.00147194	0.00322263
Solyc06g074390	1.83035	3.4561e-13	3.01438e-12	Fatty acyl coA reductase (AHRD V1 **** Q8L4M0_WHEAT)%3B contains Interpro domain(s) IPR013120 Male sterility%2C NAD-binding
Solyc03g111690	1.82902	1.30912e-14	1.34912e-13	Pectate lyase (AHRD V1 **** Q2Z1Y4_PRUMU)%3B contains Interpro domain(s) IPR002022 Pectate lyase/Amb allergen
Solyc05g009370	1.82883	1.07819e-22	2.47024e-21	50S ribosomal protein L15 (AHRD V1 *-*- B4B3P1_9CHRO)%3B contains Interpro domain(s) IPR005749 Ribosomal protein L15%2C bacterial-type
Solyc04g071660	1.82863	6.59635e-15	7.02925e-14	Unknown Protein (AHRD V1)
Solyc09g098290	1.82861	8.85172e-13	7.37134e-12	Receptor like kinase%2C RLK
Solyc02g081270	1.8281	0.000777638	0.00179743	NAC domain protein IPR003441 (AHRD V1 ***- B9MWW7_POPTR)%3B contains Interpro domain(s) IPR003441 No apical meristem (NAM) protein
Solyc10g008610	1.82764	0.00010531	0.000287317	Unknown Protein (AHRD V1)
Solyc04g015460	1.82761	2.54384e-10	1.57467e-09	S-receptor kinase (AHRD V1 ***- Q9FZP3_ARATH)%3B contains Interpro domain(s) IPR002290 Serine/threonine protein kinase
Solyc02g079160	1.8273	2.84122e-05	8.54458e-05	Unknown Protein (AHRD V1)
Solyc05g013170	1.82716	1.99999e-18	3.06475e-17	Unknown Protein (AHRD V1)%3B contains Interpro domain(s) IPR012891 GCK
Solyc06g007970	1.82687	1.62733e-06	5.97824e-06	Male sterility 5 family protein (Fragment) (AHRD V1 *--- B1Q393_BRAOT)%3B contains Interpro domain(s) IPR011990 Tetratricopeptide-like helical
Solyc01g091340	1.82663	1.80884e-12	1.44916e-11	Peptidyl-prolyl cis-trans isomerase (AHRD V1 *-*- Q7VAT7_PROMA)%3B contains Interpro domain(s) IPR001179 Peptidyl-prolyl cis-trans isomerase%2C FKBP-type
Solyc09g075160	1.82557	1.29491e-22	2.95955e-21	60S ribosomal protein L22-2 (AHRD V1 ***- D7L3W0_ARALY)%3B contains Interpro domain(s) IPR002671 Ribosomal protein L22e
Solyc12g009310	1.8251	1.81442e-08	8.84242e-08	ATP binding / serine-threonine kinase (AHRD V1 **** C5DB71_VITVI)%3B contains Interpro domain(s) IPR002290 Serine/threonine protein kinase
Solyc03g122000	1.8246	1.48089e-06	5.48424e-06	Cytochrome b6-f complex subunit 4 (AHRD V1 *-*- D3WCD7_NEROL)%3B contains Interpro domain(s) IPR005870 Cytochrome b6/f complex%2C subunit IV
Solyc02g085520	1.82445	1.61271e-22	3.63721e-21	Adenylosuccinate synthetase%2C chloroplastic (AHRD V1 **** PURA_SOLBU)%3B contains Interpro domain(s) IPR001114 Adenylosuccinate synthetase
Solyc03g093630	1.82422	0.000100232	0.000274619	Pentatricopeptide repeat-containing protein (AHRD V1 ***- D7LJ24_ARALY)%3B contains Interpro domain(s) IPR002885 Pentatricopeptide repeat
Solyc07g042520	1.82419	1.04396e-06	3.95742e-06	Sucrose synthase 4 (AHRD V1 **** Q7Y078_SOLTU)%3B contains Interpro domain(s) IPR012820 Sucrose synthase%2C plants and cyanobacteria IPR000368 Sucrose synthase
Solyc01g065510	1.82367	1.14965e-06	4.33268e-06	Unknown Protein (AHRD V1)
Solyc02g070100	1.82322	7.30587e-19	1.16615e-17	ATP-dependent RNA helicase (AHRD V1 ***- C6LRM7_GIALA)%3B contains Interpro domain(s) IPR011545 DNA/RNA helicase%2C DEAD/DEAH box type%2C N-terminal
Solyc06g076040	1.82312	2.78794e-23	6.76705e-22	U-box domain-containing protein (AHRD V1 **-- D7KBV1_ARALY)%3B contains Interpro domain(s) IPR011989 Armadillo-like helical
Solyc07g008330	1.8227	8.88603e-23	2.05341e-21	Nucleolar and coiled-body phosphoprotein 1-like (AHRD V1 *--- B8JIY2_DANRE)%3B contains Interpro domain(s) IPR007718 SRP40%2C C-terminal
Solyc11g007710	1.82155	4.63001e-08	2.14299e-07	DUF455 domain-containing protein (AHRD V1 **-- C1G075_PARBD)%3B contains Interpro domain(s) IPR011197 Protein of unknown function UCP012318
Solyc06g072600	1.82053	2.24259e-20	4.10238e-19	Mitochondrial import inner membrane translocase subunit Tim8 (AHRD V1 ***- B6SQH6_MAIZE)%3B contains Interpro domain(s) IPR004217 Mitochondrial inner membrane translocase complex%2C Tim8/9/10/13-zinc finger-like
Solyc12g009580	1.81994	2.2632e-10	1.40978e-09	CRABS CLAW (Fragment) (AHRD V1 **-- Q5EMM7_GOSHI)%3B contains Interpro domain(s) IPR006780 YABBY protein
Solyc12g094700	1.81969	2.68202e-05	8.09301e-05	Cathepsin B-like cysteine proteinase (AHRD V1 **-- CYSP_SCHMA)%3B contains Interpro domain(s) IPR013128 Peptidase C1A%2C papain
Solyc02g090620	1.81927	2.92018e-09	1.57693e-08	Unknown Protein (AHRD V1)
Solyc03g113290	1.81895	0.000687525	0.00160693	Unknown Protein (AHRD V1)
Solyc10g007840	1.81847	9.31199e-26	2.97019e-24	Glutamyl-tRNA(Gln) amidotransferase subunit A (AHRD V1 ***- A8YF31_MICAE)%3B contains Interpro domain(s) IPR004412 Glutamyl-tRNA(Gln) amidotransferase A subunit
Solyc01g086820	1.81803	0.000223902	0.000576385	Histone H3 (AHRD V1 ***- D8L9K7_WHEAT)%3B contains Interpro domain(s) IPR000164 Histone H3
Solyc06g071460	1.8171	9.89332e-15	1.03476e-13	Exosome complex exonuclease RRP40 (AHRD V1 ***- B6TDY7_MAIZE)
Solyc12g007050	1.81676	8.58494e-06	2.80106e-05	Unknown Protein (AHRD V1)%3B contains Interpro domain(s) IPR009424 Protein of unknown function DUF1070
Solyc06g073800	1.81519	4.93663e-21	9.6408e-20	40S ribosomal protein S11 (AHRD V1 ***- D7MBM0_ARALY)%3B contains Interpro domain(s) IPR000266 Ribosomal protein S17
Solyc02g092980	1.81498	1.93106e-10	1.21428e-09	Cyclin D-like protein (AHRD V1 ***- Q5U8T4_TOBAC)%3B contains Interpro domain(s) IPR006671 Cyclin%2C N-terminal
Solyc01g089970	1.81433	8.55523e-19	1.35406e-17	Nucleoside diphosphate kinase (AHRD V1 ***- Q3Y5A4_SOLCH)%3B contains Interpro domain(s) IPR001564 Nucleoside diphosphate kinase%2C core
Solyc03g117480	1.81373	6.84254e-20	1.19917e-18	Pyrophosphate-energized proton pump (Pyrophosphate-energized inorganic pyrophosphatase) (H(+)-PPase) (AHRD V1 **** C7HW54_9FIRM)%3B contains Interpro domain(s) IPR004131 Inorganic H+ pyrophosphatase
Solyc04g016480	1.81316	2.45126e-05	7.46384e-05	Calmodulin binding protein (AHRD V1 *--* B4FU94_MAIZE)%3B contains Interpro domain(s) IPR000048 IQ calmodulin-binding region
Solyc06g075850	1.81147	7.45878e-11	4.92369e-10	Histone H4 (AHRD V1 ***- B6T0P4_MAIZE)%3B contains Interpro domain(s) IPR001951 Histone H4
Solyc05g014380	1.81009	1.50373e-13	1.37472e-12	Multidrug resistance protein ABC transporter family (AHRD V1 ***- B9HTC0_POPTR)%3B contains Interpro domain(s) IPR001140 ABC transporter%2C transmembrane region
Solyc12g011140	1.80937	1.72764e-11	1.23131e-10	Subtilisin-like protease (AHRD V1 ***- Q6WNU4_SOYBN)%3B contains Interpro domain(s) IPR015500 Peptidase S8%2C subtilisin-related
Solyc02g083470	1.80886	4.74067e-20	8.39044e-19	Pre-rRNA-processing protein ESF1 (AHRD V1 *-*- C5FM19_NANOT)
Solyc03g111230	1.80768	2.86193e-25	8.56164e-24	60S ribosomal protein L17 (AHRD V1 ***- D7KV33_ARALY)%3B contains Interpro domain(s) IPR018260 Ribosomal protein L22/L17%2C conserved site
Solyc01g095600	1.8064	0.00128296	0.00283563	Pentatricopeptide repeat-containing protein (AHRD V1 ***- D7L041_ARALY)%3B contains Interpro domain(s) IPR002885 Pentatricopeptide repeat
Solyc04g063290	1.80622	2.27739e-22	5.06336e-21	30S ribosomal protein S5 (AHRD V1 ***- C5K1T7_AJEDS)%3B contains Interpro domain(s) IPR005711 Ribosomal protein S5%2C eukaryotic/archaeal
Solyc03g025690	1.80551	2.55129e-07	1.06277e-06	Unknown Protein (AHRD V1)
Solyc10g084310	1.80488	4.34238e-18	6.45414e-17	30S ribosomal protein S12 (AHRD V1 ***- RS12_MYCPU)%3B contains Interpro domain(s) IPR005680 Ribosomal protein S23%2C eukaryotic/archaeal
Solyc12g056930	1.80485	4.9513e-21	9.6594e-20	Sulfate transporter 2 (AHRD V1 ***- Q9AT47_SOLLC)%3B contains Interpro domain(s) IPR001902 Sulphate anion transporter
Solyc01g106260	1.80478	9.50151e-22	1.97461e-20	Chaperone DnaK (AHRD V1 ***- A2Q199_MEDTR)%3B contains Interpro domain(s) IPR012725 Chaperone DnaK
Solyc08g066490	1.8032	1.5999e-11	1.14504e-10	Receptor like kinase%2C RLK
Solyc02g090480	1.80208	0.000267475	0.000678236	Peptidyl-prolyl cis-trans isomerase D (AHRD V1 **** PPID_RAT)%3B contains Interpro domain(s) IPR002130 Peptidyl-prolyl cis-trans isomerase%2C cyclophilin-type
Solyc02g093100	1.80019	1.11414e-06	4.20732e-06	Receptor like kinase%2C RLK
Solyc03g123530	1.80018	5.45325e-18	8.02273e-17	CCAAT-box-binding transcription factor-like protein (AHRD V1 **** Q6YU01_ORYSJ)%3B contains Interpro domain(s) IPR005612 CCAAT-binding factor
Solyc11g071490	1.79961	2.18271e-23	5.38143e-22	Ribosomal protein L30 (AHRD V1 ***- B3TLP4_ELAGV)%3B contains Interpro domain(s) IPR000231 Ribosomal protein L30e
Solyc11g005620	1.7987	9.2756e-24	2.40692e-22	Acetylglutamate kinase-like protein (AHRD V1 ***- Q949B4_ORYSA)%3B contains Interpro domain(s) IPR011148 N-acetylglutamate kinase
Solyc02g082500	1.79842	5.24639e-16	6.27396e-15	50S ribosomal protein L11 (AHRD V1 ***- B4FC48_MAIZE)%3B contains Interpro domain(s) IPR006519 Ribosomal protein L11%2C bacterial-type
Solyc08g080960	1.79835	3.76873e-08	1.76127e-07	AT-hook motif nuclear localized protein 1 (AHRD V1 ***- O04696_PEA)%3B contains Interpro domain(s) IPR005175 Protein of unknown function DUF296
Solyc11g008060	1.79785	0.00041237	0.00100927	Pullulanase type I (AHRD V1 *-*- B1B8Z3_CLOBO)%3B contains Interpro domain(s) IPR004193 Glycoside hydrolase%2C family 13%2C N-terminal
Solyc08g075080	1.79771	4.36565e-06	1.49749e-05	Ring finger protein 12 (AHRD V1 *-*- Q4V889_RAT)%3B contains Interpro domain(s) IPR018957 Zinc finger%2C C3HC4 RING-type
Solyc04g079380	1.79679	1.32397e-14	1.36293e-13	30S ribosomal protein S14 (AHRD V1 ***- A3VT32_9PROT)%3B contains Interpro domain(s) IPR001209 Ribosomal protein S14
Solyc07g064810	1.79652	1.73488e-23	4.35155e-22	Imidazole glycerol phosphate synthase subunit hisF (AHRD V1 *-** D2RFM3_ARCPA)%3B contains Interpro domain(s) IPR014640 Imidazole glycerol phosphate synthase HisHF
Solyc11g006690	1.7962	1.17988e-27	4.43329e-26	40S ribosomal protein S17-like protein (AHRD V1 ***- Q3HRX4_SOLTU)%3B contains Interpro domain(s) IPR001210 Ribosomal protein S17e
Solyc11g072620	1.79614	0.0142443	0.0251275	Unknown Protein (AHRD V1)
Solyc10g078620	1.79534	7.42098e-25	2.11239e-23	Ribosomal protein S5 (AHRD V1 ***- A8J2I5_CHLRE)%3B contains Interpro domain(s) IPR005716 Ribosomal protein S7%2C eukaryotic/archaeal
Solyc02g030080	1.79511	9.35586e-21	1.78445e-19	WD-40 repeat protein (AHRD V1 *-*- B4D682_9BACT)%3B contains Interpro domain(s) IPR017986 WD40 repeat%2C region
Solyc01g081560	1.7946	0.000709949	0.00165523	Pentatricopeptide repeat-containing protein (AHRD V1 ***- D7MHD4_ARALY)%3B contains Interpro domain(s) IPR002885 Pentatricopeptide repeat
Solyc01g097600	1.79453	4.80846e-15	5.20072e-14	tRNA pseudouridine synthase D (AHRD V1 ***- D3BIM4_POLPA)%3B contains Interpro domain(s) IPR001656 Pseudouridine synthase%2C TruD
Solyc07g006110	1.79435	7.17285e-11	4.74494e-10	Receptor like kinase%2C RLK
Solyc12g042480	1.79333	1.09429e-09	6.26018e-09	Cytochrome P450
Solyc10g079290	1.79306	1.73912e-16	2.19134e-15	Outer envelope membrane protein (AHRD V1 **-- Q31PR1_SYNE7)%3B contains Interpro domain(s) IPR000184 Bacterial surface antigen (D15)
Solyc07g016150	1.79118	1.81186e-24	5.00578e-23	Elongation factor 1-beta (AHRD V1 ***- D7KES3_ARALY)%3B contains Interpro domain(s) IPR014038 Translation elongation factor EF1B%2C beta and delta chains%2C guanine nucleotide exchange
Solyc02g083500	1.79036	8.32747e-18	1.19976e-16	Genomic DNA chromosome 5 TAC clone K2A18 (AHRD V1 ***- Q9FKX3_ARATH)%3B contains Interpro domain(s) IPR006016 UspA
Solyc03g007550	1.78877	3.24773e-05	9.67724e-05	Unknown Protein (AHRD V1)
Solyc01g103800	1.78842	5.19599e-26	1.69474e-24	40S ribosomal protein S12 (AHRD V1 ***- A9P9K3_POPTR)%3B contains Interpro domain(s) IPR000530 Ribosomal protein S12e
Solyc02g090230	1.7883	2.98953e-23	7.21907e-22	Nucleoporin p58/p45 (AHRD V1 ***- B4FHB0_MAIZE)
Solyc03g046350	1.78773	2.3359e-22	5.1873e-21	Ribosomal RNA-processing protein 7 homolog A (AHRD V1 *-*- RRP7A_HUMAN)
Solyc04g077290	1.78757	3.49603e-11	2.41027e-10	YEATS domain-containing protein (AHRD V1 **-- C1EEG0_9CHLO)%3B contains Interpro domain(s) IPR005033 YEATS
Solyc07g008590	1.78701	6.25674e-09	3.23638e-08	LRR receptor-like serine/threonine-protein kinase%2C RLP
Solyc06g009420	1.78682	2.14241e-14	2.16511e-13	Unknown Protein (AHRD V1)
Solyc01g090240	1.7862	1.84035e-08	8.9618e-08	Protein kinase 5 (AHRD V1 ***- Q8W4K8_ARATH)%3B contains Interpro domain(s) IPR002290 Serine/threonine protein kinase
Solyc02g078160	1.78529	1.80159e-05	5.58708e-05	Plant-specific domain TIGR01615 family protein (AHRD V1 ***- B6UDN7_MAIZE)%3B contains Interpro domain(s) IPR006502 Protein of unknown function DUF506%2C plant
Solyc02g082260	1.78512	1.32699e-19	2.26844e-18	Hydroxy-methylglutaryl-coenzyme A reductase (AHRD V1 **** O48624_TOBAC)%3B contains Interpro domain(s) IPR004554 Hydroxymethylglutaryl-CoA reductase%2C class I%2C catalytic
Solyc05g007130	1.78437	7.74723e-13	6.50054e-12	Calmodulin binding protein (AHRD V1 **-* B6T984_MAIZE)%3B contains Interpro domain(s) IPR000048 IQ calmodulin-binding region
Solyc01g096430	1.78388	5.15936e-11	3.47914e-10	Predicted NADPH-dependent FMN reductase (AHRD V1 ***- Q0W0S0_UNCMA)%3B contains Interpro domain(s) IPR005025 NADPH-dependent FMN reductase
Solyc05g050980	1.78363	2.36889e-08	1.14032e-07	3-phosphoshikimate 1-carboxyvinyltransferase (AHRD V1 **** Q30CZ8_FAGSY)%3B contains Interpro domain(s) IPR001986 3-phosphoshikimate 1-carboxyvinyltransferase%2C core
Solyc09g010450	1.78326	6.32145e-15	6.74778e-14	Pentatricopeptide repeat-containing protein (AHRD V1 ***- D7KS33_ARALY)%3B contains Interpro domain(s) IPR002885 Pentatricopeptide repeat
Solyc02g030130	1.78316	9.04758e-05	0.000249819	Subtilisin-like serine protease (AHRD V1 **-* Q948Q4_ARATH)%3B contains Interpro domain(s) IPR015500 Peptidase S8%2C subtilisin-related
Solyc01g106240	1.78248	0.000775047	0.0017921	DNA polymerase V (AHRD V1 ***- A2Q1A6_MEDTR)%3B contains Interpro domain(s) IPR007015 DNA polymerase V
Solyc06g059730	1.78135	0.000601906	0.00142329	Auxin efflux carrier (AHRD V1 **** Q71T12_MOMCH)%3B contains Interpro domain(s) IPR014024 Auxin efflux carrier%2C subgroup
Solyc02g063430	1.78079	6.678e-08	3.01876e-07	BHLH transcription factor (AHRD V1 **** A9YWR2_MEDTR)%3B contains Interpro domain(s) IPR011598 Helix-loop-helix DNA-binding
Solyc03g031940	1.77995	0.00400919	0.00801198	Acyl-CoA synthetase/AMP-acid ligase II (AHRD V1 **** D0C359_9GAMM)%3B contains Interpro domain(s) IPR000873 AMP-dependent synthetase and ligase
Solyc11g062250	1.77943	1.94775e-05	6.01451e-05	Pentatricopeptide repeat-containing protein (AHRD V1 ***- D7LE02_ARALY)%3B contains Interpro domain(s) IPR002885 Pentatricopeptide repeat
Solyc02g069850	1.77924	1.75445e-25	5.37696e-24	40S ribosomal protein S25-1 (AHRD V1 ***- B4FG22_MAIZE)%3B contains Interpro domain(s) IPR004977 Ribosomal protein S25
Solyc01g006210	1.77906	8.59178e-06	2.80281e-05	Non-structural maintenance of chromosomes element 1 homolog (AHRD V1 ***- B5X8H0_SALSA)%3B contains Interpro domain(s) IPR011513 Nse1 non-SMC component of SMC5-6 complex
Solyc04g009940	1.77834	8.708e-21	1.66426e-19	Heat shock protein binding protein (AHRD V1 **-- D7KIU0_ARALY)
Solyc02g081840	1.77738	1.17213e-13	1.08477e-12	MMP37-like protein mitochondrial (AHRD V1 ***- C1C198_9MAXI)%3B contains Interpro domain(s) IPR015222 Mitochondrial matrix Mmp37
Solyc02g088780	1.77718	1.43086e-20	2.66682e-19	Ribosome biogenesis protein ytm1 (AHRD V1 **-- C8V8H1_EMENI)%3B contains Interpro domain(s) IPR020472 G-protein beta WD-40 repeat%2C region
Solyc04g080660	1.77676	1.17581e-07	5.12528e-07	Carboxyl methyltransferase 4 (AHRD V1 **** B0ZB58_HUMLU)%3B contains Interpro domain(s) IPR005299 SAM dependent carboxyl methyltransferase
Solyc11g066630	1.77596	1.15388e-20	2.17214e-19	MKI67 FHA domain-interacting nucleolar phosphoprotein-like (AHRD V1 **-- B4FL92_MAIZE)%3B contains Interpro domain(s) IPR012677 Nucleotide-binding%2C alpha-beta plait
Solyc04g072270	1.77581	0.00600599	0.0115008	Midasin (AHRD V1 ***- B9S5U3_RICCO)
Solyc06g067950	1.7752	2.77901e-14	2.76678e-13	Acyl-protein thioesterase 2 (AHRD V1 **-- B6T1C9_MAIZE)%3B contains Interpro domain(s) IPR003140 Phospholipase/carboxylesterase
Solyc04g013200	1.77496	0.0139474	0.0246523	Unknown Protein (AHRD V1)
Solyc05g007840	1.77327	9.87728e-10	5.67996e-09	Mitochondrial transcription termination factor (Fragment) (AHRD V1 *--- C6FB10_PSEMZ)%3B contains Interpro domain(s) IPR003690 Mitochodrial transcription termination factor-related
Solyc03g033360	1.77326	5.94889e-05	0.000169696	Aspartic proteinase nepenthesin II-like (AHRD V1 **-- Q651C2_ORYSJ)%3B contains Interpro domain(s) IPR001461 Peptidase A1
Solyc01g009670	1.77302	1.22991e-18	1.92233e-17	CCA-adding enzyme (AHRD V1 *-*- CCA_STAES)%3B contains Interpro domain(s) IPR002646 Polynucleotide adenylyltransferase region
Solyc05g007490	1.77172	3.03421e-14	2.99704e-13	Dehydration-responsive family protein (AHRD V1 ***- D7KPN7_ARALY)%3B contains Interpro domain(s) IPR004159 Protein of unknown function DUF248%2C methyltransferase putative
Solyc10g085630	1.77138	3.12449e-15	3.44887e-14	Fatty acid oxidation complex subunit alpha (AHRD V1 *-*- FADB_PHOLL)%3B contains Interpro domain(s) IPR001753 Crotonase%2C core
Solyc03g006080	1.77046	5.20927e-12	3.95741e-11	Receptor like kinase%2C RLK
Solyc08g066520	1.77028	3.93776e-14	3.84305e-13	Unknown Protein (AHRD V1)
Solyc10g054850	1.77024	1.82031e-05	5.64325e-05	ER lumen protein retaining receptor family protein (AHRD V1 ***- D7LL09_ARALY)%3B contains Interpro domain(s) IPR000133 ER lumen protein retaining receptor
Solyc01g096290	1.77009	3.63064e-26	1.2051e-24	Ubiquitin (AHRD V1 ***- C0SFI2_PARBP)%3B contains Interpro domain(s) IPR019956 Ubiquitin subgroup
Solyc01g099160	1.77002	1.78504e-08	8.71507e-08	Lipoxygenase (AHRD V1 **** Q9FT17_SOLLC)%3B contains Interpro domain(s) IPR001246 Lipoxygenase%2C plant
Solyc10g081430	1.76844	0.000288067	0.000726822	Exostosin family protein (AHRD V1 **-- D7LML7_ARALY)%3B contains Interpro domain(s) IPR004263 Exostosin-like
Solyc04g071650	1.76729	6.79261e-11	4.50769e-10	Cellulose synthase (AHRD V1 **** B9GTH4_POPTR)%3B contains Interpro domain(s) IPR005150 Cellulose synthase
Solyc05g056310	1.76707	9.89626e-22	2.05211e-20	T-complex protein 1 subunit gamma (AHRD V1 ***- B6UCD0_MAIZE)%3B contains Interpro domain(s) IPR012719 T-complex protein 1%2C gamma subunit
Solyc01g087670	1.76625	8.39991e-18	1.20927e-16	Guanine nucleotide-binding protein G(I)/G(S)/G(T) subunit beta-1 (AHRD V1 *--* GBB1_DANRE)%3B contains Interpro domain(s) IPR007319 Small-subunit processome%2C Utp21
Solyc02g088790	1.76548	4.1222e-20	7.36157e-19	RNA-binding protein (AHRD V1 *-** Q941H8_SOLTU)%3B contains Interpro domain(s) IPR015465 RNA recognition motif%2C glycine rich protein
Solyc04g071890	1.76537	1.75281e-06	6.40287e-06	Peroxidase 4 (AHRD V1 **** B7UCP4_LITCN)%3B contains Interpro domain(s) IPR002016 Haem peroxidase%2C plant/fungal/bacterial
Solyc07g066410	1.76367	6.98201e-17	9.17921e-16	WD repeat protein (AHRD V1 ***- B6QUX1_PENMQ)%3B contains Interpro domain(s) IPR017986 WD40 repeat%2C region
Solyc08g008670	1.76248	9.99707e-14	9.34868e-13	Phosphomannomutase 1
Solyc03g123680	1.76245	0.00170298	0.00367449	Ring H2 finger protein (AHRD V1 *-*- D9ZHD8_HYPPE)%3B contains Interpro domain(s) IPR018957 Zinc finger%2C C3HC4 RING-type
Solyc06g008160	1.7623	1.33166e-19	2.27435e-18	Chloroplast FLU-like protein (Fragment) (AHRD V1 *--- D2K2R8_PICAB)%3B contains Interpro domain(s) IPR011990 Tetratricopeptide-like helical
Solyc06g065590	1.76223	1.70329e-26	5.80757e-25	60S ribosomal protein L18a (AHRD V1 ***- D2D962_9ROSI)%3B contains Interpro domain(s) IPR002670 Ribosomal protein L18ae
Solyc12g036390	1.76099	0.0034293	0.00695748	Calmodulin-binding protein-like (AHRD V1 ***- Q943R3_ORYSJ)%3B contains Interpro domain(s) IPR012416 Calmodulin binding protein-like
Solyc01g007250	1.76093	3.96912e-17	5.3339e-16	U3 small nucleolar ribonucleoprotein protein IMP4 (AHRD V1 ***- D0N3A6_PHYIN)%3B contains Interpro domain(s) IPR007109 Brix domain
Solyc12g056360	1.76092	0.000186691	0.000486931	Thaumatin-like protein (AHRD V1 **-- Q93XD4_SAMNI)%3B contains Interpro domain(s) IPR001938 Thaumatin%2C pathogenesis-related
Solyc01g104370	1.76067	2.90372e-14	2.87723e-13	60S acidic ribosomal protein P1 (AHRD V1 ***- B6T3C1_MAIZE)%3B contains Interpro domain(s) IPR001813 Ribosomal protein 60S
Solyc06g069860	1.76039	1.16199e-25	3.65059e-24	60S ribosomal protein L34 (AHRD V1 ***- B6UH15_MAIZE)%3B contains Interpro domain(s) IPR008195 Ribosomal protein L34e
Solyc09g007260	1.7601	5.63059e-07	2.23074e-06	AP2-like ethylene-responsive transcription factor At1g79700 (AHRD V1 *--- AP2L3_ARATH)%3B contains Interpro domain(s) IPR001471 Pathogenesis-related transcriptional factor and ERF%2C DNA-binding
Solyc06g069000	1.75789	0.000189031	0.000492693	Uncharacterized GPI-anchored protein At4g28100 (AHRD V1 ***- UGPI7_ARATH)
Solyc06g062500	1.75742	5.53123e-20	9.72989e-19	60S ribosomal protein L28 (AHRD V1 ***- B3TLS3_ELAGV)%3B contains Interpro domain(s) IPR002672 Ribosomal protein L28e
Solyc08g062610	1.75732	2.91578e-24	7.85923e-23	Cyclopropane-fatty-acyl-phospholipid synthase (AHRD V1 ***- A9ASG7_BURM1)%3B contains Interpro domain(s) IPR003333 Cyclopropane-fatty-acyl-phospholipid synthase
Solyc11g008780	1.75678	2.17762e-15	2.44976e-14	Acetolactate synthase small subunit (AHRD V1 ***- Q9SMC2_NICPL)%3B contains Interpro domain(s) IPR004789 Acetolactate synthase%2C small subunit
Solyc08g036600	1.75675	6.76485e-09	3.48673e-08	Cytochrome cd1-nitrite reductase-like C-terminal haem d1 (AHRD V1 **-- Q2HUV6_MEDTR)%3B contains Interpro domain(s) IPR011046 WD40 repeat-like
Solyc03g111850	1.75663	2.53402e-22	5.61399e-21	Indole-3-glycerol phosphate synthase-like (AHRD V1 **** C8TFG9_ORYSI)%3B contains Interpro domain(s) IPR013798 Indole-3-glycerol phosphate synthase
Solyc08g067180	1.75641	5.01103e-06	1.70116e-05	Zinc finger (Ran-binding) family protein (AHRD V1 *-*- D7L4W6_ARALY)%3B contains Interpro domain(s) IPR001876 Zinc finger%2C RanBP2-type
Solyc09g008800	1.75636	8.3049e-26	2.67165e-24	60S ribosomal protein L24 (AHRD V1 ***- B3TM46_ELAGV)%3B contains Interpro domain(s) IPR000988 Ribosomal protein L24e
Solyc07g044930	1.75631	3.38652e-18	5.08168e-17	ATP-dependent RNA helicase A (AHRD V1 ***- B0W816_CULQU)%3B contains Interpro domain(s) IPR011545 DNA/RNA helicase%2C DEAD/DEAH box type%2C N-terminal
Solyc03g116540	1.75602	0.000347134	0.000861098	Pentatricopeptide repeat-containing protein (AHRD V1 ***- D7KJJ1_ARALY)%3B contains Interpro domain(s) IPR002885 Pentatricopeptide repeat
Solyc02g080960	1.75515	8.87471e-05	0.00024537	TO62-3 (Fragment) (AHRD V1 ***- Q3LVL2_TAROF)%3B contains Interpro domain(s) IPR010471 Protein of unknown function DUF1068
Solyc01g088490	1.75459	0.000145472	0.000387658	Pentatricopeptide repeat-containing protein (AHRD V1 ***- D7KG17_ARALY)%3B contains Interpro domain(s) IPR002885 Pentatricopeptide repeat
Solyc02g081160	1.7542	1.09234e-24	3.07212e-23	Diphosphate-fructose-6-phosphate 1-phosphotransferase (AHRD V1 ***- D1JTA2_9BACE)%3B contains Interpro domain(s) IPR011183 Pyrophosphate-dependent phosphofructokinase PfpB
Solyc12g009240	1.75397	0.000831078	0.00190874	Ethylene-responsive transcription factor 4 (AHRD V1 *-*- ERF78_ARATH)%3B contains Interpro domain(s) IPR001471 Pathogenesis-related transcriptional factor and ERF%2C DNA-binding
Solyc01g096590	1.75378	4.25e-23	1.00941e-21	30S ribosomal protein S10 (AHRD V1 ***- RS10_CAMFF)%3B contains Interpro domain(s) IPR005729 Ribosomal protein S10%2C eukaryotic/archaeal
Solyc08g008230	1.75355	1.30437e-10	8.3922e-10	Arabinogalactan peptide 22 (AHRD V1 ***- AGP22_ARATH)%3B contains Interpro domain(s) IPR009424 Protein of unknown function DUF1070
Solyc11g011180	1.75353	1.35287e-05	4.27381e-05	LRR receptor-like serine/threonine-protein kinase%2C RLP
Solyc04g081300	1.75346	9.75838e-18	1.39627e-16	Endoglucanase 1 (AHRD V1 ***- B6U0J0_MAIZE)%3B contains Interpro domain(s) IPR001701 Glycoside hydrolase%2C family 9
Solyc06g069530	1.75346	3.604e-16	4.39664e-15	Acetyl-CoA carboxylase biotin carboxyl carrier protein (AHRD V1 *-** Q7NZD6_CHRVO)%3B contains Interpro domain(s) IPR001249 Acetyl-CoA biotin carboxyl carrier
Solyc01g105630	1.75278	0.0181392	0.0312213	Calmodulin (AHRD V1 ***- Q39890_SOYBN)%3B contains Interpro domain(s) IPR011992 EF-Hand type
Solyc11g069890	1.75126	8.333e-06	2.72454e-05	BEL1-like homeodomain protein 8 (AHRD V1 *--- BLH8_ARATH)%3B contains Interpro domain(s) IPR006563 POX
Solyc03g077910	1.75014	1.80951e-09	1.00727e-08	Beta-1%2C3-galactosyl-O-glycosyl-glycoprotein beta-1%2C6-N-acetylglucosaminyltransferase 7 (AHRD V1 *--* GCNT7_HUMAN)%3B contains Interpro domain(s) IPR003406 Glycosyl transferase%2C family 14
Solyc04g050540	1.74973	1.59962e-25	4.95093e-24	Pentatricopeptide repeat protein (AHRD V1 *-*- Q1G1I8_MAIZE)%3B contains Interpro domain(s) IPR003034 DNA-binding SAP
Solyc06g051200	1.74892	2.53733e-25	7.627e-24	50S ribosomal protein L3 (AHRD V1 ***- D7LJX0_ARALY)%3B contains Interpro domain(s) IPR019927 Ribosomal protein L3%2C bacterial/organelle-type
Solyc01g096480	1.74779	1.74987e-22	3.92301e-21	Thioredoxin protein (AHRD V1 ***- Q6JE37_NICBE)%3B contains Interpro domain(s) IPR013766 Thioredoxin domain
Solyc07g054150	1.74757	0.000507011	0.00121915	Unknown Protein (AHRD V1)
Solyc06g007580	1.74705	0.000562283	0.00133937	Plant-specific domain TIGR01615 family protein (AHRD V1 *-*- B6SS18_MAIZE)%3B contains Interpro domain(s) IPR006502 Protein of unknown function DUF506%2C plant
Solyc07g042570	1.74703	7.9673e-21	1.53362e-19	Eukaryotic translation initiation factor 3 subunit 11 family protein expressed (AHRD V1 ***- Q10QU7_ORYSJ)%3B contains Interpro domain(s) IPR009374 Translation initiation factor 3%2C subunit 12%2C eukaryotic
Solyc01g100020	1.74501	1.69476e-12	1.36124e-11	Phospholipase D (AHRD V1 **** A3KH17_ARATH)%3B contains Interpro domain(s) IPR016555 Phospholipase D%2C eukaryota
Solyc02g092840	1.74487	1.74926e-15	1.9881e-14	Galactosyltransferase-like protein (Fragment) (AHRD V1 **-- D8RHX9_SELML)%3B contains Interpro domain(s) IPR004263 Exostosin-like
Solyc07g066380	1.74444	4.88629e-24	1.29294e-22	Unknown Protein (AHRD V1)%3B contains Interpro domain(s) IPR007836 Ribosomal protein L41
Solyc11g007980	1.74425	0.000195372	0.000508231	Cytochrome P450
Solyc08g080850	1.74396	1.78671e-23	4.47559e-22	Serine/threonine-protein kinase RIO1 (AHRD V1 **** Q75XU7_TOBAC)%3B contains Interpro domain(s) IPR017407 Serine/threonine-protein kinase Rio1
Solyc01g009520	1.74388	1.3248e-23	3.35884e-22	Ribosomal protein (AHRD V1 ***- Q6ER67_ORYSJ)%3B contains Interpro domain(s) IPR002143 Ribosomal protein L1
Solyc08g076340	1.74348	1.16204e-23	2.97835e-22	40S ribosomal protein S30-like (AHRD V1 ***- Q6K853_ORYSJ)%3B contains Interpro domain(s) IPR006846 Ribosomal protein S30
Solyc02g079520	1.74322	0.00047855	0.00115768	Calcium-binding EF hand family protein (Fragment) (AHRD V1 **-* D7MEH5_ARALY)%3B contains Interpro domain(s) IPR011992 EF-Hand type
Solyc10g007980	1.74062	7.0224e-26	2.26684e-24	50S ribosomal protein L5 (AHRD V1 ***- RL5_XANP2)%3B contains Interpro domain(s) IPR002132 Ribosomal protein L5
Solyc04g081200	1.74026	2.26921e-20	4.14704e-19	Regulator of chromosome condensation (RCC1)-like protein (AHRD V1 **-- D0NEM9_PHYIN)%3B contains Interpro domain(s) IPR009091 Regulator of chromosome condensation/beta-lactamase-inhibitor protein II
Solyc01g103740	1.73997	2.72498e-16	3.36361e-15	Ribosome biogenesis protein ERB1 (AHRD V1 ***- ERB1_CRYNE)%3B contains Interpro domain(s) IPR012953 BOP1%2C N-terminal
Solyc06g074900	1.73948	1.04939e-13	9.7744e-13	Trigger factor (AHRD V1 *-*- B7KBH9_CYAP7)%3B contains Interpro domain(s) IPR008881 Trigger factor%2C ribosome-binding%2C bacterial
Solyc12g042580	1.73636	0.00307344	0.00629875	Blue copper-like protein (AHRD V1 *-*- B8Y8A0_GOSHI)%3B contains Interpro domain(s) IPR003245 Plastocyanin-like
Solyc01g090180	1.73604	0.00219735	0.00462902	Extradiol ring-cleavage dioxygenase class III protein subunit B (AHRD V1 ***- B8GF38_METPE)%3B contains Interpro domain(s) IPR014436 Extradiol aromatic ring-opening dioxygenase%2C DODA type
Solyc08g065190	1.73546	5.09396e-10	3.02657e-09	Zinc transporter protein (AHRD V1 **** D5LMF9_9FABA)%3B contains Interpro domain(s) IPR004698 Zinc/iron permease%2C fungal and plant
Solyc03g044330	1.73538	7.71383e-21	1.48788e-19	Acetolactate synthase (AHRD V1 **** D7RPJ7_SOLTU)%3B contains Interpro domain(s) IPR012846 Acetolactate synthase%2C large subunit%2C biosynthetic
Solyc10g038080	1.73474	1.3248e-10	8.51196e-10	Shikimate dehydrogenase (AHRD V1 ***- B6TSW1_MAIZE)%3B contains Interpro domain(s) IPR001381 Dehydroquinase class I
Solyc01g102270	1.73473	1.49071e-14	1.52622e-13	Anaphase promoting complex subunit 11 (AHRD V1 ***- D7MN37_ARALY)
Solyc02g071710	1.73453	9.36363e-08	4.14014e-07	GDSL esterase/lipase At1g29670 (AHRD V1 ***- GDL15_ARATH)%3B contains Interpro domain(s) IPR001087 Lipase%2C GDSL
Solyc02g088170	1.73376	8.05818e-08	3.5985e-07	Pentatricopeptide repeat-containing protein (AHRD V1 ***- D7M7B4_ARALY)%3B contains Interpro domain(s) IPR002885 Pentatricopeptide repeat
Solyc04g007690	1.73343	6.19549e-09	3.20912e-08	Auxin efflux carrier (AHRD V1 **** D6RT11_SOLLC)%3B contains Interpro domain(s) IPR014024 Auxin efflux carrier%2C subgroup
Solyc01g091360	1.73292	8.19724e-05	0.000228218	Homology to unknown gene (AHRD V1 ***- Q00VP3_OSTTA)%3B contains Interpro domain(s) IPR010865 Protein of unknown function DUF1499
Solyc09g008280	1.73287	9.0242e-17	1.17165e-15	S-adenosylmethionine synthase (AHRD V1 ***- B5LAW6_CAPAN)%3B contains Interpro domain(s) IPR002133 S-adenosylmethionine synthetase
Solyc10g081370	1.73277	1.32399e-22	3.02234e-21	Small nuclear ribonucleoprotein F (AHRD V1 **-- B6TPP2_MAIZE)%3B contains Interpro domain(s) IPR016487 Small nuclear ribonucleoprotein SmF
Solyc09g008670	1.73246	0.00981918	0.0179414	Threonine ammonia-lyase biosynthetic (AHRD V1 **** B1XNT1_SYNP2)%3B contains Interpro domain(s) IPR000634 Serine/threonine dehydratase%2C pyridoxal-phosphate-binding site IPR005787 Threonine dehydratase I
Solyc05g010790	1.73147	0.000176942	0.000463693	Unknown Protein (AHRD V1)
Solyc12g019290	1.73031	2.80002e-22	6.16693e-21	Pentatricopeptide repeat-containing protein (AHRD V1 ***- D7LJQ6_ARALY)%3B contains Interpro domain(s) IPR002885 Pentatricopeptide repeat
Solyc02g079730	1.73011	2.51564e-18	3.82993e-17	Thioredoxin family protein (AHRD V1 ***- B6TC88_MAIZE)
Solyc06g007360	1.72996	1.39568e-18	2.17238e-17	40S ribosomal protein S4-like protein (AHRD V1 ***- Q2XPX5_SOLTU)%3B contains Interpro domain(s) IPR000876 Ribosomal protein S4e
Solyc02g085690	1.72993	5.97388e-05	0.000170357	Ubiquitin-conjugating enzyme E2 4 (AHRD V1 ***- UBC4_SCHPO)%3B contains Interpro domain(s) IPR015580 RUB1 conjugating enzyme Ubc12
Solyc02g070810	1.72993	3.77537e-15	4.12851e-14	Nuclear pore membrane glycoprotein 210 (AHRD V1 ***- PO210_HUMAN)%3B contains Interpro domain(s) IPR008964 Invasin/intimin cell-adhesion
Solyc01g109590	1.72934	5.41831e-08	2.48581e-07	Receptor-like protein kinase (AHRD V1 ***- Q9LYS5_ARATH)%3B contains Interpro domain(s) IPR002290 Serine/threonine protein kinase
Solyc03g121870	1.72776	2.70059e-07	1.12074e-06	Methyltransferase-like protein (AHRD V1 ***- B6K6V3_SCHJY)%3B contains Interpro domain(s) IPR013217 Methyltransferase type 12
Solyc05g012790	1.72657	3.07108e-13	2.69777e-12	Palmitoyltransferase erf2 (AHRD V1 *-*- C5FZI1_NANOT)%3B contains Interpro domain(s) IPR001594 Zinc finger%2C DHHC-type
Solyc11g065830	1.72503	2.45581e-12	1.93773e-11	2-oxoglutarate/malate translocator-like protein (AHRD V1 **-- Q9LXV3_ARATH)%3B contains Interpro domain(s) IPR001898 Sodium/sulphate symporter
Solyc12g045030	1.72472	5.12769e-20	9.03695e-19	Short-chain dehydrogenase/reductase family protein (AHRD V1 **-- D7LV30_ARALY)%3B contains Interpro domain(s) IPR002347 Glucose/ribitol dehydrogenase
Solyc02g093770	1.72467	3.07874e-16	3.78041e-15	GPI inositol-deacylase (AHRD V1 *-*- C5FP83_NANOT)%3B contains Interpro domain(s) IPR012908 PGAP1-like
Solyc03g033720	1.72456	4.41128e-12	3.37851e-11	Genomic DNA chromosome 3 P1 clone MDJ14 (AHRD V1 ***- Q9LW36_ARATH)
Solyc06g007710	1.72447	7.6267e-23	1.77111e-21	Mitochondrial import receptor subunit TOM40 (AHRD V1 ***- B6TEP3_MAIZE)%3B contains Interpro domain(s) IPR001925 Porin%2C eukaryotic type
Solyc08g076960	1.72142	1.98895e-08	9.64292e-08	Abscisic acid receptor PYR1 (AHRD V1 **-- PYR1_ARATH)%3B contains Interpro domain(s) IPR019587 Polyketide cyclase/dehydrase
Solyc10g086330	1.72128	1.45759e-22	3.30721e-21	60S ribosomal protein L23a (AHRD V1 ***- B6TN30_MAIZE)%3B contains Interpro domain(s) IPR019985 Ribosomal protein L23
Solyc02g030480	1.72021	8.36668e-09	4.26553e-08	Cinnamyl alcohol dehydrogenase-like protein (AHRD V1 **** A9PHZ1_POPTR)%3B contains Interpro domain(s) IPR002085 Alcohol dehydrogenase superfamily%2C zinc-containing
Solyc12g010950	1.71951	0.00233213	0.00488939	Alcohol dehydrogenase zinc-containing (AHRD V1 **-- Q9A6R7_CAUCR)%3B contains Interpro domain(s) IPR002085 Alcohol dehydrogenase superfamily%2C zinc-containing
Solyc07g005810	1.71875	4.3368e-22	9.35425e-21	Eukaryotic translation initiation factor 4 (AHRD V1 *-*- D8TN78_VOLCA)%3B contains Interpro domain(s) IPR016021 MIF4-like%2C type 1/2/3
Solyc04g007150	1.71859	0.00518816	0.0100775	Alpha-glucosidase (AHRD V1 **** Q9LEC9_SOLTU)%3B contains Interpro domain(s) IPR000322 Glycoside hydrolase%2C family 31
Solyc07g064930	1.71818	6.13679e-22	1.30126e-20	Protein grpE (AHRD V1 *-*- Q1QRU3_NITHX)%3B contains Interpro domain(s) IPR000740 GrpE nucleotide exchange factor
Solyc05g007430	1.71814	3.99413e-06	1.37988e-05
Solyc09g010100	1.71721	1.49241e-22	3.38213e-21	30S ribosomal protein S11 (AHRD V1 ***- RS11_CAUSK)%3B contains Interpro domain(s) IPR018102 Ribosomal S11%2C conserved site
Solyc04g080490	1.71714	1.73484e-06	6.3397e-06	Zinc finger-homeodomain protein 1 (Fragment) (AHRD V1 *--- B0LK17_YUCFI)%3B contains Interpro domain(s) IPR006456 ZF-HD homeobox protein Cys/His-rich dimerisation region
Solyc03g034360	1.71641	0.000701637	0.00163727	Unknown Protein (AHRD V1)
Solyc09g007060	1.71637	4.45309e-05	0.000129806	RING finger protein 44 (AHRD V1 *--- RNF44_RAT)%3B contains Interpro domain(s) IPR018957 Zinc finger%2C C3HC4 RING-type
Solyc09g005720	1.71556	6.03276e-22	1.28065e-20	60S ribosomal protein L23a (AHRD V1 ***- B6TN30_MAIZE)%3B contains Interpro domain(s) IPR001014 Ribosomal protein L23/L25%2C conserved site
Solyc11g012040	1.71525	1.55558e-07	6.67536e-07	Cysteine-type endopeptidase/ ubiquitin thiolesterase (AHRD V1 **-- B6TDL6_MAIZE)
Solyc07g008370	1.71524	1.35655e-24	3.78122e-23	60S ribosomal protein L7 (AHRD V1 ***- D7MY49_ARALY)%3B contains Interpro domain(s) IPR005998 Ribosomal protein L7%2C eukaryotic
Solyc06g074820	1.71518	3.34597e-20	6.02115e-19	Aquaporin-like protein (AHRD V1 ***- D1M6Z5_CAPAN)%3B contains Interpro domain(s) IPR012269 Aquaporin
Solyc01g103590	1.71388	2.07547e-06	7.50709e-06	Glyoxalase/bleomycin resistance protein/dioxygenase (AHRD V1 **-- Q2HVV5_MEDTR)%3B contains Interpro domain(s) IPR004360 Glyoxalase/bleomycin resistance protein/dioxygenase
Solyc12g037930	1.71373	6.87235e-06	2.28636e-05	Unknown Protein (AHRD V1)
Solyc07g055050	1.71286	1.90057e-17	2.63318e-16	ATP synthase I-like protein (AHRD V1 **-- A8HNA8_CHLRE)%3B contains Interpro domain(s) IPR008413 ATPase%2C F0 complex%2C subunit I%2C bacillus-type
Solyc09g005430	1.71271	0.00156539	0.00340461	Unknown Protein (AHRD V1)
Solyc03g098780	1.71258	0.000806963	0.0018588	Kunitz-type protease inhibitor (AHRD V1 **** Q3S488_SOLTU)%3B contains Interpro domain(s) IPR002160 Proteinase inhibitor I3%2C Kunitz legume
Solyc07g014640	1.71218	1.51677e-12	1.22562e-11	Galactokinase-like protein (AHRD V1 ***- Q9SG76_ARATH)%3B contains Interpro domain(s) IPR000705 Galactokinase
Solyc08g068290	1.71156	6.15234e-11	4.11185e-10
Solyc09g007330	1.71121	9.33287e-06	3.03141e-05	DNA replication licensing factor MCM6 (AHRD V1 **** B3LHP9_YEAS1)%3B contains Interpro domain(s) IPR001208 DNA-dependent ATPase MCM
Solyc01g066910	1.71092	0.00467399	0.00918422	PVR3-like protein (AHRD V1 ***- B6TYX6_MAIZE)%3B contains Interpro domain(s) IPR003612 Plant lipid transfer protein/seed storage/trypsin-alpha amylase inhibitor
Solyc11g006030	1.71085	0.000207901	0.000538885	U-box domain-containing protein (AHRD V1 ***- D7MID4_ARALY)%3B contains Interpro domain(s) IPR003613 U box domain
[truncated: 3,924 more rows]

## Sheet: Dataset S2
Dataset S2. Down-regulated genes in the comparison Ti vs Tni. Gene name = Solanum lycopersicum reference gene id, logFC = Fold change logged on base 2, p-Value = p-value of differential expression, FDR = adjusted p-value (FDR), description = gene functional annotation.
Gene Name	logFC	p-Value	FDR	description
Solyc03g025810	-11.8145	9.47126e-08	4.18674e-07	Low-temperature-induced 65 kDa protein (AHRD V1 *--- LTI65_ARATH)%3B contains Interpro domain(s) IPR012418 CAP160
Solyc01g057000	-11.7777	1.15222e-08	5.77402e-08	Universal stress protein family protein (AHRD V1 ***- D7LAT3_ARALY)%3B contains Interpro domain(s) IPR006016 UspA
Solyc10g078770	-9.2086	2.25876e-06	8.11538e-06	Seed maturation protein LEA 4 (AHRD V1 ***- Q9FE69_GLYTO)%3B contains Interpro domain(s) IPR005513 Late embryogenesis abundant (LEA) group 1
Solyc01g007730	-8.81176	4.28591e-05	0.000125341	ORF91 (AHRD V1 *--- C1BRN8_9MAXI)
Solyc12g038430	-8.63894	0.000517622	0.00124276	Kinesin-like calmodulin binding protein (AHRD V1 *-*- Q9FQL7_MAIZE)
Solyc04g016550	-8.57516	0.000525947	0.00126065	Folylpolyglutamate synthase (AHRD V1 **** B9IHV7_POPTR)%3B contains Interpro domain(s) IPR001645 Folylpolyglutamate synthetase
Solyc04g018080	-8.36493	0.000554521	0.00132289	Unknown Protein (AHRD V1)
Solyc03g116390	-8.36445	3.25594e-12	2.53394e-11	Late embryogenesis abundant protein (AHRD V1 ***- Q2QKE8_CATRO)
Solyc03g065260	-8.30303	9.77963e-07	3.72451e-06	Unknown Protein (AHRD V1)
Solyc07g041620	-7.97797	0.000611772	0.00144425	Unknown Protein (AHRD V1)
Solyc02g093180	-7.80663	0.00198323	0.0042172	N-hydroxycinnamoyl/benzoyltransferase 3 (AHRD V1 **-- Q00M87_SOYBN)%3B contains Interpro domain(s) IPR003480 Transferase
Solyc11g042860	-7.64702	0.000658814	0.0015456	Unknown Protein (AHRD V1)
Solyc12g013750	-7.61569	0.000663214	0.00155475	Mannan endo-1%2C4-beta-mannosidase 3 (AHRD V1 ***- MAN3_SOLLC)%3B contains Interpro domain(s) IPR013781 Glycoside hydrolase%2C subgroup%2C catalytic core
Solyc04g050020	-7.58367	0.000667734	0.00156418	Unknown Protein (AHRD V1)
Solyc08g074910	-7.412	0.000692353	0.00161701	Unknown Protein (AHRD V1)
Solyc11g020190	-7.412	0.000692353	0.00161701	Genomic DNA chromosome 5 P1 clone MJJ3 (AHRD V1 ***- Q9FFK6_ARATH)
Solyc12g017250	-7.3905	5.45513e-05	0.000156778	photosystem II polypeptide (AHRD V1 ***- Q6V7X5_TRIPR)%3B contains Interpro domain(s) IPR006814 Photosystem II protein PsbR
Solyc01g050040	-7.33719	0.000703281	0.0016405	RING finger protein 13 (AHRD V1 *-*- RNF13_CHICK)%3B contains Interpro domain(s) IPR018957 Zinc finger%2C C3HC4 RING-type
Solyc06g074680	-7.22753	3.12709e-07	1.28637e-06	Phospholipid diacylglycerol acyltransferase (AHRD V1 **** B3LPN2_YEAS1)%3B contains Interpro domain(s) IPR003386 Lecithin:cholesterol acyltransferase
Solyc10g081560	-7.13673	0.000159035	0.000420935	Tropinone reductase I (AHRD V1 **-- Q9AR59_SOLTU)%3B contains Interpro domain(s) IPR002347 Glucose/ribitol dehydrogenase
Solyc04g072250	-6.99536	1.94165e-05	5.99765e-05	class I heat shock protein 1 (AHRD V1 ***- B6TTC8_MAIZE)%3B contains Interpro domain(s) IPR002068 Heat shock protein Hsp20
Solyc07g026620	-6.99212	0.000755388	0.00175182	Unknown Protein (AHRD V1)
Solyc07g009440	-6.89131	0.000771233	0.0017846	S-locus glycoprotein (Fragment) (AHRD V1 ***- Q84KU9_BRAOL)%3B contains Interpro domain(s) IPR001480 Curculin-like (mannose-binding) lectin
Solyc01g112230	-6.71866	4.53805e-07	1.82366e-06	PGPS/NH21 (AHRD V1 **-- Q9ZTM1_PETHY)%3B contains Interpro domain(s) IPR000316 Plant EC metallothionein-like protein%2C family 15
Solyc01g009470	-6.67673	5.91877e-08	2.69631e-07	Poly (AHRD V1 ***- B9SCR8_RICCO)%3B contains Interpro domain(s) IPR012317 Poly(ADP-ribose) polymerase%2C catalytic region
Solyc07g042230	-6.58733	2.64722e-11	1.85503e-10	Ethylene-responsive transcription factor 7 (AHRD V1 *-** ERF83_ARATH)%3B contains Interpro domain(s) IPR001471 Pathogenesis-related transcriptional factor and ERF%2C DNA-binding
Solyc12g098900	-6.43137	3.66194e-06	1.27425e-05	Late embryogenesis abundant protein D-29 (AHRD V1 *-*- LEA29_GOSHI)
Solyc02g087890	-6.28891	5.26796e-08	2.4186e-07	Unknown Protein (AHRD V1)
Solyc06g067980	-6.07184	2.91143e-10	1.78865e-09	Unknown Protein (AHRD V1)
Solyc05g053150	-6.01458	2.30312e-05	7.03442e-05	MYB transcription factor (AHRD V1 **** Q6R074_ARATH)%3B contains Interpro domain(s) IPR015495 Myb transcription factor
Solyc10g079150	-5.98168	7.68524e-06	2.53659e-05	Nuclear transcription factor Y subunit A-1 (AHRD V1 *-*- B6TAR1_MAIZE)%3B contains Interpro domain(s) IPR001289 CCAAT-binding transcription factor%2C subunit B
Solyc02g092340	-5.97056	2.56502e-09	1.39275e-08	Unknown Protein (AHRD V1)
Solyc10g008040	-5.91152	1.13826e-21	2.34223e-20	Seed biotin-containing protein SBP65 (AHRD V1 *-*- SBP65_PEA)%3B contains Interpro domain(s) IPR006777 Microvirus H protein (pilot protein)
Solyc01g109920	-5.88691	1.58835e-06	5.84759e-06	Dehydrin (AHRD V1 *-*- Q6YL18_BRAJU)%3B contains Interpro domain(s) IPR000167 Dehydrin
Solyc01g103920	-5.83288	7.12515e-28	2.73184e-26	Ferredoxin I (AHRD V1 ***- Q93XJ9_SOLTU)%3B contains Interpro domain(s) IPR010241 Ferredoxin [2Fe-2S]%2C plant
Solyc06g048840	-5.81024	8.75103e-13	7.30043e-12	Late embryogenesis abundant protein (AHRD V1 ***- A4VBF1_9FABA)%3B contains Interpro domain(s) IPR000389 Small hydrophilic plant seed protein
Solyc02g076910	-5.77797	6.55732e-05	0.000185559	Cathepsin B-like cysteine proteinase (AHRD V1 **-* CYSP_SCHMA)%3B contains Interpro domain(s) IPR013128 Peptidase C1A%2C papain
Solyc08g067630	-5.63816	1.18433e-14	1.22454e-13	Unknown Protein (AHRD V1)
Solyc01g104780	-5.57698	2.95581e-36	2.44629e-34	Nodulin-related integral membrane protein DUF125 (AHRD V1 *-*- C7JBI4_ACEP3)%3B contains Interpro domain(s) IPR008217 Protein of unknown function DUF125%2C transmembrane
Solyc04g078450	-5.51686	3.54575e-10	2.15161e-09	Unknown Protein (AHRD V1)
Solyc02g062390	-5.51142	7.39189e-07	2.86097e-06	Unknown Protein (AHRD V1)%3B contains Interpro domain(s) IPR000167 Dehydrin
Solyc02g076920	-5.42843	4.50454e-07	1.81132e-06	Transcription factor MYC2 (AHRD V1 *--* RAP1_ARATH)%3B contains Interpro domain(s) IPR001092 Basic helix-loop-helix dimerisation region bHLH
Solyc03g095650	-5.31872	6.20068e-39	6.89303e-37	MLO-like protein 17 (AHRD V1 ***- C6EWF0_VITVI)%3B contains Interpro domain(s) IPR004326 Mlo-related protein
Solyc01g057170	-5.282	5.21463e-09	2.72814e-08	Unknown Protein (AHRD V1)
Solyc06g051860	-5.28025	1.3902e-11	1.00337e-10	Inorganic phosphate transporter 6 (AHRD V1 **** Q5CC71_MAIZE)%3B contains Interpro domain(s) IPR016196 Major facilitator superfamily%2C general substrate transporter
Solyc01g007700	-5.20214	0.000422244	0.00103049	Conserved protein (AHRD V1 *-*- C7TFZ2_LACRL)
Solyc12g070080	-5.18293	3.76492e-08	1.75993e-07	N-acylethanolamine amidohydrolase (AHRD V1 **-- D7MRU1_ARALY)%3B contains Interpro domain(s) IPR000120 Amidase signature enzyme
Solyc01g096320	-5.05377	3.99981e-07	1.62194e-06	Homeobox leucine zipper protein (AHRD V1 ***- Q9XH73_PRUAR)%3B contains Interpro domain(s) IPR001356 Homeobox
Solyc08g083130	-5.04096	4.82206e-05	0.000139889	Homeobox leucine zipper protein (AHRD V1 *-*- B8YIB0_MIRJA)%3B contains Interpro domain(s) IPR001356 Homeobox
Solyc12g006590	-5.03152	1.43213e-13	1.31438e-12	Zinc finger RAN-binding domain containing 2 (AHRD V1 **** Q7SZF0_DANRE)%3B contains Interpro domain(s) IPR001876 Zinc finger%2C RanBP2-type
Solyc11g071760	-4.94826	1.17024e-13	1.08356e-12	Calmodulin-like protein (AHRD V1 ***- Q0VJ70_DATME)%3B contains Interpro domain(s) IPR018248 EF hand
Solyc02g084850	-4.8421	1.02672e-05	3.31369e-05	Unknown Protein (AHRD V1)%3B contains Interpro domain(s) IPR000167 Dehydrin
Solyc05g014280	-4.82664	1.30765e-21	2.67321e-20	Heat shock protein (AHRD V1 ***- A9QVH3_9FABA)%3B contains Interpro domain(s) IPR002068 Heat shock protein Hsp20
Solyc03g007230	-4.80862	1.86055e-12	1.48868e-11	Protein phosphatase 2C (AHRD V1 ***- B1B5N6_PHYPA)%3B contains Interpro domain(s) IPR015655 Protein phosphatase 2C
Solyc04g005380	-4.80661	3.65852e-11	2.51583e-10	Ninja-family protein Os03g0214200 (AHRD V1 ***- NNJA1_ORYSJ)%3B contains Interpro domain(s) IPR012463 Protein of unknown function DUF1675
Solyc11g020040	-4.79058	1.88082e-16	2.35881e-15	Chaperone DnaK (AHRD V1 ***- Q1SKX2_MEDTR)%3B contains Interpro domain(s) IPR012725 Chaperone DnaK
Solyc06g084770	-4.76412	1.23772e-12	1.01188e-11	Unknown Protein (AHRD V1)
Solyc09g015000	-4.73943	4.21328e-19	6.88903e-18	class I heat shock protein (AHRD V1 ***- Q69BI7_CARPA)%3B contains Interpro domain(s) IPR002068 Heat shock protein Hsp20
Solyc04g005250	-4.73156	1.11623e-16	1.43046e-15	DNA (Cytosine-5-)-methyltransferase 3 (AHRD V1 *-** B3DGP2_DANRE)%3B contains Interpro domain(s) IPR001525 C-5 cytosine-specific DNA methylase
Solyc02g093890	-4.71436	1.07648e-07	4.71747e-07	Unknown Protein (AHRD V1)
Solyc03g120420	-4.7128	1.01272e-09	5.81653e-09	Unknown Protein (AHRD V1)
Solyc06g065050	-4.68451	1.37113e-05	4.32639e-05	Transmembrane protein 205 (AHRD V1 *-*- TM205_MOUSE)
Solyc09g064820	-4.6518	3.35825e-06	1.17642e-05	Circadian clock coupling factor ZGT (AHRD V1 ***- Q94FM9_TOBAC)
Solyc01g106820	-4.6271	1.59102e-08	7.82679e-08	Peptidase M50 family (AHRD V1 ***- B6UET0_MAIZE)
Solyc08g062450	-4.62619	4.08136e-09	2.15808e-08	class II heat shock protein (AHRD V1 ***- B6T339_MAIZE)%3B contains Interpro domain(s) IPR002068 Heat shock protein Hsp20
Solyc10g076610	-4.59812	0.00255667	0.00532212	Lysyl-tRNA synthetase (AHRD V1 ***- B9SY11_RICCO)%3B contains Interpro domain(s) IPR002313 Lysyl-tRNA synthetase%2C class II
Solyc03g098100	-4.58991	0.00196991	0.00419125	Reductase 2 (AHRD V1 ***- Q6TY50_HYDMC)%3B contains Interpro domain(s) IPR020471 Aldo/keto reductase subgroup
Solyc06g066680	-4.57951	2.24294e-06	8.06007e-06	Mitochondrial carrier protein (AHRD V1 ***- D2VIZ2_NAEGR)%3B contains Interpro domain(s) IPR002067 Mitochondrial carrier protein
Solyc03g112590	-4.54951	1.2153e-09	6.91037e-09	Cell division protease ftsH homolog (AHRD V1 *--- FTSH_ODOSI)%3B contains Interpro domain(s) IPR005938 ATPase%2C AAA-type%2C CDC48
Solyc07g055840	-4.53746	4.59897e-12	3.51652e-11	Citrate synthase (AHRD V1 **** B9IFM7_POPTR)%3B contains Interpro domain(s) IPR010953 Citrate synthase%2C type II
Solyc06g084330	-4.53275	3.3426e-06	1.17181e-05	Hv711N16.16 (Fragment) (AHRD V1 *--- Q8LLC2_HORVU)%3B contains Interpro domain(s) IPR003864 Protein of unknown function DUF221
Solyc03g111100	-4.49692	1.04218e-08	5.25199e-08	AtIII18x5-like protein (Fragment) (AHRD V1 *-*- D9YU68_ARAHA)
Solyc01g108800	-4.48935	2.79887e-06	9.92493e-06	3-hydroxyisobutyryl-CoA hydrolase (AHRD V1 **** D3NUG5_AZOS1)%3B contains Interpro domain(s) IPR001753 Crotonase%2C core
Solyc02g077970	-4.46409	4.45428e-21	8.74427e-20	Late embryo abundance protein (Fragment) (AHRD V1 *-*- C6F8V9_PSEMZ)
Solyc12g088240	-4.42033	4.66752e-14	4.52938e-13	Cellulose synthase-like C1-1 glycosyltransferase family 2 protein (AHRD V1 ***- D8RV47_SELML)%3B contains Interpro domain(s) IPR001173 Glycosyl transferase%2C family 2
Solyc02g092350	-4.41619	3.88006e-07	1.57747e-06	Unknown Protein (AHRD V1)
Solyc12g070090	-4.35775	6.60895e-08	2.9897e-07	Glutamyl-tRNA(Gln) amidotransferase subunit A homolog (AHRD V1 *--- QRSL1_RAT)%3B contains Interpro domain(s) IPR000120 Amidase signature enzyme
Solyc10g083370	-4.35359	4.20229e-17	5.62711e-16	Unknown Protein (AHRD V1)
Solyc03g031470	-4.32033	4.93062e-10	2.93696e-09	Dihydroflavonol 4-reductase (AHRD V1 **** B9X2I6_ROSHC)%3B contains Interpro domain(s) IPR016040 NAD(P)-binding domain
Solyc01g097960	-4.29563	1.1804e-10	7.62857e-10	Late embryogenesis abundant protein D-34 (AHRD V1 **-- B6UH67_MAIZE)%3B contains Interpro domain(s) IPR007011 Seed maturation protein
Solyc02g079290	-4.29175	2.48302e-15	2.77011e-14	SELF PRUNING 2G
Solyc02g079930	-4.2777	5.83982e-25	1.67756e-23	Phosphosulfolactate synthase (AHRD V1 ***- Q1ASZ8_RUBXD)%3B contains Interpro domain(s) IPR003830 (2R)-phospho-3-sulpholactate synthase%2C ComA
Solyc09g063150	-4.27062	2.03574e-05	6.27076e-05	Glutathione S-transferase (AHRD V1 **** Q8H9E5_CUCMA)%3B contains Interpro domain(s) IPR017933 Glutathione S-transferase/chloride channel%2C C-terminal
Solyc06g053220	-4.26892	6.41457e-08	2.90807e-07	Homeobox leucine zipper protein (AHRD V1 ***- B8YIB0_MIRJA)%3B contains Interpro domain(s) IPR001356 Homeobox
Solyc04g072700	-4.25573	6.67833e-34	4.46497e-32	Metal ion binding protein (AHRD V1 **-* B6U811_MAIZE)%3B contains Interpro domain(s) IPR006121 Heavy metal transport/detoxification protein
Solyc01g087180	-4.25313	7.35063e-08	3.30374e-07	Unknown Protein (AHRD V1)
Solyc04g005610	-4.24635	4.15584e-41	5.74086e-39	NAC domain transcription factor (AHRD V1 **** Q5DM36_WHEAT)%3B contains Interpro domain(s) IPR003441 No apical meristem (NAM) protein
Solyc02g085590	-4.23042	1.09918e-07	4.80573e-07	Vicilin (Fragment) (AHRD V1 *--- B4X640_PISVE)%3B contains Interpro domain(s) IPR011051 Cupin%2C RmlC-type
Solyc02g068040	-4.22413	2.33912e-06	8.37367e-06	Unknown Protein (AHRD V1)
Solyc05g050220	-4.22318	4.20498e-18	6.25983e-17	G-box binding factor 3 (AHRD V1 **** D7LDY1_ARALY)%3B contains Interpro domain(s) IPR012900 G-box binding%2C MFMR
Solyc04g007630	-4.21778	0.00420082	0.00835317	Metal ion binding protein (AHRD V1 **-- B6U811_MAIZE)%3B contains Interpro domain(s) IPR006121 Heavy metal transport/detoxification protein
Solyc07g053360	-4.18062	1.11944e-12	9.22008e-12	Seed biotin-containing protein SBP65 (AHRD V1 *--- SBP65_PEA)%3B contains Interpro domain(s) IPR004238 Late embryogenesis abundant protein
Solyc02g084130	-4.1725	4.40279e-11	2.99476e-10	Unknown Protein (AHRD V1)
Solyc03g123710	-4.15937	7.26008e-28	2.7779e-26	Unknown Protein (AHRD V1)
Solyc07g053750	-4.14661	4.2207e-08	1.96273e-07	Zinc finger CCCH domain-containing protein 2 (AHRD V1 *-*- C3H2_ARATH)%3B contains Interpro domain(s) IPR000571 Zinc finger%2C CCCH-type
Solyc03g123540	-4.13714	1.7343e-14	1.76886e-13	class II heat shock protein (AHRD V1 ***- B6U175_MAIZE)%3B contains Interpro domain(s) IPR002068 Heat shock protein Hsp20
Solyc03g116630	-4.12369	1.13123e-17	1.60517e-16	Unknown Protein (AHRD V1)
Solyc03g098090	-4.10511	0.00636774	0.012128	UPF0497 membrane protein 17 (AHRD V1 ***- U497H_RICCO)%3B contains Interpro domain(s) IPR006702 Uncharacterised protein family UPF0497%2C trans-membrane plant
Solyc03g007790	-4.09663	5.36993e-06	1.81513e-05	Receptor-like protein kinase (AHRD V1 **** Q9FLV4_ARATH)%3B contains Interpro domain(s) IPR002290 Serine/threonine protein kinase
Solyc05g055460	-4.083	8.45518e-27	2.95805e-25	Unknown Protein (AHRD V1)
Solyc10g085880	-4.07993	1.73814e-25	5.34442e-24	UDP-glucosyltransferase family 1 protein (AHRD V1 ***- C6KI43_CITSI)%3B contains Interpro domain(s) IPR002213 UDP-glucuronosyl/UDP-glucosyltransferase
Solyc01g108210	-4.03983	8.85197e-29	3.62314e-27	Cytochrome P450
Solyc04g077650	-4.03647	4.87874e-23	1.15292e-21	Serine carboxypeptidase 1 (AHRD V1 ***- B6TC80_MAIZE)%3B contains Interpro domain(s) IPR001563 Peptidase S10%2C serine carboxypeptidase
Solyc03g013440	-4.02727	1.0437e-08	5.25822e-08	Amino acid transporter family protein (AHRD V1 **** D7LM67_ARALY)%3B contains Interpro domain(s) IPR013057 Amino acid transporter%2C transmembrane
Solyc12g013620	-4.01506	1.38585e-12	1.1271e-11	NAC domain protein IPR003441 (AHRD V1 ***- B9N1K9_POPTR)%3B contains Interpro domain(s) IPR003441 No apical meristem (NAM) protein
Solyc06g050800	-4.01369	1.23488e-09	7.01111e-09	Amino acid transporter (AHRD V1 **** B9HYI5_POPTR)%3B contains Interpro domain(s) IPR013057 Amino acid transporter%2C transmembrane
Solyc01g099980	-4.00565	9.10146e-11	5.93712e-10	Glycine-rich protein (AHRD V1 *--- D7M9Z2_ARALY)%3B contains Interpro domain(s) IPR009836 Protein of unknown function DUF1399
Solyc02g062960	-4.00005	6.21112e-13	5.25623e-12	Homeobox-leucine zipper protein (AHRD V1 *-*- Q9FXN8_ZINEL)%3B contains Interpro domain(s) IPR001356 Homeobox
Solyc03g123600	-3.99536	9.10684e-06	2.9626e-05	Alanine aminotransferase (AHRD V1 ***- Q6VEJ5_CAPAN)%3B contains Interpro domain(s) IPR004839 Aminotransferase%2C class I and II
Solyc01g091270	-3.9931	2.68127e-18	4.0706e-17	AT2G45380 protein (Fragment) (AHRD V1 ***- B9DGW8_ARATH)
Solyc10g084120	-3.9882	8.302e-10	4.81091e-09	Aquaporin (AHRD V1 ***- Q2Z1Z2_PRUMU)%3B contains Interpro domain(s) IPR012269 Aquaporin
Solyc07g065980	-3.98159	4.78315e-08	2.20518e-07	Alkaline alpha galactosidase I (AHRD V1 **-- Q3Y5A3_CUCSA)%3B contains Interpro domain(s) IPR008811 Raffinose synthase
Solyc10g083380	-3.96048	1.60426e-17	2.23254e-16	Unknown Protein (AHRD V1)%3B contains Interpro domain(s) IPR004827 Basic-leucine zipper (bZIP) transcription factor
Solyc08g077900	-3.95744	0.0213926	0.0362597	Expansin-like protein (AHRD V1 ***- Q0WRS3_ARATH)%3B contains Interpro domain(s) IPR007112 Expansin 45%2C endoglucanase-like
Solyc04g015200	-3.94131	1.05519e-16	1.35779e-15	6-phosphofructokinase 2 (AHRD V1 ***- B6TE72_MAIZE)%3B contains Interpro domain(s) IPR012004 Pyrophosphate-dependent phosphofructokinase TP0108
Solyc10g085210	-3.93085	2.66911e-05	8.05665e-05	BZIP family transcription factor (AHRD V1 ***- D7LZU5_ARALY)
Solyc06g074710	-3.92953	1.04879e-12	8.67999e-12	Hydroxycinnamoyl CoA shikimate/quinate hydroxycinnamoyltransferase-like protein (Fragment) (AHRD V1 **-* B9GF60_POPTR)%3B contains Interpro domain(s) IPR003480 Transferase
Solyc07g063420	-3.90897	1.63652e-26	5.60024e-25	NAC domain transcription factor (AHRD V1 *-** Q4U0D4_WHEAT)%3B contains Interpro domain(s) IPR003441 No apical meristem (NAM) protein
Solyc06g084170	-3.9085	3.96832e-15	4.3219e-14	Unknown Protein (AHRD V1)
Solyc03g046380	-3.90348	2.42806e-16	3.01294e-15	Seed maturation protein PM41 (AHRD V1 ***- Q9SWB2_SOYBN)
Solyc02g068030	-3.89599	6.109e-09	3.16606e-08	Unknown Protein (AHRD V1)
Solyc07g045140	-3.8825	8.87115e-33	5.27412e-31	Uncharacterized membrane protein At3g27390 (AHRD V1 ***- Y3739_ARATH)
Solyc04g071780	-3.86096	2.14072e-11	1.51707e-10	Cytochrome P450
Solyc10g076250	-3.86041	4.12709e-19	6.76576e-18	Aminotransferase like protein (AHRD V1 ***- Q0WWF1_ARATH)%3B contains Interpro domain(s) IPR005814 Aminotransferase class-III
Solyc07g063410	-3.85966	1.35244e-09	7.6416e-09	NAC domain protein IPR003441 (AHRD V1 ***- B9HZY3_POPTR)%3B contains Interpro domain(s) IPR003441 No apical meristem (NAM) protein
Solyc02g081550	-3.85924	1.01003e-14	1.05302e-13	ATP-dependent Zn protease cell division protein FtsH homolog (AHRD V1 **** B2XTF7_HETA2)%3B contains Interpro domain(s) IPR001315 Caspase Recruitment IPR003960 ATPase%2C AAA-type%2C conserved site IPR005936 Peptidase M41%2C FtsH IPR006025 Peptidase M%2C neutral zinc metallopeptidases%2C zinc-binding site
Solyc10g054790	-3.8465	9.79822e-09	4.95103e-08	Aquaporin (AHRD V1 ***- Q40266_MESCR)%3B contains Interpro domain(s) IPR000425 Major intrinsic protein
Solyc07g040680	-3.84054	6.48165e-18	9.46896e-17	Heat stress transcription factor A3 (AHRD V1 **** D1M7W9_SOLLC)%3B contains Interpro domain(s) IPR000232 Heat shock factor (HSF)-type%2C DNA-binding
Solyc06g075650	-3.82581	1.15942e-38	1.23062e-36	Aquaporin (AHRD V1 ***- D6BRE1_9ROSI)%3B contains Interpro domain(s) IPR012269 Aquaporin
Solyc08g076880	-3.82011	1.59516e-09	8.93777e-09	Unknown Protein (AHRD V1)
Solyc07g063470	-3.80155	2.63694e-11	1.84921e-10	Unknown Protein (AHRD V1)
Solyc03g116530	-3.78725	4.61033e-06	1.57509e-05	Glyoxalase/bleomycin resistance protein/dioxygenase (AHRD V1 ***- Q2HVV5_MEDTR)%3B contains Interpro domain(s) IPR004360 Glyoxalase/bleomycin resistance protein/dioxygenase
Solyc03g096670	-3.78303	3.70204e-07	1.50967e-06	Integrin-linked kinase-associated serine/threonine phosphatase 2C (AHRD V1 *-** ILKAP_RAT)%3B contains Interpro domain(s) IPR015655 Protein phosphatase 2C
Solyc09g015020	-3.78001	7.66572e-09	3.93057e-08	class I heat shock protein 3 (AHRD V1 ***- B6TDB5_MAIZE)%3B contains Interpro domain(s) IPR002068 Heat shock protein Hsp20
Solyc03g113930	-3.77969	4.31936e-05	0.000126241	class IV heat shock protein (AHRD V1 ***- B6T3F5_MAIZE)%3B contains Interpro domain(s) IPR002068 Heat shock protein Hsp20
Solyc06g036470	-3.76923	0.0269397	0.0446704	Receptor-like protein kinase (AHRD V1 **** Q9FLV4_ARATH)%3B contains Interpro domain(s) IPR002290 Serine/threonine protein kinase
Solyc08g065610	-3.76645	3.67588e-06	1.27863e-05	Vacuolar processing enzyme-1b (AHRD V1 **-- Q852T2_TOBAC)%3B contains Interpro domain(s) IPR001096 Peptidase C13%2C legumain
Solyc11g008020	-3.7453	6.01891e-19	9.68326e-18	Ras-related protein Rab-18 (AHRD V1 ***- B6TSE5_MAIZE)%3B contains Interpro domain(s) IPR015598 Rab18
Solyc02g071090	-3.73853	0.000331192	0.000824884	Purine permease family protein (AHRD V1 **-* D7MCV2_ARALY)%3B contains Interpro domain(s) IPR004853 Protein of unknown function DUF250
Solyc07g053890	-3.72739	2.14642e-14	2.168e-13	O-acyltransferase WSD1 (AHRD V1 **-- WSD1_ARATH)%3B contains Interpro domain(s) IPR009721 Protein of unknown function DUF1298
Solyc04g082200	-3.72725	3.68232e-16	4.48346e-15	Dehydrin (AHRD V1 *-*- Q1A4H3_COFCA)%3B contains Interpro domain(s) IPR000167 Dehydrin
Solyc08g061230	-3.70338	5.46364e-06	1.84481e-05	Hydrolase-like protein (AHRD V1 ***- Q8H5Y0_ORYSJ)%3B contains Interpro domain(s) IPR000073 Alpha/beta hydrolase fold-1
Solyc11g056650	-3.69896	3.6912e-07	1.50557e-06	BHLH transcription factor (AHRD V1 *-*- B6TXR4_MAIZE)%3B contains Interpro domain(s) IPR001092 Basic helix-loop-helix dimerisation region bHLH
Solyc07g052620	-3.67237	2.73764e-05	8.2529e-05	Zinc finger protein CONSTANS-LIKE 4 (AHRD V1 *-*- COL4_ARATH)%3B contains Interpro domain(s) IPR000315 Zinc finger%2C B-box
Solyc01g108540	-3.66555	1.03309e-23	2.6697e-22	Acetyl esterase (AHRD V1 *--- AES_SHIFL)%3B contains Interpro domain(s) IPR013094 Alpha/beta hydrolase fold-3
Solyc03g112280	-3.63937	8.22552e-31	4.01384e-29	C2 domain-containing protein (AHRD V1 ***- D7MPJ8_ARALY)%3B contains Interpro domain(s) IPR004182 GRAM
Solyc08g007830	-3.63856	1.89517e-07	8.03714e-07	Ethylene-responsive transcription factor 10 (AHRD V1 *-** ERF77_ARATH)%3B contains Interpro domain(s) IPR001471 Pathogenesis-related transcriptional factor and ERF%2C DNA-binding
Solyc06g036290	-3.63512	1.10905e-20	2.09404e-19	Heat shock protein 90 (Fragment) (AHRD V1 **-- Q00NU9_WHEAT)%3B contains Interpro domain(s) IPR003594 ATP-binding region%2C ATPase-like IPR001404 Heat shock protein Hsp90
Solyc01g102300	-3.62995	2.61352e-38	2.65406e-36	BHLH transcription factor (AHRD V1 *-** B6TXR4_MAIZE)%3B contains Interpro domain(s) IPR011598 Helix-loop-helix DNA-binding
Solyc03g082730	-3.629	1.09839e-17	1.56093e-16	Unknown Protein (AHRD V1)
Solyc08g080090	-3.62353	1.69372e-56	7.39997e-54	Senescence-inducible chloroplast stay-green protein 2 (AHRD V1 **-- Q5EMP6_SOYBN)
Solyc08g007820	-3.6164	3.32746e-15	3.66215e-14	Ethylene-responsive transcription factor 10 (AHRD V1 *-** ERF77_ARATH)%3B contains Interpro domain(s) IPR001471 Pathogenesis-related transcriptional factor and ERF%2C DNA-binding
Solyc06g084760	-3.59345	2.04174e-12	1.62259e-11	Cytochrome P450 monooxygenase CYP72A68 (AHRD V1 ***- Q2MJ19_MEDTR)%3B contains Interpro domain(s) IPR001128 Cytochrome P450
Solyc06g066700	-3.58773	1.93474e-47	4.5435e-45	Unknown Protein (AHRD V1)
Solyc08g075280	-3.58402	3.38621e-11	2.33971e-10	Uncharacterized membrane protein (AHRD V1 *-*- A5GLU3_SYNPW)%3B contains Interpro domain(s) IPR005134 Uncharacterised protein family UPF0114
Solyc06g068690	-3.57557	6.02905e-08	2.74256e-07	Glutamyl-tRNA(Gln) amidotransferase subunit A (AHRD V1 ***- A3HSJ3_9BACT)%3B contains Interpro domain(s) IPR000120 Amidase signature enzyme
Solyc06g071820	-3.57408	3.78237e-06	1.31276e-05	Speckle-type poz protein (AHRD V1 *--- Q179U2_AEDAE)%3B contains Interpro domain(s) IPR000197 Zinc finger%2C TAZ-type
Solyc01g091850	-3.56622	1.20141e-15	1.38727e-14	Integral membrane protein (AHRD V1 ***- Q22DU5_TETTH)%3B contains Interpro domain(s) IPR008217 Protein of unknown function DUF125%2C transmembrane
Solyc02g078400	-3.56392	3.856e-47	8.42357e-45	Allantoinase (AHRD V1 **** Q6S4R9_ROBPS)%3B contains Interpro domain(s) IPR017593 Allantoinase
Solyc09g098590	-3.56318	3.33063e-17	4.50811e-16	Sucrose synthase (AHRD V1 **** Q84T18_SOLTU)%3B contains Interpro domain(s) IPR012820 Sucrose synthase%2C plants and cyanobacteria IPR000368 Sucrose synthase
Solyc06g060910	-3.55581	6.50813e-12	4.88487e-11	Glycerol-3-phosphate transporter (AHRD V1 **** B0SG38_LEPBA)%3B contains Interpro domain(s) IPR016196 Major facilitator superfamily%2C general substrate transporter
Solyc11g005930	-3.55086	3.43953e-05	0.000102096	ST63-2 (AHRD V1 ***- B4YYB2_THEHA)
Solyc02g083280	-3.53957	8.91418e-09	4.53236e-08	Thiosulfate sulfurtransferase/rhodanese-like domain-containing protein 1 (AHRD V1 *--* TSTD1_HUMAN)%3B contains Interpro domain(s) IPR001763 Rhodanese-like
Solyc02g084980	-3.53939	4.01755e-29	1.70378e-27	Galactinol synthase (AHRD V1 ***- C7G304_SOLLC)%3B contains Interpro domain(s) IPR002495 Glycosyl transferase%2C family 8
Solyc04g011440	-3.5375	3.48813e-26	1.16191e-24	heat shock protein (AHRD V1 ***- B2D2G5_CAPSN)%3B contains Interpro domain(s) IPR013126 Heat shock protein 70
Solyc11g009100	-3.53665	5.19126e-06	1.75885e-05	ABC transporter G family member 11 (AHRD V1 ***- AB11G_ARATH)%3B contains Interpro domain(s) IPR013525 ABC-2 type transporter
Solyc09g005660	-3.53149	1.17527e-12	9.63811e-12	HAT family dimerisation domain containing protein expressed (AHRD V1 ***- Q10BC8_ORYSJ)%3B contains Interpro domain(s) IPR007021 Protein of unknown function DUF659
Solyc05g053760	-3.52823	1.40825e-17	1.97734e-16	Chaperone protein dnaJ 20 (AHRD V1 ***- B6U349_MAIZE)%3B contains Interpro domain(s) IPR001623 Heat shock protein DnaJ%2C N-terminal
Solyc02g063520	-3.52666	9.91251e-18	1.41617e-16	Homeobox-leucine zipper protein 22 (AHRD V1 ***- D7MA03_ARALY)%3B contains Interpro domain(s) IPR003106 Leucine zipper%2C homeobox-associated
Solyc11g072310	-3.52212	5.49074e-05	0.000157777	Gibberellin 20-oxidase-3 (AHRD V1 **** Q9ZPP2_SOLLC)%3B contains Interpro domain(s) IPR005123 Oxoglutarate and iron-dependent oxygenase
Solyc03g114160	-3.50915	6.14401e-12	4.6208e-11	U-box domain-containing protein (AHRD V1 ***- D7KBV1_ARALY)%3B contains Interpro domain(s) IPR011989 Armadillo-like helical
Solyc04g081900	-3.50238	1.01305e-16	1.30536e-15	Nucleoredoxin 1 (AHRD V1 **-- A8I9L1_CHLRE)%3B contains Interpro domain(s) IPR017936 Thioredoxin-like
Solyc05g052980	-3.49692	1.13664e-14	1.17654e-13	Protein phosphatase 2C (AHRD V1 ***- Q8RVG0_TOBAC)%3B contains Interpro domain(s) IPR015655 Protein phosphatase 2C
Solyc02g079490	-3.49219	4.70154e-32	2.58268e-30	Hydroxycinnamoyl-CoA shikimate/quinate hydroxycinnamoyl transferase (AHRD V1 **-* D1GJ94_COFAR)%3B contains Interpro domain(s) IPR003480 Transferase
Solyc03g113510	-3.48171	6.73495e-11	4.47733e-10	Contig An16c0080 complete genome (AHRD V1 ***- A2R766_ASPNC)
Solyc11g012590	-3.47564	8.33979e-23	1.92955e-21	UPF0497 membrane protein 12 (AHRD V1 ***- U497C_VITVI)%3B contains Interpro domain(s) IPR006459 Uncharacterised protein family UPF0497%2C trans-membrane plant subgroup
Solyc09g007270	-3.46834	2.20193e-09	1.20852e-08	Ascorbate peroxidase (AHRD V1 **** B9VRH6_CITMA)%3B contains Interpro domain(s) IPR002207 Plant ascorbate peroxidase
Solyc01g103990	-3.44876	6.4465e-33	3.93216e-31	T-complex protein 11 (AHRD V1 ***- D7KML1_ARALY)%3B contains Interpro domain(s) IPR008862 T-complex 11
Solyc05g015890	-3.44571	2.29807e-11	1.62308e-10	Genomic DNA chromosome 5 TAC clone K24M7 (AHRD V1 **-- Q9FHB8_ARATH)
Solyc03g118850	-3.44523	1.57596e-10	1.0033e-09	Hydrolase alpha/beta fold family (AHRD V1 *--- Q1DF33_MYXXD)
Solyc12g049350	-3.43459	4.73454e-32	2.59323e-30	Myb 12 transcription factor (AHRD V1 ***- D2EBC3_9SOLN)%3B contains Interpro domain(s) IPR015495 Myb transcription factor
Solyc07g065930	-3.43425	7.71973e-12	5.74151e-11	BTB/POZ domain-containing protein (AHRD V1 **-- D7KN20_ARALY)%3B contains Interpro domain(s) IPR013089 Kelch related
Solyc07g005210	-3.42935	5.0538e-23	1.19278e-21	Outer membrane lipoprotein blc (AHRD V1 **-- D0RZG9_ACICA)%3B contains Interpro domain(s) IPR002345 Lipocalin
Solyc12g042090	-3.42713	2.42297e-23	5.9426e-22	Unknown Protein (AHRD V1)
Solyc11g071740	-3.42574	5.97848e-19	9.63273e-18	Calmodulin-like protein (AHRD V1 ***- Q0VJ70_DATME)%3B contains Interpro domain(s) IPR011992 EF-Hand type
Solyc02g083520	-3.42127	1.41716e-12	1.15007e-11	BZIP transcription factor (AHRD V1 *-** Q32WR6_MALDO)%3B contains Interpro domain(s) IPR011616 bZIP transcription factor%2C bZIP-1
Solyc10g081840	-3.41275	6.09031e-07	2.3962e-06	Nuclear transcription factor Y subunit A-1 (AHRD V1 ***- B6TAR1_MAIZE)%3B contains Interpro domain(s) IPR001289 CCAAT-binding transcription factor%2C subunit B
Solyc11g066100	-3.40992	6.2155e-28	2.40269e-26	heat shock protein (AHRD V1 ***- B2D2G5_CAPSN)%3B contains Interpro domain(s) IPR013126 Heat shock protein 70
Solyc08g061240	-3.4002	9.1547e-07	3.49856e-06	Catalytic/ hydrolase (AHRD V1 **** B6TP84_MAIZE)%3B contains Interpro domain(s) IPR000073 Alpha/beta hydrolase fold-1
Solyc06g051940	-3.39917	1.15118e-16	1.47324e-15	Protein phosphatase 2C (AHRD V1 **** A1IGC7_TOBAC)%3B contains Interpro domain(s) IPR015655 Protein phosphatase 2C
Solyc09g015450	-3.38359	6.71863e-05	0.000189695	Unknown Protein (AHRD V1)
Solyc09g075140	-3.37798	4.14746e-14	4.03931e-13	Lipase-like protein (AHRD V1 **-- Q9M3D1_ARATH)
Solyc11g020330	-3.36827	7.80729e-07	3.01249e-06	class IV heat shock protein (AHRD V1 ***- B6TXB5_MAIZE)%3B contains Interpro domain(s) IPR002068 Heat shock protein Hsp20
Solyc01g108080	-3.34258	1.00527e-33	6.53497e-32	BZIP transcription factor (AHRD V1 **-* Q0PN11_9FABA)%3B contains Interpro domain(s) IPR011616 bZIP transcription factor%2C bZIP-1
Solyc12g088670	-3.34023	8.62517e-12	6.36704e-11	Cathepsin B-like cysteine proteinase (AHRD V1 **-- CYSP_SCHMA)%3B contains Interpro domain(s) IPR013128 Peptidase C1A%2C papain IPR000169 Peptidase%2C cysteine peptidase active site IPR000668 Peptidase C1A%2C papain C-terminal
Solyc03g115370	-3.32997	2.69767e-23	6.5649e-22	Diacylglycerol kinase 1 (AHRD V1 **** A8QM12_MAIZE)%3B contains Interpro domain(s) IPR000756 Diacylglycerol kinase accessory region
Solyc04g082830	-3.32078	8.54283e-15	9.01146e-14	Auxin efflux carrier family protein (AHRD V1 **** D7KJ74_ARALY)%3B contains Interpro domain(s) IPR004776 Auxin efflux carrier
Solyc01g095930	-3.31902	3.95967e-13	3.43287e-12	O-acyltransferase WSD1 (AHRD V1 **-- WSD1_ARATH)%3B contains Interpro domain(s) IPR004255 Uncharacterised protein family UPF0089
Solyc04g016420	-3.31358	0.0002258	0.000580711	Unknown Protein (AHRD V1)
Solyc03g117420	-3.31224	9.90752e-17	1.28102e-15	Leucine-rich repeat family protein (AHRD V1 ***- D7KDI8_ARALY)%3B contains Interpro domain(s) IPR006553 Leucine-rich repeat%2C cysteine-containing subtype
Solyc12g089220	-3.31145	1.78084e-06	6.49644e-06	Wound responsive protein (Fragment) (AHRD V1 *--- A6N0L4_ORYSI)%3B contains Interpro domain(s) IPR003729 Protein of unknown function DUF151
Solyc07g038110	-3.31007	3.30276e-09	1.7703e-08	Beta-galactosidase (AHRD V1 *-*- Q0EDA9_PERAE)%3B contains Interpro domain(s) IPR000922 D-galactoside/L-rhamnose binding SUEL lectin
Solyc05g055010	-3.30871	3.15397e-14	3.11206e-13	RNA-binding protein (AHRD V1 **-- D3TPM8_GLOMM)%3B contains Interpro domain(s) IPR015464 RNA recognition motif-related
Solyc01g102960	-3.30629	1.03935e-09	5.96403e-09	class IV heat shock protein (AHRD V1 ***- B6T3F5_MAIZE)%3B contains Interpro domain(s) IPR002068 Heat shock protein Hsp20
Solyc10g079210	-3.30414	1.19643e-18	1.87155e-17	Abscisic acid insensitive 8 homologue (AHRD V1 **-- A5A6Q2_WHEAT)
Solyc02g087990	-3.30412	1.51863e-06	5.61182e-06	cDNA clone J023065D24 full insert sequence (AHRD V1 *-*- B7EKP5_ORYSJ)%3B contains Interpro domain(s) IPR012870 Protein of unknown function DUF1666
Solyc11g068390	-3.30361	1.93234e-24	5.29969e-23	Unknown Protein (AHRD V1)
Solyc12g088250	-3.30206	3.56089e-21	7.02715e-20	Serine carboxypeptidase 1 (AHRD V1 ***- B6TC80_MAIZE)%3B contains Interpro domain(s) IPR001563 Peptidase S10%2C serine carboxypeptidase
Solyc02g020880	-3.29536	5.44208e-33	3.34119e-31	Unknown Protein (AHRD V1)
Solyc07g042540	-3.29065	3.85985e-15	4.21599e-14	Unknown Protein (AHRD V1)
Solyc02g077980	-3.2781	4.08728e-09	2.1606e-08	Unknown Protein (AHRD V1)
Solyc01g009270	-3.26822	6.83068e-08	3.08259e-07	Unknown Protein (AHRD V1)
Solyc05g024260	-3.25602	3.00407e-16	3.69114e-15	RAG1-activating protein 1 homolog (AHRD V1 **-- R1AP1_DANRE)%3B contains Interpro domain(s) IPR018179 RAG1-activating protein 1 homologue
Solyc01g095940	-3.25594	9.25016e-05	0.000254963	O-acyltransferase WSD1 (AHRD V1 **-- WSD1_ARATH)%3B contains Interpro domain(s) IPR009721 Protein of unknown function DUF1298
Solyc07g051930	-3.23845	0.000121305	0.000327578	Protein serine/threonine kinase (AHRD V1 **** D3BP85_POLPA)%3B contains Interpro domain(s) IPR002290 Serine/threonine protein kinase
Solyc01g095140	-3.23721	1.55839e-06	5.74631e-06	Late embryogenesis abundant protein (Fragment) (AHRD V1 **-- B7TGG5_PINSY)%3B contains Interpro domain(s) IPR013990 Water Stress and Hypersensitive response
Solyc05g012210	-3.23683	2.36867e-35	1.7589e-33	Ninja-family protein 1 (AHRD V1 *-*- NNJA1_WHEAT)%3B contains Interpro domain(s) IPR012463 Protein of unknown function DUF1675
Solyc05g013530	-3.23402	3.19778e-43	5.13475e-41	Octicosapeptide/Phox/Bem1p domain-containing protein (AHRD V1 *--- D7LRK8_ARALY)%3B contains Interpro domain(s) IPR000270 Octicosapeptide/Phox/Bem1p
Solyc05g015390	-3.2289	2.46864e-19	4.14462e-18	REF-like stress related protein 1 (AHRD V1 *--- Q6XNP4_HEVBR)%3B contains Interpro domain(s) IPR008802 Rubber elongation factor
Solyc05g056480	-3.20196	3.34052e-14	3.28922e-13	Pyruvate dehydrogenase E1 component alpha subunit (AHRD V1 **** D6YUM5_WADCW)%3B contains Interpro domain(s) IPR001017 Dehydrogenase%2C E1 component
Solyc04g079450	-3.19934	3.14867e-08	1.48928e-07	Proteinase inhibitor I4 serpin (AHRD V1 **-* Q2HSM8_MEDTR)%3B contains Interpro domain(s) IPR015554 Protease inhibitor I4%2C serpin%2C plant
Solyc01g109480	-3.19852	8.01884e-05	0.00022355	Suspensor-specific protein (AHRD V1 *-*- Q9FUP6_PHACN)
Solyc04g007290	-3.1975	3.64161e-07	1.48664e-06
Solyc02g077880	-3.19679	0.0027397	0.00567197	Auxin-repressed protein (AHRD V1 ***- Q6PXE1_9SOLN)%3B contains Interpro domain(s) IPR008406 Dormancyauxin associated
Solyc01g090410	-3.18578	3.32741e-11	2.30162e-10	Palmitoyl protein thioesterase family protein (AHRD V1 **** D7LRP2_ARALY)%3B contains Interpro domain(s) IPR002472 Palmitoyl protein thioesterase
Solyc08g016440	-3.17697	1.18932e-23	3.02761e-22	Unknown Protein (AHRD V1)
Solyc01g099800	-3.17139	4.74299e-20	8.39044e-19	Unknown Protein (AHRD V1)
Solyc05g007770	-3.16426	1.58578e-23	3.99893e-22	NAC domain transcription factor (AHRD V1 **** Q5DM36_WHEAT)%3B contains Interpro domain(s) IPR003441 No apical meristem (NAM) protein
Solyc06g053960	-3.15022	7.89727e-11	5.20101e-10	Heat stress transcription factor A3 (AHRD V1 ***- D1M7W9_SOLLC)%3B contains Interpro domain(s) IPR000232 Heat shock factor (HSF)-type%2C DNA-binding
Solyc01g088090	-3.14894	5.26364e-52	1.67607e-49	Hydrolase alpha/beta fold family protein (AHRD V1 ***- D7M5W5_ARALY)%3B contains Interpro domain(s) IPR000073 Alpha/beta hydrolase fold-1
Solyc07g040990	-3.1461	5.42709e-15	5.84626e-14	Protein phosphatase 2C (AHRD V1 ***- A5A6P8_WHEAT)%3B contains Interpro domain(s) IPR015655 Protein phosphatase 2C
Solyc02g082750	-3.13456	1.86694e-06	6.7868e-06	Phosphatidylinositol phosphate (PtdInsP) phosphatase involved in hydrolysis of PtdIns (AHRD V1 **** D6VWZ1_YEAST)%3B contains Interpro domain(s) IPR002013 Synaptojanin%2C N-terminal
Solyc12g042100	-3.11627	4.83467e-39	5.40649e-37	Unknown Protein (AHRD V1)
Solyc12g042110	-3.11401	9.06623e-28	3.44096e-26	Unknown Protein (AHRD V1)
Solyc01g079300	-3.11261	2.18901e-11	1.54954e-10	Stachyose synthase (AHRD V1 **-- Q8RW08_9LAMI)%3B contains Interpro domain(s) IPR008811 Raffinose synthase
Solyc09g005610	-3.10216	1.39062e-07	6.00448e-07	BZIP transcription factor (AHRD V1 *-*- Q8W5R8_ORYSA)
Solyc05g051880	-3.10051	9.61479e-19	1.51157e-17	Trehalose-6-phosphate phosphatase-like protein (AHRD V1 **** Q9LX18_ARATH)%3B contains Interpro domain(s) IPR003337 Trehalose-phosphatase
Solyc07g066330	-3.09839	3.20447e-05	9.56353e-05	NAC domain protein IPR003441 (AHRD V1 ***- B9HH13_POPTR)%3B contains Interpro domain(s) IPR003441 No apical meristem (NAM) protein
Solyc10g078590	-3.09747	8.42867e-20	1.46349e-18	Unknown Protein (AHRD V1)
Solyc02g090500	-3.09393	1.64432e-09	9.18852e-09	HAD-superfamily hydrolase subfamily IA variant 3 containing protein expressed (AHRD V1 ***- Q10ME8_ORYSJ)
Solyc06g051930	-3.09374	5.47772e-31	2.72971e-29	Pyruvate kinase family protein (AHRD V1 ***- D7LSF1_ARALY)%3B contains Interpro domain(s) IPR001697 Pyruvate kinase
Solyc05g015450	-3.08842	8.1739e-15	8.6417e-14	Unknown Protein (AHRD V1)
Solyc07g055260	-3.08561	9.77304e-20	1.68756e-18	Chaperone protein dnaJ 10 (AHRD V1 *-*- B6TAW2_MAIZE)%3B contains Interpro domain(s) IPR003095 Heat shock protein DnaJ
Solyc03g115220	-3.08512	2.58234e-43	4.21865e-41	Cytochrome P450
Solyc03g019710	-3.07639	8.06509e-09	4.11848e-08	MADS-box transcription factor (AHRD V1 ***- Q5KT55_9ASPA)%3B contains Interpro domain(s) IPR002100 Transcription factor%2C MADS-box
Solyc01g066570	-3.07112	3.14791e-06	1.10811e-05	Genomic DNA chromosome 5 TAC clone K14A3 (AHRD V1 *--- Q9FGQ9_ARATH)%3B contains Interpro domain(s) IPR007650 Protein of unknown function DUF581
Solyc01g094910	-3.07001	2.6434e-31	1.35318e-29	Ferric reductase oxidase (AHRD V1 **-* D6RVS5_HORVU)%3B contains Interpro domain(s) IPR013121 Ferric reductase%2C NAD binding
Solyc03g115230	-3.06676	5.05662e-38	4.89684e-36	ClpB chaperone (AHRD V1 ***- D6QXI5_TRYCR)%3B contains Interpro domain(s) IPR013093 ATPase associated with various cellular activities%2C AAA-2
Solyc04g007980	-3.06586	7.0695e-16	8.32693e-15	1-aminocyclopropane-1-carboxylate oxidase (AHRD V1 **-* B6SUN2_MAIZE)%3B contains Interpro domain(s) IPR005123 Oxoglutarate and iron-dependent oxygenase
Solyc04g071340	-3.06561	1.21299e-19	2.07735e-18	Fructose-1 6-bisphosphatase class 1 (AHRD V1 **** D3PE46_DEFDS)%3B contains Interpro domain(s) IPR000146 Fructose-1%2C6-bisphosphatase
Solyc04g081530	-3.05406	1.9453e-09	1.07648e-08	Chaperone protein dnaJ 11 (AHRD V1 *-*- B6SUM8_MAIZE)%3B contains Interpro domain(s) IPR001623 Heat shock protein DnaJ%2C N-terminal
Solyc06g082530	-3.05195	1.17513e-11	8.54709e-11	GRAS family transcription factor (AHRD V1 **-* B9GJL6_POPTR)%3B contains Interpro domain(s) IPR005202 GRAS transcription factor
Solyc08g078760	-3.04889	1.52878e-19	2.5992e-18	AT5g47580/MNJ7_17 (AHRD V1 ***- Q9FGJ9_ARATH)
Solyc07g044990	-3.04887	1.57502e-29	6.94598e-28	Transmembrane protein 56 (AHRD V1 ***- B6TI82_MAIZE)%3B contains Interpro domain(s) IPR006634 TRAM%2C LAG1 and CLN8 homology
Solyc04g072160	-3.04597	7.16057e-18	1.04122e-16	Prostaglandin E synthase 3 (AHRD V1 **-- B4FLE3_MAIZE)%3B contains Interpro domain(s) IPR017447 CS
Solyc08g005120	-3.04392	2.21696e-09	1.21606e-08	Cinnamoyl-CoA reductase-like protein (AHRD V1 *-*- Q9M0B3_ARATH)%3B contains Interpro domain(s) IPR016040 NAD(P)-binding domain
Solyc02g081170	-3.0388	3.16833e-23	7.63121e-22	Plastid-lipid-associated protein%2C chloroplastic (AHRD V1 **-- PAP_CITUN)%3B contains Interpro domain(s) IPR006843 PAP fibrillin
Solyc07g065420	-3.03226	5.89171e-07	2.32684e-06	Plant-specific domain TIGR01570 family protein (AHRD V1 ***- B6TX93_MAIZE)%3B contains Interpro domain(s) IPR006460 Protein of unknown function DUF617%2C plant
Solyc03g007960	-3.0304	1.3829e-10	8.86407e-10	Beta-carotene hydroxylase 2
Solyc10g078440	-3.02904	1.41355e-46	2.91828e-44	Unknown Protein (AHRD V1)%3B contains Interpro domain(s) IPR008889 VQ
Solyc01g060070	-3.0286	1.67589e-31	8.76067e-30	Pore protein homolog (AHRD V1 **-- Q3EA11_ARATH)%3B contains Interpro domain(s) IPR003397 Mitochondrial inner membrane translocase complex%2C subunit Tim17/22
Solyc06g053950	-3.02728	2.92475e-08	1.38896e-07	Heat stress transcription factor A-2c (AHRD V1 *-*- HFA2C_ORYSJ)
Solyc06g064610	-3.02668	8.84479e-36	6.92363e-34	Genomic DNA chromosome 5 P1 clone MKN22 (AHRD V1 ***- Q9LVC2_ARATH)
Solyc07g065990	-3.02256	2.01844e-07	8.53295e-07	Unknown Protein (AHRD V1)%3B contains Interpro domain(s) IPR000136 Oleosin
Solyc02g071020	-3.02224	1.3402e-07	5.80014e-07	Unknown Protein (AHRD V1)
Solyc01g099810	-3.02215	3.69787e-22	8.0129e-21	Arginine/serine-rich splicing factor (AHRD V1 ***- Q176A9_AEDAE)%3B contains Interpro domain(s) IPR000504 RNA recognition motif%2C RNP-1
Solyc05g008390	-3.02033	5.02713e-06	1.70632e-05	RING zinc finger-containing protein (AHRD V1 *--- Q54MR8_DICDI)%3B contains Interpro domain(s) IPR011016 Zinc finger%2C RING-CH-type
Solyc06g083800	-3.01952	8.03297e-16	9.40283e-15	Rop-interactive crib motif-containing protein 1 (AHRD V1 *--- D7LGA6_ARALY)%3B contains Interpro domain(s) IPR000095 PAK-box/P21-Rho-binding
Solyc06g076930	-3.01433	8.26145e-12	6.11777e-11	ABC transporter G family member 31 (AHRD V1 ***- AB31G_ARATH)%3B contains Interpro domain(s) IPR013525 ABC-2 type transporter
Solyc08g065840	-3.01121	3.20831e-28	1.26097e-26	Unknown Protein (AHRD V1)%3B contains Interpro domain(s) IPR012438 Protein of unknown function DUF1639
Solyc02g093330	-3.00908	2.44649e-23	5.99247e-22	Nup98 (Fragment) (AHRD V1 *--- A1YK38_DROME)%3B contains Interpro domain(s) IPR007230 Peptidase S59%2C nucleoporin
Solyc07g042630	-3.00637	7.80268e-17	1.01727e-15	Beta-Amyrin Synthase (AHRD V1 **** O82146_PANGI)%3B contains Interpro domain(s) IPR018333 Squalene cyclase
Solyc01g081310	-3.00491	3.48146e-50	9.34373e-48	Glutathione-S-transferase (AHRD V1 ***- B2BY02_9BRAS)%3B contains Interpro domain(s) IPR004045 Glutathione S-transferase%2C N-terminal IPR017933 Glutathione S-transferase/chloride channel%2C C-terminal
Solyc10g085130	-3.0045	5.01766e-16	6.01191e-15	Zinc finger family protein (AHRD V1 **-- D7M6I2_ARALY)%3B contains Interpro domain(s) IPR018957 Zinc finger%2C C3HC4 RING-type
Solyc06g011370	-2.99376	3.04962e-27	1.09757e-25	Chaperone protein clpB 2 (AHRD V1 ***- D4TPI3_9NOST)%3B contains Interpro domain(s) IPR004176 Clp%2C N-terminal
Solyc03g111310	-2.99298	4.52413e-09	2.38014e-08	AKIN gamma (AHRD V1 **-- Q7XYY0_MEDTR)%3B contains Interpro domain(s) IPR000644 Cystathionine beta-synthase%2C core
Solyc03g115850	-2.99016	1.50889e-08	7.44615e-08	NAC domain protein IPR003441 (AHRD V1 ***- B9I557_POPTR)%3B contains Interpro domain(s) IPR003441 No apical meristem (NAM) protein
Solyc11g010120	-2.98517	2.84387e-15	3.16141e-14	Peroxidase 17 (AHRD V1 ***- D7LE03_ARALY)%3B contains Interpro domain(s) IPR002016 Haem peroxidase%2C plant/fungal/bacterial
Solyc04g054320	-2.98248	2.81558e-19	4.69356e-18	BZIP transcription factor (AHRD V1 **** A7Y1S1_BRAJU)%3B contains Interpro domain(s) IPR011616 bZIP transcription factor%2C bZIP-1
Solyc08g067500	-2.97983	7.23222e-06	2.39802e-05	Non-specific lipid-transfer protein (AHRD V1 ***- A9YUH6_PLAOI)%3B contains Interpro domain(s) IPR013770 Plant lipid transfer protein and hydrophobic protein%2C helical
Solyc04g071990	-2.97891	1.84054e-44	3.2621e-42	Tomato GIGANTEA 1
Solyc07g017610	-2.9764	2.65524e-11	1.85996e-10	Saccharopine dehydrogenase (NAD(+) L-glutamate-forming) (AHRD V1 *-** C7PUW7_CHIPD)%3B contains Interpro domain(s) IPR005097 Saccharopine dehydrogenase
Solyc11g071830	-2.97447	3.80883e-16	4.6285e-15	Chaperone protein dnaj (AHRD V1 ***- Q17AX7_AEDAE)%3B contains Interpro domain(s) IPR003095 Heat shock protein DnaJ
Solyc12g095810	-2.95786	3.84545e-12	2.96448e-11	Solute carrier family 15 member 4 (AHRD V1 **-- S15A4_BOVIN)%3B contains Interpro domain(s) IPR000109 TGF-beta receptor%2C type I/II extracellular region
Solyc06g076400	-2.95591	2.35459e-35	1.75538e-33	Protein phosphatase 2C (AHRD V1 **** Q8RVG0_TOBAC)%3B contains Interpro domain(s) IPR015655 Protein phosphatase 2C
Solyc07g054770	-2.95172	2.50321e-09	1.36273e-08	Wound induced protein (AHRD V1 ***- B6SKC8_MAIZE)
Solyc01g010770	-2.94572	7.90478e-08	3.5342e-07	Spfh domain / band 7 family protein (AHRD V1 **-- B4AS86_FRANO)%3B contains Interpro domain(s) IPR001107 Band 7 protein
Solyc05g012810	-2.93799	1.2617e-07	5.48059e-07	Unknown Protein (AHRD V1)
Solyc11g022530	-2.93743	0.00207884	0.00439906	Transmembrane protein 205 (AHRD V1 *-*- B9EN72_SALSA)
Solyc02g086530	-2.92962	7.05384e-10	4.12451e-09	Alpha-galactosidase (AHRD V1 **-- C0NUM4_AJECG)%3B contains Interpro domain(s) IPR008811 Raffinose synthase
Solyc09g009590	-2.92448	4.12249e-11	2.81225e-10	Zinc finger A20 and AN1 domain-containing stress-associated protein 4 (AHRD V1 ***- SAP4_ARATH)%3B contains Interpro domain(s) IPR002653 Zinc finger%2C A20-type IPR000058 Zinc finger%2C AN1-type
Solyc08g059700	-2.92003	2.3784e-08	1.14367e-07	Genomic DNA chromosome 3 P1 clone MUJ8 (AHRD V1 ***- Q9LRN2_ARATH)
Solyc09g010940	-2.91876	2.24081e-24	6.11002e-23	Pyrimidine 5%26apos-nucleotidase (AHRD V1 ***- D5QKK7_METTR)%3B contains Interpro domain(s) IPR010237 Pyrimidine 5-nucleotidase
Solyc04g078340	-2.91139	5.55463e-06	1.87352e-05	Cytochrome P450
Solyc01g009260	-2.91047	3.24997e-07	1.33429e-06	60S ribosomal protein L5%2C mitochondrial (AHRD V1 *-*- RM05_SOLTU)
Solyc07g043050	-2.90175	5.82188e-09	3.02728e-08	UDP-glucosyltransferase (AHRD V1 **-* A7M6U9_IPONI)%3B contains Interpro domain(s) IPR002213 UDP-glucuronosyl/UDP-glucosyltransferase
Solyc09g014500	-2.89911	8.24555e-19	1.30725e-17	Yippee zinc-binding-like protein (AHRD V1 **** C1FDK9_9CHLO)%3B contains Interpro domain(s) IPR004910 Yippee-like protein
Solyc11g011980	-2.89338	1.81858e-06	6.62638e-06	WD-40 repeat protein (AHRD V1 *--- B2J557_NOSP7)%3B contains Interpro domain(s) IPR020472 G-protein beta WD-40 repeat%2C region
Solyc11g005230	-2.89278	2.21974e-06	7.98282e-06	Sensitivity to red light reduced protein 1 (AHRD V1 *--- D7MSG2_ARALY)%3B contains Interpro domain(s) IPR012942 SRR1
Solyc02g071210	-2.88431	9.72153e-15	1.01748e-13	Cold acclimation protein COR413-like (AHRD V1 *-*- A6YDU6_LOLTE)%3B contains Interpro domain(s) IPR008892 Cold acclimation WCOR413
Solyc10g086690	-2.88401	1.0899e-16	1.40054e-15	Phosphatidylcholine:ceramide cholinephosphotransferase 2 (AHRD V1 *-*- SMS2_MACFA)
Solyc06g074760	-2.88316	4.0604e-11	2.77291e-10	Neuralized (Fragment) (AHRD V1 *--- Q177Q7_AEDAE)%3B contains Interpro domain(s) IPR001841 Zinc finger%2C RING-type
Solyc08g067960	-2.87437	1.27419e-23	3.23927e-22	CHY zinc finger family protein expressed (AHRD V1 ***- Q337P2_ORYSJ)%3B contains Interpro domain(s) IPR008913 Zinc finger%2C CHY-type
Solyc05g053520	-2.87424	9.14535e-07	3.4957e-06	DNA polymerase delta subunit 4 family (AHRD V1 **** D7KJU8_ARALY)%3B contains Interpro domain(s) IPR007218 DNA polymerase delta%2C subunit 4
Solyc01g099590	-2.87316	6.11121e-15	6.53451e-14	Glutathione-S-transferase (AHRD V1 **** A3FMP5_SOLLC)%3B contains Interpro domain(s) IPR004046 Glutathione S-transferase%2C C-terminal
Solyc03g025430	-2.8697	6.32326e-18	9.25195e-17	Genomic DNA chromosome 5 TAC clone K24M7 (AHRD V1 **-- Q9FHB8_ARATH)
Solyc01g080460	-2.86699	5.10247e-36	4.1319e-34	Pyruvate phosphate dikinase (AHRD V1 ***- Q84N32_SORBI)%3B contains Interpro domain(s) IPR010121 Pyruvate%2C phosphate dikinase
Solyc12g099430	-2.86594	1.06866e-13	9.92925e-13	Epoxide hydrolase 1 (AHRD V1 ***- D8L7V7_PRUPE)%3B contains Interpro domain(s) IPR000639 Epoxide hydrolase-like
Solyc03g058970	-2.85603	2.05624e-25	6.23073e-24	Alkaline alpha galactosidase (AHRD V1 **-- B5UAS6_TETTT)%3B contains Interpro domain(s) IPR008811 Raffinose synthase
Solyc05g025870	-2.85543	9.07882e-22	1.89095e-20	Unknown Protein (AHRD V1)
Solyc05g014260	-2.85296	4.29648e-20	7.64376e-19	Response regulator 11 (AHRD V1 *-*- Q0WRT0_ARATH)%3B contains Interpro domain(s) IPR017053 Response regulator%2C plant B-type
Solyc05g012580	-2.84867	0.0102361	0.0186343	Unknown Protein (AHRD V1)
Solyc03g117800	-2.84372	3.08494e-31	1.57491e-29	CER1 protein (Fragment) (AHRD V1 *--- Q0WLZ2_ARATH)%3B contains Interpro domain(s) IPR006694 Fatty acid hydroxylase
Solyc01g081270	-2.84161	2.8994e-19	4.82471e-18	Glutathione S-transferase (AHRD V1 ***- Q8H9E5_CUCMA)%3B contains Interpro domain(s) IPR004046 Glutathione S-transferase%2C C-terminal
Solyc07g006860	-2.84075	4.79283e-05	0.000139084	Xyloglucan endotransglucosylase/hydrolase 3 (AHRD V1 **** Q06BI4_CUCME)%3B contains Interpro domain(s) IPR016455 Xyloglucan endotransglucosylase/hydrolase
Solyc07g065900	-2.83809	4.42228e-22	9.52769e-21	Fructose-bisphosphate aldolase (AHRD V1 ***- A9PEE1_POPTR)%3B contains Interpro domain(s) IPR000741 Fructose-bisphosphate aldolase%2C class-I
Solyc08g005510	-2.8356	1.38523e-18	2.1579e-17	Tir-nbs-lrr%2C resistance protein
Solyc06g068130	-2.83198	1.5816e-09	8.86442e-09	TPR domain protein (AHRD V1 *-*- B6U810_MAIZE)%3B contains Interpro domain(s) IPR011990 Tetratricopeptide-like helical
Solyc03g116680	-2.83099	8.57661e-25	2.41935e-23	Methyl binding domain protein (Fragment) (AHRD V1 *--- B9HAA5_POPTR)%3B contains Interpro domain(s) IPR001739 Methyl-CpG DNA binding
Solyc08g079430	-2.82778	5.40774e-10	3.19884e-09	Primary amine oxidase (AHRD V1 ***- B9RBR2_RICCO)%3B contains Interpro domain(s) IPR000269 Copper amine oxidase
Solyc02g071380	-2.82648	9.09055e-33	5.38576e-31	1-aminocyclopropane-1-carboxylate oxidase 3 (AHRD V1 **-- ACCO3_CUCME)%3B contains Interpro domain(s) IPR005123 Oxoglutarate and iron-dependent oxygenase
Solyc03g033410	-2.82332	1.18883e-24	3.32855e-23	Ubiquitin-conjugating enzyme E2 10 (AHRD V1 ***- UBC10_ARATH)%3B contains Interpro domain(s) IPR000608 Ubiquitin-conjugating enzyme%2C E2
Solyc07g051890	-2.82134	0.00755299	0.0141201	Protein serine/threonine kinase (AHRD V1 ***- D3BP85_POLPA)%3B contains Interpro domain(s) IPR002290 Serine/threonine protein kinase
Solyc02g079350	-2.8095	6.64869e-08	3.00623e-07	Equilibrative nucleoside transporter (AHRD V1 **** B9H1Z9_POPTR)%3B contains Interpro domain(s) IPR002259 Delayed-early response protein/equilibrative nucleoside transporter
Solyc01g105220	-2.80215	4.42058e-10	2.6491e-09	Alternative oxidase (AHRD V1 **** B2CKL9_VITVI)%3B contains Interpro domain(s) IPR002680 Alternative oxidase
Solyc07g038120	-2.80136	3.30993e-13	2.89495e-12	Beta-galactosidase (AHRD V1 **** Q8LP12_CAPAN)%3B contains Interpro domain(s) IPR001944 Glycoside hydrolase%2C family 35
Solyc07g017510	-2.80069	2.9074e-22	6.38846e-21	Phosphatidylinositol-4-phosphate 5-kinase family protein (AHRD V1 **-* D7L328_ARALY)%3B contains Interpro domain(s) IPR016034 Phosphatidylinositol-4-phosphate 5-kinase%2C core%2C subgroup
Solyc02g062580	-2.79638	9.54739e-53	3.14679e-50	Dolichyldiphosphatase 1 (AHRD V1 *--- C1C1U9_9MAXI)%3B contains Interpro domain(s) IPR000326 Phosphatidic acid phosphatase type 2/haloperoxidase
Solyc03g082420	-2.79488	0.000226133	0.000581329	Heat shock protein (AHRD V1 ***- A9QVH3_9FABA)%3B contains Interpro domain(s) IPR002068 Heat shock protein Hsp20
Solyc12g042120	-2.79198	6.94425e-31	3.42419e-29	Unknown Protein (AHRD V1)
Solyc07g055490	-2.79117	9.21313e-06	2.99438e-05	Cytochrome P450
Solyc02g084150	-2.7894	9.49233e-07	3.6217e-06	Unknown Protein (AHRD V1)
Solyc01g105660	-2.78609	2.10883e-27	7.72292e-26	1-aminocyclopropane-1-carboxylate oxidase (AHRD V1 **-- ACCO_TOBAC)%3B contains Interpro domain(s) IPR005123 Oxoglutarate and iron-dependent oxygenase
Solyc12g014100	-2.77935	2.69952e-19	4.50807e-18	Homogentisate 1 2-dioxygenase (AHRD V1 ***- D7MTP0_ARALY)%3B contains Interpro domain(s) IPR005708 Homogentisate 1%2C2-dioxygenase
Solyc11g068620	-2.7692	1.27533e-36	1.07926e-34	NAC-domain protein (AHRD V1 ***- Q9SXQ0_TOBAC)%3B contains Interpro domain(s) IPR003441 No apical meristem (NAM) protein
Solyc08g082130	-2.76819	1.69727e-18	2.61366e-17	Unknown Protein (AHRD V1)
Solyc03g114580	-2.76652	1.50926e-17	2.1097e-16	Uridine kinase (AHRD V1 *-*- C3SA58_BRADI)%3B contains Interpro domain(s) IPR000764 Uridine kinase
Solyc04g080540	-2.76353	1.29739e-08	6.45669e-08	ST225 (AHRD V1 ***- B4YYB7_THEHA)
Solyc03g007890	-2.76076	6.33699e-21	1.22862e-19	Heat shock protein 90 (Fragment) (AHRD V1 **-- Q2L3T8_WHEAT)%3B contains Interpro domain(s) IPR003594 ATP-binding region%2C ATPase-like IPR001404 Heat shock protein Hsp90
Solyc06g011400	-2.75864	4.55235e-21	8.91815e-20	ATP-dependent chaperone ClpB (AHRD V1 **** B5W0X8_SPIMA)%3B contains Interpro domain(s) IPR013093 ATPase associated with various cellular activities%2C AAA-2
Solyc11g065820	-2.75589	4.03368e-38	3.96758e-36	Mate efflux family protein (AHRD V1 **-- D7KHQ9_ARALY)%3B contains Interpro domain(s) IPR002528 Multi antimicrobial extrusion protein MatE
Solyc01g108570	-2.75435	5.94277e-25	1.70453e-23	Gibberellin receptor GID1L2 (AHRD V1 **-- B6TRC0_MAIZE)%3B contains Interpro domain(s) IPR013094 Alpha/beta hydrolase fold-3
Solyc11g011440	-2.74837	4.5708e-16	5.50106e-15	Aspartic proteinase nepenthesin-1 (AHRD V1 **-- B6TS94_MAIZE)%3B contains Interpro domain(s) IPR001461 Peptidase A1
Solyc06g011380	-2.74571	8.61197e-14	8.09371e-13	Chaperone ClpB (AHRD V1 ***- A5GSF0_SYNR3)
Solyc04g076600	-2.74254	9.32413e-06	3.02909e-05	p8MTCP1 (AHRD V1 ***- B6TKB9_MAIZE)%3B contains Interpro domain(s) IPR010625 CHCH
Solyc04g050620	-2.74045	1.48479e-07	6.39054e-07	Cytochrome P450
Solyc01g099580	-2.7396	0.000107302	0.000292285	Desiccation-related protein PCC13-62 (AHRD V1 *-*- B6TNA6_MAIZE)%3B contains Interpro domain(s) IPR011424 C1-like
Solyc00g136560	-2.73773	2.51252e-14	2.52286e-13	Undecaprenyl pyrophosphate synthase (AHRD V1 *-*- D8G636_9CYAN)%3B contains Interpro domain(s) IPR001441 Di-trans-poly-cis-decaprenylcistransferase-like
Solyc12g088230	-2.73742	6.40097e-41	8.46867e-39	Early-responsive to dehydration protein-like (AHRD V1 **-- Q5JKX1_ORYSJ)%3B contains Interpro domain(s) IPR003864 Protein of unknown function DUF221
Solyc03g078150	-2.73281	4.10009e-08	1.90995e-07	Amino acid transporter family protein (AHRD V1 **** D7LGK0_ARALY)%3B contains Interpro domain(s) IPR013057 Amino acid transporter%2C transmembrane
Solyc02g089120	-2.72668	4.01375e-53	1.34654e-50	Ch-cobra (AHRD V1 ***- B7S746_CUNLA)%3B contains Interpro domain(s) IPR017391 COBRA-like
Solyc07g024000	-2.72593	2.59398e-42	3.8677e-40	Dehydrogenase/ reductase 3 (AHRD V1 *--* Q3INM6_NATPD)%3B contains Interpro domain(s) IPR002347 Glucose/ribitol dehydrogenase
Solyc06g068330	-2.71732	0.000200816	0.000521601	Serine-rich protein (AHRD V1 *-*- Q8L8M8_ARATH)
Solyc02g079700	-2.71728	8.08545e-05	0.000225206	S-receptor kinase (AHRD V1 ***- Q43393_BRANA)
Solyc08g065220	-2.71405	3.14242e-25	9.35605e-24	Glycine dehydrogenase P protein (AHRD V1 **** Q6V9T1_ORYSJ)%3B contains Interpro domain(s) IPR003437 Glycine cleavage system P-protein
Solyc04g054760	-2.71254	1.64646e-24	4.57575e-23
Solyc06g076520	-2.70087	7.50229e-18	1.08838e-16	class I heat shock protein (AHRD V1 ***- Q69BI7_CARPA)%3B contains Interpro domain(s) IPR002068 Heat shock protein Hsp20
Solyc05g013370	-2.70006	8.04542e-09	4.10955e-08	Unknown Protein (AHRD V1)%3B contains Interpro domain(s) IPR002100 Transcription factor%2C MADS-box
Solyc02g071080	-2.69978	8.05872e-07	3.10435e-06	Purine permease family protein (AHRD V1 **-* D7MCV2_ARALY)%3B contains Interpro domain(s) IPR004853 Protein of unknown function DUF250
Solyc04g076690	-2.69634	1.61722e-12	1.3023e-11	Unknown Protein (AHRD V1)
Solyc06g069420	-2.69542	2.53939e-22	5.61926e-21	Universal stress protein family protein (AHRD V1 ***- D7KWY1_ARALY)%3B contains Interpro domain(s) IPR006016 UspA
Solyc03g112090	-2.69422	0.000144801	0.000386033	Component of high affinity nitrate transporter (AHRD V1 *--- D2KTV0_LOTJA)
Solyc01g104430	-2.69043	1.97613e-12	1.57445e-11	Unknown Protein (AHRD V1)
Solyc12g094410	-2.68906	3.2022e-11	2.22074e-10	Kinase family protein (AHRD V1 ***- D7MEZ1_ARALY)%3B contains Interpro domain(s) IPR015783 ATMRK serine/threonine protein kinase-like
Solyc08g083110	-2.68377	3.92754e-10	2.36952e-09	Cystathionine gamma-lyase (AHRD V1 ***- D2LF58_RHOVA)%3B contains Interpro domain(s) IPR000277 Cys/Met metabolism%2C pyridoxal phosphate-dependent enzyme
Solyc07g055560	-2.68338	3.02184e-20	5.46403e-19	G-type lectin S-receptor-like serine/threonine-protein kinase At2g19130 (AHRD V1 *--- Y2913_ARATH)%3B contains Interpro domain(s) IPR002401 Cytochrome P450%2C E-class%2C group I
Solyc11g069940	-2.68191	7.24616e-12	5.41502e-11	Glutaredoxin (AHRD V1 ***- B9H2P7_POPTR)%3B contains Interpro domain(s) IPR011905 Glutaredoxin-like%2C plant II
Solyc04g009960	-2.67902	7.50882e-19	1.19549e-17	L-allo-threonine aldolase (AHRD V1 **** D7RJ69_CARPA)%3B contains Interpro domain(s) IPR001597 Aromatic amino acid beta-eliminating lyase/threonine aldolase
Solyc05g041200	-2.67695	5.99669e-33	3.6697e-31	4-hydroxyphenylpyruvate dioxygenase (AHRD V1 **** B7X935_HEVBR)%3B contains Interpro domain(s) IPR005956 4-hydroxyphenylpyruvate dioxygenase
Solyc02g087780	-2.67598	4.23233e-13	3.65744e-12	Aldose-1-epimerase-like protein (AHRD V1 **** O48971_TOBAC)%3B contains Interpro domain(s) IPR015443 Aldose-1-epimerase
Solyc06g068600	-2.67552	5.31075e-14	5.13764e-13	Phosphate import ATP-binding protein pstB 1 (AHRD V1 **** B6UHM7_MAIZE)%3B contains Interpro domain(s) IPR005670 Phosphate transport system permease protein 1
Solyc01g079620	-2.67436	2.15086e-17	2.96683e-16	Myb 12 transcription factor (AHRD V1 **-- D2EBC3_9SOLN)%3B contains Interpro domain(s) IPR017930 Myb-type HTH DNA-binding domain
Solyc10g085140	-2.67418	4.12451e-13	3.57084e-12	Undecaprenyl pyrophosphate synthase (AHRD V1 ***- Q5QXS4_IDILO)%3B contains Interpro domain(s) IPR001441 Di-trans-poly-cis-decaprenylcistransferase-like
Solyc06g068450	-2.67224	2.53197e-24	6.87399e-23	CBL-interacting protein kinase (AHRD V1 **** A5YAI9_GOSHI)%3B contains Interpro domain(s) IPR002290 Serine/threonine protein kinase
Solyc06g068270	-2.67043	0.000444521	0.00108042	1-aminocyclopropane-1-carboxylate oxidase 1 (AHRD V1 **-* ACCO1_MALDO)%3B contains Interpro domain(s) IPR005123 Oxoglutarate and iron-dependent oxygenase
Solyc03g116270	-2.66904	9.11183e-23	2.10042e-21	Gibberellin 2-beta-dioxygenase 8 (AHRD V1 **** G2OX8_ARATH)%3B contains Interpro domain(s) IPR005123 Oxoglutarate and iron-dependent oxygenase
Solyc02g084240	-2.66047	3.62158e-10	2.1955e-09	H1 histone-like protein (AHRD V1 ***- Q43511_SOLLC)%3B contains Interpro domain(s) IPR005818 Histone H1/H5
Solyc08g005500	-2.66028	7.05093e-07	2.73973e-06	Cc-nbs-lrr%2C resistance protein
Solyc12g014010	-2.65766	6.07266e-30	2.72284e-28	Glucosyltransferase (AHRD V1 ***- Q8RU72_TOBAC)%3B contains Interpro domain(s) IPR002213 UDP-glucuronosyl/UDP-glucosyltransferase
Solyc02g071770	-2.65759	4.63379e-07	1.85975e-06	DUF1264 domain protein (AHRD V1 **-- A1CBM4_ASPCL)%3B contains Interpro domain(s) IPR010686 Protein of unknown function DUF1264
Solyc05g054350	-2.65236	7.34583e-12	5.48296e-11	Epoxide hydrolase (AHRD V1 **** Q41414_SOLTU)%3B contains Interpro domain(s) IPR000639 Epoxide hydrolase-like
Solyc04g006970	-2.64931	1.80534e-51	5.56016e-49	Phosphoenolpyruvate carboxylase (AHRD V1 **** A6YM33_RICCO)%3B contains Interpro domain(s) IPR015813 Pyruvate/Phosphoenolpyruvate kinase%2C catalytic core
Solyc09g014450	-2.64745	1.54165e-29	6.8148e-28	Unknown Protein (AHRD V1)%3B contains Interpro domain(s) IPR000996 Clathrin light chain
Solyc05g016180	-2.64001	5.50416e-14	5.31928e-13	Unknown Protein (AHRD V1)
Solyc04g080700	-2.63906	1.94543e-07	8.23541e-07	Wound responsive protein (Fragment) (AHRD V1 **-- A6N0L4_ORYSI)%3B contains Interpro domain(s) IPR003729 Protein of unknown function DUF151
Solyc01g068380	-2.63236	9.78968e-21	1.86153e-19	Purple acid phosphatase (AHRD V1 *-** B6TKL3_MAIZE)%3B contains Interpro domain(s) IPR004843 Metallophosphoesterase
Solyc05g013060	-2.6276	1.12465e-19	1.93133e-18	Unknown Protein (AHRD V1)
Solyc06g082440	-2.62662	2.54205e-09	1.38227e-08	CBL-interacting protein kinase 16 (AHRD V1 ***- A0MNK3_POPTR)%3B contains Interpro domain(s) IPR002290 Serine/threonine protein kinase
Solyc10g085870	-2.62654	2.42636e-30	1.13112e-28	UDP-glucosyltransferase family 1 protein (AHRD V1 ***- C6KI43_CITSI)%3B contains Interpro domain(s) IPR002213 UDP-glucuronosyl/UDP-glucosyltransferase
Solyc06g069710	-2.62496	1.68035e-07	7.1796e-07	NAC domain protein IPR003441 (AHRD V1 ***- B9I557_POPTR)%3B contains Interpro domain(s) IPR003441 No apical meristem (NAM) protein
Solyc01g088760	-2.62278	2.24376e-38	2.30347e-36	Cytochrome P450
Solyc11g005640	-2.62127	7.5542e-09	3.87868e-08	Ubiquitin (AHRD V1 ***- D0EUY5_9POAL)%3B contains Interpro domain(s) IPR019956 Ubiquitin subgroup
Solyc08g075570	-2.61836	0.000342235	0.000850246	Urea active transporter-like protein (AHRD V1 **** Q9FHJ8_ARATH)%3B contains Interpro domain(s) IPR019900 Sodium/solute symporter%2C subgroup
Solyc04g054220	-2.61306	2.45761e-17	3.37015e-16	Cytochrome P450
Solyc02g079710	-2.61186	4.47939e-07	1.80164e-06	Serine/threonine kinase receptor (AHRD V1 **** Q7DMS5_BRANA)%3B contains Interpro domain(s) IPR002290 Serine/threonine protein kinase
Solyc04g078640	-2.6117	5.82699e-12	4.39293e-11	Ethylene-responsive transcription factor 5 (AHRD V1 *-*- EF102_ARATH)%3B contains Interpro domain(s) IPR001471 Pathogenesis-related transcriptional factor and ERF%2C DNA-binding
Solyc08g061330	-2.61039	0.0280867	0.0463881	HAT family dimerisation domain containing protein (AHRD V1 ***- Q2R194_ORYSJ)%3B contains Interpro domain(s) IPR008906 HAT dimerisation
Solyc06g069430	-2.60895	7.2385e-36	5.78679e-34	MADS box transcription factor (AHRD V1 ***- Q9SBQ1_PETHY)%3B contains Interpro domain(s) IPR002487 Transcription factor%2C K-box
Solyc09g074480	-2.60782	0.000357515	0.000885281	Unknown Protein (AHRD V1)
Solyc06g050130	-2.60545	5.45106e-12	4.12773e-11	Alpha-galactosidase-like protein (AHRD V1 **** Q9LYL2_ARATH)%3B contains Interpro domain(s) IPR013785 Aldolase-type TIM barrel
Solyc06g068500	-2.60268	9.44071e-09	4.77937e-08	Chaperone protein DnaJ 1 (AHRD V1 *-*- D8USE3_9MICC)%3B contains Interpro domain(s) IPR001623 Heat shock protein DnaJ%2C N-terminal
Solyc05g024160	-2.60052	2.06419e-13	1.85355e-12	Pyruvate dehydrogenase E1 component subunit beta (AHRD V1 **-* B6T6H3_MAIZE)%3B contains Interpro domain(s) IPR005475 Transketolase%2C central region
Solyc06g066290	-2.60031	0.000377086	0.000929822	At1g31940/F5M6.6 (AHRD V1 ***- Q8VYV3_ARATH)
Solyc04g077220	-2.59884	6.33236e-09	3.2737e-08	Homeobox-leucine zipper protein 22 (AHRD V1 ***- D7MA03_ARALY)%3B contains Interpro domain(s) IPR003106 Leucine zipper%2C homeobox-associated
Solyc11g005650	-2.5937	6.50657e-10	3.81877e-09	Ubiquitin (AHRD V1 ***- Q2HTU3_MEDTR)%3B contains Interpro domain(s) IPR019956 Ubiquitin subgroup
Solyc09g092420	-2.5911	7.17873e-11	4.74716e-10	Amino acid permease-like protein (Fragment) (AHRD V1 *-*- B2ZME9_9ASTR)%3B contains Interpro domain(s) IPR002293 Amino acid/polyamine transporter I
Solyc03g059260	-2.58462	1.45613e-32	8.34824e-31	Carboxyl-terminal-processing protease (AHRD V1 ***- B6T6L2_MAIZE)%3B contains Interpro domain(s) IPR004447 Peptidase S41A%2C C-terminal protease
Solyc02g089770	-2.58422	5.09686e-43	7.97956e-41	Dihydroflavonol-4-reductase (AHRD V1 ***- B6TK03_MAIZE)%3B contains Interpro domain(s) IPR016040 NAD(P)-binding domain
Solyc07g045320	-2.58259	3.53498e-08	1.66029e-07	Unknown Protein (AHRD V1)
Solyc00g136260	-2.5823	1.4813e-10	9.4689e-10	Ring H2 finger protein (AHRD V1 *-*- D9ZHD8_HYPPE)%3B contains Interpro domain(s) IPR018957 Zinc finger%2C C3HC4 RING-type
Solyc09g089730	-2.58042	6.44407e-36	5.19592e-34	1-aminocyclopropane-1-carboxylate oxidase-like protein (AHRD V1 **-- Q9LTH7_ARATH)%3B contains Interpro domain(s) IPR005123 Oxoglutarate and iron-dependent oxygenase
Solyc12g006230	-2.57454	1.06016e-06	4.01315e-06	RING-H2 finger protein (AHRD V1 ***- Q30D22_PONTR)%3B contains Interpro domain(s) IPR018957 Zinc finger%2C C3HC4 RING-type
Solyc02g087840	-2.57382	2.87046e-07	1.18678e-06	Homeobox-leucine zipper-like protein (AHRD V1 *-*- Q3HRT1_PICGL)%3B contains Interpro domain(s) IPR001356 Homeobox
Solyc03g113250	-2.57303	6.25795e-08	2.83981e-07	Nitrate transporter (AHRD V1 **-* Q8LG02_ARATH)%3B contains Interpro domain(s) IPR000109 TGF-beta receptor%2C type I/II extracellular region
Solyc04g076820	-2.57274	9.30751e-19	1.46818e-17	Octicosapeptide/Phox/Bem1p domain-containing protein (AHRD V1 *--- D7MPG4_ARALY)%3B contains Interpro domain(s) IPR000270 Octicosapeptide/Phox/Bem1p
Solyc08g081030	-2.57126	6.25758e-24	1.64652e-22	HAD-superfamily hydrolase subfamily IA (AHRD V1 *-*- D9WQP9_STRHY)%3B contains Interpro domain(s) IPR005834 Haloacid dehalogenase-like hydrolase
Solyc11g013480	-2.56704	2.77904e-12	2.17904e-11	Auxin response factor 3 (AHRD V1 ***- A4L9W4_GOSHI)%3B contains Interpro domain(s) IPR010525 Auxin response factor
Solyc07g063910	-2.56557	2.00334e-09	1.10631e-08	Unknown Protein (AHRD V1)
Solyc07g062970	-2.56385	2.52301e-17	3.45479e-16	Serine/threonine phosphatase family protein (AHRD V1 **** C1E0J1_9CHLO)%3B contains Interpro domain(s) IPR015655 Protein phosphatase 2C
Solyc04g080960	-2.56314	3.11001e-09	1.67511e-08	Cysteine proteinase cathepsin F (AHRD V1 **-* D3TN89_GLOMM)%3B contains Interpro domain(s) IPR013128 Peptidase C1A%2C papain
Solyc01g109170	-2.56254	1.00633e-16	1.29848e-15	Cold acclimation protein COR413-like (AHRD V1 ***- A6YDU6_LOLTE)%3B contains Interpro domain(s) IPR008892 Cold acclimation WCOR413
Solyc04g076710	-2.56154	6.08667e-12	4.57951e-11	Unknown Protein (AHRD V1)
Solyc12g007060	-2.55868	5.55907e-12	4.2037e-11	Unknown Protein (AHRD V1)
Solyc08g077300	-2.55315	1.7969e-27	6.64534e-26	Adenylate kinase (AHRD V1 **** B6TE58_MAIZE)%3B contains Interpro domain(s) IPR006266 UMP-CMP kinase
Solyc03g116610	-2.55077	9.2087e-18	1.32064e-16	Ethylene-responsive transcription factor 7 (AHRD V1 *-** ERF83_ARATH)%3B contains Interpro domain(s) IPR001471 Pathogenesis-related transcriptional factor and ERF%2C DNA-binding
Solyc06g066600	-2.5502	1.82002e-17	2.52531e-16	Solute carrier family 2%2C facilitated glucose transporter member 3 (AHRD V1 **** GTR3_CANFA)%3B contains Interpro domain(s) IPR003663 Sugar/inositol transporter
Solyc06g062400	-2.54087	8.67104e-14	8.14514e-13	Chloroplast unusual positioning 1A (AHRD V1 *--- B3IYT7_ADICA)
Solyc02g077190	-2.53666	3.48937e-06	1.21781e-05	Unknown Protein (AHRD V1)
Solyc03g026050	-2.53434	0.00305187	0.00625865	Terminal flower 1 (Fragment) (AHRD V1 **-- B3VT13_9ROSA)%3B contains Interpro domain(s) IPR008914 Phosphatidylethanolamine-binding protein PEBP
Solyc02g078380	-2.5307	8.9447e-10	5.16265e-09	Aluminum-induced protein-like protein (AHRD V1 **-- Q8S2R9_THEHA)
Solyc03g121880	-2.52972	1.73554e-27	6.44381e-26	Protein phosphatase 2C (AHRD V1 ***- A5A6P8_WHEAT)%3B contains Interpro domain(s) IPR015655 Protein phosphatase 2C
Solyc10g018510	-2.52463	1.54831e-10	9.86704e-10	BHLH transcription factor (AHRD V1 *-** B6TXR4_MAIZE)%3B contains Interpro domain(s) IPR011598 Helix-loop-helix DNA-binding
Solyc07g052070	-2.51312	3.43434e-25	1.01448e-23	Cytochrome P450
Solyc07g041910	-2.50478	1.26656e-17	1.78506e-16	Cathepsin H (AHRD V1 ***- B2D1T2_PIG)%3B contains Interpro domain(s) IPR013128 Peptidase C1A%2C papain
Solyc12g013820	-2.50281	1.54412e-08	7.61003e-08	Ubiquitin-conjugating enzyme 23 (AHRD V1 *-*- D7L425_ARALY)%3B contains Interpro domain(s) IPR000608 Ubiquitin-conjugating enzyme%2C E2
Solyc02g072550	-2.50237	2.00338e-07	8.47312e-07	DOG1 alpha splice variant (Fragment) (AHRD V1 ***- A0SVJ8_ARATH)
Solyc08g044260	-2.49671	2.23931e-14	2.25576e-13	CER1 (AHRD V1 **-- B6TFH3_MAIZE)%3B contains Interpro domain(s) IPR006694 Fatty acid hydroxylase
Solyc02g084840	-2.49629	2.06313e-13	1.85355e-12	Dehydrin DHN1 (AHRD V1 *-*- DHN1_PEA)%3B contains Interpro domain(s) IPR000167 Dehydrin
Solyc01g111260	-2.48942	1.72415e-15	1.96075e-14	Phosphatidylinositol-specific phospholipase c (AHRD V1 *-*- B9UY71_LISMO)%3B contains Interpro domain(s) IPR017946 PLC-like phosphodiesterase%2C TIM beta/alpha-barrel domain
Solyc01g087240	-2.48828	4.63152e-25	1.34694e-23	Nuclear transcription factor Y subunit A-1 (AHRD V1 *-** B6TAR1_MAIZE)%3B contains Interpro domain(s) IPR001289 CCAAT-binding transcription factor%2C subunit B
Solyc01g111440	-2.48608	8.19427e-31	4.009e-29	Senescence-associated protein 12 (AHRD V1 *-*- O81657_HEMSP)%3B contains Interpro domain(s) IPR009686 Senescence-associated
Solyc06g068160	-2.48459	0.019515	0.0333617	5%26apos-AMP-activated protein kinase subunit gamma-3 (AHRD V1 **-- B1PM77_SHEEP)%3B contains Interpro domain(s) IPR000644 Cystathionine beta-synthase%2C core
Solyc08g077360	-2.4832	0.000176661	0.000463149	Dynamin 2 (AHRD V1 ***- Q4V8Z7_DANRE)%3B contains Interpro domain(s) IPR001401 Dynamin%2C GTPase region
Solyc08g023660	-2.47757	2.97561e-11	2.07354e-10	Major latex-like protein (AHRD V1 **-- B5THI3_PANGI)%3B contains Interpro domain(s) IPR000916 Bet v I allergen
Solyc12g005120	-2.47505	4.06014e-17	5.45232e-16	Genomic DNA chromosome 5 P1 clone MBG8 (AHRD V1 ***- Q9FFU3_ARATH)
Solyc03g006620	-2.47006	3.48307e-31	1.76855e-29	Cotton fiber expressed protein 1 (AHRD V1 ***- O81373_GOSHI)%3B contains Interpro domain(s) IPR008480 Protein of unknown function DUF761%2C plant
Solyc02g087210	-2.46473	8.379e-19	1.32729e-17	Zinc finger AN1 domain-containing stress-associated protein 12 (AHRD V1 ***- SAP12_ARATH)%3B contains Interpro domain(s) IPR000058 Zinc finger%2C AN1-type
Solyc04g081690	-2.46302	1.51567e-06	5.60311e-06	Unknown Protein (AHRD V1)
Solyc06g062680	-2.46295	1.05473e-06	3.9942e-06	Polyadenylate-binding protein 2 (AHRD V1 *-*- B6U4M0_MAIZE)%3B contains Interpro domain(s) IPR002164 Nucleosome assembly protein (NAP)
Solyc12g005130	-2.46006	1.90325e-23	4.74852e-22	Genomic DNA chromosome 5 P1 clone MBG8 (AHRD V1 ***- Q9FFU3_ARATH)
Solyc01g108790	-2.45902	2.0936e-09	1.1531e-08	3-hydroxyisobutyryl-CoA hydrolase-like protein 2%2C mitochondrial (AHRD V1 ***- HIBC5_ARATH)
Solyc10g075090	-2.45899	1.64614e-20	3.03791e-19	Non-specific lipid-transfer protein (AHRD V1 **** Q4A1N0_SOLLC)%3B contains Interpro domain(s) IPR013770 Plant lipid transfer protein and hydrophobic protein%2C helical
Solyc07g041900	-2.45884	1.06759e-07	4.68178e-07	Cathepsin L-like cysteine proteinase (AHRD V1 **** A7LJ78_DERVA)%3B contains Interpro domain(s) IPR013128 Peptidase C1A%2C papain IPR000169 Peptidase%2C cysteine peptidase active site
Solyc01g008420	-2.45708	1.54154e-06	5.68929e-06	Mate efflux family protein (AHRD V1 **-- D7KHQ9_ARALY)%3B contains Interpro domain(s) IPR002528 Multi antimicrobial extrusion protein MatE
Solyc10g081570	-2.45298	2.75005e-12	2.15811e-11	KED (AHRD V1 *-*- Q9LW95_TOBAC)
Solyc02g021090	-2.44919	0.000113858	0.000308933	Transposase (Fragment) (AHRD V1 *-*- Q0GJY7_9POAL)
Solyc06g084820	-2.43541	1.54665e-13	1.4119e-12	cytochrome P450
Solyc04g079480	-2.43362	1.14098e-13	1.05699e-12	Serpin (Serine protease inhibitor) (AHRD V1 **-* Q53P13_ORYSJ)%3B contains Interpro domain(s) IPR015554 Protease inhibitor I4%2C serpin%2C plant
Solyc03g093800	-2.42724	3.97501e-08	1.85445e-07	Unknown Protein (AHRD V1)
Solyc07g041920	-2.42302	3.60695e-15	3.95355e-14	Cathepsin L-like cysteine proteinase (AHRD V1 **-* A7LJ78_DERVA)%3B contains Interpro domain(s) IPR013128 Peptidase C1A%2C papain
Solyc01g104710	-2.4221	1.20721e-25	3.77999e-24	Unknown Protein (AHRD V1)
Solyc11g017410	-2.41882	6.04723e-13	5.12446e-12	Unknown Protein (AHRD V1)
Solyc09g005730	-2.41642	4.70422e-22	1.01004e-20	Plant-specific domain TIGR01589 family protein (AHRD V1 ***- B4FFL2_MAIZE)%3B contains Interpro domain(s) IPR006476 Conserved hypothetical protein CHP01589%2C plant
Solyc02g084260	-2.4153	1.15433e-07	5.03867e-07	Unknown Protein (AHRD V1)
Solyc07g055660	-2.41315	2.09893e-37	1.90496e-35	Unknown Protein (AHRD V1)
Solyc09g089580	-2.41077	7.77226e-05	0.000217223	1-aminocyclopropane-1-carboxylate oxidase-like protein (AHRD V1 **-* Q9LTH8_ARATH)%3B contains Interpro domain(s) IPR005123 Oxoglutarate and iron-dependent oxygenase
Solyc06g075170	-2.40947	2.82245e-10	1.73683e-09	Arabidopsis thaliana genomic DNA chromosome 5 P1 clone MOK16 (AHRD V1 ***- Q9LYW2_ARATH)%3B contains Interpro domain(s) IPR007608 Protein of unknown function DUF584
[truncated: 5,097 more rows]

## Sheet: Dataset S3
Dataset S3. Up-regulated genes in the comparison Si vs Sni. Gene name = Solanum lycopersicum reference gene id, logFC = Fold change logged on base 2, p-Value = p-value of differential expression, FDR = adjusted p-value (FDR), description = gene functional annotation.
[truncated: 3,795 more rows]

[truncated: 1 more sheets: Dataset S4]
